# Supplementary material for: Using a thermistor flowmeter with attached video camera for monitoring sponge excurrent speed and oscular behaviour
Source: PeerJ. 2016 Dec 13;4:e2761. doi: 10.7717/peerj.2761 (PMC5157188; doi:10.7717/peerj.2761)
Supplement: Data S4 [file peerj-04-2761-s004.xlsx]

## Sheet: Figure 6 and 8
Date	Time	time elapsed	minutes	Hour	Ambient Temperature (ºC)	Temp moving average	Power (mW)	ES_E7	ES_E8	ES_E9	ES_E10	Light	Darkness	Sediment 1	Sediment (mg/L)	Zero P1	Zero P2	Zero P3	Zero P4	ES_zeroed_E7	ES_zeroed_E8	ES_zeroed_E9	ES_zeroed_E10		Q_E7	Q_E8	Q_E9	Q_E10		Hourly moving average Q_E7	Hourly moving average Q_E8	Hourly moving average Q_E9	Hourly moving average Q_E10
2015-07-14	10:50:50	00:00:05	0.0833333	0.00138889	26.13	#N/A	39.45	18.4418	44.6533	20.4712	200	173.889				6.25693	14	7.918	45.1337	12.1849	30.6533	12.5532	154.866		0.00631799	0.032682	0.00780551	0.439228		#N/A	#N/A	#N/A	#N/A
2015-07-14	10:50:55	00:00:05	0.166667	0.00277778	26.13	#N/A	39.39	17.7155	34.8022	17.2943	200	173.944								11.4586	20.8022	9.3763	154.866		0.00674287	0.0175488	0.00488807	0.439228		#N/A	#N/A	#N/A	#N/A
2015-07-14	10:51:00	00:00:05	0.25	0.00416667	26.13	#N/A	39.17	15.3503	21.5118	31.5552	200	174								9.09337	7.5118	23.6372	154.866		0.00465365	0.00342525	0.0215401	0.439228		#N/A	#N/A	#N/A	#N/A
2015-07-14	10:51:05	00:00:05	0.333333	0.00555556	26.13	#N/A	38.99	13.7085	40.5945	20.9381	200	174.056								7.45157	26.5945	13.0201	154.866		0.00338131	0.0260235	0.00827638	0.439228		#N/A	#N/A	#N/A	#N/A
2015-07-14	10:51:10	00:00:05	0.416667	0.00694444	26.13	#N/A	38.89	12.8922	30.9021	32.0862	200	174.111								6.63527	16.9021	24.1682	154.866		0.00280712	0.0125781	0.0223215	0.439228		#N/A	#N/A	#N/A	#N/A
2015-07-14	10:51:15	00:00:05	0.5	0.00833333	26.12	#N/A	38.75	11.8515	47.2473	23.2941	200	174.167								5.59457	33.2473	15.3761	154.866		0.00213509	0.0372303	0.0108069	0.439228		#N/A	#N/A	#N/A	#N/A
2015-07-14	10:51:20	00:00:05	0.583333	0.00972222	26.13	#N/A	38.66	11.2396	41.2354	21.0968	200	174.222								4.98267	27.2354	13.1788	154.866		0.00177308	0.0270367	0.00843879	0.439228		#N/A	#N/A	#N/A	#N/A
2015-07-14	10:51:25	00:00:05	0.666667	0.0111111	26.13	#N/A	38.88	12.8143	31.5918	18.869	200	174.278								6.55737	17.5918	10.951	154.866		0.00275444	0.0134115	0.00627023	0.439228		#N/A	#N/A	#N/A	#N/A
2015-07-14	10:51:30	00:00:05	0.75	0.0125	26.13	#N/A	38.54	10.4843	40.918	30.2856	200	174.333								4.22737	26.918	22.3676	154.866		0.00136212	0.0265331	0.0197146	0.439228		#N/A	#N/A	#N/A	#N/A
2015-07-14	10:51:35	00:00:05	0.833333	0.0138889	26.13	#N/A	38.69	11.4395	45.7397	22.937	200	174.389								5.18257	31.7397	15.019	154.866		0.00188856	0.0345597	0.0104071	0.439228		#N/A	#N/A	#N/A	#N/A
2015-07-14	10:51:40	00:00:05	0.916667	0.0152778	26.13	#N/A	38.26	8.95996	53.9185	25.5798	200	174.444								2.70303	39.9185	17.6618	154.866		0.000664795	0.0499209	0.0134972	0.439228		#N/A	#N/A	#N/A	#N/A
2015-07-14	10:51:45	00:00:05	1	0.0166667	26.12	#N/A	38.72	11.6432	36.9873	24.2126	200	174.5								5.38627	22.9873	16.2946	154.866		0.00200903	0.020598	0.0118609	0.439228		#N/A	#N/A	#N/A	#N/A
2015-07-14	10:51:50	00:00:05	1.08333	0.0180556	26.12	#N/A	38.7	11.5067	39.6545	33.4534	200	174.556								5.24977	25.6545	25.5354	154.866		0.00192799	0.0245639	0.0243813	0.439228		#N/A	#N/A	#N/A	#N/A
2015-07-14	10:51:55	00:00:05	1.16667	0.0194444	26.12	#N/A	38.4	9.68399	30.4535	38.3301	200	174.611								3.42706	16.4535	30.4121	154.866		0.000972778	0.012047	0.0322705	0.439228		#N/A	#N/A	#N/A	#N/A
2015-07-14	10:52:00	00:00:05	1.25	0.0208333	26.12	#N/A	38.39	9.62982	44.6533	40.7349	200	174.667								3.37289	30.6533	32.8169	154.866		0.000948232	0.032682	0.0364603	0.439228		#N/A	#N/A	#N/A	#N/A
2015-07-14	10:52:05	00:00:05	1.33333	0.0222222	26.12	#N/A	38.97	13.5391	47.6318	19.577	200	174.722								7.28217	33.6318	11.659	154.866		0.00325886	0.0379233	0.00693304	0.439228		#N/A	#N/A	#N/A	#N/A
2015-07-14	10:52:10	00:00:05	1.41667	0.0236111	26.12	#N/A	38.16	8.48541	45.3735	39.0015	200	174.778								2.22848	31.3735	31.0835	154.866		0.000487759	0.0339224	0.0334208	0.439228		#N/A	#N/A	#N/A	#N/A
2015-07-14	10:52:15	00:00:05	1.5	0.025	26.13	#N/A	38.3	9.15985	34.8022	40.7349	200	174.833								2.90292	20.8022	32.8169	154.866		0.000745395	0.0175488	0.0364603	0.439228		#N/A	#N/A	#N/A	#N/A
2015-07-14	10:52:20	00:00:05	1.58333	0.0263889	26.13	#N/A	38.06	8.04138	28.1311	22.4152	200	174.889								1.78445	14.1311	14.4972	154.866		0.000341517	0.00943803	0.00983329	0.439228		#N/A	#N/A	#N/A	#N/A
2015-07-14	10:52:25	00:00:05	1.66667	0.0277778	26.12	#N/A	38.62	10.9802	38.147	45.2942	200	174.944								4.72327	24.147	37.3762	154.866		0.00162736	0.0222901	0.0449202	0.439228		#N/A	#N/A	#N/A	#N/A
2015-07-14	10:52:30	00:00:05	1.75	0.0291667	26.12	#N/A	38.37	9.52301	45.3735	15.2283	200	175								3.26608	31.3735	7.3103	154.866		0.00090053	0.0339224	0.00327907	0.439228		#N/A	#N/A	#N/A	#N/A
2015-07-14	10:52:35	00:00:05	1.83333	0.0305556	26.12	#N/A	38.15	8.43964	32.782	26.825	200	175.056								2.18271	18.782	18.907	154.866		0.00047179	0.0148964	0.0150557	0.439228		#N/A	#N/A	#N/A	#N/A
2015-07-14	10:52:40	00:00:05	1.91667	0.0319444	26.13	#N/A	37.97	7.66754	36.1511	29.7913	200	175.111								1.41061	22.1511	21.8733	154.866		0.000234233	0.0194095	0.0190205	0.439228		#N/A	#N/A	#N/A	#N/A
2015-07-14	10:52:45	00:00:05	2	0.0333333	26.12	#N/A	38.3	9.15985	23.6328	20.7794	200	175.167								2.90292	9.6328	12.8614	154.866		0.000745395	0.00510433	0.00811517	0.439228		#N/A	#N/A	#N/A	#N/A
2015-07-14	10:52:50	00:00:05	2.08333	0.0347222	26.12	#N/A	37.95	7.58743	22.8455	30.7861	200	175.222								1.3305	8.8455	22.8681	154.866		0.000213265	0.00445187	0.020427	0.439228		#N/A	#N/A	#N/A	#N/A
2015-07-14	10:52:55	00:00:05	2.16667	0.0361111	26.12	#N/A	38.72	11.6432	31.1279	23.114	200	175.278								5.38627	17.1279	15.196	154.866		0.00200903	0.0128487	0.0106046	0.439228		#N/A	#N/A	#N/A	#N/A
2015-07-14	10:53:00	00:00:05	2.25	0.0375	26.12	#N/A	38.3	9.15985	29.7974	23.6572	200	175.333								2.90292	15.7974	15.7392	154.866		0.000745395	0.0112858	0.0112191	0.439228		#N/A	#N/A	#N/A	#N/A
2015-07-14	10:53:05	00:00:05	2.33333	0.0388889	26.13	#N/A	37.82	7.09229	37.851	19.0094	187.512	175.389								0.83536	23.851	11.0914	142.378		0.000101084	0.0218534	0.00639967	0.383816		#N/A	#N/A	#N/A	#N/A
2015-07-14	10:53:10	00:00:05	2.41667	0.0402778	26.13	#N/A	37.79	6.98395	41.5649	21.7438	163.489	175.444								0.72702	27.5649	13.8258	118.355		8.08946e-05	0.0275633	0.00911311	0.28536		#N/A	#N/A	#N/A	#N/A
2015-07-14	10:53:15	00:00:05	2.5	0.0416667	26.13	#N/A	38.31	9.21021	31.3599	34.021	177.93	175.5								2.95328	17.3599	26.103	132.796		0.000766245	0.013129	0.0252564	0.343233		#N/A	#N/A	#N/A	#N/A
2015-07-14	10:53:20	00:00:05	2.58333	0.0430556	26.13	#N/A	38.13	8.34885	29.5807	33.1726	200	175.556								2.09192	15.5807	25.2546	154.866		0.000440711	0.0110385	0.0239526	0.439228		#N/A	#N/A	#N/A	#N/A
2015-07-14	10:53:25	00:00:05	2.66667	0.0444444	26.12	#N/A	38.52	10.3653	41.8945	32.8979	200	175.611								4.10837	27.8945	24.9799	154.866		0.00130114	0.0280938	0.0235361	0.439228		#N/A	#N/A	#N/A	#N/A
2015-07-14	10:53:30	00:00:05	2.75	0.0458333	26.13	#N/A	38.43	9.84879	26.5808	27.9236	189.807	175.667								3.59186	12.5808	20.0056	144.673		0.00104889	0.00783306	0.0164834	0.393788		#N/A	#N/A	#N/A	#N/A
2015-07-14	10:53:35	00:00:05	2.83333	0.0472222	26.13	#N/A	38.1	8.21533	44.6533	21.2555	190.576	175.722								1.9584	30.6533	13.3375	145.442		0.000396469	0.032682	0.00860238	0.397151		#N/A	#N/A	#N/A	#N/A
2015-07-14	10:53:40	00:00:05	2.91667	0.0486111	26.13	#N/A	37.97	7.66754	31.3599	29.0741	200	175.778								1.41061	17.3599	21.1561	154.866		0.000234233	0.013129	0.0180301	0.439228		#N/A	#N/A	#N/A	#N/A
2015-07-14	10:53:45	00:00:05	3	0.05	26.13	#N/A	37.25	5.35049	30.2307	24.4019	200	175.833								-0.90644	16.2307	16.4839	154.866		0	0.0117864	0.0120827	0.439228		#N/A	#N/A	#N/A	#N/A
2015-07-14	10:53:50	00:00:05	3.08333	0.0513889	26.13	#N/A	38.47	10.0739	47.2473	33.1726	200	175.889								3.81697	33.2473	25.2546	154.866		0.00115631	0.0372303	0.0239526	0.439228		#N/A	#N/A	#N/A	#N/A
2015-07-14	10:53:55	00:00:05	3.16667	0.0527778	26.13	#N/A	37.71	6.70547	27.3407	44.8914	199.243	175.944								0.44854	13.3407	36.9734	154.109		3.7281e-05	0.00860569	0.0441463	0.43579		#N/A	#N/A	#N/A	#N/A
2015-07-14	10:54:00	00:00:05	3.25	0.0541667	26.13	#N/A	37.97	7.66754	19.5023	34.021	164.819	176								1.41061	5.5023	26.103	119.685		0.000234233	0.00207889	0.0252564	0.290521		#N/A	#N/A	#N/A	#N/A
2015-07-14	10:54:05	00:00:05	3.33333	0.0555556	26.13	#N/A	38.35	9.41772	26.3947	32.6233	187.512	176.056								3.16079	12.3947	24.7053	142.378		0.00085442	0.00764803	0.0231225	0.383816		#N/A	#N/A	#N/A	#N/A
2015-07-14	10:54:10	00:00:05	3.41667	0.0569444	26.12	#N/A	38.62	10.9802	23.6328	37.677	180.823	176.111								4.72327	9.6328	29.759	135.689		0.00162736	0.00510433	0.0311661	0.355306		#N/A	#N/A	#N/A	#N/A
2015-07-14	10:54:15	00:00:05	3.5	0.0583333	26.12	#N/A	38.02	7.87277	18.2953	41.4551	200	176.167								1.61584	4.2953	33.5371	154.866		0.000291253	0.0013974	0.0377522	0.439228		#N/A	#N/A	#N/A	#N/A
2015-07-14	10:54:20	00:00:05	3.58333	0.0597222	26.12	#N/A	38.15	8.43964	20.0134	32.3547	200	176.222								2.18271	6.0134	24.4367	154.866		0.00047179	0.00239722	0.0227206	0.439228		#N/A	#N/A	#N/A	#N/A
2015-07-14	10:54:25	00:00:05	3.66667	0.0611111	26.12	#N/A	37.79	6.98395	37.2742	30.5359	200	176.278								0.72702	23.2742	22.6179	154.866		8.08946e-05	0.021012	0.0200697	0.439228		#N/A	#N/A	#N/A	#N/A
2015-07-14	10:54:30	00:00:05	3.75	0.0625	26.12	#N/A	37.96	7.62787	41.2354	39.6851	200	176.333								1.37094	27.2354	31.7671	154.866		0.000223757	0.0270367	0.0346076	0.439228		#N/A	#N/A	#N/A	#N/A
2015-07-14	10:54:35	00:00:05	3.83333	0.0638889	26.12	#N/A	38.06	8.04138	22.3877	32.6233	194.458	176.389								1.78445	8.3877	24.7053	149.324		0.000341517	0.00408811	0.0231225	0.41429		#N/A	#N/A	#N/A	#N/A
2015-07-14	10:54:40	00:00:05	3.91667	0.0652778	26.12	#N/A	38.54	10.4843	20.9503	46.5332	184.509	176.444								4.22737	6.9503	38.6152	139.375		0.00136212	0.00302394	0.0473325	0.370914		#N/A	#N/A	#N/A	#N/A
2015-07-14	10:54:45	00:00:05	4	0.0666667	26.12	#N/A	38.79	12.1384	25.4883	38.6597	183.032	176.5								5.88147	11.4883	30.7417	137.898		0.00231342	0.00677095	0.0328333	0.36463		#N/A	#N/A	#N/A	#N/A
2015-07-14	10:54:50	00:00:05	4.08333	0.0680556	26.12	#N/A	38.52	10.3653	31.3599	47.8088	183.765	176.556								4.10837	17.3599	39.8908	138.631		0.00130114	0.013129	0.0498654	0.367743		#N/A	#N/A	#N/A	#N/A
2015-07-14	10:54:55	00:00:05	4.16667	0.0694444	26.12	#N/A	38.95	13.3743	28.5339	38.6597	175.085	176.611								7.11737	14.5339	30.7417	129.951		0.00314138	0.00987325	0.0328333	0.331515		#N/A	#N/A	#N/A	#N/A
2015-07-14	10:55:00	00:00:05	4.25	0.0708333	26.12	#N/A	38.94	13.2919	20.2759	26.1932	200	176.667								7.03497	6.2759	18.2752	154.866		0.00308324	0.00256727	0.0142569	0.439228		#N/A	#N/A	#N/A	#N/A
2015-07-14	10:55:05	00:00:05	4.33333	0.0722222	26.12	#N/A	39.32	16.9159	25.1373	34.3079	200	176.722								10.659	11.1373	26.3899	154.866		0.00600419	0.0064422	0.0257031	0.439228		#N/A	#N/A	#N/A	#N/A
2015-07-14	10:55:10	00:00:05	4.41667	0.0736111	26.12	#N/A	39.21	15.7486	52.1484	45.2942	175.793	176.778								9.49167	38.1484	37.3762	130.659		0.0049849	0.0464181	0.0449202	0.334417		#N/A	#N/A	#N/A	#N/A
2015-07-14	10:55:15	00:00:05	4.5	0.075	26.13	#N/A	39.65	21.1517	15.4861	37.677	166.821	176.833								14.8948	1.4861	29.759	121.687		0.0102694	0.000254662	0.0311661	0.298355		#N/A	#N/A	#N/A	#N/A
2015-07-14	10:55:20	00:00:05	4.58333	0.0763889	26.13	#N/A	39.77	23.0255	32.782	29.3091	179.37	176.889								16.7686	18.782	21.3911	134.236		0.0124191	0.0148964	0.0183524	0.349223		#N/A	#N/A	#N/A	#N/A
2015-07-14	10:55:25	00:00:05	4.66667	0.0777778	26.13	#N/A	39.95	26.2543	33.0261	43.7134	200	176.944								19.9974	19.0261	35.7954	154.866		0.0164725	0.0152081	0.041912	0.439228		#N/A	#N/A	#N/A	#N/A
2015-07-14	10:55:30	00:00:05	4.75	0.0791667	26.12	#N/A	40.04	28.0823	41.2354	50.9521	168.848	177								21.8254	27.2354	43.0341	123.714		0.0189537	0.0270367	0.0563164	0.306366		#N/A	#N/A	#N/A	#N/A
2015-07-14	10:55:35	00:00:05	4.83333	0.0805556	26.12	#N/A	40.15	30.5481	37.2742	42.5659	143.213	177.056								24.2912	23.2742	34.6479	98.0793		0.0225039	0.021012	0.0397778	0.211101		#N/A	#N/A	#N/A	#N/A
2015-07-14	10:55:40	00:00:05	4.91667	0.0819444	26.13	#N/A	40.38	36.6638	34.2834	33.4534	145.52	177.111								30.4069	20.2834	25.5354	100.386		0.0322616	0.0168521	0.0243813	0.219122		#N/A	#N/A	#N/A	#N/A
2015-07-14	10:55:45	00:00:05	5	0.0833333	26.13	#N/A	40.44	38.5071	16.5588	37.3535	194.458	177.167								32.2502	2.5588	29.4355	149.324		0.0354556	0.000608821	0.0306245	0.41429		#N/A	#N/A	#N/A	#N/A
2015-07-14	10:55:50	00:00:05	5.08333	0.0847222	26.12	#N/A	40.68	47.168	25.4883	34.021	130.646	177.222								40.9111	11.4883	26.103	85.5123		0.0519269	0.00677095	0.0252564	0.169423		#N/A	#N/A	#N/A	#N/A
2015-07-14	10:55:55	00:00:05	5.16667	0.0861111	26.13	#N/A	40.67	46.7651	36.4258	58.5693	97.9553	177.278								40.5082	22.4258	50.6513	52.8216		0.051109	0.019797	0.0731413	0.0782328		#N/A	#N/A	#N/A	#N/A
2015-07-14	10:56:00	00:00:05	5.25	0.0875	26.12	#N/A	40.79	51.9653	28.7415	45.7031	173.682	177.333								45.7084	14.7415	37.7851	128.548		0.0620344	0.0101004	0.0457111	0.325793		#N/A	#N/A	#N/A	#N/A
2015-07-14	10:56:05	00:00:05	5.33333	0.0888889	26.12	#N/A	40.8	52.4292	33.7708	41.4551	119.238	177.389								46.1723	19.7708	33.5371	74.1043		0.0630473	0.0161742	0.0377522	0.134657		#N/A	#N/A	#N/A	#N/A
2015-07-14	10:56:10	00:00:05	5.41667	0.0902778	26.13	#N/A	40.89	56.8604	60.1929	47.3755	123.572	177.444								50.6035	46.1929	39.4575	78.4383		0.0730305	0.0630925	0.0489994	0.14751		#N/A	#N/A	#N/A	#N/A
2015-07-14	10:56:15	00:00:05	5.5	0.0916667	26.12	#N/A	41.02	64.1113	37.2742	52.8564	103.467	177.5								57.8544	23.2742	44.9384	58.3333		0.0905287	0.021012	0.0603668	0.0917338		#N/A	#N/A	#N/A	#N/A
2015-07-14	10:56:20	00:00:05	5.58333	0.0930556	26.13	#N/A	41.1	69.1528	39.6545	63.7817	121.143	177.556								62.8959	25.6545	55.8637	76.0093		0.103512	0.0245639	0.0855845	0.140252		#N/A	#N/A	#N/A	#N/A
2015-07-14	10:56:25	00:00:05	5.66667	0.0944444	26.13	#N/A	41.14	71.8628	37.561	61.4014	134.875	177.611								65.6059	23.561	53.4834	89.7413		0.110758	0.0214288	0.079811	0.183062		#N/A	#N/A	#N/A	#N/A
2015-07-14	10:56:30	00:00:05	5.75	0.0958333	26.12	#N/A	41.14	71.8628	28.7415	41.0889	114.166	177.667								65.6059	14.7415	33.1709	69.0323		0.110758	0.0101004	0.0370932	0.120182		#N/A	#N/A	#N/A	#N/A
2015-07-14	10:56:35	00:00:05	5.83333	0.0972222	26.12	#N/A	41.22	77.6733	33.0261	42.1875	116.443	177.722								71.4164	19.0261	34.2695	71.3093		0.126909	0.0152081	0.0390833	0.126604		#N/A	#N/A	#N/A	#N/A
2015-07-14	10:56:40	00:00:05	5.91667	0.0986111	26.12	#N/A	41.23	78.4424	28.949	66.2842	125.549	177.778								72.1855	14.949	58.3662	80.4153		0.129108	0.0103294	0.0918168	0.153519		#N/A	#N/A	#N/A	#N/A
2015-07-14	10:56:45	00:00:05	6	0.1	26.12	#N/A	41.22	77.6733	39.3433	45.7031	123.572	177.833								71.4164	25.3433	37.7851	78.4383		0.126909	0.0240877	0.0457111	0.14751		#N/A	#N/A	#N/A	#N/A
2015-07-14	10:56:50	00:00:05	6.08333	0.101389	26.12	#N/A	41.2	76.1719	29.7974	46.9482	111.938	177.889								69.915	15.7974	39.0302	66.8043		0.122656	0.0112858	0.0481511	0.114021		#N/A	#N/A	#N/A	#N/A
2015-07-14	10:56:55	00:00:05	6.16667	0.102778	26.12	#N/A	41.18	74.6948	35.3333	59.6802	97.1924	177.944								68.4379	21.3333	51.7622	52.0587		0.118526	0.0182729	0.0757314	0.0764284		#N/A	#N/A	#N/A	#N/A
2015-07-14	10:57:00	00:00:05	6.25	0.104167	26.12	#N/A	41.22	77.6733	40.2771	50.0305	86.853	178								71.4164	26.2771	42.1125	41.7193		0.126909	0.0255271	0.0543944	0.0535821		#N/A	#N/A	#N/A	#N/A
2015-07-14	10:57:05	00:00:05	6.33333	0.105556	26.12	#N/A	41.21	76.9165	44.6533	40.7349	111.938	178.056								70.6596	30.6533	32.8169	66.8043		0.124758	0.032682	0.0364603	0.114021		#N/A	#N/A	#N/A	#N/A
2015-07-14	10:57:10	00:00:05	6.41667	0.106944	26.12	#N/A	41.21	76.9165	45.3735	44.0979	83.5693	178.111								70.6596	31.3735	36.1799	38.4356		0.124758	0.0339224	0.0426364	0.0469799		#N/A	#N/A	#N/A	#N/A
2015-07-14	10:57:15	00:00:05	6.5	0.108333	26.12	#N/A	41.16	73.2666	40.2771	49.5728	99.4995	178.167								67.0097	26.2771	41.6548	54.3658		0.114584	0.0255271	0.0534493	0.0819336		#N/A	#N/A	#N/A	#N/A
2015-07-14	10:57:20	00:00:05	6.58333	0.109722	26.12	#N/A	41.21	76.9165	40.918	62.5854	79.4983	178.222								70.6596	26.918	54.6674	34.3646		0.124758	0.0265331	0.0826639	0.0392574		#N/A	#N/A	#N/A	#N/A
2015-07-14	10:57:25	00:00:05	6.66667	0.111111	26.12	#N/A	41.2	76.1719	58.1726	55.8838	70.6604	178.278								69.915	44.1726	47.9658	25.5267		0.122656	0.0587252	0.0670214	0.0243679		#N/A	#N/A	#N/A	#N/A
2015-07-14	10:57:30	00:00:05	6.75	0.1125	26.12	#N/A	41.22	77.6733	59.6802	56.9458	55.2612	178.333								71.4164	45.6802	49.0278	10.1275		0.126909	0.0619731	0.0694175	0.00553128		#N/A	#N/A	#N/A	#N/A
2015-07-14	10:57:35	00:00:05	6.83333	0.113889	26.12	#N/A	41.22	77.6733	40.918	40.7349	57.3303	178.389								71.4164	26.918	32.8169	12.1966		0.126909	0.0265331	0.0364603	0.00745293		#N/A	#N/A	#N/A	#N/A
2015-07-14	10:57:40	00:00:05	6.91667	0.115278	26.12	#N/A	41.22	77.6733	33.0261	49.1272	54.0619	178.444								71.4164	19.0261	41.2092	8.92821		0.126909	0.0152081	0.0525351	0.00451882		#N/A	#N/A	#N/A	#N/A
2015-07-14	10:57:45	00:00:05	7	0.116667	26.12	#N/A	41.21	76.9165	56.2317	43.3228	55.8746	178.5								70.6596	42.2317	35.4048	10.7409		0.124758	0.0546416	0.0411808	0.0060784		#N/A	#N/A	#N/A	#N/A
2015-07-14	10:57:50	00:00:05	7.08333	0.118056	26.12	#N/A	41.22	77.6733	48.4192	51.8921	60.6018	178.556								71.4164	34.4192	43.9741	15.4681		0.126909	0.0393575	0.0583025	0.0109108		#N/A	#N/A	#N/A	#N/A
2015-07-14	10:57:55	00:00:05	7.16667	0.119444	26.12	#N/A	41.22	77.6733	45.0073	40.0269	63.6047	178.611								71.4164	31.0073	32.1089	18.471		0.126909	0.0332895	0.0352068	0.0145027		#N/A	#N/A	#N/A	#N/A
2015-07-14	10:58:00	00:00:05	7.25	0.120833	26.12	#N/A	41.22	77.6733	37.2742	47.8088	59.7107	178.667								71.4164	23.2742	39.8908	14.577		0.126909	0.021012	0.0498654	0.00992027		#N/A	#N/A	#N/A	#N/A
2015-07-14	10:58:05	00:00:05	7.33333	0.122222	26.12	#N/A	41.22	77.6733	50.0366	50.4883	62.2009	178.722								71.4164	36.0366	42.5703	17.0672		0.126909	0.0423659	0.055346	0.0127758		#N/A	#N/A	#N/A	#N/A
2015-07-14	10:58:10	00:00:05	7.41667	0.123611	26.12	#N/A	41.22	77.6733	43.9392	42.9443	52.124	178.778								71.4164	29.9392	35.0263	6.99031		0.126909	0.0314694	0.0404769	0.00305191		#N/A	#N/A	#N/A	#N/A
2015-07-14	10:58:15	00:00:05	7.5	0.125	26.12	#N/A	41.22	77.6733	77.6489	46.5332	51.1871	178.833								71.4164	63.6489	38.6152	6.05341		0.126909	0.105507	0.0473325	0.00242285		#N/A	#N/A	#N/A	#N/A
2015-07-14	10:58:20	00:00:05	7.58333	0.126389	26.12	#N/A	41.08	67.8467	69.165	47.3755	52.89	178.889								61.5898	55.165	39.4575	7.75631		0.100085	0.0838741	0.0489994	0.00360584		#N/A	#N/A	#N/A	#N/A
2015-07-14	10:58:25	00:00:05	7.66667	0.127778	26.12	#N/A	41.08	67.8467	50.0366	58.02	50.6348	178.944								61.5898	36.0366	50.102	5.50111		0.100085	0.0423659	0.0718732	0.00207817		#N/A	#N/A	#N/A	#N/A
2015-07-14	10:58:30	00:00:05	7.75	0.129167	26.12	#N/A	40.97	61.1938	50.0366	47.3755	47.7936	179								54.9369	36.0366	39.4575	2.65991		0.0833184	0.0423659	0.0489994	0.000647867		#N/A	#N/A	#N/A	#N/A
2015-07-14	10:58:35	00:00:05	7.83333	0.130556	26.12	#N/A	41.02	64.1113	45.7397	47.3755	43.5547	179.056								57.8544	31.7397	39.4575	-1.57899		0.0905287	0.0345597	0.0489994	0		#N/A	#N/A	#N/A	#N/A
2015-07-14	10:58:40	00:00:05	7.91667	0.131944	26.12	#N/A	41.13	71.167	43.9392	59.1187	37.4603	179.111								64.9101	29.9392	51.2007	-7.67339		0.10888	0.0314694	0.074418	0		#N/A	#N/A	#N/A	#N/A
2015-07-14	10:58:45	00:00:05	8	0.133333	26.12	#N/A	41.18	74.6948	41.5649	54.3457	57.7576	179.167								68.4379	27.5649	46.4277	12.6239		0.118526	0.0275633	0.0636077	0.00787615		#N/A	#N/A	#N/A	#N/A
2015-07-14	10:58:50	00:00:05	8.08333	0.134722	26.12	#N/A	41.12	70.4956	69.165	42.5659	46.9421	179.222								64.2387	55.165	34.6479	1.80841		0.107079	0.0838741	0.0397778	0.000348902		#N/A	#N/A	#N/A	#N/A
2015-07-14	10:58:55	00:00:05	8.16667	0.136111	26.12	#N/A	41.16	73.2666	65.0635	42.1875	55.6702	179.278								67.0097	51.0635	34.2695	10.5365		0.114584	0.0740984	0.0390833	0.00589393		#N/A	#N/A	#N/A	#N/A
2015-07-14	10:59:00	00:00:05	8.25	0.1375	26.12	#N/A	41.19	75.4272	68.5669	48.6816	50.4517	179.333								69.1703	54.5669	40.7636	5.31801		0.120567	0.0824202	0.0516269	0.00196834		#N/A	#N/A	#N/A	#N/A
2015-07-14	10:59:05	00:00:05	8.33333	0.138889	26.12	#N/A	41.1	69.1528	76.9531	48.6816	65.7837	179.389								62.8959	62.9531	40.7636	20.65		0.103512	0.103663	0.0516269	0.0173433		#N/A	#N/A	#N/A	#N/A
2015-07-14	10:59:10	00:00:05	8.41667	0.140278	26.12	#N/A	41.08	67.8467	71.0205	63.7817	43.7103	179.444								61.5898	57.0205	55.8637	-1.42339		0.100085	0.088445	0.0855845	0		#N/A	#N/A	#N/A	#N/A
2015-07-14	10:59:15	00:00:05	8.5	0.141667	26.12	#N/A	41.14	71.8628	66.7847	47.8088	47.9645	179.5								65.6059	52.7847	39.8908	2.83081		0.110758	0.0781452	0.0498654	0.000715919		#N/A	#N/A	#N/A	#N/A
2015-07-14	10:59:20	00:00:05	8.58333	0.143056	26.12	#N/A	41.08	67.8467	66.1987	48.2422	49.3683	179.556								61.5898	52.1987	40.3242	4.23461		0.100085	0.0767583	0.0507372	0.00136587		#N/A	#N/A	#N/A	#N/A
2015-07-14	10:59:25	00:00:05	8.66667	0.144444	26.12	#N/A	41.13	71.167	48.8159	46.9482	59.491	179.611								64.9101	34.8159	39.0302	14.3573		0.10888	0.0400877	0.0481511	0.00968154		#N/A	#N/A	#N/A	#N/A
2015-07-14	10:59:30	00:00:05	8.75	0.145833	26.12	#N/A	41.05	65.9546	61.7676	62.5854	37.3322	179.667								59.6977	47.7676	54.6674	-7.80149		0.0951996	0.0665778	0.0826639	0		#N/A	#N/A	#N/A	#N/A
2015-07-14	10:59:35	00:00:05	8.83333	0.147222	26.12	#N/A	40.98	61.7676	71.0205	68.2373	53.8635	179.722								55.5107	57.0205	60.3193	8.72981		0.0847187	0.088445	0.0967946	0.00435884		#N/A	#N/A	#N/A	#N/A
2015-07-14	10:59:40	00:00:05	8.91667	0.148611	26.12	#N/A	41.14	71.8628	57.1899	52.3804	33.9081	179.778								65.6059	43.1899	44.4624	-11.2256		0.110758	0.0566438	0.0593444	0		#N/A	#N/A	#N/A	#N/A
2015-07-14	10:59:45	00:00:05	9	0.15	26.12	#N/A	41.02	64.1113	70.3979	56.9458	47.2809	179.833								57.8544	56.3979	49.0278	2.14721		0.0905287	0.0869011	0.0694175	0.000459543		#N/A	#N/A	#N/A	#N/A
2015-07-14	10:59:50	00:00:05	9.08333	0.151389	26.12	#N/A	40.96	60.6323	55.2917	61.9873	56.9092	179.889								54.3754	41.2917	54.0693	11.7755		0.0819567	0.0527039	0.081218	0.00704451		#N/A	#N/A	#N/A	#N/A
2015-07-14	10:59:55	00:00:05	9.16667	0.152778	26.12	#N/A	40.89	56.8604	73.5962	69.5679	53.6682	179.944								50.6035	59.5962	61.6499	8.53451		0.0730305	0.0949401	0.100242	0.00420349		#N/A	#N/A	#N/A	#N/A
2015-07-14	11:00:00	00:00:05	9.25	0.154167	26.12	#N/A	40.87	55.835	71.6553	57.4768	55.4657	180								49.5781	57.6553	49.5588	10.332		0.0706714	0.0900296	0.0706274	0.00571152		#N/A	#N/A	#N/A	#N/A
2015-07-14	11:00:05	00:00:05	9.33333	0.155556	26.12	#N/A	40.96	60.6323	72.3022	43.7134	36.0641	180.056								54.3754	58.3022	35.7954	-9.06959		0.0819567	0.0916554	0.041912	0		#N/A	#N/A	#N/A	#N/A
2015-07-14	11:00:10	00:00:05	9.41667	0.156944	26.12	#N/A	40.93	58.9722	74.9146	44.4946	55.2612	180.111								52.7153	60.9146	36.5766	10.1275		0.0779804	0.0983314	0.0433888	0.00553128		#N/A	#N/A	#N/A	#N/A
2015-07-14	11:00:15	00:00:05	9.5	0.158333	26.12	#N/A	40.92	58.4351	71.0205	44.0979	52.6978	180.167								52.1782	57.0205	36.1799	7.56411		0.0767099	0.088445	0.0426364	0.00346359		#N/A	#N/A	#N/A	#N/A
2015-07-14	11:00:20	00:00:05	9.58333	0.159722	26.12	#N/A	40.81	52.8931	85.791	44.0979	48.6603	180.222								46.6362	71.791	36.1799	3.52661		0.0640665	0.127978	0.0426364	0.0010185		#N/A	#N/A	#N/A	#N/A
2015-07-14	11:00:25	00:00:05	9.66667	0.161111	26.12	#N/A	40.84	54.3396	64.4958	50.4883	52.124	180.278								48.0827	50.4958	42.5703	6.99031		0.0672836	0.0727815	0.055346	0.00305191		#N/A	#N/A	#N/A	#N/A
2015-07-14	11:00:30	00:00:05	9.75	0.1625	26.12	#N/A	40.73	49.2798	69.165	49.5728	42.4896	180.333								43.0229	55.165	41.6548	-2.64409		0.0562928	0.0838741	0.0534493	0		#N/A	#N/A	#N/A	#N/A
2015-07-14	11:00:35	00:00:05	9.83333	0.163889	26.12	#N/A	40.71	48.4192	65.625	48.2422	52.89	180.389								42.1623	51.625	40.3242	7.75631		0.0544976	0.0754096	0.0507372	0.00360584		#N/A	#N/A	#N/A	#N/A
2015-07-14	11:00:40	00:00:05	9.91667	0.165278	26.12	#N/A	40.7	47.998	76.9531	67.5781	44.6533	180.444								41.7411	62.9531	59.6601	-0.480391		0.053627	0.103663	0.0951035	0		#N/A	#N/A	#N/A	#N/A
2015-07-14	11:00:45	00:00:05	10	0.166667	26.12	#N/A	40.67	46.7651	76.9531	54.3457	40.1642	180.5								40.5082	62.9531	46.4277	-4.96949		0.051109	0.103663	0.0636077	0		#N/A	#N/A	#N/A	#N/A
2015-07-14	11:00:50	00:00:05	10.0833	0.168056	26.12	#N/A	40.59	43.6584	65.0635	49.5728	57.3303	180.556								37.4015	51.0635	41.6548	12.1966		0.0449689	0.0740984	0.0534493	0.00745293		#N/A	#N/A	#N/A	#N/A
2015-07-14	11:00:55	00:00:05	10.1667	0.169444	26.12	#N/A	40.7	47.998	56.7139	46.1182	46.4417	180.611								41.7411	42.7139	38.2002	1.30801		0.053627	0.0556458	0.0465192	0.000207512		#N/A	#N/A	#N/A	#N/A
2015-07-14	11:01:00	00:00:05	10.25	0.170833	26.12	#N/A	40.66	46.3623	47.6318	47.3755	45.6177	180.667								40.1054	33.6318	39.4575	0.484009		0.0502963	0.0379233	0.0489994	4.21215e-05		#N/A	#N/A	#N/A	#N/A
2015-07-14	11:01:05	00:00:05	10.3333	0.172222	26.12	#N/A	40.71	48.4192	60.1929	54.8584	70.3918	180.722								42.1623	46.1929	46.9404	25.2581		0.0544976	0.0630925	0.0647382	0.023958		#N/A	#N/A	#N/A	#N/A
2015-07-14	11:01:10	00:00:05	10.4167	0.173611	26.12	#N/A	40.64	45.5688	49.6216	50.0305	34.256	180.778								39.3119	35.6216	42.1125	-10.8777		0.0487097	0.041586	0.0543944	0		#N/A	#N/A	#N/A	#N/A
2015-07-14	11:01:15	00:00:05	10.5	0.175	26.12	#N/A	40.67	46.7651	70.3979	58.02	56.7017	180.833								40.5082	56.3979	50.102	11.568		0.051109	0.0869011	0.0718732	0.00684646		#N/A	#N/A	#N/A	#N/A
2015-07-14	11:01:20	00:00:05	10.5833	0.176389	26.12	#N/A	40.75	50.1526	81.2378	54.3457	71.1975	180.889								43.8957	67.2378	46.4277	26.0638		0.0581358	0.11521	0.0636077	0.0251956		#N/A	#N/A	#N/A	#N/A
2015-07-14	11:01:25	00:00:05	10.6667	0.177778	26.12	#N/A	40.69	47.583	73.5962	56.4087	48.1384	180.944								41.3261	59.5962	48.4907	3.00471		0.0527743	0.0949401	0.0682017	0.000787761		#N/A	#N/A	#N/A	#N/A
2015-07-14	11:01:30	00:00:05	10.75	0.179167	26.12	#N/A	40.77	51.0498	81.9824	61.9873	44.9707	181								44.7929	67.9824	54.0693	-0.162991		0.0600535	0.117264	0.081218	0		#N/A	#N/A	#N/A	#N/A
2015-07-14	11:01:35	00:00:05	10.8333	0.180556	26.12	#N/A	40.72	48.8464	60.7117	55.3711	51.001	181.056								42.5895	46.7117	47.4531	5.86731		0.055386	0.064233	0.0658761	0.00230449		#N/A	#N/A	#N/A	#N/A
2015-07-14	11:01:40	00:00:05	10.9167	0.181944	26.12	#N/A	40.78	51.5015	80.5054	44.4946	33.5632	181.111								45.2446	66.5054	36.5766	-11.5705		0.0610278	0.113204	0.0433888	0		#N/A	#N/A	#N/A	#N/A
2015-07-14	11:01:45	00:00:05	11	0.183333	26.12	#N/A	40.72	48.8464	62.3047	64.4043	42.4896	181.167								42.5895	48.3047	56.4863	-2.64409		0.055386	0.0677826	0.0871196	0		#N/A	#N/A	#N/A	#N/A
2015-07-14	11:01:50	00:00:05	11.0833	0.184722	26.12	#N/A	40.77	51.0498	66.7847	63.1836	58.1848	181.222								44.7929	52.7847	55.2656	13.0511		0.0600535	0.0781452	0.0841195	0.00830802		#N/A	#N/A	#N/A	#N/A
2015-07-14	11:01:55	00:00:05	11.1667	0.186111	26.12	#N/A	40.85	54.834	85.791	51.8921	46.2738	181.278								48.5771	71.791	43.9741	1.14011		0.0683967	0.127978	0.0583025	0.000166472		#N/A	#N/A	#N/A	#N/A
2015-07-14	11:02:00	00:00:05	11.25	0.1875	26.12	#N/A	40.81	52.8931	71.0205	65.0269	51.9348	181.333								46.6362	57.0205	57.1089	6.80111		0.0640665	0.088445	0.088665	0.0029205		#N/A	#N/A	#N/A	#N/A
2015-07-14	11:02:05	00:00:05	11.3333	0.188889	26.12	#N/A	40.84	54.3396	74.9146	74.4873	52.6978	181.389								48.0827	60.9146	66.5693	7.56411		0.0672836	0.0983314	0.113379	0.00346359		#N/A	#N/A	#N/A	#N/A
2015-07-14	11:02:10	00:00:05	11.4167	0.190278	26.12	#N/A	40.78	51.5015	80.5054	59.6802	43.5547	181.444								45.2446	66.5054	51.7622	-1.57899		0.0610278	0.113204	0.0757314	0		#N/A	#N/A	#N/A	#N/A
2015-07-14	11:02:15	00:00:05	11.5	0.191667	26.12	#N/A	40.8	52.4292	68.5669	57.4768	51.7487	181.5								46.1723	54.5669	49.5588	6.61501		0.0630473	0.0824202	0.0706274	0.00279338		#N/A	#N/A	#N/A	#N/A
2015-07-14	11:02:20	00:00:05	11.5833	0.193056	26.12	#N/A	40.9	57.373	72.937	53.8452	45.2942	181.556								51.1161	58.937	45.9272	0.160509		0.0742208	0.0932613	0.0625114	7.17168e-06		#N/A	#N/A	#N/A	#N/A
2015-07-14	11:02:25	00:00:05	11.6667	0.194444	26.12	#N/A	40.93	58.9722	83.4839	66.2842	48.8373	181.611								52.7153	69.4839	58.3662	3.70361		0.0779804	0.121446	0.0918168	0.00110173		#N/A	#N/A	#N/A	#N/A
2015-07-14	11:02:30	00:00:05	11.75	0.195833	26.12	#N/A	41.05	65.9546	63.9404	53.3508	49.3683	181.667								59.6977	49.9404	45.4328	4.23461		0.0951996	0.0715017	0.0614356	0.00136587		#N/A	#N/A	#N/A	#N/A
2015-07-14	11:02:35	00:00:05	11.8333	0.197222	26.12	#N/A	41.02	64.1113	67.9688	50.4883	43.2495	181.722								57.8544	53.9688	42.5703	-1.88419		0.0905287	0.080976	0.055346	0		#N/A	#N/A	#N/A	#N/A
2015-07-14	11:02:40	00:00:05	11.9167	0.198611	26.12	#N/A	40.98	61.7676	74.9146	60.8276	46.4417	181.778								55.5107	60.9146	52.9096	1.30801		0.0847187	0.0983314	0.078442	0.000207512		#N/A	#N/A	#N/A	#N/A
2015-07-14	11:02:45	00:00:05	12	0.2	26.12	#N/A	41.03	64.7217	67.3706	47.3755	54.8584	181.833								58.4648	53.3706	39.4575	9.72471		0.0920657	0.0795411	0.0489994	0.00518267		#N/A	#N/A	#N/A	#N/A
2015-07-14	11:02:50	00:00:05	12.0833	0.201389	26.12	#N/A	41.11	69.8242	81.2378	50.0305	48.1384	181.889								63.5673	67.2378	42.1125	3.00471		0.10529	0.11521	0.0543944	0.000787761		#N/A	#N/A	#N/A	#N/A
2015-07-14	11:02:55	00:00:05	12.1667	0.202778	26.12	#N/A	41.07	67.2119	76.9531	44.8914	53.0823	181.944								60.955	62.9531	36.9734	7.94861		0.098436	0.103663	0.0441463	0.0037503		#N/A	#N/A	#N/A	#N/A
2015-07-14	11:03:00	00:00:05	12.25	0.204167	26.12	#N/A	41	62.9272	75.5859	58.5693	55.2612	182								56.6703	61.5859	50.6513	10.1275		0.0875752	0.100075	0.0731413	0.00553128		#N/A	#N/A	#N/A	#N/A
2015-07-14	11:03:05	00:00:05	12.3333	0.205556	26.12	#N/A	41.06	66.5771	66.1987	58.02	49.3683	182.056								60.3202	52.1987	50.102	4.23461		0.0967969	0.0767583	0.0718732	0.00136587		#N/A	#N/A	#N/A	#N/A
2015-07-14	11:03:10	00:00:05	12.4167	0.206944	26.13	#N/A	41.21	76.9165	71.6553	50.9521	38.6505	182.111								70.6596	57.6553	43.0341	-6.48319		0.124758	0.0900296	0.0563164	0		#N/A	#N/A	#N/A	#N/A
2015-07-14	11:03:15	00:00:05	12.5	0.208333	26.12	#N/A	41.1	69.1528	81.9824	53.8452	57.7576	182.167								62.8959	67.9824	45.9272	12.6239		0.103512	0.117264	0.0625114	0.00787615		#N/A	#N/A	#N/A	#N/A
2015-07-14	11:03:20	00:00:05	12.5833	0.209722	26.12	#N/A	41.11	69.8242	78.3569	53.8452	52.6978	182.222								63.5673	64.3569	45.9272	7.56411		0.10529	0.107395	0.0625114	0.00346359		#N/A	#N/A	#N/A	#N/A
2015-07-14	11:03:25	00:00:05	12.6667	0.211111	26.12	#N/A	41.2	76.1719	82.7271	59.1187	46.4417	182.278								69.915	68.7271	51.2007	1.30801		0.122656	0.119331	0.074418	0.000207512		#N/A	#N/A	#N/A	#N/A
2015-07-14	11:03:30	00:00:05	12.75	0.2125	26.12	#N/A	41.17	73.9746	76.9531	60.8276	25.972	182.333								67.7177	62.9531	52.9096	-19.1617		0.116532	0.103663	0.078442	0		#N/A	#N/A	#N/A	#N/A
2015-07-14	11:03:35	00:00:05	12.8333	0.213889	26.12	#N/A	41.22	77.6733	80.5054	71.6309	62.6648	182.389								71.4164	66.5054	63.7129	17.5311		0.126909	0.113204	0.105677	0.0133374		#N/A	#N/A	#N/A	#N/A
2015-07-14	11:03:40	00:00:05	12.9167	0.215278	26.12	#N/A	41.26	80.7861	81.2378	55.3711	69.8608	182.444								74.5292	67.2378	47.4531	24.7271		0.135897	0.11521	0.0658761	0.0231552		#N/A	#N/A	#N/A	#N/A
2015-07-14	11:03:45	00:00:05	13	0.216667	26.12	#N/A	41.21	76.9165	86.5845	48.6816	41.0187	182.5								70.6596	72.5845	40.7636	-4.11499		0.124758	0.130255	0.0516269	0		#N/A	#N/A	#N/A	#N/A
2015-07-14	11:03:50	00:00:05	13.0833	0.218056	26.12	#N/A	41.17	73.9746	60.1929	54.8584	46.7743	182.556								67.7177	46.1929	46.9404	1.64061		0.116532	0.0630925	0.0647382	0.000298447		#N/A	#N/A	#N/A	#N/A
2015-07-14	11:03:55	00:00:05	13.1667	0.219444	26.12	#N/A	41.31	84.9121	73.5962	60.8276	52.3163	182.611								78.6552	59.5962	52.9096	7.18261		0.148165	0.0949401	0.078442	0.00318769		#N/A	#N/A	#N/A	#N/A
2015-07-14	11:04:00	00:00:05	13.25	0.220833	26.12	#N/A	41.26	80.7861	79.7852	60.2539	38.7848	182.667								74.5292	65.7852	52.3359	-6.34889		0.135897	0.111244	0.0770822	0		#N/A	#N/A	#N/A	#N/A
2015-07-14	11:04:05	00:00:05	13.3333	0.222222	26.12	#N/A	41.28	82.4097	78.3569	52.3804	59.7107	182.722								76.1528	64.3569	44.4624	14.577		0.140677	0.107395	0.0593444	0.00992027		#N/A	#N/A	#N/A	#N/A
2015-07-14	11:04:10	00:00:05	13.4167	0.223611	26.12	#N/A	41.24	79.2114	71.6553	51.8921	36.9461	182.778								72.9545	57.6553	43.9741	-8.18759		0.131321	0.0900296	0.0583025	0		#N/A	#N/A	#N/A	#N/A
2015-07-14	11:04:15	00:00:05	13.5	0.225	26.12	#N/A	41.18	74.6948	85.791	54.3457	59.491	182.833								68.4379	71.791	46.4277	14.3573		0.118526	0.127978	0.0636077	0.00968154		#N/A	#N/A	#N/A	#N/A
2015-07-14	11:04:20	00:00:05	13.5833	0.226389	26.12	#N/A	41.23	78.4424	83.4839	43.7134	52.3163	182.889								72.1855	69.4839	35.7954	7.18261		0.129108	0.121446	0.041912	0.00318769		#N/A	#N/A	#N/A	#N/A
2015-07-14	11:04:25	00:00:05	13.6667	0.227778	26.12	#N/A	41.17	73.9746	93.2007	52.8564	57.5439	182.944								67.7177	79.2007	44.9384	12.4102		0.116532	0.149817	0.0603668	0.00766339		#N/A	#N/A	#N/A	#N/A
2015-07-14	11:04:30	00:00:05	13.75	0.229167	26.12	#N/A	41.14	71.8628	79.0649	46.5332	49.9054	183								65.6059	65.0649	38.6152	4.77171		0.110758	0.109297	0.0473325	0.00165422		#N/A	#N/A	#N/A	#N/A
2015-07-14	11:04:35	00:00:05	13.8333	0.230556	26.12	#N/A	41.15	72.5586	69.7876	49.1272	66.0278	183.056								66.3017	55.7876	41.2092	20.8941		0.112648	0.0853976	0.0525351	0.0176733		#N/A	#N/A	#N/A	#N/A
2015-07-14	11:04:40	00:00:05	13.9167	0.231944	26.13	#N/A	41.11	69.8242	73.5962	42.5659	58.8318	183.111								63.5673	59.5962	34.6479	13.6981		0.10529	0.0949401	0.0397778	0.00897848		#N/A	#N/A	#N/A	#N/A
2015-07-14	11:04:45	00:00:05	14	0.233333	26.12	#N/A	41.11	69.8242	77.6489	55.3711	50.2686	183.167								63.5673	63.6489	47.4531	5.13491		0.10529	0.105507	0.0658761	0.00186077		#N/A	#N/A	#N/A	#N/A
2015-07-14	11:04:50	00:00:05	14.0833	0.234722	26.12	#N/A	41.04	65.332	86.5845	48.2422	51.1871	183.222								59.0751	72.5845	40.3242	6.05341		0.093612	0.130255	0.0507372	0.00242285		#N/A	#N/A	#N/A	#N/A
2015-07-14	11:04:55	00:00:05	14.1667	0.236111	26.12	#N/A	41.02	64.1113	88.1836	59.6802	60.6018	183.278								57.8544	74.1836	51.7622	15.4681		0.0905287	0.134888	0.0757314	0.0109108		#N/A	#N/A	#N/A	#N/A
2015-07-14	11:05:00	00:00:05	14.25	0.2375	26.13	#N/A	40.93	58.9722	76.9531	52.3804	60.8276	183.333								52.7153	62.9531	44.4624	15.6939		0.0779804	0.103663	0.0593444	0.0111674		#N/A	#N/A	#N/A	#N/A
2015-07-14	11:05:05	00:00:05	14.3333	0.238889	26.12	#N/A	40.9	57.373	70.3979	56.4087	47.2809	183.389								51.1161	56.3979	48.4907	2.14721		0.0742208	0.0869011	0.0682017	0.000459543		#N/A	#N/A	#N/A	#N/A
2015-07-14	11:05:10	00:00:05	14.4167	0.240278	26.12	#N/A	40.86	55.3345	74.9146	65.6494	35.2066	183.444								49.0776	60.9146	57.7314	-9.92709		0.0695306	0.0983314	0.0902203	0		#N/A	#N/A	#N/A	#N/A
2015-07-14	11:05:15	00:00:05	14.5	0.241667	26.13	#N/A	40.89	56.8604	75.5859	50.9521	61.2793	183.5								50.6035	61.5859	43.0341	16.1456		0.0730305	0.100075	0.0563164	0.0116874		#N/A	#N/A	#N/A	#N/A
2015-07-14	11:05:20	00:00:05	14.5833	0.243056	26.13	#N/A	40.81	52.8931	85.791	38.3301	44.4946	183.556								46.6362	71.791	30.4121	-0.639091		0.0640665	0.127978	0.0322705	0		#N/A	#N/A	#N/A	#N/A
2015-07-14	11:05:25	00:00:05	14.6667	0.244444	26.12	#N/A	40.76	50.5981	95.8252	44.8914	50.4517	183.611								44.3412	81.8252	36.9734	5.31801		0.0590851	0.157859	0.0441463	0.00196834		#N/A	#N/A	#N/A	#N/A
2015-07-14	11:05:30	00:00:05	14.75	0.245833	26.12	#N/A	40.74	49.7131	84.2407	43.7134	61.0535	183.667								43.4562	70.2407	35.7954	15.9198		0.057205	0.123574	0.041912	0.0114264		#N/A	#N/A	#N/A	#N/A
2015-07-14	11:05:35	00:00:05	14.8333	0.247222	26.12	#N/A	40.7	47.998	74.9146	38.0005	55.6702	183.722								41.7411	60.9146	30.0825	10.5365		0.053627	0.0983314	0.0317114	0.00589393		#N/A	#N/A	#N/A	#N/A
2015-07-14	11:05:40	00:00:05	14.9167	0.248611	26.13	#N/A	40.62	44.7937	66.1987	38.6597	45.6177	183.778								38.5368	52.1987	30.7417	0.484009		0.0471784	0.0767583	0.0328333	4.21215e-05		#N/A	#N/A	#N/A	#N/A
2015-07-14	11:05:45	00:00:05	15	0.25	26.13	#N/A	40.72	48.8464	89.0015	48.2422	40.7318	183.833								42.5895	75.0015	40.3242	-4.40189		0.055386	0.137281	0.0507372	0		#N/A	#N/A	#N/A	#N/A
2015-07-14	11:05:50	00:00:05	15.0833	0.251389	26.12	#N/A	40.68	47.168	85.0098	51.8921	57.5439	183.889								40.9111	71.0098	43.9741	12.4102		0.0519269	0.125752	0.0583025	0.00766339		#N/A	#N/A	#N/A	#N/A
2015-07-14	11:05:55	00:00:05	15.1667	0.252778	26.12	#N/A	40.67	46.7651	82.7271	54.8584	42.041	183.944								40.5082	68.7271	46.9404	-3.09269		0.051109	0.119331	0.0647382	0		#N/A	#N/A	#N/A	#N/A
2015-07-14	11:06:00	00:00:05	15.25	0.254167	26.12	#N/A	40.64	45.5688	85.0098	49.1272	52.3163	184								39.3119	71.0098	41.2092	7.18261		0.0487097	0.125752	0.0525351	0.00318769		#N/A	#N/A	#N/A	#N/A
2015-07-14	11:06:05	00:00:05	15.3333	0.255556	26.12	#N/A	40.69	47.583	83.4839	58.5693	57.9712	184.056								41.3261	69.4839	50.6513	12.8375		0.0527743	0.121446	0.0731413	0.008091		#N/A	#N/A	#N/A	#N/A
2015-07-14	11:06:10	00:00:05	15.4167	0.256944	26.12	#N/A	40.68	47.168	82.7271	37.677	51.1871	184.111								40.9111	68.7271	29.759	6.05341		0.0519269	0.119331	0.0311661	0.00242285		#N/A	#N/A	#N/A	#N/A
2015-07-14	11:06:15	00:00:05	15.5	0.258333	26.12	#N/A	40.73	49.2798	92.3462	30.0354	61.0535	184.167								43.0229	78.3462	22.1174	15.9198		0.0562928	0.147233	0.0193621	0.0114264		#N/A	#N/A	#N/A	#N/A
2015-07-14	11:06:20	00:00:05	15.5833	0.259722	26.12	#N/A	40.81	52.8931	84.2407	58.02	54.8584	184.222								46.6362	70.2407	50.102	9.72471		0.0640665	0.123574	0.0718732	0.00518267		#N/A	#N/A	#N/A	#N/A
2015-07-14	11:06:25	00:00:05	15.6667	0.261111	26.13	#N/A	40.85	54.834	89.0015	60.8276	56.7017	184.278								48.5771	75.0015	52.9096	11.568		0.0683967	0.137281	0.078442	0.00684646		#N/A	#N/A	#N/A	#N/A
2015-07-14	11:06:30	00:00:05	15.75	0.2625	26.13	#N/A	40.88	56.3416	84.2407	59.1187	63.1348	184.333								50.0847	70.2407	51.2007	18.0011		0.0718333	0.123574	0.074418	0.0139155		#N/A	#N/A	#N/A	#N/A
2015-07-14	11:06:35	00:00:05	15.8333	0.263889	26.13	#N/A	40.81	52.8931	93.2007	64.4043	55.8746	184.389								46.6362	79.2007	56.4863	10.7409		0.0640665	0.149817	0.0871196	0.0060784		#N/A	#N/A	#N/A	#N/A
2015-07-14	11:06:40	00:00:05	15.9167	0.265278	26.13	#N/A	40.84	54.3396	87.3779	46.5332	51.7487	184.444								48.0827	73.3779	38.6152	6.61501		0.0672836	0.132546	0.0473325	0.00279338		#N/A	#N/A	#N/A	#N/A
2015-07-14	11:06:45	00:00:05	16	0.266667	26.13	#N/A	40.86	55.3345	87.3779	41.0889	51.9348	184.5								49.0776	73.3779	33.1709	6.80111		0.0695306	0.132546	0.0370932	0.0029205		#N/A	#N/A	#N/A	#N/A
2015-07-14	11:06:50	00:00:05	16.0833	0.268056	26.13	#N/A	40.88	56.3416	98.5352	41.4551	49.3683	184.556								50.0847	84.5352	33.5371	4.23461		0.0718333	0.166329	0.0377522	0.00136587		#N/A	#N/A	#N/A	#N/A
2015-07-14	11:06:55	00:00:05	16.1667	0.269444	26.13	#N/A	40.9	57.373	84.2407	34.3079	48.3093	184.611								51.1161	70.2407	26.3899	3.17561		0.0742208	0.123574	0.0257031	0.000860855		#N/A	#N/A	#N/A	#N/A
2015-07-14	11:07:00	00:00:05	16.25	0.270833	26.13	#N/A	40.73	49.2798	74.9146	32.6233	63.8428	184.667								43.0229	60.9146	24.7053	18.7091		0.0562928	0.0983314	0.0231225	0.0148038		#N/A	#N/A	#N/A	#N/A
2015-07-14	11:07:05	00:00:05	16.3333	0.272222	26.13	#N/A	40.62	44.7937	85.0098	30.5359	57.9712	184.722								38.5368	71.0098	22.6179	12.8375		0.0471784	0.125752	0.0200697	0.008091		#N/A	#N/A	#N/A	#N/A
2015-07-14	11:07:10	00:00:05	16.4167	0.273611	26.13	#N/A	40.87	55.835	71.6553	25.7813	57.3303	184.778								49.5781	57.6553	17.8633	12.1966		0.0706714	0.0900296	0.013745	0.00745293		#N/A	#N/A	#N/A	#N/A
2015-07-14	11:07:15	00:00:05	16.5	0.275	26.13	#N/A	40.85	54.834	88.1836	36.7188	42.041	184.833								48.5771	74.1836	28.8008	-3.09269		0.0683967	0.134888	0.0295722	0		#N/A	#N/A	#N/A	#N/A
2015-07-14	11:07:20	00:00:05	16.5833	0.276389	26.13	#N/A	40.81	52.8931	85.791	27.9236	46.7743	184.889								46.6362	71.791	20.0056	1.64061		0.0640665	0.127978	0.0164834	0.000298447		#N/A	#N/A	#N/A	#N/A
2015-07-14	11:07:25	00:00:05	16.6667	0.277778	26.13	#N/A	40.82	53.3691	89.0015	31.8176	45.2942	184.944								47.1122	75.0015	23.8996	0.160509		0.0651186	0.137281	0.0219249	7.17168e-06		#N/A	#N/A	#N/A	#N/A
2015-07-14	11:07:30	00:00:05	16.75	0.279167	26.13	#N/A	40.77	51.0498	92.3462	31.2988	63.6047	185								44.7929	78.3462	23.3808	18.471		0.0600535	0.147233	0.0211665	0.0145027		#N/A	#N/A	#N/A	#N/A
2015-07-14	11:07:35	00:00:05	16.8333	0.280556	26.13	#N/A	40.76	50.5981	81.2378	21.7438	81.665	185.056								44.3412	67.2378	13.8258	36.5313		0.0590851	0.11521	0.00911311	0.0433026		#N/A	#N/A	#N/A	#N/A
2015-07-14	11:07:40	00:00:05	16.9167	0.281944	26.13	#N/A	40.76	50.5981	80.5054	28.3752	56.2866	185.111								44.3412	66.5054	20.4572	11.1529		0.0590851	0.113204	0.0170843	0.00645669		#N/A	#N/A	#N/A	#N/A
2015-07-14	11:07:45	00:00:05	17	0.283333	26.13	#N/A	40.76	50.5981	96.7285	26.6113	59.2712	185.167								44.3412	82.7285	18.6933	14.1375		0.0590851	0.160664	0.0147837	0.0094449		#N/A	#N/A	#N/A	#N/A
2015-07-14	11:07:50	00:00:05	17.0833	0.284722	26.13	#N/A	40.77	51.0498	99.4629	31.2988	70.1294	185.222								44.7929	85.4629	23.3808	24.9957		0.0600535	0.169266	0.0211665	0.02356		#N/A	#N/A	#N/A	#N/A
2015-07-14	11:07:55	00:00:05	17.1667	0.286111	26.13	#N/A	40.68	47.168	90.6494	40.0269	38.9206	185.278								40.9111	76.6494	32.1089	-6.21309		0.0519269	0.142151	0.0352068	0		#N/A	#N/A	#N/A	#N/A
2015-07-14	11:08:00	00:00:05	17.25	0.2875	26.13	#N/A	40.59	43.6584	83.4839	28.6072	48.4863	185.333								37.4015	69.4839	20.6892	3.35261		0.0449689	0.121446	0.0173961	0.000939104		#N/A	#N/A	#N/A	#N/A
2015-07-14	11:08:05	00:00:05	17.3333	0.288889	26.13	#N/A	40.62	44.7937	91.4917	17.8009	55.8746	185.389								38.5368	77.4917	9.8829	10.7409		0.0471784	0.144665	0.00531856	0.0060784		#N/A	#N/A	#N/A	#N/A
2015-07-14	11:08:10	00:00:05	17.4167	0.290278	26.13	#N/A	40.55	42.2058	103.271	31.8176	72.2839	185.444								35.9489	89.271	23.8996	27.1502		0.0422006	0.181526	0.0219249	0.0269012		#N/A	#N/A	#N/A	#N/A
2015-07-14	11:08:15	00:00:05	17.5	0.291667	26.13	#N/A	40.45	38.8245	79.0649	30.2856	64.3219	185.5								32.5676	65.0649	22.3676	19.1882		0.036017	0.109297	0.0197146	0.0154165		#N/A	#N/A	#N/A	#N/A
2015-07-14	11:08:20	00:00:05	17.5833	0.293056	26.13	#N/A	40.5	40.4663	88.1836	26.4038	64.0808	185.556								34.2094	74.1836	18.4858	18.9471		0.0389734	0.134888	0.0145214	0.015107		#N/A	#N/A	#N/A	#N/A
2015-07-14	11:08:25	00:00:05	17.6667	0.294444	26.13	#N/A	40.48	39.801	93.2007	31.8176	64.563	185.611								33.5441	79.2007	23.8996	19.4293		0.0377648	0.149817	0.0219249	0.0157284		#N/A	#N/A	#N/A	#N/A
2015-07-14	11:08:30	00:00:05	17.75	0.295833	26.13	#N/A	40.42	37.8784	94.9463	27.2583	55.2612	185.667								31.6215	80.9463	19.3403	10.1275		0.0343535	0.155148	0.015613	0.00553128		#N/A	#N/A	#N/A	#N/A
2015-07-14	11:08:35	00:00:05	17.8333	0.297222	26.13	#N/A	40.39	36.9629	101.343	19.577	62.8967	185.722								30.706	87.343	11.659	17.763		0.0327721	0.175279	0.00693304	0.0136215		#N/A	#N/A	#N/A	#N/A
2015-07-14	11:08:40	00:00:05	17.9167	0.298611	26.13	#N/A	40.41	37.5671	85.791	23.2941	60.8276	185.778								31.3102	71.791	15.3761	15.6939		0.0338126	0.127978	0.0108069	0.0111674		#N/A	#N/A	#N/A	#N/A
2015-07-14	11:08:45	00:00:05	18	0.3	26.13	#N/A	40.18	31.2683	98.5352	19.577	68.8171	185.833								25.0114	84.5352	11.659	23.6834		0.0235837	0.166329	0.00693304	0.0216077		#N/A	#N/A	#N/A	#N/A
2015-07-14	11:08:50	00:00:05	18.0833	0.301389	26.13	#N/A	40.22	32.2632	94.0674	21.2555	67.5354	185.889								26.0063	80.0674	13.3375	22.4017		0.0251064	0.152455	0.00860238	0.0197629		#N/A	#N/A	#N/A	#N/A
2015-07-14	11:08:55	00:00:05	18.1667	0.302778	26.13	#N/A	40.18	31.2683	98.5352	38.3301	61.969	185.944								25.0114	84.5352	30.4121	16.8353		0.0235837	0.166329	0.0322705	0.0124985		#N/A	#N/A	#N/A	#N/A
2015-07-14	11:09:00	00:00:05	18.25	0.304167	26.13	#N/A	40.27	33.5632	99.4629	39.3372	66.2781	186								27.3063	85.4629	31.4192	21.1444		0.0271496	0.169266	0.0340017	0.0180141		#N/A	#N/A	#N/A	#N/A
2015-07-14	11:09:05	00:00:05	18.3333	0.305556	26.13	#N/A	40.24	32.7759	106.226	37.3535	73.1079	186.056								26.519	92.226	29.4355	27.9742		0.025905	0.19126	0.0306245	0.0282227		#N/A	#N/A	#N/A	#N/A
2015-07-14	11:09:10	00:00:05	18.4167	0.306944	26.13	#N/A	40.23	32.5195	110.303	16.452	70.6604	186.111								26.2626	96.303	8.534	25.5267		0.0255045	0.205002	0.00420308	0.0243679		#N/A	#N/A	#N/A	#N/A
2015-07-14	11:09:15	00:00:05	18.5	0.308333	26.13	#N/A	40.23	32.5195	104.248	19.4336	90.625	186.167								26.2626	90.248	11.5156	45.4913		0.0255045	0.184723	0.00679678	0.0615625		#N/A	#N/A	#N/A	#N/A
2015-07-14	11:09:20	00:00:05	18.5833	0.309722	26.13	#N/A	40.17	31.0272	108.252	21.0968	77.4048	186.222								24.7703	94.252	13.1788	32.2711		0.0232201	0.198044	0.00843879	0.0354925		#N/A	#N/A	#N/A	#N/A
2015-07-14	11:09:25	00:00:05	18.6667	0.311111	26.13	#N/A	40.15	30.5481	119.019	20.3186	87.5244	186.278								24.2912	105.019	12.4006	42.3907		0.0225039	0.235566	0.00765388	0.054972		#N/A	#N/A	#N/A	#N/A
2015-07-14	11:09:30	00:00:05	18.75	0.3125	26.13	#N/A	40.24	32.7759	101.343	16.3361	90.625	186.333								26.519	87.343	8.4181	45.4913		0.025905	0.175279	0.0041119	0.0615625		#N/A	#N/A	#N/A	#N/A
2015-07-14	11:09:35	00:00:05	18.8333	0.313889	26.13	#N/A	40.18	31.2683	114.575	42.5659	80.7251	186.389								25.0114	100.575	34.6479	35.5914		0.0235837	0.219783	0.0397778	0.0415295		#N/A	#N/A	#N/A	#N/A
2015-07-14	11:09:40	00:00:05	18.9167	0.315278	26.13	#N/A	40.12	29.8523	111.353	41.0889	75.0793	186.444								23.5954	97.353	33.1709	29.9456		0.021479	0.208599	0.0370932	0.0314802		#N/A	#N/A	#N/A	#N/A
2015-07-14	11:09:45	00:00:05	19	0.316667	26.13	#N/A	40.19	31.5125	113.501	25.9857	94.2139	186.5								25.2556	99.501	18.0677	49.0802		0.0239541	0.21603	0.0139982	0.0695366		#N/A	#N/A	#N/A	#N/A
2015-07-14	11:09:50	00:00:05	19.0833	0.318056	26.13	#N/A	40.14	30.3162	119.019	28.1494	121.143	186.556								24.0593	105.019	20.2314	76.0093		0.0221603	0.235566	0.0167828	0.140252		#N/A	#N/A	#N/A	#N/A
2015-07-14	11:09:55	00:00:05	19.1667	0.319444	26.13	#N/A	40.15	30.5481	105.225	17.0486	72.5586	186.611								24.2912	91.225	9.1306	27.4249		0.0225039	0.187941	0.00468425	0.0273391		#N/A	#N/A	#N/A	#N/A
2015-07-14	11:10:00	00:00:05	19.25	0.320833	26.13	#N/A	39.94	26.059	107.227	21.9086	110.181	186.667								19.8021	93.227	13.9906	65.0473		0.0162152	0.194601	0.00928797	0.109249		#N/A	#N/A	#N/A	#N/A
2015-07-14	11:10:05	00:00:05	19.3333	0.322222	26.13	#N/A	39.97	26.6479	104.248	25.7813	96.4417	186.722								20.391	90.248	17.8633	51.308		0.0169956	0.184723	0.013745	0.0746683		#N/A	#N/A	#N/A	#N/A
2015-07-14	11:10:10	00:00:05	19.4167	0.323611	26.13	#N/A	39.96	26.4496	97.6318	37.0361	87.8601	186.778								20.1927	83.6318	29.1181	42.7264		0.0167313	0.163487	0.0300966	0.0556719		#N/A	#N/A	#N/A	#N/A
2015-07-14	11:10:15	00:00:05	19.5	0.325	26.13	#N/A	39.89	25.116	104.248	20.0195	100.671	186.833								18.8591	90.248	12.1015	55.5373		0.0149946	0.184723	0.00735992	0.0847839		#N/A	#N/A	#N/A	#N/A
2015-07-14	11:10:20	00:00:05	19.5833	0.326389	26.13	#N/A	39.93	25.8667	95.8252	20.0195	81.3477	186.889								19.6098	81.8252	12.1015	36.214		0.0159634	0.157859	0.00735992	0.0427009		#N/A	#N/A	#N/A	#N/A
2015-07-14	11:10:25	00:00:05	19.6667	0.327778	26.13	#N/A	39.88	24.9329	99.4629	22.5891	84.2102	186.944								18.676	85.4629	14.6711	39.0765		0.0147617	0.169266	0.0100232	0.0482428		#N/A	#N/A	#N/A	#N/A
2015-07-14	11:10:30	00:00:05	19.75	0.329167	26.13	#N/A	39.81	23.6969	97.6318	27.6978	93.4814	187								17.44	83.6318	19.7798	48.3477		0.0132263	0.163487	0.016186	0.0678794		#N/A	#N/A	#N/A	#N/A
2015-07-14	11:10:35	00:00:05	19.8333	0.330556	26.13	#N/A	39.93	25.8667	90.6494	20.9381	108.887	187.056								19.6098	76.6494	13.0201	63.7533		0.0159634	0.142151	0.00827638	0.105784		#N/A	#N/A	#N/A	#N/A
2015-07-14	11:10:40	00:00:05	19.9167	0.331944	26.13	#N/A	39.85	24.3927	87.3779	23.114	105.103	187.111								18.1358	73.3779	15.196	59.9693		0.0140829	0.132546	0.0106046	0.0958953		#N/A	#N/A	#N/A	#N/A
2015-07-14	11:10:45	00:00:05	20	0.333333	26.13	26.1239	39.84	24.2188	99.4629	36.7188	114.618	187.167								17.9619	85.4629	28.8008	69.4843		0.0138669	0.169266	0.0295722	0.121447		0.0577605	0.0813284	0.0422314	0.120643
2015-07-14	11:10:50	00:00:05	20.0833	0.334722	26.13	26.1239	39.76	22.8607	87.3779	43.3228	106.769	187.222								16.6038	73.3779	35.4048	61.6353		0.0122239	0.132546	0.0411808	0.100204		0.0577851	0.0817445	0.0423705	0.119231
2015-07-14	11:10:55	00:00:05	20.1667	0.336111	26.13	26.1239	39.78	23.1903	94.0674	33.1726	108.038	187.278								16.9334	80.0674	25.2546	62.9043		0.0126155	0.152455	0.0239526	0.103534		0.0578095	0.0823066	0.0424499	0.117832
2015-07-14	11:11:00	00:00:05	20.25	0.3375	26.13	26.1239	39.77	23.0255	89.0015	23.8403	101.862	187.333								16.7686	75.0015	15.9223	56.7283		0.0124191	0.137281	0.0114292	0.0877191		0.0578419	0.0828643	0.0424078	0.116367
2015-07-14	11:11:05	00:00:05	20.3333	0.338889	26.13	26.1239	39.71	22.0642	90.6494	24.5941	95.3186	187.389								15.8073	76.6494	16.6761	50.1849		0.0112971	0.142151	0.0123095	0.072064		0.0578749	0.0833482	0.0424246	0.114838
2015-07-14	11:11:10	00:00:05	20.4167	0.340278	26.13	26.1239	39.65	21.1517	77.6489	25.9857	84.8633	187.444								14.8948	63.6489	18.0677	39.7296		0.0102694	0.105507	0.0139982	0.0495426		0.057906	0.0837354	0.0423899	0.113214
2015-07-14	11:11:15	00:00:05	20.5	0.341667	26.13	26.124	39.57	20.0104	86.5845	22.0764	64.0808	187.5								13.7535	72.5845	14.1584	18.9471		0.00903676	0.130255	0.0094673	0.015107		0.0579347	0.084123	0.0423843	0.111447
2015-07-14	11:11:20	00:00:05	20.5833	0.343056	26.13	26.124	39.53	19.4702	88.1836	16.2201	66.5283	187.556								13.2133	74.1836	8.3021	21.3946		0.00847422	0.134888	0.0040214	0.0183572		0.0579626	0.0845724	0.0423659	0.109693
2015-07-14	11:11:25	00:00:05	20.6667	0.344444	26.13	26.124	39.51	19.2047	80.5054	14.5081	76.2329	187.611								12.9478	66.5054	6.5901	31.0992		0.00820276	0.113204	0.00277653	0.0334479		0.0579853	0.0849882	0.0423514	0.108002
2015-07-14	11:11:30	00:00:05	20.75	0.345833	26.13	26.124	39.33	17.0273	99.4629	26.6113	72.0093	187.667								10.7704	85.4629	18.6933	26.8756		0.00610516	0.169266	0.0147837	0.0264661		0.0580051	0.0855829	0.0423308	0.106283
2015-07-14	11:11:35	00:00:05	20.8333	0.347222	26.13	26.124	39.34	17.1387	98.5352	28.6072	73.6633	187.722								10.8818	84.5352	20.6892	28.5296		0.00620677	0.166329	0.0173961	0.0291269		0.0580231	0.0861319	0.04236	0.104574
2015-07-14	11:11:40	00:00:05	20.9167	0.348611	26.13	26.124	39.25	16.1606	80.5054	31.0425	67.5354	187.778								9.90367	66.5054	23.1245	22.4017		0.0053365	0.113204	0.0207956	0.0197629		0.0580426	0.0863956	0.0423904	0.102826
2015-07-14	11:11:45	00:00:05	21	0.35	26.13	26.124	39.16	15.2527	92.3462	24.2126	79.4983	187.833								8.99577	78.3462	16.2946	34.3646		0.0045738	0.147233	0.0118609	0.0392574		0.0580533	0.0869233	0.0423904	0.101159
2015-07-14	11:11:50	00:00:05	21.0833	0.351389	26.13	26.124	39.35	17.2531	77.6489	28.8391	63.8428	187.889								10.9962	63.6489	20.9211	18.7091		0.00631176	0.105507	0.0177099	0.0148038		0.0580715	0.0872605	0.0423626	0.099391
2015-07-14	11:11:55	00:00:05	21.1667	0.352778	26.13	26.1241	39.28	16.4795	89.0015	30.0354	78.894	187.944								10.2226	75.0015	22.1174	33.7603		0.00561479	0.137281	0.0193621	0.038156		0.0580909	0.0877823	0.0423088	0.0977199
2015-07-14	11:12:00	00:00:05	21.25	0.354167	26.13	26.1241	39.11	14.7766	67.9688	15.9927	77.1057	188								8.51967	53.9688	8.0747	31.972		0.00419177	0.080976	0.00384618	0.0349663		0.0581044	0.0879835	0.0421729	0.0960355
2015-07-14	11:12:05	00:00:05	21.3333	0.355556	26.13	26.1242	39.08	14.4989	85.0098	13.829	65.5396	188.056								8.24197	71.0098	5.911	20.4059		0.00397478	0.125752	0.00233208	0.0170156		0.0581074	0.0883495	0.0421537	0.0942762
2015-07-14	11:12:10	00:00:05	21.4167	0.356944	26.13	26.1242	39.38	17.5995	92.3462	18.4601	74.7925	188.111								11.3426	78.3462	10.5421	29.6588		0.00663371	0.147233	0.00589895	0.030998		0.058133	0.0888216	0.042039	0.0925753
2015-07-14	11:12:15	00:00:05	21.5	0.358333	26.13	26.1242	39.22	15.8508	67.3706	20.7794	90.625	188.167								9.59387	53.3706	12.8614	45.4913		0.00507128	0.0795411	0.00811517	0.0615625		0.058151	0.0890799	0.0419209	0.0910017
2015-07-14	11:12:20	00:00:05	21.5833	0.359722	26.13	26.1242	39.22	15.8508	71.0205	24.0265	82.2937	188.222								9.59387	57.0205	16.1085	37.16		0.00507128	0.088445	0.0116444	0.0445042		0.0581707	0.0894091	0.0419285	0.089357
2015-07-14	11:12:25	00:00:05	21.6667	0.361111	26.13	26.1242	39.06	14.3188	66.1987	15.4419	85.5225	188.278								8.06187	52.1987	7.5239	40.3888		0.00383639	0.0767583	0.00343411	0.0508677		0.0581799	0.0896361	0.0417556	0.0877388
2015-07-14	11:12:30	00:00:05	21.75	0.3625	26.13	26.1243	39.09	14.5905	57.1899	16.568	68.042	188.333								8.33357	43.1899	8.65	22.9083		0.00404587	0.0566438	0.0042951	0.0204846		0.058193	0.0897307	0.0417599	0.0859941
2015-07-14	11:12:35	00:00:05	21.8333	0.363889	26.13	26.1243	39.22	15.8508	67.3706	20.0195	76.5198	188.389								9.59387	53.3706	12.1015	31.3861		0.00507128	0.0795411	0.00735992	0.0339442		0.0582122	0.0900001	0.0417278	0.0843054
2015-07-14	11:12:40	00:00:05	21.9167	0.365278	26.13	26.1243	39.22	15.8508	92.3462	15.9927	69.5984	188.444								9.59387	78.3462	8.0747	24.4647		0.00507128	0.147233	0.00384618	0.0227624		0.0582323	0.0905327	0.0416646	0.0825701
2015-07-14	11:12:45	00:00:05	22	0.366667	26.13	26.1244	38.92	13.1302	73.5962	20.9381	75.3662	188.5								6.87327	59.5962	13.0201	30.2325		0.00297036	0.0949401	0.00827638	0.0319654		0.0582416	0.090907	0.0416652	0.0808732
2015-07-14	11:12:50	00:00:05	22.0833	0.368056	26.13	26.1244	38.98	13.623	69.7876	18.7317	72.5586	188.556								7.36607	55.7876	10.8137	27.4249		0.00331929	0.0853976	0.00614461	0.0273391		0.0582545	0.0912443	0.0416057	0.079157
2015-07-14	11:12:55	00:00:05	22.1667	0.369444	26.13	26.1245	39.24	16.0568	79.0649	21.9086	71.7346	188.611								9.79987	65.0649	13.9906	26.6009		0.00524707	0.109297	0.00928797	0.0260335		0.058268	0.0916462	0.0416002	0.0774353
2015-07-14	11:13:00	00:00:05	22.25	0.370833	26.13	26.1245	39.07	14.4089	69.165	14.6088	66.2781	188.667								8.15197	55.165	6.6908	21.1444		0.00390539	0.0838741	0.00284489	0.0180141		0.0582812	0.0919486	0.0415653	0.0756803
2015-07-14	11:13:05	00:00:05	22.3333	0.372222	26.13	26.1245	39.31	16.806	77.6489	25.1801	72.2839	188.722								10.5491	63.6489	17.2621	27.1502		0.0059052	0.105507	0.0130106	0.0269012		0.0583054	0.0922972	0.0415929	0.0741931
2015-07-14	11:13:10	00:00:05	22.4167	0.373611	26.13	26.1245	39.3	16.6962	74.9146	22.4152	60.376	188.778								10.4393	60.9146	14.4972	15.2423		0.00580692	0.0983314	0.00983329	0.0106565		0.0583292	0.092592	0.0415959	0.0730485
2015-07-14	11:13:15	00:00:05	22.5	0.375	26.13	26.1245	39.23	15.9531	72.937	25.7813	68.8171	188.833								9.69617	58.937	17.8633	23.6834		0.00515829	0.0932613	0.013745	0.0216077		0.0583475	0.0929259	0.0415479	0.0717084
2015-07-14	11:13:20	00:00:05	22.5833	0.376389	26.13	26.1245	39.41	17.9535	59.1675	18.5944	68.042	188.889								11.6966	45.1675	10.6764	22.9083		0.00696891	0.0608612	0.00601995	0.0204846		0.0583747	0.0931335	0.0414732	0.0699637
2015-07-14	11:13:25	00:00:05	22.6667	0.377778	26.13	26.1245	39.37	17.4835	67.3706	17.6727	54.0619	188.944								11.2266	53.3706	9.7547	8.92821		0.00652523	0.0795411	0.00520833	0.00451882		0.0583965	0.0933479	0.0413968	0.0681524
2015-07-14	11:13:30	00:00:05	22.75	0.379167	26.13	26.1245	39.31	16.806	78.3569	25.1801	50.6348	189								10.5491	64.3569	17.2621	5.50111		0.0059052	0.107395	0.0130106	0.00207817		0.0584167	0.0937627	0.0413824	0.0665202
2015-07-14	11:13:35	00:00:05	22.8333	0.380556	26.13	26.1245	39.29	16.5863	92.3462	17.0486	72.5586	189.056								10.3294	78.3462	9.1306	27.4249		0.00570918	0.147233	0.00468425	0.0273391		0.0584389	0.09424	0.0413661	0.0649794
2015-07-14	11:13:40	00:00:05	22.9167	0.381944	26.13	26.1245	39.67	21.4508	81.2378	15.6586	55.6702	189.111								15.1939	67.2378	7.7406	10.5365		0.0106022	0.11521	0.00359413	0.00589393		0.0584821	0.0946653	0.0413059	0.0631738
2015-07-14	11:13:45	00:00:05	23	0.383333	26.13	26.1245	39.54	19.603	67.9688	20.9381	52.3163	189.167								13.3461	53.9688	13.0201	7.18261		0.00861125	0.080976	0.00827638	0.00318769		0.058518	0.0949536	0.04129	0.061357
2015-07-14	11:13:50	00:00:05	23.0833	0.384722	26.13	26.1245	39.65	21.1517	63.9404	17.4194	65.0482	189.222								14.8948	49.9404	9.5014	19.9145		0.0102694	0.0715017	0.0049931	0.0163632		0.0585559	0.0950964	0.041211	0.059595
2015-07-14	11:13:55	00:00:05	23.1667	0.386111	26.13	26.1245	39.61	20.5719	67.9688	9.79309	61.0535	189.278								14.315	53.9688	1.87509	15.9198		0.00963579	0.080976	0.000369766	0.0114264		0.0585959	0.095398	0.0410286	0.0578268
2015-07-14	11:14:00	00:00:05	23.25	0.3875	26.13	26.1245	39.7	21.9086	58.667	11.7081	63.6047	189.333								15.6517	44.667	3.7901	18.471		0.0111192	0.0597831	0.00114329	0.0145027		0.0586413	0.0956384	0.0409282	0.0566768
2015-07-14	11:14:05	00:00:05	23.3333	0.388889	26.13	26.1245	39.64	21.0052	94.9463	20.9381	59.0515	189.389								14.7483	80.9463	13.0201	13.9178		0.0101079	0.155148	0.00827638	0.00921058		0.0586798	0.096253	0.0408663	0.0551159
2015-07-14	11:14:10	00:00:05	23.4167	0.390278	26.13	26.1246	39.63	20.8588	72.3022	20.7794	59.491	189.444								14.6019	58.3022	12.8614	14.3573		0.00994742	0.0916554	0.00811517	0.00968154		0.0587145	0.0966136	0.0407703	0.0536758
2015-07-14	11:14:15	00:00:05	23.5	0.391667	26.13	26.1246	39.61	20.5719	56.2317	21.0968	50.6348	189.5								14.315	42.2317	13.1788	5.50111		0.00963579	0.0546416	0.00843879	0.00207817		0.0587534	0.0968355	0.0406481	0.0518544
2015-07-14	11:14:20	00:00:05	23.5833	0.393056	26.13	26.1247	39.7	21.9086	75.5859	17.4194	61.969	189.556								15.6517	61.5859	9.5014	16.8353		0.0111192	0.100075	0.0049931	0.0124985		0.0587978	0.0972425	0.0405743	0.0500763
2015-07-14	11:14:25	00:00:05	23.6667	0.394444	26.13	26.1247	39.22	15.8508	83.4839	35.1868	68.5608	189.611								9.59387	69.4839	27.2688	23.4271		0.00507128	0.121446	0.0270899	0.0212338		0.0588186	0.0976609	0.0406035	0.0483347
2015-07-14	11:14:30	00:00:05	23.75	0.395833	26.13	26.1248	38.97	13.5391	65.0635	14.3097	52.3163	189.667								7.28217	51.0635	6.3917	7.18261		0.00325886	0.0740984	0.00264367	0.00318769		0.0588312	0.097857	0.0404703	0.0465178
2015-07-14	11:14:35	00:00:05	23.8333	0.397222	26.13	26.1248	38.79	12.1384	58.1726	19.0094	63.3667	189.722								5.88147	44.1726	11.0914	18.233		0.00231342	0.0587252	0.00639967	0.0142042		0.0588395	0.0980847	0.0404007	0.0448508
2015-07-14	11:14:40	00:00:05	23.9167	0.398611	26.13	26.1248	38.12	8.30383	57.6782	12.587	56.0791	189.778								2.0469	43.6782	4.669	10.9454		0.000425597	0.0576745	0.00159748	0.00626509		0.0588356	0.0983124	0.0402101	0.0433314
2015-07-14	11:14:45	00:00:05	24	0.4	26.13	26.1249	38.52	10.3653	60.7117	24.0265	57.1228	189.833								4.10837	46.7117	16.1085	11.9891		0.00130114	0.064233	0.0116444	0.00725059		0.0588313	0.0985518	0.0401218	0.0418424
2015-07-14	11:14:50	00:00:05	24.0833	0.401389	26.13	26.1249	38.75	11.8515	52.5818	42.1875	48.3093	189.889								5.59457	38.5818	34.2695	3.17561		0.00213509	0.0472669	0.0390833	0.000860855		0.0588348	0.0986941	0.0400769	0.0403137
2015-07-14	11:14:55	00:00:05	24.1667	0.402778	26.13	26.125	38.11	8.25958	62.3047	36.4075	65.5396	189.944								2.00265	48.3047	28.4895	20.4059		0.000410936	0.0677826	0.0290612	0.0170156		0.0588234	0.0989354	0.0400612	0.0390033
2015-07-14	11:15:00	00:00:05	24.25	0.404167	26.13	26.125	37.89	7.35397	52.1484	27.2583	57.9712	190								1.09704	38.1484	19.3403	12.8375		0.000156501	0.0464181	0.015613	0.008091		0.0588112	0.0991181	0.0400668	0.0372069
2015-07-14	11:15:05	00:00:05	24.3333	0.405556	26.13	26.125	38.35	9.41772	74.2554	14.0198	61.7371	190.056								3.16079	60.2554	6.1018	16.6034		0.00085442	0.0966302	0.002454	0.0122235		0.0587898	0.0994938	0.0399699	0.0354277
2015-07-14	11:15:10	00:00:05	24.4167	0.406944	26.13	26.1251	38.74	11.7813	64.4958	15.77	55.2612	190.111								5.52437	50.4958	7.852	10.1275		0.00209228	0.0727815	0.00367746	0.00553128		0.0587777	0.0996037	0.0397981	0.0340573
2015-07-14	11:15:15	00:00:05	24.5	0.408333	26.13	26.1251	39.08	14.4989	72.937	19.577	51.9348	190.167								8.24197	58.937	11.659	6.80111		0.00397478	0.0932613	0.00693304	0.0029205		0.0587515	0.0999912	0.0396971	0.0328263
2015-07-14	11:15:20	00:00:05	24.5833	0.409722	26.13	26.1251	39.36	17.3676	62.8418	27.0386	46.7743	190.222								11.1107	48.8418	19.1206	1.64061		0.00641751	0.0689956	0.0153295	0.000298447		0.0587265	0.100217	0.0396845	0.0313725
2015-07-14	11:15:25	00:00:05	24.6667	0.411111	26.13	26.1251	39.45	18.4418	78.3569	19.4336	55.8746	190.278								12.1849	64.3569	11.5156	10.7409		0.00744142	0.107395	0.00679678	0.0060784		0.0586889	0.100601	0.0395382	0.0295677
2015-07-14	11:15:30	00:00:05	24.75	0.4125	26.13	26.1251	39.58	20.1477	56.7139	20.4712	55.4657	190.333								13.8908	42.7139	12.5532	10.332		0.00918189	0.0556458	0.00780551	0.00571152		0.0586481	0.10072	0.0393361	0.028315
2015-07-14	11:15:35	00:00:05	24.8333	0.413889	26.13	26.1252	39.76	22.8607	70.3979	16.9281	61.2793	190.389								16.6038	56.3979	9.0101	16.1456		0.0122239	0.0869011	0.00458549	0.0116874		0.0586053	0.100994	0.0391894	0.0274841
2015-07-14	11:15:40	00:00:05	24.9167	0.415278	26.13	26.1252	39.78	23.1903	63.3911	15.5502	57.1228	190.444								16.9334	49.3911	7.6322	11.9891		0.0126155	0.0702444	0.00351374	0.00725059		0.0585235	0.101217	0.0391025	0.0266013
2015-07-14	11:15:45	00:00:05	25	0.416667	26.13	26.1252	39.93	25.8667	52.1484	10.495	67.2791	190.5								19.6098	38.1484	2.577	22.1454		0.0159634	0.0464181	0.000615782	0.0194015		0.0584422	0.101408	0.0389775	0.0249559
2015-07-14	11:15:50	00:00:05	25.0833	0.418056	26.13	26.1252	39.82	23.8678	48.4192	21.579	50.2686	190.556								17.6109	34.4192	13.661	5.13491		0.0134348	0.0393575	0.0089395	0.00186077		0.0582819	0.101544	0.0389095	0.0242577
2015-07-14	11:15:55	00:00:05	25.1667	0.419444	26.13	26.1252	39.76	22.8607	63.3911	10.495	51.3733	190.611								16.6038	49.3911	2.577	6.23961		0.0122239	0.0702444	0.000615782	0.0025435		0.0581198	0.101754	0.0386073	0.0239424
2015-07-14	11:16:00	00:00:05	25.25	0.420833	26.13	26.1253	39.68	21.6003	65.625	18.0603	64.3219	190.667								15.3434	51.625	10.1423	19.1882		0.01077	0.0754096	0.00554424	0.0154165		0.0579062	0.102026	0.0384399	0.0226491
2015-07-14	11:16:05	00:00:05	25.3333	0.422222	26.13	26.1253	39.77	23.0255	66.7847	20.6238	47.2809	190.722								16.7686	52.7847	12.7058	2.14721		0.0124191	0.0781452	0.00795827	0.000459543		0.0576953	0.102284	0.0383158	0.02209
2015-07-14	11:16:10	00:00:05	25.4167	0.423611	26.13	26.1253	39.49	18.9468	48.4192	36.7188	44.812	190.778								12.6899	34.4192	28.8008	-0.321691		0.00794227	0.0393575	0.0295722	0		0.0574241	0.102185	0.0382348	0.0214754
2015-07-14	11:16:15	00:00:05	25.5	0.425	26.13	26.1253	39.62	20.7153	57.1899	21.2555	56.9092	190.833								14.4584	43.1899	13.3375	11.7755		0.00979108	0.0566438	0.00860238	0.00704451		0.0570877	0.102334	0.0380192	0.0211225
2015-07-14	11:16:20	00:00:05	25.5833	0.426389	26.13	26.1253	39.66	21.3013	52.5818	16.2201	53.2776	190.889								15.0444	38.5818	8.3021	8.14391		0.0104354	0.0472669	0.0040214	0.0038992		0.0566999	0.102428	0.0376793	0.0205543
2015-07-14	11:16:25	00:00:05	25.6667	0.427778	26.13	26.1253	39.57	20.0104	69.165	36.0962	54.0619	190.944								13.7535	55.165	28.1782	8.92821		0.00903676	0.0838741	0.0285536	0.00451882		0.056276	0.102688	0.0374657	0.0198104
2015-07-14	11:16:30	00:00:05	25.75	0.429167	26.13	26.1254	39.8	23.526	54.8279	41.4551	64.3219	191								17.2691	40.8279	33.5371	19.1882		0.013019	0.0517576	0.0377522	0.0154165		0.0558688	0.102862	0.0374685	0.0193739
2015-07-14	11:16:35	00:00:05	25.8333	0.430556	26.13	26.1254	40.11	29.6204	62.3047	27.2583	55.4657	191.056								23.3635	48.3047	19.3403	10.332		0.0211414	0.0677826	0.015613	0.00571152		0.0554281	0.103081	0.0373707	0.0188702
2015-07-14	11:16:40	00:00:05	25.9167	0.431944	26.13	26.1255	39.58	20.1477	56.7139	27.9236	57.9712	191.111								13.8908	42.7139	20.0056	12.8375		0.00918189	0.0556458	0.0164834	0.008091		0.0549284	0.10327	0.0370568	0.0182642
2015-07-14	11:16:45	00:00:05	26	0.433333	26.13	26.1255	39.88	24.9329	39.6545	37.0361	45.6177	191.167								18.676	25.6545	29.1181	0.484009		0.0147617	0.0245639	0.0300966	4.21215e-05		0.0544611	0.103272	0.0369917	0.0176498
2015-07-14	11:16:50	00:00:05	26.0833	0.434722	26.13	26.1255	40.15	30.5481	52.1484	18.5944	75.0793	191.222								24.2912	38.1484	10.6764	29.9456		0.0225039	0.0464181	0.00601995	0.0314802		0.0540438	0.103418	0.0368162	0.0173059
2015-07-14	11:16:55	00:00:05	26.1667	0.436111	26.13	26.1256	39.93	25.8667	65.0635	19.7235	81.665	191.278								19.6098	51.0635	11.8055	36.5313		0.0159634	0.0740984	0.00707331	0.0433026		0.0536165	0.103651	0.0365301	0.0171678
2015-07-14	11:17:00	00:00:05	26.25	0.4375	26.13	26.1256	40.02	27.6642	45.0073	32.6233	60.6018	191.333								21.4073	31.0073	24.7053	15.4681		0.0183747	0.0332895	0.0231225	0.0109108		0.0531642	0.103683	0.0363998	0.01699
2015-07-14	11:17:05	00:00:05	26.3333	0.438889	26.13	26.1257	39.67	21.4508	50.8667	30.5359	66.0278	191.389								15.1939	36.8667	22.6179	20.8941		0.0106022	0.0439421	0.0200697	0.0176733		0.0526886	0.10373	0.0363315	0.0165886
2015-07-14	11:17:10	00:00:05	26.4167	0.440278	26.13	26.1257	39.63	20.8588	49.6216	21.7438	62.6648	191.444								14.6019	35.6216	13.8258	17.5311		0.00994742	0.041586	0.00911311	0.0133374		0.0522102	0.103762	0.0361918	0.0164484
2015-07-14	11:17:15	00:00:05	26.5	0.441667	26.13	26.1258	39.59	20.2881	58.667	24.9817	63.3667	191.5								14.0312	44.667	17.0637	18.233		0.00933121	0.0597831	0.0127716	0.0142042		0.0517716	0.103905	0.0360224	0.0161662
2015-07-14	11:17:20	00:00:05	26.5833	0.443056	26.13	26.1258	39.69	21.7529	65.0635	17.1722	56.2866	191.556								15.496	51.0635	9.2542	11.1529		0.0109423	0.0740984	0.00478638	0.00645669		0.0512974	0.104103	0.0356979	0.0160295
2015-07-14	11:17:25	00:00:05	26.6667	0.444444	26.13	26.1258	39.64	21.0052	52.5818	9.09348	55.8746	191.611								14.7483	38.5818	1.17548	10.7409		0.0101079	0.0472669	0.000174833	0.0060784		0.0508285	0.104055	0.0354193	0.0159533
2015-07-14	11:17:30	00:00:05	26.75	0.445833	26.13	26.1259	39.47	18.692	57.1899	33.7341	52.89	191.667								12.4351	43.1899	25.8161	7.75631		0.00768803	0.0566438	0.0248126	0.00360584		0.0503317	0.104033	0.0352335	0.0159453
2015-07-14	11:17:35	00:00:05	26.8333	0.447222	26.13	26.1259	39.67	21.4508	58.1726	19.7235	59.491	191.722								15.1939	44.1726	11.8055	14.3573		0.0106022	0.0587252	0.00707331	0.00968154		0.0498471	0.104167	0.035111	0.0159546
2015-07-14	11:17:40	00:00:05	26.9167	0.448611	26.13	26.126	39.56	19.873	43.2434	21.4172	60.8276	191.778								13.6161	29.2434	13.4992	15.6939		0.00889239	0.0303046	0.00877028	0.0111674		0.0493554	0.10423	0.0349287	0.0159823
2015-07-14	11:17:45	00:00:05	27	0.45	26.13	26.126	39.8	23.526	62.8418	21.9086	67.5354	191.833								17.2691	48.8418	13.9906	22.4017		0.013019	0.0689956	0.00928797	0.0197629		0.0488898	0.10429	0.0347958	0.0160393
2015-07-14	11:17:50	00:00:05	27.0833	0.451389	26.13	26.126	39.57	20.0104	57.1899	24.0265	57.5439	191.889								13.7535	43.1899	16.1085	12.4102		0.00903676	0.0566438	0.0116444	0.00766339		0.0483987	0.104362	0.0346014	0.0160258
2015-07-14	11:17:55	00:00:05	27.1667	0.452778	26.13	26.1261	39.67	21.4508	54.8279	33.7341	55.4657	191.944								15.1939	40.8279	25.8161	10.332		0.0106022	0.0517576	0.0248126	0.00571152		0.047914	0.104439	0.0345581	0.0159891
2015-07-14	11:18:00	00:00:05	27.25	0.454167	26.13	26.1261	39.52	19.3359	57.6782	38.0005	59.9304	192								13.079	43.6782	30.0825	14.7967		0.00833649	0.0576745	0.0317114	0.0101612		0.04742	0.104592	0.0344824	0.0159901
2015-07-14	11:18:05	00:00:05	27.3333	0.455556	26.13	26.1262	39.53	19.4702	53.9185	18.7317	59.0515	192.056								13.2133	39.9185	10.8137	13.9178		0.00847422	0.0499209	0.00614461	0.00921058		0.0469265	0.104623	0.0342774	0.0159753
2015-07-14	11:18:10	00:00:05	27.4167	0.456944	26.13	26.1262	39.51	19.2047	60.7117	24.2126	56.7017	192.111								12.9478	46.7117	16.2946	11.568		0.00820276	0.064233	0.0118609	0.00684646		0.0464319	0.10476	0.0341582	0.0159911
2015-07-14	11:18:15	00:00:05	27.5	0.458333	26.13	26.1263	39.43	18.1961	60.7117	18.869	55.6702	192.167								11.9392	46.7117	10.951	10.5365		0.00720221	0.064233	0.00627023	0.00589393		0.0459331	0.104588	0.0339871	0.0160056
2015-07-14	11:18:20	00:00:05	27.5833	0.459722	26.13	26.1263	39.02	13.9648	48.4192	24.9817	51.9348	192.222								7.70787	34.4192	17.0637	6.80111		0.00356978	0.0393575	0.0127716	0.0029205		0.045531	0.104402	0.0338362	0.0160027
2015-07-14	11:18:25	00:00:05	27.6667	0.461111	26.13	26.1263	39.18	15.448	54.3701	14.8102	56.2866	192.278								9.19107	40.3701	6.8922	11.1529		0.00473411	0.0508299	0.00298349	0.00645669		0.0451337	0.104437	0.0335491	0.016021
2015-07-14	11:18:30	00:00:05	27.75	0.4625	26.13	26.1264	39.29	16.5863	45.0073	25.7813	55.8746	192.333								10.3294	31.0073	17.8633	10.7409		0.00570918	0.0332895	0.013745	0.0060784		0.0448103	0.1044	0.0334022	0.0160436
2015-07-14	11:18:35	00:00:05	27.8333	0.463889	26.13	26.1264	39.75	22.699	78.3569	24.2126	57.1228	192.389								16.4421	64.3569	16.2946	11.9891		0.0120335	0.107395	0.0118609	0.00725059		0.0444833	0.104703	0.0332475	0.0160738
2015-07-14	11:18:40	00:00:05	27.9167	0.465278	26.13	26.1265	39.66	21.3013	54.3701	23.4741	67.5354	192.444								15.0444	40.3701	15.5561	22.4017		0.0104354	0.0508299	0.0110105	0.0197629		0.0440731	0.104784	0.0329833	0.0161561
2015-07-14	11:18:45	00:00:05	28	0.466667	26.13	26.1265	39.54	19.603	46.4844	37.677	59.2712	192.5								13.3461	32.4844	29.759	14.1375		0.00861125	0.0358695	0.0311661	0.0094449		0.0436151	0.104818	0.0328481	0.0161627
2015-07-14	11:18:50	00:00:05	28.0833	0.468056	26.13	26.1265	39.55	19.7388	39.9658	36.0962	56.7017	192.556								13.4819	25.9658	28.1782	11.568		0.00875223	0.0250438	0.0285536	0.00684646		0.0432054	0.104573	0.0328013	0.0161897
2015-07-14	11:18:55	00:00:05	28.1667	0.469444	26.13	26.1266	39.44	18.3182	59.6802	23.8403	51.7487	192.611								12.0613	45.6802	15.9223	6.61501		0.00732072	0.0619731	0.0114292	0.00279338		0.0427585	0.104523	0.0326861	0.0161768
2015-07-14	11:19:00	00:00:05	28.25	0.470833	26.13	26.1266	39.26	16.2659	61.2366	25.1801	64.0808	192.667								10.009	47.2366	17.2621	18.9471		0.0054278	0.0653946	0.0130106	0.015107		0.0422787	0.104452	0.0325252	0.0162316
2015-07-14	11:19:05	00:00:05	28.3333	0.472222	26.13	26.1267	39.02	13.9648	46.4844	19.1498	80.1147	192.722								7.70787	32.4844	11.2318	34.981		0.00356978	0.0358695	0.0065301	0.040393		0.0418623	0.104169	0.0323373	0.0163276
2015-07-14	11:19:10	00:00:05	28.4167	0.473611	26.13	26.1267	39.12	14.8697	50.8667	19.1498	72.0093	192.778								8.61277	36.8667	11.2318	26.8756		0.00426548	0.0439421	0.0065301	0.0264661		0.041463	0.103984	0.0320079	0.0164379
2015-07-14	11:19:15	00:00:05	28.5	0.475	26.13	26.1268	39.19	15.5472	46.1121	17.4194	52.89	192.833								9.29027	32.1121	9.5014	7.75631		0.00481634	0.0352124	0.0049931	0.00360584		0.0410216	0.103805	0.0318209	0.0164499
2015-07-14	11:19:20	00:00:05	28.5833	0.476389	26.13	26.1268	38.88	12.8143	37.561	21.9086	54.657	192.889								6.55737	23.561	13.9906	9.52331		0.00275444	0.0214288	0.00928797	0.00501158		0.0406161	0.103574	0.0316482	0.0164651
2015-07-14	11:19:25	00:00:05	28.6667	0.477778	26.13	26.1268	38.61	10.9169	38.739	23.4741	61.0535	192.944								4.65997	24.739	15.5561	15.9198		0.00159252	0.0231731	0.0110105	0.0114264		0.040169	0.103504	0.0314935	0.0164724
2015-07-14	11:19:30	00:00:05	28.75	0.479167	26.13	26.1269	38.54	10.4843	38.739	21.2555	50.8179	193								4.22737	24.739	13.3375	5.68421		0.00136212	0.0231731	0.00860238	0.00219023		0.039778	0.103323	0.0311849	0.0164815
2015-07-14	11:19:35	00:00:05	28.8333	0.480556	26.13	26.1269	38.88	12.8143	61.7676	17.0486	56.9092	193.056								6.55737	47.7676	9.1306	11.7755		0.00275444	0.0665778	0.00468425	0.00704451		0.0394365	0.103232	0.0308011	0.0164927
2015-07-14	11:19:40	00:00:05	28.9167	0.481944	26.13	26.127	38.62	10.9802	51.7151	24.7864	71.1975	193.111								4.72327	37.7151	16.8684	26.0638		0.00162736	0.0455753	0.0125379	0.0251956		0.0389818	0.103186	0.0306061	0.0165977
2015-07-14	11:19:45	00:00:05	29	0.483333	26.13	26.127	38.51	10.3058	51.2878	29.5502	60.8276	193.167								4.04887	37.2878	21.6322	15.6939		0.00127105	0.0447499	0.0186853	0.0111674		0.0386099	0.10301	0.0303947	0.0166423
2015-07-14	11:19:50	00:00:05	29.0833	0.484722	26.13	26.127	38.16	8.48541	62.8418	32.8979	54.0619	193.222								2.22848	48.8418	24.9799	8.92821		0.000487759	0.0689956	0.0235361	0.00451882		0.0382705	0.103078	0.0301544	0.0166318
2015-07-14	11:19:55	00:00:05	29.1667	0.486111	26.13	26.1271	38.6	10.8536	54.8279	39.3372	55.8746	193.278								4.59667	40.8279	31.4192	10.7409		0.00155797	0.0517576	0.0340017	0.0060784		0.0379727	0.102898	0.0298783	0.0166396
2015-07-14	11:20:00	00:00:05	29.25	0.4875	26.13	26.1271	38.57	10.6674	48.0225	38.6597	64.8071	193.333								4.41047	34.0225	30.7417	19.6734		0.00145798	0.0386325	0.0328333	0.0160466		0.0376843	0.102684	0.0297209	0.0166827
2015-07-14	11:20:05	00:00:05	29.3333	0.488889	26.13	26.1272	38.87	12.7365	36.9873	27.6978	57.3303	193.389								6.47957	22.9873	19.7798	12.1966		0.00270221	0.020598	0.016186	0.00745293		0.037354	0.102388	0.0296137	0.0167137
2015-07-14	11:20:10	00:00:05	29.4167	0.490278	26.13	26.1272	39	13.7924	56.2317	27.478	69.5984	193.444								7.53547	42.2317	19.56	24.4647		0.00344258	0.0546416	0.0158985	0.0227624		0.0370435	0.102206	0.0294991	0.0167855
2015-07-14	11:20:15	00:00:05	29.5	0.491667	26.13	26.1273	38.82	12.3581	38.4399	36.4075	65.5396	193.5								6.10117	24.4399	28.4895	20.4059		0.00245359	0.0227254	0.0290612	0.0170156		0.0367341	0.101932	0.0294426	0.016842
2015-07-14	11:20:20	00:00:05	29.5833	0.493056	26.13	26.1273	37.92	7.46918	35.0677	36.7188	80.1147	193.556								1.21225	21.0677	28.8008	34.981		0.000183688	0.0179094	0.0295722	0.040393		0.0364679	0.101474	0.0293881	0.017006
2015-07-14	11:20:25	00:00:05	29.6667	0.494444	26.13	26.1273	38.17	8.53119	48.0225	31.8176	70.929	193.611								2.27426	34.0225	23.8996	25.7953		0.000503931	0.0386325	0.0219249	0.0247805		0.0361896	0.101331	0.0292489	0.0170966
2015-07-14	11:20:30	00:00:05	29.75	0.495833	26.13	26.1274	38.58	10.7285	63.3911	45.2942	84.2102	193.667								4.47157	49.3911	37.3762	39.0765		0.00149052	0.0702444	0.0449202	0.0482428		0.0359613	0.101274	0.0292133	0.0172976
2015-07-14	11:20:35	00:00:05	29.8333	0.497222	26.13	26.1274	38.56	10.6064	40.918	33.7341	86.1816	193.722								4.34947	26.918	25.8161	41.0479		0.00142578	0.0265331	0.0248126	0.0522057		0.0357402	0.101071	0.0291053	0.0175001
2015-07-14	11:20:40	00:00:05	29.9167	0.498611	26.13	26.1275	38.91	13.0508	50.0366	40.0269	72.0093	193.778								6.79387	36.0366	32.1089	26.8756		0.00291552	0.0423659	0.0352068	0.0264661		0.0355289	0.100815	0.0288558	0.0176104
2015-07-14	11:20:45	00:00:05	30	0.5	26.13	26.1275	38.61	10.9169	43.5913	61.9873	104.694	193.833								4.65997	29.5913	54.0693	59.5603		0.00159252	0.0308849	0.081218	0.0948484		0.0353225	0.100512	0.0289291	0.0180056
2015-07-14	11:20:50	00:00:05	30.0833	0.501389	26.13	26.1275	39.36	17.3676	52.5818	54.3457	114.166	193.889								11.1107	38.5818	46.4277	69.0323		0.00641751	0.0472669	0.0636077	0.120182		0.0351619	0.1004	0.0289715	0.0184753
2015-07-14	11:20:55	00:00:05	30.1667	0.502778	26.12	26.1275	38.43	9.84879	58.1726	48.6816	84.8633	193.944								3.59186	44.1726	40.7636	39.7296		0.00104889	0.0587252	0.0516269	0.0495426		0.0349428	0.100413	0.0289927	0.0186808
2015-07-14	11:21:00	00:00:05	30.25	0.504167	26.12	26.1275	38.18	8.57773	37.851	35.4858	69.0796	194								2.3208	23.851	27.5678	23.9459		0.000520574	0.0218534	0.0275679	0.0219931		0.0347354	0.100346	0.0289034	0.0187723
2015-07-14	11:21:05	00:00:05	30.3333	0.505556	26.13	26.1276	38.35	9.41772	28.949	35.1868	78.894	194.056								3.16079	14.949	27.2688	33.7603		0.00085442	0.0103294	0.0270899	0.038156		0.0345119	0.100126	0.0287466	0.0188314
2015-07-14	11:21:10	00:00:05	30.4167	0.506944	26.13	26.1276	38.4	9.68399	34.0271	34.5947	86.1816	194.111								3.42706	20.0271	26.6767	41.0479		0.000972778	0.0165118	0.0261526	0.0522057		0.034313	0.100022	0.0286289	0.019049
2015-07-14	11:21:15	00:00:05	30.5	0.508333	26.13	26.1277	38.31	9.21021	40.5945	44.4946	123.083	194.167								2.95328	26.5945	36.5766	77.9493		0.000766245	0.0260235	0.0433888	0.146038		0.0341033	0.0997683	0.0285102	0.0196289
2015-07-14	11:21:20	00:00:05	30.5833	0.509722	26.13	26.1277	38.7	11.5067	35.0677	40.3809	112.378	194.222								5.24977	21.0677	32.4629	67.2443		0.00192799	0.0179094	0.0358315	0.115228		0.0338691	0.0993628	0.0283945	0.0200041
2015-07-14	11:21:25	00:00:05	30.6667	0.511111	26.13	26.1278	38.35	9.41772	33.5205	36.4075	111.938	194.278								3.16079	19.5205	28.4895	66.8043		0.00085442	0.015847	0.0290612	0.114021		0.0336527	0.0990333	0.0282314	0.0204759
2015-07-14	11:21:30	00:00:05	30.75	0.5125	26.13	26.1278	38.16	8.48541	60.1929	34.5947	130.127	194.333								2.22848	46.1929	26.6767	84.9933		0.000487759	0.0630925	0.0261526	0.167777		0.0334045	0.0988076	0.028002	0.0211749
2015-07-14	11:21:35	00:00:05	30.8333	0.513889	26.13	26.1278	38.74	11.7813	59.1675	43.3228	93.4814	194.389								5.52437	45.1675	35.4048	48.3477		0.00209228	0.0608612	0.0411808	0.0678794		0.0331825	0.0987935	0.0278991	0.0214482
2015-07-14	11:21:40	00:00:05	30.9167	0.515278	26.13	26.1279	38.75	11.8515	58.1726	46.9482	108.038	194.444								5.59457	44.1726	39.0302	62.9043		0.00213509	0.0587252	0.0481511	0.103534		0.0329371	0.0985665	0.0279189	0.0218796
2015-07-14	11:21:45	00:00:05	31	0.516667	26.13	26.1279	38.92	13.1302	28.3325	50.9521	105.518	194.5								6.87327	14.3325	43.0341	60.3843		0.00297036	0.00965472	0.0563164	0.096962		0.0327187	0.0983243	0.0277906	0.0222836
2015-07-14	11:21:50	00:00:05	31.0833	0.518056	26.13	26.128	38.54	10.4843	32.5378	47.3755	127.563	194.556								4.22737	18.5378	39.4575	82.4293		0.00136212	0.014587	0.0489994	0.159733		0.0324742	0.0980595	0.0276442	0.0229145
2015-07-14	11:21:55	00:00:05	31.1667	0.519444	26.13	26.128	38.28	9.05914	42.9016	52.8564	151.477	194.611								2.80221	28.9016	44.9384	106.343		0.000704353	0.0297384	0.0603668	0.240349		0.0321921	0.0976502	0.0276528	0.0239153
2015-07-14	11:22:00	00:00:05	31.25	0.520833	26.13	26.128	38.21	8.71887	45.7397	44.0979	117.834	194.667								2.46194	31.7397	36.1799	72.7003		0.00057228	0.0345597	0.0426364	0.130588		0.0319275	0.0974257	0.027461	0.0244472
2015-07-14	11:22:05	00:00:05	31.3333	0.522222	26.13	26.1281	38.51	10.3058	33.7708	40.0269	95.3186	194.722								4.04887	19.7708	32.1089	50.1849		0.00127105	0.0161742	0.0352068	0.072064		0.0316525	0.0970833	0.0271353	0.0247331
2015-07-14	11:22:10	00:00:05	31.4167	0.523611	26.13	26.1281	38.65	11.174	36.7065	42.1875	119.238	194.778								4.91707	22.7065	34.2695	74.1043		0.00173579	0.0201959	0.0390833	0.134657		0.0314054	0.0966958	0.0269826	0.0252941
2015-07-14	11:22:15	00:00:05	31.5	0.525	26.13	26.1282	38.49	10.1898	39.9658	45.7031	112.378	194.833								3.93287	25.9658	37.7851	67.2443		0.00121315	0.0250438	0.0457111	0.115228		0.0311478	0.0964567	0.0268788	0.0257626
2015-07-14	11:22:20	00:00:05	31.5833	0.526389	26.13	26.1282	38.16	8.48541	39.6545	44.0979	115.979	194.889								2.22848	25.6545	36.1799	70.8453		0.000487759	0.0245639	0.0426364	0.125285		0.0308406	0.0961705	0.026796	0.0262846
2015-07-14	11:22:25	00:00:05	31.6667	0.527778	26.13	26.1283	38.84	12.5076	33.5205	44.4946	175.085	194.944								6.25067	19.5205	36.5766	129.951		0.00255074	0.015847	0.0433888	0.331515		0.0305263	0.0957305	0.0265942	0.0276613
2015-07-14	11:22:30	00:00:05	31.75	0.529167	26.13	26.1283	39.28	16.4795	47.2473	48.6816	105.103	195								10.2226	33.2473	40.7636	59.9693		0.00561479	0.0372303	0.0516269	0.0958953		0.030153	0.0955877	0.0265533	0.0280552
2015-07-14	11:22:35	00:00:05	31.8333	0.530556	26.13	26.1283	38.96	13.4567	48.8159	47.3755	128.076	195.056								7.19977	34.8159	39.4575	82.9423		0.00319991	0.0400877	0.0489994	0.16133		0.0297891	0.0954173	0.0265269	0.0287274
2015-07-14	11:22:40	00:00:05	31.9167	0.531944	26.13	26.1284	38.68	11.3724	47.6318	32.6233	189.807	195.111								5.11547	33.6318	24.7053	144.673		0.00184949	0.0379233	0.0231225	0.393788		0.0294439	0.0951656	0.0262964	0.0303673
2015-07-14	11:22:45	00:00:05	32	0.533333	26.13	26.1284	39.17	15.3503	34.5428	30.0354	126.05	195.167								9.09337	20.5428	22.1174	80.9163		0.00465365	0.0171991	0.0193621	0.155056		0.0290796	0.0949059	0.0261729	0.0309918
2015-07-14	11:22:50	00:00:05	32.0833	0.534722	26.13	26.1285	38.79	12.1384	76.9531	33.1726	200	195.222								5.88147	62.9531	25.2546	154.866		0.00231342	0.103663	0.0239526	0.439228		0.0286506	0.0948578	0.0260461	0.0328186
2015-07-14	11:22:55	00:00:05	32.1667	0.536111	26.13	26.1285	39.01	13.8794	65.0635	39.3372	140.381	195.278								7.62247	51.0635	31.4192	95.2473		0.00350656	0.0740984	0.0340017	0.201409		0.028255	0.0947346	0.0260038	0.0336422
2015-07-14	11:23:00	00:00:05	32.25	0.5375	26.13	26.1285	39.26	16.2659	50.4456	25.9857	122.595	195.333								10.009	36.4456	18.0677	77.4613		0.0054278	0.0431398	0.0139982	0.144574		0.0279128	0.0944973	0.0257574	0.0342216
2015-07-14	11:23:05	00:00:05	32.3333	0.538889	26.13	26.1286	39.02	13.9648	43.2434	27.2583	127.563	195.389								7.70787	29.2434	19.3403	82.4293		0.00356978	0.0303046	0.015613	0.159733		0.0275243	0.0943038	0.025523	0.0348814
2015-07-14	11:23:10	00:00:05	32.4167	0.540278	26.13	26.1286	38.78	12.0651	33.2703	35.4858	168.848	195.444								5.80817	19.2703	27.5678	123.714		0.00226735	0.0155225	0.0275679	0.306366		0.0270139	0.0939933	0.0254032	0.0361579
2015-07-14	11:23:15	00:00:05	32.5	0.541667	26.13	26.1286	38.73	11.7126	44.2932	27.0386	113.269	195.5								5.45567	30.2932	19.1206	68.1353		0.00205071	0.0320684	0.0153295	0.117687		0.0265912	0.0936384	0.0252066	0.0366155
2015-07-14	11:23:20	00:00:05	32.5833	0.543056	26.13	26.1287	38.42	9.79309	50.8667	26.1932	146.692	195.556								3.53616	36.8667	18.2752	101.558		0.00102293	0.0439421	0.0142569	0.223239		0.0261567	0.093374	0.0250055	0.0375312
2015-07-14	11:23:25	00:00:05	32.6667	0.544444	26.13	26.1287	38.5	10.2478	60.7117	36.0962	135.962	195.611								3.99087	46.7117	28.1782	90.8283		0.00124197	0.064233	0.0285536	0.186632		0.0256508	0.0931444	0.0248144	0.038308
2015-07-14	11:23:30	00:00:05	32.75	0.545833	26.13	26.1288	39.21	15.7486	54.8279	42.1875	164.819	195.667								9.49167	40.8279	34.2695	119.685		0.0049849	0.0517576	0.0390833	0.290521		0.0251861	0.0929281	0.0246504	0.0395185
2015-07-14	11:23:35	00:00:05	32.8333	0.547222	26.13	26.1288	39.49	18.9468	37.561	40.7349	116.907	195.722								12.6899	23.561	32.8169	71.7733		0.00794227	0.0214288	0.0364603	0.127927		0.0246904	0.0925457	0.024362	0.0399959
2015-07-14	11:23:40	00:00:05	32.9167	0.548611	26.13	26.1288	39.13	14.9643	70.3979	34.3079	147.278	195.778								8.70737	56.3979	26.3899	102.144		0.00434088	0.0869011	0.0257031	0.225309		0.0241422	0.0924278	0.0241946	0.0408383
2015-07-14	11:23:45	00:00:05	33	0.55	26.13	26.1289	39.33	17.0273	41.5649	42.9443	148.474	195.833								10.7704	27.5649	35.0263	103.34		0.00610516	0.0275633	0.0404769	0.229556		0.0236478	0.0919999	0.0241482	0.0417947
2015-07-14	11:23:50	00:00:05	33.0833	0.551389	26.13	26.1289	39.38	17.5995	59.1675	52.3804	104.285	195.889								11.3426	45.1675	44.4624	59.1513		0.00663371	0.0608612	0.0593444	0.0938059		0.0231899	0.0919906	0.0241257	0.0421844
2015-07-14	11:23:55	00:00:05	33.1667	0.552778	26.13	26.129	39.47	18.692	63.3911	45.2942	111.493	195.944								12.4351	49.3911	37.3762	66.3593		0.00768803	0.0702444	0.0449202	0.112805		0.0226046	0.0918877	0.023986	0.0426411
2015-07-14	11:24:00	00:00:05	33.25	0.554167	26.13	26.129	39.6	20.4285	53.0212	47.3755	150.867	196								14.1716	39.0212	39.4575	105.733		0.00948143	0.0481333	0.0489994	0.238141		0.0220779	0.0916247	0.023869	0.0436333
2015-07-14	11:24:05	00:00:05	33.3333	0.555556	26.13	26.129	39.86	24.5728	72.3022	32.8979	96.0632	196.056								18.3159	58.3022	24.9799	50.9295		0.0143079	0.0916554	0.0235361	0.0737867		0.0215513	0.0915591	0.0237198	0.0438995
2015-07-14	11:24:10	00:00:05	33.4167	0.556944	26.13	26.1291	40.08	28.949	58.667	36.0962	115.527	196.111								22.6921	44.667	28.1782	70.3933		0.0201754	0.0597831	0.0285536	0.124005		0.0210882	0.0914331	0.0235959	0.0444161
2015-07-14	11:24:15	00:00:05	33.5	0.558333	26.13	26.1291	40.05	28.2959	59.6802	39.6851	108.887	196.167								22.039	45.6802	31.7671	63.7533		0.0192521	0.0619731	0.0346076	0.105784		0.0206746	0.0911581	0.023475	0.0448166
2015-07-14	11:24:20	00:00:05	33.5833	0.559722	26.13	26.1292	40.23	32.5195	46.8628	40.0269	88.8855	196.222								26.2626	32.8628	32.1089	43.7518		0.0255045	0.0365421	0.0352068	0.0578305		0.0202429	0.0908043	0.0234471	0.0450443
2015-07-14	11:24:25	00:00:05	33.6667	0.561111	26.13	26.1292	40.1	29.3945	65.625	41.4551	132.745	196.278								23.1376	51.625	33.5371	87.6113		0.0208145	0.0754096	0.0377522	0.176143		0.0198441	0.0904943	0.0233529	0.0457463
2015-07-14	11:24:30	00:00:05	33.75	0.5625	26.13	26.1293	40.04	28.0823	71.6553	43.7134	99.1089	196.333								21.8254	57.6553	35.7954	53.9752		0.0189537	0.0900296	0.041912	0.0809914		0.0194615	0.090414	0.0233303	0.0460768
2015-07-14	11:24:35	00:00:05	33.8333	0.563889	26.13	26.1293	40.08	28.949	65.0635	39.3372	81.9763	196.389								22.6921	51.0635	31.4192	36.8426		0.0201754	0.0740984	0.0340017	0.043896		0.0190762	0.0903669	0.0232531	0.0461861
2015-07-14	11:24:40	00:00:05	33.9167	0.565278	26.13	26.1293	40.07	28.7292	57.6782	43.3228	82.9285	196.444								22.4723	43.6782	35.4048	37.7948		0.0198628	0.0576745	0.0411808	0.0457299		0.0187203	0.0902117	0.0232589	0.0463392
2015-07-14	11:24:45	00:00:05	34	0.566667	26.13	26.1293	39.95	26.2543	84.2407	40.3809	108.038	196.5								19.9974	70.2407	32.4629	62.9043		0.0164725	0.123574	0.0358315	0.103534		0.0183502	0.0902869	0.0231337	0.0467629
2015-07-14	11:24:50	00:00:05	34.0833	0.568056	26.13	26.1294	40.02	27.6642	74.9146	38.0005	69.5984	196.556								21.4073	60.9146	30.0825	24.4647		0.0183747	0.0983314	0.0317114	0.0227624		0.0180367	0.0901539	0.0230544	0.0468476
2015-07-14	11:24:55	00:00:05	34.1667	0.569444	26.13	26.1294	40.1	29.3945	67.3706	28.6072	66.2781	196.611								23.1376	53.3706	20.6892	21.1444		0.0208145	0.0795411	0.0173961	0.0180141		0.0177463	0.0899233	0.0228114	0.0468772
2015-07-14	11:25:00	00:00:05	34.25	0.570833	26.13	26.1294	40.26	33.2947	61.2366	37.677	71.4661	196.667								27.0378	47.2366	29.759	26.3324		0.0267227	0.0653946	0.0311661	0.0256133		0.0175327	0.0897639	0.022694	0.0469374
2015-07-14	11:25:05	00:00:05	34.3333	0.572222	26.13	26.1295	40.25	33.0322	69.165	39.3372	61.0535	196.722								26.7753	55.165	31.4192	15.9198		0.0263078	0.0838741	0.0340017	0.0114264		0.0173331	0.0897513	0.0225515	0.0469831
2015-07-14	11:25:10	00:00:05	34.4167	0.573611	26.13	26.1295	40.26	33.2947	66.7847	34.5947	60.1532	196.778								27.0378	52.7847	26.6767	15.0195		0.0267227	0.0781452	0.0261526	0.0104077		0.0171547	0.0896672	0.0222845	0.0470265
2015-07-14	11:25:15	00:00:05	34.5	0.575	26.13	26.1295	40.25	33.0322	79.7852	32.3547	86.853	196.833								26.7753	65.7852	24.4367	41.7193		0.0263078	0.111244	0.0227206	0.0535821		0.01696	0.0897137	0.0221445	0.047201
2015-07-14	11:25:20	00:00:05	34.5833	0.576389	26.13	26.1295	40.48	39.801	71.0205	43.3228	64.563	196.889								33.5441	57.0205	35.4048	19.4293		0.0377648	0.088445	0.0411808	0.0157284		0.0168504	0.089549	0.0221817	0.0472665
2015-07-14	11:25:25	00:00:05	34.6667	0.577778	26.14	26.1296	40.51	40.8081	74.9146	45.2942	80.7251	196.944								34.5512	60.9146	37.3762	35.5914		0.0395999	0.0983314	0.0449202	0.0415295		0.0167692	0.0893009	0.0221849	0.0474314
2015-07-14	11:25:30	00:00:05	34.75	0.579167	26.13	26.1296	40.49	40.1367	76.2695	46.5332	46.4417	197								33.8798	62.2695	38.6152	1.30801		0.0383728	0.101863	0.0473325	0.000207512		0.0166908	0.0892105	0.0222075	0.0473846
2015-07-14	11:25:35	00:00:05	34.8333	0.580556	26.13	26.1297	40.52	41.1499	75.5859	48.2422	55.0598	197.056								34.893	61.5859	40.3242	9.92611		0.0402301	0.100075	0.0507372	0.00535591		0.0166349	0.0892177	0.0222867	0.0473824
2015-07-14	11:25:40	00:00:05	34.9167	0.581944	26.13	26.1297	40.47	39.4714	64.4958	40.7349	46.9421	197.111								33.2145	50.4958	32.8169	1.80841		0.0371713	0.0727815	0.0364603	0.000348902		0.0165932	0.0892012	0.0223019	0.0473837
2015-07-14	11:25:45	00:00:05	35	0.583333	26.13	26.1297	40.41	37.5671	75.5859	38.0005	50.4517	197.167								31.3102	61.5859	30.0825	5.31801		0.0338126	0.100075	0.0317114	0.00196834		0.0165034	0.0890461	0.0222226	0.0473919
2015-07-14	11:25:50	00:00:05	35.0833	0.584722	26.13	26.1297	40.34	35.4919	79.0649	30.5359	40.1642	197.222								29.235	65.0649	22.6179	-4.96949		0.0302905	0.109297	0.0200697	0		0.0164132	0.0889776	0.0220633	0.0473599
2015-07-14	11:25:55	00:00:05	35.1667	0.586111	26.13	26.1298	40.22	32.2632	74.9146	37.3535	44.9707	197.278								26.0063	60.9146	29.4355	-0.162991		0.0251064	0.0983314	0.0306245	0		0.0163049	0.0888901	0.0219211	0.0473599
2015-07-14	11:26:00	00:00:05	35.25	0.5875	26.13	26.1298	40.4	37.262	82.7271	46.9482	33.7921	197.333								31.0051	68.7271	39.0302	-11.3416		0.0332857	0.119331	0.0481511	0		0.0162406	0.0888633	0.0219029	0.0473467
2015-07-14	11:26:05	00:00:05	35.3333	0.588889	26.13	26.1298	40.43	38.1897	81.2378	43.7134	25.7187	197.389								31.9328	67.2378	35.7954	-19.415		0.0348975	0.11521	0.041912	0		0.0161661	0.0888374	0.0217727	0.047313
2015-07-14	11:26:10	00:00:05	35.4167	0.590278	26.13	26.1299	40.36	36.0718	71.6553	38.6597	37.3322	197.444								29.8149	57.6553	30.7417	-7.80149		0.0312601	0.0900296	0.0328333	0		0.01608	0.0887153	0.0217797	0.0473029
2015-07-14	11:26:15	00:00:05	35.5	0.591667	26.13	26.1299	40.38	36.6638	73.5962	34.021	36.5662	197.5								30.4069	59.5962	26.103	-8.56749		0.0322616	0.0949401	0.0252564	0		0.0159799	0.0884974	0.0218043	0.0472552
2015-07-14	11:26:20	00:00:05	35.5833	0.593056	26.13	26.13	40.55	42.2058	87.3779	40.3809	40.5884	197.556								35.9489	73.3779	32.4629	-4.54529		0.0422006	0.132546	0.0358315	0		0.0158888	0.0885348	0.0216541	0.0472337
2015-07-14	11:26:25	00:00:05	35.6667	0.594444	26.13	26.13	40.55	42.2058	88.1836	39.3372	23.4985	197.611								35.9489	74.1836	31.4192	-21.6352		0.0422006	0.134888	0.0340017	0		0.0157796	0.0885248	0.0214689	0.0472051
2015-07-14	11:26:30	00:00:05	35.75	0.595833	26.13	26.13	40.58	43.2861	83.4839	39.6851	32.0068	197.667								37.0292	69.4839	31.7671	-13.1269		0.0442531	0.121446	0.0346076	0		0.0156647	0.0885159	0.021303	0.0471471
2015-07-14	11:26:35	00:00:05	35.8333	0.597222	26.13	26.13	40.58	43.2861	86.5845	60.8276	38.2492	197.722								37.0292	72.5845	52.9096	-6.88449		0.0442531	0.130255	0.078442	0		0.0155821	0.0884344	0.0212669	0.0471218
2015-07-14	11:26:40	00:00:05	35.9167	0.598611	26.13	26.13	40.65	45.9595	89.0015	46.9482	42.1906	197.778								39.7026	75.0015	39.0302	-2.94309		0.0494885	0.137281	0.0481511	0		0.015508	0.0884541	0.0212703	0.0471102
2015-07-14	11:26:45	00:00:05	36	0.6	26.13	26.13	40.64	45.5688	85.0098	53.8452	40.8752	197.833								39.3119	71.0098	45.9272	-4.25849		0.0487097	0.125752	0.0625114	0		0.0154212	0.0884258	0.0213762	0.047098
2015-07-14	11:26:50	00:00:05	36.0833	0.601389	26.13	26.13	40.74	49.7131	84.2407	55.8838	40.5884	197.889								43.4562	70.2407	47.9658	-4.54529		0.057205	0.123574	0.0670214	0		0.0153603	0.0882477	0.0214982	0.0470923
2015-07-14	11:26:55	00:00:05	36.1667	0.602778	26.13	26.13	40.62	44.7937	74.2554	46.1182	31.2607	197.944								38.5368	60.2554	38.2002	-13.873		0.0471784	0.0966302	0.0465192	0		0.0152476	0.0881354	0.0215849	0.0470887
2015-07-14	11:27:00	00:00:05	36.25	0.604167	26.13	26.13	40.61	44.4092	80.5054	48.2422	45.4559	198								38.1523	66.5054	40.3242	0.322209		0.0464256	0.113204	0.0507372	2.19307e-05		0.0152065	0.0881974	0.0217	0.0470271
2015-07-14	11:27:05	00:00:05	36.3333	0.605556	26.13	26.13	40.58	43.2861	77.6489	41.8213	41.1621	198.056								37.0292	63.6489	33.9033	-3.97159		0.0442531	0.105507	0.0384156	0		0.0151943	0.088113	0.0217764	0.0469934
2015-07-14	11:27:10	00:00:05	36.4167	0.606944	26.13	26.13	40.49	40.1367	87.3779	32.8979	36.8195	198.111								33.8798	73.3779	24.9799	-8.31419		0.0383728	0.132546	0.0235361	0		0.0150597	0.0882902	0.0218172	0.0469624
2015-07-14	11:27:15	00:00:05	36.5	0.608333	26.13	26.13	40.46	39.1479	90.6494	47.3755	42.4896	198.167								32.891	76.6494	39.4575	-2.64409		0.0365923	0.142151	0.0489994	0		0.0149272	0.0883204	0.0218981	0.0469624
2015-07-14	11:27:20	00:00:05	36.5833	0.609722	26.13	26.13	40.47	39.4714	97.6318	43.3228	58.1848	198.222								33.2145	83.6318	35.4048	13.0511		0.0371713	0.163487	0.0411808	0.00830802		0.0148151	0.0884684	0.022001	0.0469958
2015-07-14	11:27:25	00:00:05	36.6667	0.611111	26.13	26.13	40.57	42.9199	94.9463	36.4075	44.9707	198.278								36.663	80.9463	28.4895	-0.162991		0.0435532	0.155148	0.0290612	0		0.0147253	0.0885428	0.0220308	0.0469957
2015-07-14	11:27:30	00:00:05	36.75	0.6125	26.13	26.13	40.54	41.8518	85.791	33.4534	34.256	198.333								35.5949	71.791	25.5354	-10.8777		0.041536	0.127978	0.0243813	0		0.0146481	0.0884626	0.0220442	0.0469353
2015-07-14	11:27:35	00:00:05	36.8333	0.613889	26.13	26.13	40.45	38.8245	88.1836	37.3535	38.2492	198.389								32.5676	74.1836	29.4355	-6.88449		0.036017	0.134888	0.0306245	0		0.014552	0.0885446	0.0221338	0.0467549
2015-07-14	11:27:40	00:00:05	36.9167	0.615278	26.13	26.13	40.35	35.7788	87.3779	39.3372	52.3163	198.444								29.5219	73.3779	31.4192	7.18261		0.0307688	0.132546	0.0340017	0.00318769		0.014434	0.0886252	0.0222043	0.0467412
2015-07-14	11:27:45	00:00:05	37	0.616667	26.13	26.13	40.36	36.0718	89.8193	41.0889	38.1165	198.5								29.8149	75.8193	33.1709	-7.01719		0.0312601	0.13969	0.0370932	0		0.0143181	0.0885378	0.0222972	0.0467019
2015-07-14	11:27:50	00:00:05	37.0833	0.618056	26.14	26.13	40.33	35.2112	95.8252	55.3711	37.3322	198.556								28.9543	81.8252	47.4531	-7.80149		0.0298254	0.157859	0.0658761	0		0.0141921	0.0884903	0.0224835	0.0466037
2015-07-14	11:27:55	00:00:05	37.1667	0.619444	26.14	26.13	40.59	43.6584	92.3462	49.5728	44.0216	198.611								37.4015	78.3462	41.6548	-1.11209		0.0449689	0.147233	0.0534493	0		0.0141632	0.0885115	0.0225595	0.0466037
2015-07-14	11:28:00	00:00:05	37.25	0.620833	26.13	26.13	40.23	32.5195	95.8252	48.6816	24.4217	198.667								26.2626	81.8252	40.7636	-20.712		0.0255045	0.157859	0.0516269	0		0.0140821	0.0886632	0.0227022	0.0465998
2015-07-14	11:28:05	00:00:05	37.3333	0.622222	26.13	26.13	40.32	34.9274	89.0015	61.9873	22.403	198.722								28.6705	75.0015	54.0693	-22.7307		0.0293579	0.137281	0.081218	0		0.0140078	0.0886324	0.0230184	0.0465745
2015-07-14	11:28:10	00:00:05	37.4167	0.623611	26.13	26.13	40.3	34.375	92.3462	49.1272	43.0939	198.778								28.1181	78.3462	41.2092	-2.03979		0.0284559	0.147233	0.0525351	0		0.0139505	0.0884895	0.023146	0.0464624
2015-07-14	11:28:15	00:00:05	37.5	0.625	26.13	26.13	40.25	33.0322	98.5352	36.7188	43.0939	198.833								26.7753	84.5352	28.8008	-2.03979		0.0263078	0.166329	0.0295722	0		0.0139101	0.0887272	0.023187	0.0463982
2015-07-14	11:28:20	00:00:05	37.5833	0.626389	26.13	26.13	40.1	29.3945	97.6318	35.1868	47.2809	198.889								23.1376	83.6318	27.2688	2.14721		0.0208145	0.163487	0.0270899	0.000459543		0.0138344	0.0888463	0.0232394	0.0463371
2015-07-14	11:28:25	00:00:05	37.6667	0.627778	26.13	26.13	40.03	27.8748	96.7285	50.0305	52.3163	198.944								21.6179	82.7285	42.1125	7.18261		0.0186655	0.160664	0.0543944	0.00318769		0.0137548	0.0888915	0.0233747	0.0462849
2015-07-14	11:28:30	00:00:05	37.75	0.629167	26.13	26.13	40.17	31.0272	96.7285	56.9458	42.041	199								24.7703	82.7285	49.0278	-3.09269		0.0232201	0.160664	0.0694175	0		0.0137084	0.0889145	0.0235989	0.0462618
2015-07-14	11:28:35	00:00:05	37.8333	0.630556	26.13	26.13	40.06	28.5126	89.8193	68.2373	33.9081	199.056								22.2557	75.8193	60.3193	-11.2256		0.0195566	0.13969	0.0967946	0		0.0136534	0.0887662	0.0239733	0.0462051
2015-07-14	11:28:40	00:00:05	37.9167	0.631944	26.14	26.1301	40.04	28.0823	103.271	51.8921	32.663	199.111								21.8254	89.271	43.9741	-12.4707		0.0189537	0.181526	0.0583025	0		0.0135915	0.0889893	0.0241712	0.0461585
2015-07-14	11:28:45	00:00:05	38	0.633333	26.13	26.1301	40.28	33.8318	104.248	36.7188	36.438	199.167								27.5749	90.248	28.8008	-8.69569		0.0275793	0.184723	0.0295722	0		0.0136081	0.089066	0.0242655	0.0460685
2015-07-14	11:28:50	00:00:05	38.0833	0.634722	26.13	26.1301	40.29	34.1003	100.403	40.3809	44.6533	199.222								27.8434	86.403	32.4629	-0.480391		0.0280113	0.172263	0.0358315	0		0.0136202	0.0891485	0.024379	0.0459862
2015-07-14	11:28:55	00:00:05	38.1667	0.636111	26.13	26.1301	40.27	33.5632	100.403	34.5947	35.2066	199.278								27.3063	86.403	26.6767	-9.92709		0.0271496	0.172263	0.0261526	0		0.0136351	0.0891732	0.0243535	0.0459341
2015-07-14	11:29:00	00:00:05	38.25	0.6375	26.13	26.1301	40.13	30.0812	105.225	34.8877	42.6392	199.333								23.8243	91.225	26.9697	-2.49449		0.0218142	0.187941	0.0266149	0		0.0136128	0.089251	0.0243227	0.045859
2015-07-14	11:29:05	00:00:05	38.3333	0.638889	26.13	26.1301	40.42	37.8784	102.295	38.6597	36.9461	199.389								31.6215	88.295	30.7417	-8.18759		0.0343535	0.178353	0.0328333	0		0.013648	0.0891973	0.0243319	0.0457414
2015-07-14	11:29:10	00:00:05	38.4167	0.640278	26.13	26.1301	40.14	30.3162	106.226	38.6597	33.1085	199.444								24.0593	92.226	30.7417	-12.0252		0.0221603	0.19126	0.0328333	0		0.0136341	0.08914	0.0244512	0.0456399
2015-07-14	11:29:15	00:00:05	38.5	0.641667	26.13	26.1301	40.19	31.5125	105.225	38.6597	34.7275	199.5								25.2556	91.225	30.7417	-10.4062		0.0239541	0.187941	0.0328333	0		0.0136277	0.0891534	0.0245597	0.0453834
2015-07-14	11:29:20	00:00:05	38.5833	0.643056	26.14	26.1301	40.19	31.5125	109.277	32.6233	43.5547	199.556								25.2556	95.277	24.7053	-1.57899		0.0239541	0.20151	0.0231225	0		0.0136307	0.0891679	0.0246209	0.0452355
2015-07-14	11:29:25	00:00:05	38.6667	0.644444	26.14	26.1302	40.27	33.5632	107.227	33.7341	52.5085	199.611								27.3063	93.227	25.8161	7.37481		0.0271496	0.194601	0.0248126	0.00332561		0.0136501	0.0889972	0.0246924	0.0450203
2015-07-14	11:29:30	00:00:05	38.75	0.645833	26.13	26.1302	40.24	32.7759	114.575	37.3535	35.9406	199.667								26.519	100.575	29.4355	-9.19309		0.025905	0.219783	0.0306245	0		0.0136501	0.0891826	0.0248028	0.0447638
2015-07-14	11:29:35	00:00:05	38.8333	0.647222	26.13	26.1302	40.3	34.375	94.0674	36.7188	52.3163	199.722								28.1181	80.0674	28.8008	7.18261		0.0284559	0.152455	0.0295722	0.00318769		0.0136704	0.0889021	0.0247603	0.044604
2015-07-14	11:29:40	00:00:05	38.9167	0.648611	26.13	26.1302	40.23	32.5195	106.226	39.3372	42.6392	199.778								26.2626	92.226	31.4192	-2.49449		0.0255045	0.19126	0.0340017	0		0.0136871	0.0888298	0.0247474	0.0444729
2015-07-14	11:29:45	00:00:05	39	0.65	26.13	26.1302	40.31	34.6497	111.353	42.9443	57.7576	199.833								28.3928	97.353	35.0263	12.6239		0.0289031	0.208599	0.0404769	0.00787615		0.0137078	0.0887989	0.0248578	0.044216
2015-07-14	11:29:50	00:00:05	39.0833	0.651389	26.13	26.1302	40.28	33.8318	102.295	35.1868	49.1882	199.889								27.5749	88.295	27.2688	4.05451		0.0275793	0.178353	0.0270899	0.00127389		0.0137303	0.0885605	0.0249007	0.0436369
2015-07-14	11:29:55	00:00:05	39.1667	0.652778	26.13	26.1302	40.46	39.1479	111.353	36.7188	43.4021	199.944								32.891	97.353	28.8008	-1.73159		0.0365923	0.208599	0.0295722	0		0.013789	0.0886465	0.0250044	0.043523
2015-07-14	11:30:00	00:00:05	39.25	0.654167	26.13	26.1302	40.4	37.262	104.248	48.2422	46.4417	200								31.0051	90.248	40.3242	1.30801		0.0332857	0.184723	0.0507372	0.000207512		0.0138602	0.0886054	0.0251771	0.0430686
2015-07-14	11:30:05	00:00:05	39.3333	0.655556	26.13	26.1302	40.29	34.1003	101.343	46.5332	43.2495	200								27.8434	87.343	38.6152	-1.88419		0.0280113	0.175279	0.0473325	0		0.0139061	0.088566	0.0253171	0.0427575
2015-07-14	11:30:10	00:00:05	39.4167	0.656944	26.13	26.1302	40.47	39.4714	116.772	49.1272	38.2492	200								33.2145	102.772	41.2092	-6.88449		0.0371713	0.227534	0.0525351	0		0.0139912	0.0888329	0.0254106	0.0425255
2015-07-14	11:30:15	00:00:05	39.5	0.658333	26.13	26.1302	40.35	35.7788	105.225	36.0962	45.6177	200								29.5219	91.225	28.1782	0.484009		0.0307688	0.187941	0.0285536	4.21215e-05		0.014057	0.0888463	0.0254989	0.0421725
2015-07-14	11:30:20	00:00:05	39.5833	0.659722	26.13	26.1302	40.38	36.6638	101.343	48.2422	43.0939	200								30.4069	87.343	40.3242	-2.03979		0.0322616	0.175279	0.0507372	0		0.0141249	0.0889189	0.0256796	0.0419945
2015-07-14	11:30:25	00:00:05	39.6667	0.661111	26.13	26.1302	40.36	36.0718	115.674	36.4075	33.7921	200								29.8149	101.674	28.4895	-11.3416		0.0312601	0.223647	0.0290612	0		0.0141936	0.0891455	0.0257589	0.0417935
2015-07-14	11:30:30	00:00:05	39.75	0.6625	26.13	26.1302	40.39	36.9629	119.019	36.4075	43.866	200								30.706	105.019	28.4895	-1.26769		0.0327721	0.235566	0.0290612	0		0.0142751	0.0894458	0.0258126	0.0415107
2015-07-14	11:30:35	00:00:05	39.8333	0.663889	26.13	26.1302	40.43	38.1897	116.772	40.3809	46.9421	200								31.9328	102.772	32.4629	1.80841		0.0348975	0.227534	0.0358315	0.000348902		0.0143539	0.0898016	0.0259274	0.0410714
2015-07-14	11:30:40	00:00:05	39.9167	0.665278	26.13	26.1302	40.44	38.5071	131.006	31.8176	34.3735	200								32.2502	117.006	23.8996	-10.7602		0.0354556	0.280159	0.0219249	0		0.014443	0.0904166	0.0259746	0.0406718
2015-07-14	11:30:45	00:00:05	40	0.666667	26.13	26.1302	40.37	36.3647	116.772	36.7188	27.4567	200								30.1078	102.772	28.8008	-17.677		0.0317541	0.227534	0.0295722	0		0.0145175	0.0906594	0.0259746	0.0401658
2015-07-14	11:30:50	00:00:05	40.0833	0.668056	26.13	26.1302	40.47	39.4714	120.166	42.1875	26.3977	200								33.2145	106.166	34.2695	-18.736		0.0371713	0.239707	0.0390833	0		0.0146215	0.0911059	0.0259658	0.0397483
2015-07-14	11:30:55	00:00:05	40.1667	0.669444	26.13	26.1302	40.61	44.4092	119.019	38.3301	41.8945	200								38.1523	105.019	30.4121	-3.23919		0.0464256	0.235566	0.0322705	0		0.0147624	0.0914522	0.0260005	0.0393169
2015-07-14	11:31:00	00:00:05	40.25	0.670833	26.13	26.1302	40.46	39.1479	126.074	29.0741	32.2235	200								32.891	112.074	21.1561	-12.9102		0.0365923	0.26146	0.0180301	0		0.0148631	0.0919696	0.026028	0.0389514
2015-07-14	11:31:05	00:00:05	40.3333	0.672222	26.13	26.1302	40.47	39.4714	122.485	32.3547	37.7228	200								33.2145	108.485	24.4367	-7.41089		0.0371713	0.24816	0.0227206	0		0.0149709	0.0924113	0.0260714	0.0386511
2015-07-14	11:31:10	00:00:05	40.4167	0.673611	26.13	26.1302	40.45	38.8245	115.674	31.0425	42.9443	200								32.5676	101.674	23.1245	-2.18939		0.036017	0.223647	0.0207956	0		0.0150782	0.0929036	0.0260997	0.0384447
2015-07-14	11:31:15	00:00:05	40.5	0.675	26.13	26.1302	40.6	44.0308	126.074	45.2942	36.3129	200								37.7739	112.074	37.3762	-8.82079		0.0456893	0.26146	0.0449202	0		0.0152309	0.0934503	0.0262474	0.0383817
2015-07-14	11:31:20	00:00:05	40.5833	0.676389	26.13	26.1302	40.49	40.1367	133.569	38.0005	49.7253	200								33.8798	119.569	30.0825	4.59161		0.0383728	0.290068	0.0317114	0.00155522		0.0153555	0.0940968	0.0263628	0.0383117
2015-07-14	11:31:25	00:00:05	40.6667	0.677778	26.13	26.1302	40.64	45.5688	134.863	35.4858	45.7825	200								39.3119	120.863	27.5678	0.648809		0.0487097	0.295119	0.0275679	6.73961e-05		0.0155242	0.0948548	0.0264661	0.0381726
2015-07-14	11:31:30	00:00:05	40.75	0.679167	26.13	26.1302	40.61	44.4092	123.657	34.5947	33.1085	200								38.1523	109.657	26.6767	-12.0252		0.0464256	0.252475	0.0261526	0		0.0156922	0.0952015	0.0265134	0.0380624
2015-07-14	11:31:35	00:00:05	40.8333	0.680556	26.13	26.1302	40.56	42.5598	121.313	42.1875	33.5632	200								36.3029	107.313	34.2695	-11.5705		0.0428691	0.243874	0.0390833	0		0.015845	0.0955246	0.0266038	0.037941
2015-07-14	11:31:40	00:00:05	40.9167	0.681944	26.13	26.1302	40.57	42.9199	121.313	41.4551	32.0068	200								36.663	107.313	33.5371	-13.1269		0.0435532	0.243874	0.0377522	0		0.0160042	0.0960691	0.0266745	0.0378587
2015-07-14	11:31:45	00:00:05	41	0.683333	26.13	26.1302	40.57	42.9199	128.516	39.3372	32.5531	200								36.663	114.516	31.4192	-12.5806		0.0435532	0.270658	0.0340017	0		0.0161667	0.0965834	0.0267667	0.0376951
2015-07-14	11:31:50	00:00:05	41.0833	0.684722	26.13	26.1302	40.61	44.4092	117.896	42.5659	48.8373	200								38.1523	103.896	34.6479	3.70361		0.0464256	0.231539	0.0397778	0.00110173		0.0163338	0.0971085	0.0268587	0.037638
2015-07-14	11:31:55	00:00:05	41.1667	0.686111	26.13	26.1302	40.6	44.0308	133.569	38.6597	47.9645	200								37.7739	119.569	30.7417	2.83081		0.0456893	0.290068	0.0328333	0.000715919		0.0165008	0.0977451	0.0269148	0.037482
2015-07-14	11:32:00	00:00:05	41.25	0.6875	26.13	26.1302	40.84	54.3396	127.271	34.5947	45.6177	200								48.0827	113.271	26.6767	0.484009		0.0672836	0.265954	0.0261526	4.21215e-05		0.0167637	0.0985158	0.0270077	0.0373365
2015-07-14	11:32:05	00:00:05	41.3333	0.688889	26.13	26.1302	40.81	52.8931	128.516	27.478	40.5884	200								46.6362	114.516	19.56	-4.54529		0.0640665	0.270658	0.0158985	0		0.017014	0.0991196	0.0270643	0.0372656
2015-07-14	11:32:10	00:00:05	41.4167	0.690278	26.13	26.1302	40.75	50.1526	138.818	39.0015	48.6603	200								43.8957	124.818	31.0835	3.52661		0.0581358	0.310762	0.0334208	0.0010185		0.0172286	0.099801	0.0271789	0.0371407
2015-07-14	11:32:15	00:00:05	41.5	0.691667	26.13	26.1302	40.82	53.3691	137.5	38.6597	32.7728	200								47.1122	123.5	30.7417	-12.3609		0.0651186	0.305515	0.0328333	0		0.0174788	0.100743	0.0272819	0.0368842
2015-07-14	11:32:20	00:00:05	41.5833	0.693056	26.13	26.1302	40.95	60.0708	123.657	32.8979	35.817	200								53.8139	109.657	24.9799	-9.31669		0.0806034	0.252475	0.0235361	0		0.0177935	0.101426	0.0273315	0.0366987
2015-07-14	11:32:25	00:00:05	41.6667	0.694444	26.13	26.1302	40.92	58.4351	121.313	32.6233	42.3401	200								52.1782	107.313	24.7053	-2.79359		0.0767099	0.243874	0.0231225	0		0.0180972	0.102122	0.0274135	0.0364868
2015-07-14	11:32:30	00:00:05	41.75	0.695833	26.13	26.1302	40.86	55.3345	124.854	29.0741	49.7253	200								49.0776	110.854	21.1561	4.59161		0.0695306	0.25691	0.0180301	0.00155522		0.01837	0.102957	0.0274707	0.0364079
2015-07-14	11:32:35	00:00:05	41.8333	0.697222	26.13	26.1302	40.85	54.834	129.761	38.3301	49.7253	200								48.5771	115.761	30.4121	4.59161		0.0683967	0.275393	0.0322705	0.00155522		0.0186339	0.103773	0.0275745	0.0362729
2015-07-14	11:32:40	00:00:05	41.9167	0.698611	26.13	26.1302	40.94	59.5215	144.336	45.7031	39.7446	200								53.2646	130.336	37.7851	-5.38909		0.0792878	0.333091	0.0457111	0		0.0189431	0.104547	0.027749	0.0361781
2015-07-14	11:32:45	00:00:05	42	0.7	26.13	26.1302	40.92	58.4351	144.336	39.6851	42.7917	200								52.1782	130.336	31.7671	-2.34199		0.0767099	0.333091	0.0346076	0		0.0192504	0.10554	0.0278587	0.0360449
2015-07-14	11:32:50	00:00:05	42.0833	0.701389	26.13	26.1302	40.92	58.4351	119.019	39.3372	31.2607	200								52.1782	105.019	31.4192	-13.873		0.0767099	0.235566	0.0340017	0		0.0195562	0.106165	0.0279748	0.035931
2015-07-14	11:32:55	00:00:05	42.1667	0.702778	26.13	26.1302	41.06	66.5771	140.186	34.021	42.3401	200								60.3202	126.186	26.103	-2.79359		0.0967969	0.316243	0.0252564	0		0.0199376	0.107027	0.0280413	0.0358225
2015-07-14	11:33:00	00:00:05	42.25	0.704167	26.13	26.1302	41.04	65.332	124.854	39.3372	39.0564	200								59.0751	110.854	31.4192	-6.07729		0.093612	0.25691	0.0340017	0		0.0203114	0.107748	0.0281711	0.0357475
2015-07-14	11:33:05	00:00:05	42.3333	0.705556	26.13	26.1302	41.13	71.167	124.854	28.3752	46.2738	200								64.9101	110.854	20.4572	1.14011		0.10888	0.25691	0.0170843	0.000166472		0.0207405	0.108379	0.0281881	0.0356361
2015-07-14	11:33:10	00:00:05	42.4167	0.706944	26.13	26.1302	41.11	69.8242	131.006	35.791	32.3334	200								63.5673	117.006	27.873	-12.8003		0.10529	0.280159	0.0280591	0		0.021155	0.109137	0.028264	0.0355917
2015-07-14	11:33:15	00:00:05	42.5	0.708333	26.13	26.1302	41.16	73.2666	137.5	36.0962	43.4021	200								67.0097	123.5	28.1782	-1.73159		0.114584	0.305515	0.0285536	0		0.0216109	0.110021	0.0283257	0.0355016
2015-07-14	11:33:20	00:00:05	42.5833	0.709722	26.13	26.1302	41.21	76.9165	138.818	20.0195	45.9442	200								70.6596	124.818	12.1015	0.810509		0.124758	0.310762	0.00735992	9.63046e-05		0.0221017	0.111063	0.0283313	0.0354167
2015-07-14	11:33:25	00:00:05	42.6667	0.711111	26.13	26.1302	41.12	70.4956	141.553	40.0269	37.4603	200								64.2387	127.553	32.1089	-7.67339		0.107079	0.321756	0.0352068	0		0.0225207	0.112072	0.0284563	0.0353979
2015-07-14	11:33:30	00:00:05	42.75	0.7125	26.13	26.1302	41.14	71.8628	123.657	23.114	36.1877	200								65.6059	109.657	15.196	-8.94599		0.110758	0.252475	0.0106046	0		0.0229576	0.112676	0.0284463	0.0353892
2015-07-14	11:33:35	00:00:05	42.8333	0.713889	26.13	26.1302	41.09	68.4937	131.006	19.0094	36.438	200								62.2368	117.006	11.0914	-8.69569		0.101777	0.280159	0.00639967	0		0.0233579	0.11323	0.0284534	0.0352753
2015-07-14	11:33:40	00:00:05	42.9167	0.715278	26.13	26.1302	41.08	67.8467	129.761	24.4019	43.866	200								61.5898	115.761	16.4839	-1.26769		0.100085	0.275393	0.0120827	0		0.0237307	0.113898	0.0284888	0.0352507
2015-07-14	11:33:45	00:00:05	43	0.716667	26.13	26.1302	41.06	66.5771	133.569	26.4038	47.4487	200								60.3202	119.569	18.4858	2.31501		0.0967969	0.290068	0.0145214	0.000518492		0.0240981	0.114769	0.0285148	0.0352396
2015-07-14	11:33:50	00:00:05	43.0833	0.718056	26.13	26.1302	40.99	62.3413	129.761	28.3752	39.1937	200								56.0844	115.761	20.4572	-5.93999		0.0861275	0.275393	0.0170843	0		0.0244142	0.115618	0.0285652	0.0351714
2015-07-14	11:33:55	00:00:05	43.1667	0.719444	26.13	26.1302	40.98	61.7676	134.863	21.9086	57.5439	200								55.5107	120.863	13.9906	12.4102		0.0847187	0.295119	0.00928797	0.00766339		0.0247271	0.116511	0.0286024	0.0351557
2015-07-14	11:34:00	00:00:05	43.25	0.720833	26.13	26.1302	40.96	60.6323	131.006	26.4038	39.3311	200								54.3754	117.006	18.4858	-5.80259		0.0819567	0.280159	0.0145214	0		0.0250222	0.117429	0.0286581	0.0350953
2015-07-14	11:34:05	00:00:05	43.3333	0.722222	26.13	26.1302	40.94	59.5215	136.182	26.4038	50.6348	200								53.2646	122.182	18.4858	5.50111		0.0792878	0.300302	0.0145214	0.00207817		0.0253105	0.118034	0.0286841	0.0350656
2015-07-14	11:34:10	00:00:05	43.4167	0.723611	26.13	26.1302	40.92	58.4351	124.854	17.4194	46.4417	200								52.1782	110.854	9.5014	1.30801		0.0767099	0.25691	0.0049931	0.000207512		0.0255886	0.118722	0.0286711	0.0350261
2015-07-14	11:34:15	00:00:05	43.5	0.725	26.13	26.1302	40.98	61.7676	133.569	18.5944	43.4021	200								55.5107	119.569	10.6764	-1.73159		0.0847187	0.290068	0.00601995	0		0.0259015	0.119703	0.028661	0.0350175
2015-07-14	11:34:20	00:00:05	43.5833	0.726389	26.13	26.1302	40.96	60.6323	123.657	28.6072	30.8426	200								54.3754	109.657	20.6892	-14.2911		0.0819567	0.252475	0.0173961	0		0.0261966	0.120338	0.0287127	0.0349654
2015-07-14	11:34:25	00:00:05	43.6667	0.727778	26.13	26.1302	40.93	58.9722	122.485	33.7341	45.6177	200								52.7153	108.485	25.8161	0.484009		0.0779804	0.24816	0.0248126	4.21215e-05		0.0265004	0.120866	0.0287032	0.0348771
2015-07-14	11:34:30	00:00:05	43.75	0.729167	26.13	26.1302	40.95	60.0708	124.854	18.869	39.0564	200								53.8139	110.854	10.951	-6.07729		0.0806034	0.25691	0.00627023	0		0.0268227	0.121628	0.0287183	0.0348638
2015-07-14	11:34:35	00:00:05	43.8333	0.730556	26.13	26.1302	40.99	62.3413	126.074	36.7188	37.7228	200								56.0844	112.074	28.8008	-7.41089		0.0861275	0.26146	0.0295722	0		0.0271719	0.122473	0.0288149	0.0348046
2015-07-14	11:34:40	00:00:05	43.9167	0.731944	26.13	26.1302	41.02	64.1113	115.674	28.3752	44.4946	200								57.8544	101.674	20.4572	-0.639091		0.0905287	0.223647	0.0170843	0		0.0275474	0.123164	0.0288794	0.0347785
2015-07-14	11:34:45	00:00:05	44	0.733333	26.13	26.1302	40.95	60.0708	90.6494	40.0269	45.4559	200								53.8139	76.6494	32.1089	0.322209		0.0806034	0.142151	0.0352068	2.19307e-05		0.0278778	0.123489	0.0289776	0.0347484
2015-07-14	11:34:50	00:00:05	44.0833	0.734722	26.12	26.1301	40.91	57.9041	79.7852	27.6978	43.5547	200								51.6472	65.7852	19.7798	-1.57899		0.0754616	0.111244	0.016186	0		0.0281833	0.123755	0.0288822	0.0347448
2015-07-14	11:34:55	00:00:05	44.1667	0.736111	26.12	26.1301	40.88	56.3416	88.1836	28.8391	50.4517	200								50.0847	74.1836	20.9211	5.31801		0.0718333	0.134888	0.0177099	0.00196834		0.0284809	0.124035	0.0288349	0.0346821
2015-07-14	11:35:00	00:00:05	44.25	0.7375	26.12	26.13	40.9	57.373	92.3462	20.7794	35.4492	200								51.1161	78.3462	12.8614	-9.68449		0.0742208	0.147233	0.00811517	0		0.0287895	0.124455	0.0288037	0.0346484
2015-07-14	11:35:05	00:00:05	44.3333	0.738889	26.13	26.13	40.84	54.3396	91.4917	16.568	47.6196	200								48.0827	77.4917	8.65	2.48591		0.0672836	0.144665	0.0042951	0.000581243		0.0290663	0.124655	0.0288113	0.0345999
2015-07-14	11:35:10	00:00:05	44.4167	0.740278	26.13	26.13	40.78	51.5015	80.5054	23.8403	32.3334	200								45.2446	66.5054	15.9223	-12.8003		0.0610278	0.113204	0.0114292	0		0.0293119	0.124824	0.0288436	0.0345768
2015-07-14	11:35:15	00:00:05	44.5	0.741667	26.13	26.13	40.84	54.3396	80.5054	21.579	49.7253	200								48.0827	66.5054	13.661	4.59161		0.0672836	0.113204	0.0089395	0.00155522		0.0295756	0.124907	0.028852	0.0345712
2015-07-14	11:35:20	00:00:05	44.5833	0.743056	26.13	26.13	40.82	53.3691	95.8252	23.4741	35.817	200								47.1122	81.8252	15.5561	-9.31669		0.0651186	0.157859	0.0110105	0		0.0298202	0.125277	0.028834	0.0345699
2015-07-14	11:35:25	00:00:05	44.6667	0.744444	26.13	26.13	40.71	48.4192	99.4629	30.0354	42.3401	200								42.1623	85.4629	22.1174	-2.79359		0.0544976	0.169266	0.0193621	0		0.0300163	0.125535	0.0288863	0.0345446
2015-07-14	11:35:30	00:00:05	44.75	0.745833	26.13	26.13	40.71	48.4192	86.5845	32.3547	44.0216	200								42.1623	72.5845	24.4367	-1.11209		0.0544976	0.130255	0.0227206	0		0.0302051	0.125846	0.0289485	0.0345208
2015-07-14	11:35:35	00:00:05	44.8333	0.747222	26.13	26.13	40.7	47.998	92.3462	28.3752	41.4551	200								41.7411	78.3462	20.4572	-3.67859		0.053627	0.147233	0.0170843	0		0.0303776	0.126097	0.0290006	0.0344721
2015-07-14	11:35:40	00:00:05	44.9167	0.748611	26.13	26.13	40.75	50.1526	82.7271	24.0265	36.0641	200								43.8957	68.7271	16.1085	-9.06959		0.0581358	0.119331	0.0116444	0		0.0305673	0.126302	0.0290344	0.0344419
2015-07-14	11:35:45	00:00:05	45	0.75	26.13	26.13	40.75	50.1526	102.295	25.3784	54.8584	200								43.8957	88.295	17.4604	9.72471		0.0581358	0.178353	0.0132512	0.00518267		0.030743	0.126851	0.0290871	0.0343826
2015-07-14	11:35:50	00:00:05	45.0833	0.751389	26.13	26.13	40.71	48.4192	85.791	30.0354	58.6151	200								42.1623	71.791	22.1174	13.4814		0.0544976	0.127978	0.0193621	0.00875175		0.0309141	0.127221	0.0291305	0.0344114
2015-07-14	11:35:55	00:00:05	45.1667	0.752778	26.13	26.13	40.69	47.583	108.252	37.3535	65.7837	200								41.3261	94.252	29.4355	20.65		0.0527743	0.198044	0.0306245	0.0173433		0.0310831	0.127753	0.0292556	0.034473
2015-07-14	11:36:00	00:00:05	45.25	0.754167	26.13	26.13	40.66	46.3623	110.303	20.4712	39.6057	200								40.1054	96.303	12.5532	-5.52799		0.0502963	0.205002	0.00780551	0		0.0312478	0.128293	0.029265	0.0344088
2015-07-14	11:36:05	00:00:05	45.3333	0.755556	26.13	26.13	40.73	49.2798	101.343	21.9086	59.7107	200								43.0229	87.343	13.9906	14.577		0.0562928	0.175279	0.00928797	0.00992027		0.0314306	0.128698	0.0292705	0.0344482
2015-07-14	11:36:10	00:00:05	45.4167	0.756944	26.13	26.13	40.74	49.7131	104.248	11.94	57.3303	200								43.4562	90.248	4.022	12.1966		0.057205	0.184723	0.00125755	0.00745293		0.0316358	0.129303	0.0291525	0.0344793
2015-07-14	11:36:15	00:00:05	45.5	0.758333	26.13	26.13	40.72	48.8464	110.303	18.4601	57.3303	200								42.5895	96.303	10.5421	12.1966		0.055386	0.205002	0.00589895	0.00745293		0.0318258	0.129922	0.0291413	0.034481
2015-07-14	11:36:20	00:00:05	45.5833	0.759722	26.13	26.13	40.67	46.7651	101.343	14.5081	59.0515	200								40.5082	87.343	6.5901	13.9178		0.051109	0.175279	0.00277653	0.00921058		0.0319953	0.130455	0.0291361	0.0345031
2015-07-14	11:36:25	00:00:05	45.6667	0.761111	26.13	26.13	40.68	47.168	97.6318	16.2201	70.6604	200								40.9111	83.6318	8.3021	25.5267		0.0519269	0.163487	0.0040214	0.0243679		0.032174	0.130787	0.0290339	0.0345858
2015-07-14	11:36:30	00:00:05	45.75	0.7625	26.13	26.13	40.63	45.1782	89.0015	27.0386	78.595	200								38.9213	75.0015	19.1206	33.4613		0.0479357	0.137281	0.0153295	0.0376154		0.0323195	0.131143	0.0289404	0.0346783
2015-07-14	11:36:35	00:00:05	45.8333	0.763889	26.13	26.13	40.55	42.2058	101.343	17.9291	72.0093	200								35.9489	87.343	10.0111	26.8756		0.0422006	0.175279	0.00542965	0.0264661		0.0324072	0.131591	0.028898	0.0347648
2015-07-14	11:36:40	00:00:05	45.9167	0.765278	26.13	26.13	40.57	42.9199	104.248	14.7095	82.2937	200								36.663	90.248	6.7915	37.16		0.0435532	0.184723	0.00291388	0.0445042		0.0325504	0.132129	0.0288415	0.0349165
2015-07-14	11:36:45	00:00:05	46	0.766667	26.13	26.13	40.51	40.8081	105.225	17.9291	71.1975	200								34.5512	91.225	10.0111	26.0638		0.0395999	0.187941	0.00542965	0.0251956		0.0326539	0.132809	0.0287387	0.0350213
2015-07-14	11:36:50	00:00:05	46.0833	0.768056	26.13	26.13	40.5	40.4663	97.6318	17.0486	68.042	200								34.2094	83.6318	9.1306	22.9083		0.0389734	0.163487	0.00468425	0.0204846		0.0327226	0.133297	0.0287331	0.0349755
2015-07-14	11:36:55	00:00:05	46.1667	0.769444	26.13	26.13	40.45	38.8245	89.8193	17.8009	72.0093	200								32.5676	75.8193	9.8829	26.8756		0.036017	0.13969	0.00531856	0.0264661		0.0328061	0.133571	0.0287258	0.0349053
2015-07-14	11:37:00	00:00:05	46.25	0.770833	26.13	26.13	40.39	36.9629	94.9463	16.2201	76.8127	200								30.706	80.9463	8.3021	31.679		0.0327721	0.155148	0.0040214	0.0344538		0.0328661	0.134078	0.0286462	0.0350034
2015-07-14	11:37:05	00:00:05	46.3333	0.772222	26.12	26.13	40.47	39.4714	81.2378	18.3258	102.258	200								33.2145	67.2378	10.4078	57.1243		0.0371713	0.11521	0.00577887	0.0887034		0.0329768	0.134375	0.0285867	0.0352994
2015-07-14	11:37:10	00:00:05	46.4167	0.773611	26.12	26.13	40.39	36.9629	85.0098	18.1915	92.041	200								30.706	71.0098	10.2735	46.9073		0.0327721	0.125752	0.00565973	0.064665		0.0330719	0.134726	0.0285723	0.0355132
2015-07-14	11:37:15	00:00:05	46.5	0.775	26.12	26.1299	40.34	35.4919	77.6489	17.8009	110.62	200								29.235	63.6489	9.8829	65.4863		0.0302905	0.105507	0.00531856	0.110434		0.0331592	0.134916	0.0285412	0.0359142
2015-07-14	11:37:20	00:00:05	46.5833	0.776389	26.12	26.1299	40.41	37.5671	91.4917	27.6978	141.504	200								31.3102	77.4917	19.7798	96.3703		0.0338126	0.144665	0.016186	0.205232		0.0332545	0.13521	0.0285887	0.0367424
2015-07-14	11:37:25	00:00:05	46.6667	0.777778	26.12	26.1298	40.46	39.1479	93.2007	36.7188	109.753	200								32.891	79.2007	28.8008	64.6193		0.0365923	0.149817	0.0295722	0.108099		0.0333649	0.135638	0.0287112	0.0371675
2015-07-14	11:37:30	00:00:05	46.75	0.779167	26.12	26.1298	40.29	34.1003	94.0674	13.6429	89.5752	200								27.8434	80.0674	5.7249	44.4415		0.0280113	0.152455	0.00221543	0.0592997		0.0334496	0.136037	0.0286171	0.0373996
2015-07-14	11:37:35	00:00:05	46.8333	0.780556	26.12	26.1298	40.39	36.9629	94.9463	18.1915	84.2102	200								30.706	80.9463	10.2735	39.0765		0.0327721	0.155148	0.00565973	0.0482428		0.0335419	0.136439	0.0286112	0.0375602
2015-07-14	11:37:40	00:00:05	46.9167	0.781944	26.12	26.1297	40.31	34.6497	101.343	31.8176	76.8127	200								28.3928	87.343	23.8996	31.679		0.0289031	0.175279	0.0219249	0.0344538		0.0336253	0.137043	0.028666	0.0376573
2015-07-14	11:37:45	00:00:05	47	0.783333	26.12	26.1297	40.34	35.4919	101.343	14.6088	128.583	200								29.235	87.343	6.6908	83.4493		0.0302905	0.175279	0.00284489	0.162915		0.0336973	0.137486	0.0286392	0.0382537
2015-07-14	11:37:50	00:00:05	47.0833	0.784722	26.12	26.1296	40.26	33.2947	96.7285	20.4712	90.979	200								27.0378	82.7285	12.5532	45.8453		0.0267227	0.160664	0.00780551	0.0623328		0.033771	0.137919	0.0286232	0.0384815
2015-07-14	11:37:55	00:00:05	47.1667	0.786111	26.13	26.1296	40.23	32.5195	104.248	13.736	115.527	200								26.2626	90.248	5.818	70.3933		0.0255045	0.184723	0.00227351	0.124005		0.0338331	0.138473	0.0285292	0.0389744
2015-07-14	11:38:00	00:00:05	47.25	0.7875	26.13	26.1296	40.2	31.7627	103.271	18.0603	107.19	200								25.5058	89.271	10.1423	62.0563		0.0243359	0.181526	0.00554424	0.101304		0.0338997	0.138989	0.0284202	0.0393542
2015-07-14	11:38:05	00:00:05	47.3333	0.788889	26.13	26.1296	40.18	31.2683	106.226	7.87201	108.459	200								25.0114	92.226	-0.04599	63.3253		0.0235837	0.19126	0	0.104648		0.0339627	0.139578	0.0283946	0.0397518
2015-07-14	11:38:10	00:00:05	47.4167	0.790278	26.13	26.1296	40.29	34.1003	104.248	17.0486	82.2937	200								27.8434	90.248	9.1306	37.16		0.0280113	0.184723	0.00468425	0.0445042		0.0340452	0.14008	0.0283647	0.0399087
2015-07-14	11:38:15	00:00:05	47.5	0.791667	26.13	26.1296	40.27	33.5632	105.225	17.1722	130.127	200								27.3063	91.225	9.2542	84.9933		0.0271496	0.187941	0.00478638	0.167777		0.0341283	0.140596	0.0283585	0.0405833
2015-07-14	11:38:20	00:00:05	47.5833	0.793056	26.13	26.1296	40.15	30.5481	87.3779	26.6113	111.938	200								24.2912	73.3779	18.6933	66.8043		0.0225039	0.132546	0.0147837	0.114021		0.0342072	0.140984	0.0283669	0.0410462
2015-07-14	11:38:25	00:00:05	47.6667	0.794444	26.13	26.1296	40.34	35.4919	91.4917	18.3258	75.9399	200								29.235	77.4917	10.4078	30.8062		0.0302905	0.144665	0.00577887	0.0329439		0.0343137	0.141375	0.0283786	0.0411565
2015-07-14	11:38:30	00:00:05	47.75	0.795833	26.13	26.1296	40.21	32.0099	87.3779	23.2941	74.5117	200								25.753	73.3779	15.3761	29.378		0.0247153	0.132546	0.0108069	0.0305286		0.0343929	0.141788	0.0283663	0.0412584
2015-07-14	11:38:35	00:00:05	47.8333	0.797222	26.13	26.1296	40.2	31.7627	78.3569	11.4075	130.646	200								25.5058	64.3569	3.4895	85.5123		0.0243359	0.107395	0.00100136	0.169423		0.0344442	0.141788	0.0283211	0.0419341
2015-07-14	11:38:40	00:00:05	47.9167	0.798611	26.13	26.1296	40.16	30.7861	101.343	15.4419	88.2019	200								24.5292	87.343	7.5239	43.0682		0.0228586	0.175279	0.00343411	0.056388		0.0344959	0.142307	0.0282895	0.0420867
2015-07-14	11:38:45	00:00:05	48	0.8	26.13	26.1296	40.17	31.0272	85.791	16.452	108.887	200								24.7703	71.791	8.534	63.7533		0.0232201	0.127978	0.00420308	0.105784		0.0345568	0.142691	0.0281772	0.0424882
2015-07-14	11:38:50	00:00:05	48.0833	0.801389	26.13	26.1296	40.18	31.2683	81.2378	21.579	120.19	200								25.0114	67.2378	13.661	75.0563		0.0235837	0.11521	0.0089395	0.137442		0.0346186	0.143066	0.0280954	0.0430323
2015-07-14	11:38:55	00:00:05	48.1667	0.802778	26.12	26.1296	40.16	30.7861	81.9824	11.7844	105.103	200								24.5292	67.9824	3.8664	59.9693		0.0228586	0.117264	0.00118043	0.0958953		0.0346833	0.143297	0.0280527	0.0434202
2015-07-14	11:39:00	00:00:05	48.25	0.804167	26.12	26.1295	40.29	34.1003	87.3779	13.0142	122.107	200								27.8434	73.3779	5.0962	76.9733		0.0280113	0.132546	0.00183833	0.143116		0.0347774	0.143577	0.0280062	0.0439536
2015-07-14	11:39:05	00:00:05	48.3333	0.805556	26.12	26.1295	40.24	32.7759	84.2407	20.4712	88.8855	200								26.519	70.2407	12.5532	43.7518		0.025905	0.123574	0.00780551	0.0578305		0.0348705	0.143942	0.0280115	0.0440263
2015-07-14	11:39:10	00:00:05	48.4167	0.806944	26.12	26.1295	40.17	31.0272	76.9531	14.3097	87.5244	200								24.7703	62.9531	6.3917	42.3907		0.0232201	0.103663	0.00264367	0.054972		0.0349495	0.144191	0.0279953	0.044145
2015-07-14	11:39:15	00:00:05	48.5	0.808333	26.12	26.1294	40.19	31.5125	84.2407	14.5081	81.0364	200								25.2556	70.2407	6.5901	35.9027		0.0239541	0.123574	0.00277653	0.0421137		0.0350292	0.144559	0.0279861	0.0443055
2015-07-14	11:39:20	00:00:05	48.5833	0.809722	26.12	26.1294	40.1	29.3945	71.0205	18.1915	109.753	200								23.1376	57.0205	10.2735	64.6193		0.0208145	0.088445	0.00565973	0.108099		0.0351045	0.144838	0.0279709	0.044735
2015-07-14	11:39:25	00:00:05	48.6667	0.811111	26.12	26.1293	40.15	30.5481	80.5054	15.9927	94.2139	200								24.2912	66.5054	8.0747	49.0802		0.0225039	0.113204	0.00384618	0.0695366		0.0351916	0.145213	0.0279411	0.0449771
2015-07-14	11:39:30	00:00:05	48.75	0.8125	26.12	26.1293	40.16	30.7861	65.625	8.87451	66.2781	200								24.5292	51.625	0.95651	21.1444		0.0228586	0.0754096	0.00012561	0.0180141		0.0352812	0.145431	0.0279058	0.0450431
2015-07-14	11:39:35	00:00:05	48.8333	0.813889	26.12	26.1293	40.11	29.6204	67.9688	20.0195	124.561	200								23.3635	53.9688	12.1015	79.4273		0.0211414	0.080976	0.00735992	0.150505		0.0353578	0.145491	0.0279169	0.0456408
2015-07-14	11:39:40	00:00:05	48.9167	0.815278	26.12	26.1292	40.07	28.7292	71.6553	23.8403	70.3918	200								22.4723	57.6553	15.9223	25.2581		0.0198628	0.0900296	0.0114292	0.023958		0.0354338	0.145676	0.0279123	0.0456357
2015-07-14	11:39:45	00:00:05	49	0.816667	26.12	26.1292	40.03	27.8748	72.937	14.4073	66.7786	200								21.6179	58.937	6.4893	21.6449		0.0186655	0.0932613	0.00270872	0.0187029		0.0355062	0.145878	0.0278457	0.0456671
2015-07-14	11:39:50	00:00:05	49.0833	0.818056	26.12	26.1291	40.14	30.3162	68.5669	17.2943	67.7887	200								24.0593	54.5669	9.3763	22.655		0.0221603	0.0824202	0.00488807	0.0201225		0.0355965	0.145934	0.027768	0.0457321
2015-07-14	11:39:55	00:00:05	49.1667	0.819444	26.12	26.1291	40.1	29.3945	64.4958	13.4598	84.5398	200								23.1376	50.4958	5.5418	39.4061		0.0208145	0.0727815	0.00210288	0.0488971		0.0356768	0.146022	0.0276351	0.0459105
2015-07-14	11:40:00	00:00:05	49.25	0.820833	26.12	26.129	40.14	30.3162	62.3047	14.4073	76.5198	200								24.0593	48.3047	6.4893	31.3861		0.0221603	0.0677826	0.00270872	0.0339442		0.035763	0.146143	0.0275096	0.0459851
2015-07-14	11:40:05	00:00:05	49.3333	0.822222	26.12	26.129	40.17	31.0272	54.3701	27.0386	77.6978	200								24.7703	40.3701	19.1206	32.5641		0.0232201	0.0508299	0.0153295	0.0360108		0.0358485	0.146269	0.027506	0.0461041
2015-07-14	11:40:10	00:00:05	49.4167	0.823611	26.13	26.129	40.19	31.5125	66.1987	26.1932	58.6151	200								25.2556	52.1987	18.2752	13.4814		0.0239541	0.0767583	0.0142569	0.00875175		0.035934	0.146362	0.0274992	0.0460457
2015-07-14	11:40:15	00:00:05	49.5	0.825	26.13	26.129	40.16	30.7861	71.6553	24.0265	62.6648	200								24.5292	57.6553	16.1085	17.5311		0.0228586	0.0900296	0.0116444	0.0133374		0.036019	0.146642	0.0274266	0.0460304
2015-07-14	11:40:20	00:00:05	49.5833	0.826389	26.13	26.129	40.22	32.2632	57.1899	31.8176	69.8608	200								26.0063	43.1899	23.8996	24.7271		0.0251064	0.0566438	0.0219249	0.0231552		0.0361229	0.146803	0.0273948	0.0459585
2015-07-14	11:40:25	00:00:05	49.6667	0.827778	26.13	26.129	40.16	30.7861	54.8279	10.363	66.2781	200								24.5292	40.8279	2.445	21.1444		0.0228586	0.0517576	0.000565977	0.0180141		0.036216	0.146858	0.0273058	0.0459303
2015-07-14	11:40:30	00:00:05	49.75	0.829167	26.13	26.129	40.2	31.7627	57.1899	10.2982	55.8746	200								25.5058	43.1899	2.3802	10.7409		0.0243359	0.0566438	0.00054211	0.0060784		0.0363112	0.146801	0.0271209	0.0457547
2015-07-14	11:40:35	00:00:05	49.8333	0.830556	26.13	26.129	40.26	33.2947	80.5054	8.98285	61.0535	200								27.0378	66.5054	1.06485	15.9198		0.0267227	0.113204	0.0001492	0.0114264		0.0364166	0.147162	0.0270181	0.0455847
2015-07-14	11:40:40	00:00:05	49.9167	0.831944	26.12	26.129	40.24	32.7759	56.7139	16.806	47.4487	200								26.519	42.7139	8.888	2.31501		0.025905	0.0556458	0.00448622	0.000518492		0.0365124	0.147218	0.0268901	0.0454766
2015-07-14	11:40:45	00:00:05	50	0.833333	26.12	26.1289	40.31	34.6497	50.4456	12.587	52.6978	200								28.3928	36.4456	4.669	7.56411		0.0289031	0.0431398	0.00159748	0.00346359		0.0366262	0.147269	0.0265583	0.0450959
2015-07-14	11:40:50	00:00:05	50.0833	0.834722	26.12	26.1289	40.29	34.1003	57.6782	13.4598	48.8373	200								27.8434	43.6782	5.5418	3.70361		0.0280113	0.0576745	0.00210288	0.00110173		0.0367161	0.147312	0.0263021	0.0445997
2015-07-14	11:40:55	00:00:05	50.1667	0.836111	26.12	26.1289	40.36	36.0718	61.2366	15.9927	45.1324	200								29.8149	47.2366	8.0747	-0.00129091		0.0312601	0.0653946	0.00384618	0		0.036842	0.14734	0.026103	0.0443933
2015-07-14	11:41:00	00:00:05	50.25	0.8375	26.12	26.1289	40.34	35.4919	41.8945	18.7317	61.969	200								29.235	27.8945	10.8137	16.8353		0.0302905	0.0280938	0.00614461	0.0124985		0.0369661	0.147366	0.0260137	0.0443537
2015-07-14	11:41:05	00:00:05	50.3333	0.838889	26.12	26.1288	40.44	38.5071	48.8159	18.7317	60.1532	200								32.2502	34.8159	10.8137	15.0195		0.0354556	0.0400877	0.00614461	0.0104077		0.0371102	0.14749	0.0259264	0.0442381
2015-07-14	11:41:10	00:00:05	50.4167	0.840278	26.12	26.1288	40.51	40.8081	42.5659	17.4194	55.0598	200								34.5512	28.5659	9.5014	9.92611		0.0395999	0.0291863	0.0049931	0.00535591		0.0372712	0.147543	0.0258383	0.0440429
2015-07-14	11:41:15	00:00:05	50.5	0.841667	26.12	26.1288	40.48	39.801	57.1899	16.687	44.6533	200								33.5441	43.1899	8.769	-0.480391		0.0377648	0.0566438	0.00439027	0		0.0374253	0.14767	0.0256758	0.0434344
2015-07-14	11:41:20	00:00:05	50.5833	0.843056	26.12	26.1287	40.49	40.1367	39.9658	24.4019	63.8428	200								33.8798	25.9658	16.4839	18.7091		0.0383728	0.0250438	0.0120827	0.0148038		0.0375772	0.1477	0.0255768	0.0430159
2015-07-14	11:41:25	00:00:05	50.6667	0.844444	26.12	26.1287	40.59	43.6584	38.147	17.2943	58.6151	200								37.4015	24.147	9.3763	13.4814		0.0449689	0.0222901	0.00488807	0.00875175		0.037761	0.147727	0.0254761	0.0425773
2015-07-14	11:41:30	00:00:05	50.75	0.845833	26.12	26.1286	40.6	44.0308	55.2917	13.1897	51.9348	200								37.7739	41.2917	5.2717	6.80111		0.0456893	0.0527039	0.00194092	0.0029205		0.0379494	0.147684	0.0253752	0.0418904
2015-07-14	11:41:35	00:00:05	50.8333	0.847222	26.12	26.1286	40.59	43.6584	56.7139	15.9927	63.8428	200								37.4015	42.7139	8.0747	18.7091		0.0449689	0.0556458	0.00384618	0.0148038		0.038128	0.147662	0.0252197	0.0416693
2015-07-14	11:41:40	00:00:05	50.9167	0.848611	26.12	26.1285	40.52	41.1499	50.8667	11.557	46.9421	200								34.893	36.8667	3.639	1.80841		0.0402301	0.0439421	0.00107106	0.000348902		0.0382867	0.1476	0.0250235	0.0412393
2015-07-14	11:41:45	00:00:05	51	0.85	26.12	26.1285	40.6	44.0308	47.2473	15.0177	53.0823	200								37.7739	33.2473	7.0997	7.94861		0.0456893	0.0372303	0.00312888	0.0037503		0.0384647	0.147715	0.0248019	0.0408509
2015-07-14	11:41:50	00:00:05	51.0833	0.851389	26.12	26.1285	40.66	46.3623	35.8765	15.1215	77.6978	200								40.1054	21.8765	7.2035	32.5641		0.0502963	0.019025	0.00320257	0.0360108		0.0386686	0.147734	0.0246111	0.0403354
2015-07-14	11:41:55	00:00:05	51.1667	0.852778	26.12	26.1284	40.7	47.998	37.851	20.4712	63.1348	200								41.7411	23.851	12.5532	18.0011		0.053627	0.0218534	0.00780551	0.0139155		0.0388891	0.147701	0.0243921	0.039392
2015-07-14	11:42:00	00:00:05	51.25	0.854167	26.13	26.1284	40.81	52.8931	33.7708	20.9381	51.5594	200								46.6362	19.7708	13.0201	6.42571		0.0640665	0.0161742	0.00827638	0.00266627		0.0391537	0.147624	0.0242489	0.038859
2015-07-14	11:42:05	00:00:05	51.3333	0.855556	26.12	26.1284	40.81	52.8931	42.9016	20.0195	53.4729	200								46.6362	28.9016	12.1015	8.33921		0.0640665	0.0297384	0.00735992	0.00405027		0.0394153	0.147681	0.0241329	0.0385756
2015-07-14	11:42:10	00:00:05	51.4167	0.856944	26.13	26.1284	40.82	53.3691	46.8628	15.6586	50.0854	200								47.1122	32.8628	7.7406	4.95171		0.0651186	0.0365421	0.00359413	0.00175544		0.0396794	0.147749	0.023985	0.0380218
2015-07-14	11:42:15	00:00:05	51.5	0.858333	26.13	26.1284	40.86	55.3345	55.2917	35.4858	52.5085	200								49.0776	41.2917	27.5678	7.37481		0.0695306	0.0527039	0.0275679	0.00332561		0.0399641	0.147864	0.0239094	0.0375556
2015-07-14	11:42:20	00:00:05	51.5833	0.859722	26.13	26.1284	40.9	57.373	28.7415	18.869	53.4729	200								51.1161	14.7415	10.951	8.33921		0.0742208	0.0101004	0.00627023	0.00405027		0.0402713	0.147804	0.0237579	0.0370504
2015-07-14	11:42:25	00:00:05	51.6667	0.861111	26.12	26.1283	40.95	60.0708	32.0587	24.7864	53.0823	200								53.8139	18.0587	16.8684	7.94861		0.0806034	0.013987	0.0125379	0.0037503		0.0405965	0.147796	0.0236293	0.0356847
2015-07-14	11:42:30	00:00:05	51.75	0.8625	26.12	26.1283	40.97	61.1938	33.0261	30.2856	78.2959	200								54.9369	19.0261	22.3676	33.1622		0.0833184	0.0152081	0.0197146	0.0370776		0.0409203	0.147704	0.0234964	0.0354396
2015-07-14	11:42:35	00:00:05	51.8333	0.863889	26.12	26.1283	40.92	58.4351	32.2968	22.0764	41.0187	200								52.1782	18.2968	14.1584	-4.11499		0.0767099	0.014284	0.0094673	0		0.0412266	0.147597	0.0233316	0.0347674
2015-07-14	11:42:40	00:00:05	51.9167	0.865278	26.12	26.1282	40.79	51.9653	40.5945	17.6727	53.0823	200								45.7084	26.5945	9.7547	7.94861		0.0620344	0.0260235	0.00520833	0.0037503		0.0414774	0.147547	0.023257	0.0331423
2015-07-14	11:42:45	00:00:05	52	0.866667	26.11	26.1281	40.78	51.5015	36.4258	15.2283	64.0808	200								45.2446	22.4258	7.3103	18.9471		0.0610278	0.019797	0.00327907	0.015107		0.0417123	0.147558	0.02319	0.0325592
2015-07-14	11:42:50	00:00:05	52.0833	0.868056	26.11	26.128	40.81	52.8931	21.5118	20.1691	54.8584	200								46.6362	7.5118	12.2511	9.72471		0.0640665	0.00342525	0.00750641	0.00518267		0.0419696	0.14714	0.0231215	0.0307506
2015-07-14	11:42:55	00:00:05	52.1667	0.869444	26.12	26.128	40.79	51.9653	24.4537	21.579	50.4517	200								45.7084	10.4537	13.661	5.31801		0.0620344	0.0058198	0.0089395	0.00196834		0.0422134	0.146856	0.023017	0.0299196
2015-07-14	11:43:00	00:00:05	52.25	0.870833	26.12	26.128	40.7	47.998	43.9392	21.7438	57.9712	200								41.7411	29.9392	13.8258	12.8375		0.053627	0.0314694	0.00911311	0.008091		0.0424143	0.146807	0.0229967	0.029351
2015-07-14	11:43:05	00:00:05	52.3333	0.872222	26.12	26.1279	40.72	48.8464	27.9297	17.0486	50.2686	200								42.5895	13.9297	9.1306	5.13491		0.055386	0.00922321	0.00468425	0.00186077		0.0426302	0.14672	0.0229511	0.0286932
2015-07-14	11:43:10	00:00:05	52.4167	0.873611	26.12	26.1279	40.72	48.8464	32.5378	27.0386	44.1772	200								42.5895	18.5378	19.1206	-0.956491		0.055386	0.014587	0.0153295	0		0.0428515	0.146716	0.0229001	0.0274166
2015-07-14	11:43:15	00:00:05	52.5	0.875	26.12	26.1278	40.67	46.7651	19.0079	23.4741	55.6702	200								40.5082	5.0079	15.5561	10.5365		0.051109	0.0017875	0.0110105	0.00589393		0.0430559	0.146589	0.0228821	0.0269508
2015-07-14	11:43:20	00:00:05	52.5833	0.876389	26.13	26.1278	40.67	46.7651	24.6216	30.7861	52.89	200								40.5082	10.6216	22.8681	7.75631		0.051109	0.00597046	0.020427	0.00360584		0.0432646	0.146431	0.0229079	0.0260357
2015-07-14	11:43:25	00:00:05	52.6667	0.877778	26.13	26.1278	40.56	42.5598	26.5808	22.2473	67.7887	200								36.3029	12.5808	14.3293	22.655		0.0428691	0.00783306	0.00965126	0.0201225		0.043438	0.146196	0.0228291	0.0253419
2015-07-14	11:43:30	00:00:05	52.75	0.879167	26.12	26.1278	40.53	41.4978	39.3433	17.5446	63.3667	200								35.2409	25.3433	9.6266	18.233		0.0408754	0.0240877	0.00509906	0.0142042		0.0435876	0.146081	0.0226875	0.0241906
2015-07-14	11:43:35	00:00:05	52.8333	0.880556	26.12	26.1278	40.5	40.4663	34.8022	30.2856	49.7253	200								34.2094	20.8022	22.3676	4.59161		0.0389734	0.0175488	0.0197146	0.00155522		0.0437169	0.146065	0.0226177	0.023664
2015-07-14	11:43:40	00:00:05	52.9167	0.881944	26.12	26.1277	40.49	40.1367	41.2354	18.4601	63.6047	200								33.8798	27.2354	10.5421	18.471		0.0383728	0.0270367	0.00589895	0.0145027		0.0438587	0.145815	0.0225352	0.0227857
2015-07-14	11:43:45	00:00:05	53	0.883333	26.12	26.1277	40.46	39.1479	57.6782	18.869	64.3219	200								32.891	43.6782	10.951	19.1882		0.0365923	0.0576745	0.00627023	0.0154165		0.0439857	0.145941	0.0223927	0.0218934
2015-07-14	11:43:50	00:00:05	53.0833	0.884722	26.12	26.1276	40.54	41.8518	52.1484	28.8391	37.0728	200								35.5949	38.1484	20.9211	-8.06089		0.041536	0.0464181	0.0177099	0		0.0441311	0.145881	0.0222192	0.0215026
2015-07-14	11:43:55	00:00:05	53.1667	0.886111	26.12	26.1276	40.48	39.801	46.1121	41.8213	55.4657	200								33.5441	32.1121	33.9033	10.332		0.0377648	0.0352124	0.0384156	0.00571152		0.0442564	0.145735	0.0221921	0.0210563
2015-07-14	11:44:00	00:00:05	53.25	0.8875	26.11	26.1275	40.44	38.5071	45.3735	43.7134	50.2686	200								32.2502	31.3735	35.7954	5.13491		0.0354556	0.0339224	0.041912	0.00186077		0.0443647	0.145675	0.0221626	0.0200718
2015-07-14	11:44:05	00:00:05	53.3333	0.888889	26.12	26.1275	40.54	41.8518	40.2771	32.3547	61.5082	200								35.5949	26.2771	24.4367	16.3745		0.041536	0.0255271	0.0227206	0.0119543		0.0444781	0.1454	0.0221592	0.0198142
2015-07-14	11:44:10	00:00:05	53.4167	0.890278	26.12	26.1274	40.39	36.9629	48.4192	27.0386	41.1621	200								30.706	34.4192	19.1206	-3.97159		0.0327721	0.0393575	0.0153295	0		0.0445306	0.145315	0.0221041	0.0192975
2015-07-14	11:44:15	00:00:05	53.5	0.891667	26.12	26.1274	40.47	39.4714	42.5659	38.6597	49.9054	200								33.2145	28.5659	30.7417	4.77171		0.0371713	0.0291863	0.0328333	0.00165422		0.0446053	0.145178	0.0220967	0.0188636
2015-07-14	11:44:20	00:00:05	53.5833	0.893056	26.12	26.1273	40.45	38.8245	33.2703	32.8979	44.0216	200								32.5676	19.2703	24.9799	-1.11209		0.036017	0.0155225	0.0235361	0		0.0446491	0.145091	0.022048	0.0186227
2015-07-14	11:44:25	00:00:05	53.6667	0.894444	26.12	26.1273	40.57	42.9199	45.3735	20.3186	61.0535	200								36.663	31.3735	12.4006	15.9198		0.0435532	0.0339224	0.00765388	0.0114264		0.0447438	0.144918	0.0219226	0.0179364
2015-07-14	11:44:30	00:00:05	53.75	0.895833	26.13	26.1273	40.53	41.4978	37.851	30.2856	52.5085	200								35.2409	23.851	22.3676	7.37481		0.0408754	0.0218534	0.0197146	0.00332561		0.0448352	0.144634	0.0218302	0.0176127
2015-07-14	11:44:35	00:00:05	53.8333	0.897222	26.12	26.1273	40.61	44.4092	38.739	29.5502	52.5085	200								38.1523	24.739	21.6322	7.37481		0.0464256	0.0231731	0.0186853	0.00332561		0.0449445	0.144422	0.0217663	0.0174437
2015-07-14	11:44:40	00:00:05	53.9167	0.898611	26.13	26.1273	40.59	43.6584	44.2932	27.9236	47.11	200								37.4015	30.2932	20.0056	1.97631		0.0449689	0.0320684	0.0164834	0.0004023		0.0450491	0.144315	0.0216634	0.0172548
2015-07-14	11:44:45	00:00:05	54	0.9	26.12	26.1272	40.68	47.168	56.7139	42.5659	43.866	200								40.9111	42.7139	34.6479	-1.26769		0.0519269	0.0556458	0.0397778	0		0.0451969	0.144032	0.0216799	0.0168234
2015-07-14	11:44:50	00:00:05	54.0833	0.901389	26.12	26.1272	40.72	48.8464	52.1484	36.7188	47.2809	200								42.5895	38.1484	28.8008	2.14721		0.055386	0.0464181	0.0295722	0.000459543		0.0453511	0.143815	0.021671	0.0167305
2015-07-14	11:44:55	00:00:05	54.1667	0.902778	26.12	26.1271	40.72	48.8464	55.7617	28.6072	44.1772	200								42.5895	41.7617	20.6892	-0.956491		0.055386	0.0536695	0.0173961	0		0.0454951	0.143708	0.021671	0.0166555
2015-07-14	11:45:00	00:00:05	54.25	0.904167	26.12	26.1271	40.75	50.1526	60.1929	27.478	43.2495	200								43.8957	46.1929	19.56	-1.88419		0.0581358	0.0630925	0.0158985	0		0.045626	0.143698	0.0216073	0.0165487
2015-07-14	11:45:05	00:00:05	54.3333	0.905556	26.12	26.127	40.81	52.8931	59.6802	36.7188	53.6682	200								46.6362	45.6802	28.8008	8.53451		0.0640665	0.0619731	0.0295722	0.00420349		0.0457833	0.143607	0.0215889	0.0165186
2015-07-14	11:45:10	00:00:05	54.4167	0.906944	26.12	26.127	40.74	49.7131	71.0205	39.0015	62.8967	200								43.4562	57.0205	31.0835	17.763		0.057205	0.088445	0.0334208	0.0136215		0.0459104	0.14365	0.0216192	0.016532
2015-07-14	11:45:15	00:00:05	54.5	0.908333	26.12	26.127	40.77	51.0498	62.3047	36.4075	54.2603	200								44.7929	48.3047	28.4895	9.12661		0.0600535	0.0677826	0.0290612	0.00468097		0.046051	0.143469	0.0216456	0.0163283
2015-07-14	11:45:20	00:00:05	54.5833	0.909722	26.13	26.127	40.75	50.1526	71.6553	50.4883	62.4329	200								43.8957	57.6553	42.5703	17.2992		0.0581358	0.0900296	0.055346	0.0130555		0.0461358	0.143475	0.0217046	0.0163171
2015-07-14	11:45:25	00:00:05	54.6667	0.911111	26.12	26.1269	40.75	50.1526	67.3706	37.677	52.89	200								43.8957	53.3706	29.759	7.75631		0.0581358	0.0795411	0.0311661	0.00360584		0.0462131	0.143397	0.0216473	0.0161591
2015-07-14	11:45:30	00:00:05	54.75	0.9125	26.12	26.1268	40.67	46.7651	53.9185	29.0741	41.0187	200								40.5082	39.9185	21.1561	-4.11499		0.051109	0.0499209	0.0180301	0		0.0462661	0.143181	0.0215252	0.0161583
2015-07-14	11:45:35	00:00:05	54.8333	0.913889	26.12	26.1268	40.59	43.6584	62.3047	50.9521	52.5085	200								37.4015	48.3047	43.0341	7.37481		0.0449689	0.0677826	0.0563164	0.00332561		0.0462859	0.143046	0.0215485	0.0161498
2015-07-14	11:45:40	00:00:05	54.9167	0.915278	26.12	26.1268	40.59	43.6584	56.2317	38.6597	48.6603	200								37.4015	42.2317	30.7417	3.52661		0.0449689	0.0546416	0.0328333	0.0010185		0.0463184	0.14297	0.0215333	0.0161526
2015-07-14	11:45:45	00:00:05	55	0.916667	26.12	26.1267	40.69	47.583	51.7151	29.5502	50.4517	200								41.3261	37.7151	21.6322	5.31801		0.0527743	0.0455753	0.0186853	0.00196834		0.0463974	0.142743	0.0214791	0.0161526
2015-07-14	11:45:50	00:00:05	55.0833	0.918056	26.12	26.1267	40.52	41.1499	70.3979	33.1726	59.9304	200								34.893	56.3979	25.2546	14.7967		0.0402301	0.0869011	0.0239526	0.0101612		0.0464388	0.14265	0.0214952	0.0161949
2015-07-14	11:45:55	00:00:05	55.1667	0.919444	26.12	26.1266	40.62	44.7937	61.7676	50.9521	58.1848	200								38.5368	47.7676	43.0341	13.0511		0.0471784	0.0665778	0.0563164	0.00830802		0.0465308	0.142518	0.0216023	0.0162295
2015-07-14	11:46:00	00:00:05	55.25	0.920833	26.12	26.1266	40.51	40.8081	57.6782	43.7134	62.2009	200								34.5512	43.6782	35.7954	17.0672		0.0395999	0.0576745	0.041912	0.0127758		0.0465571	0.142261	0.0215763	0.0162828
2015-07-14	11:46:05	00:00:05	55.3333	0.922222	26.12	26.1265	40.53	41.4978	66.7847	41.0889	59.9304	200								35.2409	52.7847	33.1709	14.7967		0.0408754	0.0781452	0.0370932	0.0101612		0.046582	0.142106	0.0215562	0.0163251
2015-07-14	11:46:10	00:00:05	55.4167	0.923611	26.12	26.1265	40.37	36.3647	61.2366	41.4551	49.7253	200								30.1078	47.2366	33.5371	4.59161		0.0317541	0.0653946	0.0377522	0.00155522		0.046584	0.142004	0.0215767	0.0163316
2015-07-14	11:46:15	00:00:05	55.5	0.925	26.12	26.1265	40.38	36.6638	60.7117	41.8213	57.5439	200								30.4069	46.7117	33.9033	12.4102		0.0322616	0.064233	0.0384156	0.00766339		0.046584	0.141876	0.0216315	0.0163635
2015-07-14	11:46:20	00:00:05	55.5833	0.926389	26.12	26.1264	40.33	35.2112	54.3701	36.4075	65.7837	200								28.9543	40.3701	28.4895	20.65		0.0298254	0.0508299	0.0290612	0.0173433		0.0465325	0.141535	0.0216033	0.0164358
2015-07-14	11:46:25	00:00:05	55.6667	0.927778	26.12	26.1264	40.38	36.6638	60.1929	40.3809	53.6682	200								30.4069	46.1929	32.4629	8.53451		0.0322616	0.0630925	0.0358315	0.00420349		0.0464911	0.141236	0.021611	0.0164533
2015-07-14	11:46:30	00:00:05	55.75	0.929167	26.12	26.1263	40.21	32.0099	61.7676	38.6597	53.6682	200								25.753	47.7676	30.7417	8.53451		0.0247153	0.0665778	0.0328333	0.00420349		0.0464097	0.141008	0.0216036	0.0164708
2015-07-14	11:46:35	00:00:05	55.8333	0.930556	26.12	26.1263	40.3	34.375	64.4958	53.8452	57.5439	200								28.1181	50.4958	45.9272	12.4102		0.0284559	0.0727815	0.0625114	0.00766339		0.0463438	0.140768	0.0215372	0.0165028
2015-07-14	11:46:40	00:00:05	55.9167	0.931944	26.12	26.1263	40.25	33.0322	49.2188	42.9443	57.1228	200								26.7753	35.2188	35.0263	11.9891		0.0263078	0.0408344	0.0404769	0.00725059		0.0462473	0.140366	0.0215052	0.016533
2015-07-14	11:46:45	00:00:05	56	0.933333	26.12	26.1262	40.25	33.0322	56.7139	53.8452	53.2776	200								26.7753	42.7139	45.9272	8.14391		0.0263078	0.0556458	0.0625114	0.0038992		0.0461539	0.140074	0.0215052	0.0165492
2015-07-14	11:46:50	00:00:05	56.0833	0.934722	26.12	26.1262	40.23	32.5195	69.165	60.8276	52.89	200								26.2626	55.165	52.9096	7.75631		0.0255045	0.0838741	0.078442	0.00360584		0.0460218	0.139909	0.0215528	0.0165642
2015-07-14	11:46:55	00:00:05	56.1667	0.936111	26.12	26.1261	40.18	31.2683	64.4958	60.8276	60.8276	200								25.0114	50.4958	52.9096	15.6939		0.0235837	0.0727815	0.078442	0.0111674		0.0459235	0.139809	0.0216858	0.0166108
2015-07-14	11:47:00	00:00:05	56.25	0.9375	26.12	26.1261	40.22	32.2632	51.2878	38.3301	57.5439	200								26.0063	37.2878	30.4121	12.4102		0.0251064	0.0447499	0.0322705	0.00766339		0.0458347	0.139524	0.0216089	0.0166426
2015-07-14	11:47:05	00:00:05	56.3333	0.938889	26.13	26.1261	40.14	30.3162	59.6802	40.0269	88.5437	200								24.0593	45.6802	32.1089	43.41		0.0221603	0.0619731	0.0352068	0.0571075		0.0457426	0.139343	0.0215955	0.0168806
2015-07-14	11:47:10	00:00:05	56.4167	0.940278	26.12	26.126	39.95	26.2543	47.2473	50.9521	75.3662	200								19.9974	33.2473	43.0341	30.2325		0.0164725	0.0372303	0.0563164	0.0319654		0.0456514	0.138946	0.0217321	0.0170137
2015-07-14	11:47:15	00:00:05	56.5	0.941667	26.12	26.126	39.87	24.7528	63.9404	41.8213	66.2781	200								18.4959	49.9404	33.9033	21.1444		0.0145341	0.0715017	0.0384156	0.0180141		0.0455595	0.138651	0.021688	0.0170888
2015-07-14	11:47:20	00:00:05	56.5833	0.943056	26.12	26.126	39.81	23.6969	62.8418	50.0305	52.6978	200								17.44	48.8418	42.1125	7.56411		0.0132263	0.0689956	0.0543944	0.00346359		0.0454597	0.138257	0.021743	0.0170686
2015-07-14	11:47:25	00:00:05	56.6667	0.944444	26.12	26.1259	39.96	26.4496	67.9688	53.8452	69.0796	200								20.1927	53.9688	45.9272	23.9459		0.0167313	0.080976	0.0625114	0.0219931		0.0453479	0.137948	0.0218824	0.0171603
2015-07-14	11:47:30	00:00:05	56.75	0.945833	26.12	26.1259	39.86	24.5728	55.2917	45.7031	66.7786	200								18.3159	41.2917	37.7851	21.6449		0.0143079	0.0527039	0.0457111	0.0187029		0.0452345	0.137635	0.0219713	0.0172382
2015-07-14	11:47:35	00:00:05	56.8333	0.947222	26.12	26.1258	40.16	30.7861	70.3979	46.1182	73.6633	200								24.5292	56.3979	38.2002	28.5296		0.0228586	0.0869011	0.0465192	0.0291269		0.0451797	0.137435	0.0220375	0.0173595
2015-07-14	11:47:40	00:00:05	56.9167	0.948611	26.12	26.1258	39.91	25.4883	65.0635	50.0305	65.0482	200								19.2314	51.0635	42.1125	19.9145		0.0154722	0.0740984	0.0543944	0.0163632		0.0451159	0.137191	0.0221225	0.0174144
2015-07-14	11:47:45	00:00:05	57	0.95	26.12	26.1257	39.89	25.116	77.6489	46.9482	68.042	200								18.8591	63.6489	39.0302	22.9083		0.0149946	0.105507	0.0481511	0.0204846		0.0450482	0.137049	0.0221686	0.0174998
2015-07-14	11:47:50	00:00:05	57.0833	0.951389	26.12	26.1257	39.74	22.5372	59.1675	50.9521	63.8428	200								16.2803	45.1675	43.0341	18.7091		0.0118442	0.0608612	0.0563164	0.0148038		0.0449732	0.136645	0.0221287	0.0175615
2015-07-14	11:47:55	00:00:05	57.1667	0.952778	26.12	26.1256	39.62	20.7153	65.625	47.3755	79.4983	200								14.4584	51.625	39.4575	34.3646		0.00979108	0.0754096	0.0489994	0.0392574		0.0448267	0.136345	0.0221102	0.017725
2015-07-14	11:48:00	00:00:05	57.25	0.954167	26.12	26.1255	39.79	23.3582	75.5859	42.1875	85.1929	200								17.1013	61.5859	34.2695	40.0592		0.0128167	0.100075	0.0390833	0.0502035		0.0447738	0.136105	0.0220579	0.0179342
2015-07-14	11:48:05	00:00:05	57.3333	0.955556	26.12	26.1255	39.99	27.0477	69.7876	54.3457	63.3667	200								20.7908	55.7876	46.4277	18.233		0.0175333	0.0853976	0.0636077	0.0142042		0.0447245	0.135888	0.0219845	0.0179934
2015-07-14	11:48:10	00:00:05	57.4167	0.956944	26.12	26.1255	39.64	21.0052	60.7117	58.5693	89.9231	200								14.7483	46.7117	50.6513	44.7894		0.0101079	0.064233	0.0731413	0.0600461		0.0446481	0.135543	0.0220704	0.0182436
2015-07-14	11:48:15	00:00:05	57.5	0.958333	26.12	26.1254	39.87	24.7528	76.2695	55.8838	90.2771	200								18.4959	62.2695	47.9658	45.1434		0.0145341	0.101863	0.0670214	0.0608091		0.044599	0.135274	0.0222264	0.018497
2015-07-14	11:48:20	00:00:05	57.5833	0.959722	26.12	26.1254	39.6	20.4285	85.791	50.0305	76.5198	200								14.1716	71.791	42.1125	31.3861		0.00948143	0.127978	0.0543944	0.0339442		0.0445518	0.135126	0.0223402	0.0186365
2015-07-14	11:48:25	00:00:05	57.6667	0.961111	26.12	26.1253	39.53	19.4702	75.5859	47.3755	87.8601	200								13.2133	61.5859	39.4575	42.7264		0.00847422	0.100075	0.0489994	0.0556719		0.0445093	0.134874	0.0223177	0.0188552
2015-07-14	11:48:30	00:00:05	57.75	0.9625	26.12	26.1253	39.54	19.603	87.3779	57.4768	78.595	200								13.3461	73.3779	49.5588	33.4613		0.00861125	0.132546	0.0706274	0.0376154		0.0444485	0.134756	0.0223228	0.0190119
2015-07-14	11:48:35	00:00:05	57.8333	0.963889	26.12	26.1252	39.57	20.0104	95.8252	59.1187	82.9285	200								13.7535	81.8252	51.2007	37.7948		0.00903676	0.157859	0.074418	0.0457299		0.0444046	0.134832	0.0222295	0.0192025
2015-07-14	11:48:40	00:00:05	57.9167	0.965278	26.12	26.1252	39.44	18.3182	81.9824	57.4768	84.2102	200								12.0613	67.9824	49.5588	39.0765		0.00732072	0.117264	0.0706274	0.0482428		0.0443562	0.134564	0.0222809	0.0194035
2015-07-14	11:48:45	00:00:05	58	0.966667	26.12	26.1251	39.28	16.4795	96.7285	61.9873	77.9968	200								10.2226	82.7285	54.0693	32.8631		0.00561479	0.160664	0.081218	0.0365426		0.0442646	0.134464	0.0224961	0.0195557
2015-07-14	11:48:50	00:00:05	58.0833	0.968056	26.12	26.1251	39.67	21.4508	87.3779	51.8921	108.887	200								15.1939	73.3779	43.9741	63.7533		0.0106022	0.132546	0.0583025	0.105784		0.0441921	0.134299	0.0225897	0.0199965
2015-07-14	11:48:55	00:00:05	58.1667	0.969444	26.12	26.125	39.47	18.692	79.0649	44.0979	175.085	200								12.4351	65.0649	36.1799	129.951		0.00768803	0.109297	0.0426364	0.331515		0.044111	0.134036	0.0226584	0.0213778
2015-07-14	11:49:00	00:00:05	58.25	0.970833	26.12	26.125	39.43	18.1961	88.1836	48.6816	105.933	200								11.9392	74.1836	40.7636	60.7993		0.00720221	0.134888	0.0516269	0.0980331		0.0440501	0.133815	0.0227626	0.0217863
2015-07-14	11:49:05	00:00:05	58.3333	0.972222	26.12	26.125	39.41	17.9535	87.3779	49.5728	130.646	200								11.6966	73.3779	41.6548	85.5123		0.00696891	0.132546	0.0534493	0.169423		0.043936	0.133624	0.0228485	0.0224922
2015-07-14	11:49:10	00:00:05	58.4167	0.973611	26.12	26.1249	39.04	14.1403	81.2378	46.5332	90.979	200								7.88337	67.2378	38.6152	45.8453		0.00370105	0.11521	0.0473325	0.0623328		0.0438591	0.133308	0.0229089	0.0227519
2015-07-14	11:49:15	00:00:05	58.5	0.975	26.12	26.1249	39.3	16.6962	82.7271	46.5332	70.6604	200								10.4393	68.7271	38.6152	25.5267		0.00580692	0.119331	0.0473325	0.0243679		0.0437835	0.133022	0.0229693	0.0228535
2015-07-14	11:49:20	00:00:05	58.5833	0.976389	26.12	26.1248	39.1	14.682	92.3462	59.6802	75.3662	200								8.42507	78.3462	51.7622	30.2325		0.00411736	0.147233	0.0757314	0.0319654		0.0437008	0.132795	0.0231885	0.0229867
2015-07-14	11:49:25	00:00:05	58.6667	0.977778	26.12	26.1247	39.07	14.4089	86.5845	46.9482	90.2771	200								8.15197	72.5845	39.0302	45.1434		0.00390539	0.130255	0.0481511	0.0608091		0.043604	0.132527	0.0232858	0.0232262
2015-07-14	11:49:30	00:00:05	58.75	0.979167	26.12	26.1247	39.18	15.448	98.5352	39.6851	131.689	200								9.19107	84.5352	31.7671	86.5553		0.00473411	0.166329	0.0346076	0.17275		0.0435158	0.132305	0.0233024	0.023946
2015-07-14	11:49:35	00:00:05	58.8333	0.980556	26.12	26.1246	39.12	14.8697	94.9463	44.0979	83.5693	200								8.61277	80.9463	36.1799	38.4356		0.00426548	0.155148	0.0426364	0.0469799		0.043415	0.132316	0.0233568	0.0241284
2015-07-14	11:49:40	00:00:05	58.9167	0.981944	26.12	26.1246	39.09	14.5905	95.8252	45.2942	108.038	200								8.33357	81.8252	37.3762	62.9043		0.00404587	0.157859	0.0449202	0.103534		0.0433256	0.132177	0.0234023	0.0245598
2015-07-14	11:49:45	00:00:05	59	0.983333	26.12	26.1245	39.23	15.9531	102.295	43.3228	143.787	200								9.69617	88.295	35.4048	98.6533		0.00515829	0.178353	0.0411808	0.213086		0.0432266	0.132051	0.0234052	0.0254149
2015-07-14	11:49:50	00:00:05	59.0833	0.984722	26.12	26.1245	39.03	14.0518	92.3462	44.4946	130.646	200								7.79487	78.3462	36.5766	85.5123		0.00363463	0.147233	0.0433888	0.169423		0.0431269	0.131921	0.0234732	0.0261155
2015-07-14	11:49:55	00:00:05	59.1667	0.986111	26.12	26.1245	38.77	11.9934	83.4839	49.5728	88.2019	200								5.73647	69.4839	41.6548	43.0682		0.00222262	0.121446	0.0534493	0.056388		0.0429837	0.131558	0.0235726	0.0263504
2015-07-14	11:50:00	00:00:05	59.25	0.9875	26.12	26.1244	39.29	16.5863	101.343	59.1187	101.465	200								10.3294	87.343	51.2007	56.3313		0.00570918	0.175279	0.074418	0.0867365		0.0428688	0.131519	0.0236713	0.026711
2015-07-14	11:50:05	00:00:05	59.3333	0.988889	26.12	26.1244	39.08	14.4989	97.6318	54.3457	124.06	200								8.24197	83.6318	46.4277	78.9263		0.00397478	0.163487	0.0636077	0.148985		0.0427686	0.131469	0.0237391	0.0273317
2015-07-14	11:50:10	00:00:05	59.4167	0.990278	26.12	26.1243	39.2	15.6479	109.277	48.6816	91.333	200								9.39097	95.277	40.7636	46.1993		0.00490035	0.20151	0.0516269	0.0631066		0.0426341	0.131361	0.0237353	0.0275947
2015-07-14	11:50:15	00:00:05	59.5	0.991667	26.12	26.1243	39.3	16.6962	105.225	41.4551	101.465	200								10.4393	91.225	33.5371	56.3313		0.00580692	0.187941	0.0377522	0.0867365		0.0425301	0.131361	0.0237737	0.0279559
2015-07-14	11:50:20	00:00:05	59.5833	0.993056	26.12	26.1242	39.26	16.2659	103.271	48.2422	87.1826	200								10.009	89.271	40.3242	42.0489		0.0054278	0.181526	0.0507372	0.0542628		0.0424183	0.131387	0.0237737	0.028182
2015-07-14	11:50:25	00:00:05	59.6667	0.994444	26.12	26.1242	39.62	20.7153	91.4917	44.4946	137.048	200								14.4584	77.4917	36.5766	91.9143		0.00979108	0.144665	0.0433888	0.190224		0.0423289	0.131058	0.0238334	0.0289746
2015-07-14	11:50:30	00:00:05	59.75	0.995833	26.11	26.1241	38.98	13.623	102.295	50.0305	92.041	200								7.36607	88.295	42.1125	46.9073		0.00331929	0.178353	0.0543944	0.064665		0.0422062	0.13082	0.0239389	0.029244
2015-07-14	11:50:35	00:00:05	59.8333	0.997222	26.11	26.124	39.12	14.8697	101.343	44.4946	120.19	200								8.61277	87.343	36.5766	75.0563		0.00426548	0.175279	0.0433888	0.137442		0.0420785	0.130602	0.0239704	0.0298153
2015-07-14	11:50:40	00:00:05	59.9167	0.998611	26.12	26.124	38.61	10.9169	105.225	48.6816	150.867	200								4.65997	91.225	40.7636	105.733		0.00159252	0.187941	0.0516269	0.238141		0.0419374	0.130218	0.0240942	0.0308075
2015-07-14	11:50:45	00:00:05	60	1	26.12	26.124	38.81	12.2833	99.4629	52.8564	98.3398	200								6.02637	85.4629	44.9384	53.2061		0.00240552	0.169266	0.0603668	0.0791483		0.0418151	0.129975	0.0242225	0.0311373
2015-07-14	11:50:50	00:00:05	60.0833	1.00139	26.12	26.1239	39.02	13.9648	98.5352	44.0979	92.4011	200								7.70787	84.5352	36.1799	47.2674		0.00356978	0.166329	0.0426364	0.0654631		0.0416751	0.129669	0.0242373	0.0314101
2015-07-14	11:50:55	00:00:05	60.1667	1.00278	26.12	26.1239	39.15	15.155	94.9463	50.0305	147.876	200								8.89807	80.9463	42.1125	102.742		0.00449438	0.155148	0.0543944	0.227429		0.0415004	0.129334	0.0243295	0.0323577
2015-07-14	11:51:00	00:00:05	60.25	1.00417	26.12	26.1238	38.89	12.8922	104.248	56.9458	112.817	200								6.63527	90.248	49.0278	67.6833		0.00280712	0.184723	0.0694175	0.116437		0.0413597	0.129014	0.0245436	0.0328428
2015-07-14	11:51:05	00:00:05	60.3333	1.00556	26.12	26.1238	38.9	12.9715	107.227	52.8564	95.3186	200								6.71457	93.227	44.9384	50.1849		0.00286112	0.194601	0.0603668	0.072064		0.0412167	0.128791	0.0247004	0.0331431
2015-07-14	11:51:10	00:00:05	60.4167	1.00694	26.12	26.1237	39.39	17.7155	106.226	49.1272	129.614	200								11.4586	92.226	41.2092	84.4803		0.00674287	0.19126	0.0525351	0.166156		0.0410947	0.128656	0.0248327	0.0338354
2015-07-14	11:51:15	00:00:05	60.5	1.00833	26.12	26.1237	39.47	18.692	108.252	45.7031	134.338	200								12.4351	94.252	37.7851	89.2043		0.00768803	0.198044	0.0457111	0.181308		0.0409364	0.128392	0.024836	0.0345909
2015-07-14	11:51:20	00:00:05	60.5833	1.00972	26.12	26.1237	39.23	15.9531	96.7285	40.7349	124.561	200								9.69617	82.7285	32.8169	79.4273		0.00515829	0.160664	0.0364603	0.150505		0.040798	0.127853	0.0248558	0.0352115
2015-07-14	11:51:25	00:00:05	60.6667	1.01111	26.12	26.1236	39.3	16.6962	110.303	49.1272	152.087	200								10.4393	96.303	41.2092	106.953		0.00580692	0.205002	0.0525351	0.242564		0.0406192	0.127477	0.0249598	0.0362219
2015-07-14	11:51:30	00:00:05	60.75	1.0125	26.12	26.1236	39.35	17.2531	109.277	56.9458	116.443	200								10.9962	95.277	49.0278	71.3093		0.00631176	0.20151	0.0694175	0.126604		0.0404521	0.127265	0.0251401	0.0367494
2015-07-14	11:51:35	00:00:05	60.8333	1.01389	26.12	26.1235	39.24	16.0568	105.225	45.2942	111.493	200								9.79987	91.225	37.3762	66.3593		0.00524707	0.187941	0.0449202	0.112805		0.0402953	0.127032	0.0251644	0.0372194
2015-07-14	11:51:40	00:00:05	60.9167	1.01528	26.12	26.1235	39.55	19.7388	99.4629	45.2942	124.06	200								13.4819	85.4629	37.3762	78.9263		0.00875223	0.169266	0.0449202	0.148985		0.0401503	0.126721	0.0251943	0.0378402
2015-07-14	11:51:45	00:00:05	61	1.01667	26.12	26.1235	39.47	18.692	116.772	43.7134	150.867	200								12.4351	102.772	35.7954	105.733		0.00768803	0.227534	0.041912	0.238141		0.0400009	0.126541	0.0252272	0.0388325
2015-07-14	11:51:50	00:00:05	61.0833	1.01806	26.12	26.1234	39.31	16.806	113.501	42.9443	139.819	200								10.5491	99.501	35.0263	94.6853		0.0059052	0.21603	0.0404769	0.199506		0.039832	0.126477	0.0252301	0.0396592
2015-07-14	11:51:55	00:00:05	61.1667	1.01944	26.12	26.1234	39.18	15.448	111.353	39.0015	104.694	200								9.19107	97.353	31.0835	59.5603		0.00473411	0.208599	0.0334208	0.0948484		0.0396614	0.126137	0.0252326	0.0400514
2015-07-14	11:52:00	00:00:05	61.25	1.02083	26.12	26.1233	39.27	16.3727	103.271	30.5359	102.258	200								10.1158	89.271	22.6179	57.1243		0.005521	0.181526	0.0200697	0.0887034		0.0394041	0.125785	0.0252072	0.0404208
2015-07-14	11:52:05	00:00:05	61.3333	1.02222	26.12	26.1233	39.3	16.6962	100.403	33.1726	156.421	200								10.4393	86.403	25.2546	111.287		0.00580692	0.172263	0.0239526	0.258522		0.0391613	0.125375	0.0252408	0.041498
2015-07-14	11:52:10	00:00:05	61.4167	1.02361	26.12	26.1232	39.64	21.0052	112.427	32.0862	158.96	200								14.7483	98.427	24.1682	113.826		0.0101079	0.212302	0.0223215	0.268048		0.0389612	0.124965	0.0251945	0.0426106
2015-07-14	11:52:15	00:00:05	61.5	1.025	26.12	26.1232	39.42	18.0756	105.225	37.0361	133.813	200								11.8187	91.225	29.1181	88.6793		0.00708597	0.187941	0.0300966	0.1796		0.0387194	0.124475	0.0251831	0.0433589
2015-07-14	11:52:20	00:00:05	61.5833	1.02639	26.12	26.1232	39.48	18.8187	114.575	32.6233	142.065	200								12.5618	100.575	24.7053	96.9313		0.00781406	0.219783	0.0231225	0.207151		0.0384161	0.124339	0.0251814	0.0442221
2015-07-14	11:52:25	00:00:05	61.6667	1.02778	26.12	26.1231	39.55	19.7388	105.225	36.7188	200	200								13.4819	91.225	28.8008	154.866		0.00875223	0.187941	0.0295722	0.439228		0.0381329	0.124106	0.0252083	0.0460522
2015-07-14	11:52:30	00:00:05	61.75	1.02917	26.12	26.1231	39.46	18.5669	105.225	34.021	137.048	200								12.31	91.225	26.103	91.9143		0.00756435	0.187941	0.0252564	0.190224		0.0378747	0.123819	0.0252384	0.0468383
2015-07-14	11:52:35	00:00:05	61.8333	1.03056	26.12	26.123	39.94	26.059	116.772	41.4551	143.213	200								19.8021	102.772	33.5371	98.0793		0.0162152	0.227534	0.0377522	0.211101		0.0376573	0.123619	0.0252612	0.0477114
2015-07-14	11:52:40	00:00:05	61.9167	1.03194	26.12	26.123	39.41	17.9535	109.277	43.7134	189.807	200								11.6966	95.277	35.7954	144.673		0.00696891	0.20151	0.041912	0.393788		0.037356	0.123071	0.0252454	0.0493522
2015-07-14	11:52:45	00:00:05	62	1.03333	26.12	26.123	39.47	18.692	106.226	51.8921	121.143	200								12.4351	92.226	43.9741	76.0093		0.00768803	0.19126	0.0583025	0.140252		0.0370684	0.12248	0.0253441	0.0499366
2015-07-14	11:52:50	00:00:05	62.0833	1.03472	26.12	26.1229	39.71	22.0642	109.277	50.0305	113.269	200								15.8073	95.277	42.1125	68.1353		0.0112971	0.20151	0.0543944	0.117687		0.0367959	0.122338	0.0254291	0.0504269
2015-07-14	11:52:55	00:00:05	62.1667	1.03611	26.12	26.1229	39.62	20.7153	110.303	40.7349	134.338	200								14.4584	96.303	32.8169	89.2043		0.00979108	0.205002	0.0364603	0.181308		0.0364333	0.121875	0.0254758	0.0511824
2015-07-14	11:53:00	00:00:05	62.25	1.0375	26.12	26.1228	39.58	20.1477	101.343	44.8914	135.962	200								13.8908	87.343	36.9734	90.8283		0.00918189	0.175279	0.0441463	0.186632		0.0360815	0.121534	0.0255181	0.05196
2015-07-14	11:53:05	00:00:05	62.3333	1.03889	26.12	26.1228	39.8	23.526	110.303	38.0005	128.076	200								17.2691	96.303	30.0825	82.9423		0.013019	0.205002	0.0317114	0.16133		0.0356821	0.121318	0.025579	0.0526315
2015-07-14	11:53:10	00:00:05	62.4167	1.04028	26.12	26.1227	39.93	25.8667	110.303	41.0889	104.285	200								19.6098	96.303	33.1709	59.1513		0.0159634	0.205002	0.0370932	0.0938059		0.0353099	0.121005	0.0256167	0.0530224
2015-07-14	11:53:15	00:00:05	62.5	1.04167	26.12	26.1227	39.88	24.9329	111.353	38.3301	113.269	200								18.676	97.353	30.4121	68.1353		0.0147617	0.208599	0.0322705	0.117687		0.034894	0.120601	0.0256321	0.0535128
2015-07-14	11:53:20	00:00:05	62.5833	1.04306	26.12	26.1227	39.8	23.526	108.252	39.0015	96.814	200								17.2691	94.252	31.0835	51.6803		0.013019	0.198044	0.0334208	0.0755393		0.0344284	0.120132	0.0257407	0.0538271
2015-07-14	11:53:25	00:00:05	62.6667	1.04444	26.12	26.1226	39.46	18.5669	105.225	48.6816	69.0796	200								12.31	91.225	40.7636	23.9459		0.00756435	0.187941	0.0516269	0.0219931		0.0340138	0.119574	0.0258091	0.0539187
2015-07-14	11:53:30	00:00:05	62.75	1.04583	26.12	26.1226	39.47	18.692	112.427	45.2942	90.625	200								12.4351	98.427	37.3762	45.4913		0.00768803	0.212302	0.0449202	0.0615625		0.0335843	0.119407	0.0259521	0.0541752
2015-07-14	11:53:35	00:00:05	62.8333	1.04722	26.12	26.1225	38.98	13.623	111.353	51.4221	72.0093	200								7.36607	97.353	43.5041	26.8756		0.00331929	0.208599	0.0573062	0.0264661		0.0331741	0.119108	0.0261642	0.0542855
2015-07-14	11:53:40	00:00:05	62.9167	1.04861	26.12	26.1225	38.5	10.2478	108.252	43.3228	59.2712	200								3.99087	94.252	35.4048	14.1375		0.00124197	0.198044	0.0411808	0.0094449		0.0327622	0.118786	0.0262855	0.0543249
2015-07-14	11:53:45	00:00:05	63	1.05	26.12	26.1225	38.72	11.6432	115.674	45.2942	46.7743	200								5.38627	101.674	37.3762	1.64061		0.00200903	0.223647	0.0449202	0.000298447		0.0323673	0.118509	0.0264121	0.054324
2015-07-14	11:53:50	00:00:05	63.0833	1.05139	26.12	26.1224	38.96	13.4567	111.353	33.7341	53.2776	200								7.19977	97.353	25.8161	8.14391		0.00319991	0.208599	0.0248126	0.0038992		0.0320217	0.118231	0.0264443	0.0543402
2015-07-14	11:53:55	00:00:05	63.1667	1.05278	26.12	26.1224	38.82	12.3581	109.277	35.4858	56.0791	200								6.10117	95.277	27.5678	10.9454		0.00245359	0.20151	0.0275679	0.00626509		0.031679	0.117841	0.0265205	0.0543344
2015-07-14	11:54:00	00:00:05	63.25	1.05417	26.12	26.1223	39.1	14.682	110.303	35.791	53.2776	200								8.42507	96.303	27.873	8.14391		0.00411736	0.205002	0.0280591	0.0038992		0.0313546	0.117528	0.0265769	0.0543506
2015-07-14	11:54:05	00:00:05	63.3333	1.05556	26.12	26.1223	39.26	16.2659	117.896	51.4221	48.1384	200								10.009	103.896	43.5041	3.00471		0.0054278	0.231539	0.0573062	0.000787761		0.0310469	0.117241	0.0267552	0.0543453
2015-07-14	11:54:10	00:00:05	63.4167	1.05694	26.12	26.1222	39.48	18.8187	103.271	42.1875	43.5547	200								12.5618	89.271	34.2695	-1.57899		0.00781406	0.181526	0.0390833	0		0.0307598	0.116927	0.0268972	0.0543444
2015-07-14	11:54:15	00:00:05	63.5	1.05833	26.12	26.1222	39.6	20.4285	115.674	46.1182	49.7253	200								14.1716	101.674	38.2002	4.59161		0.00948143	0.223647	0.0465192	0.00155522		0.0304463	0.116651	0.027066	0.0543509
2015-07-14	11:54:20	00:00:05	63.5833	1.05972	26.12	26.1222	39.47	18.692	110.303	54.8584	51.001	200								12.4351	96.303	46.9404	5.86731		0.00768803	0.205002	0.0647382	0.00230449		0.0301369	0.116453	0.0272632	0.0543605
2015-07-14	11:54:25	00:00:05	63.6667	1.06111	26.12	26.1221	39.81	23.6969	114.575	48.6816	41.4551	200								17.44	100.575	40.7636	-3.67859		0.0132263	0.219783	0.0516269	0		0.0298671	0.116334	0.027375	0.0543603
2015-07-14	11:54:30	00:00:05	63.75	1.0625	26.11	26.122	39.8	23.526	96.7285	52.8564	40.0238	200								17.2691	82.7285	44.9384	-5.10989		0.013019	0.160664	0.0603668	0		0.0295855	0.115933	0.0276004	0.0543603
2015-07-14	11:54:35	00:00:05	63.8333	1.06389	26.12	26.122	39.84	24.2188	111.353	42.9443	43.7103	200								17.9619	97.353	35.0263	-1.42339		0.0138669	0.208599	0.0404769	0		0.0292844	0.115713	0.0276458	0.0543603
2015-07-14	11:54:40	00:00:05	63.9167	1.06528	26.12	26.122	39.66	21.3013	116.772	44.4946	42.1906	200								15.0444	102.772	36.5766	-2.94309		0.0104354	0.227534	0.0433888	0		0.0289507	0.115729	0.0277554	0.0543603
2015-07-14	11:54:45	00:00:05	64	1.06667	26.12	26.1219	39.84	24.2188	113.501	39.3372	52.89	200								17.9619	99.501	31.4192	7.75631		0.0138669	0.21603	0.0340017	0.00360584		0.0286726	0.116037	0.0277504	0.0543752
2015-07-14	11:54:50	00:00:05	64.0833	1.06806	26.12	26.1219	39.79	23.3582	113.501	36.4075	36.5662	200								17.1013	99.501	28.4895	-8.56749		0.0128167	0.21603	0.0290612	0		0.0284116	0.116474	0.027804	0.0543752
2015-07-14	11:54:55	00:00:05	64.1667	1.06944	26.12	26.1219	39.85	24.3927	105.225	45.7031	33.1085	200								18.1358	91.225	37.7851	-12.0252		0.0140829	0.187941	0.0457111	0		0.028171	0.116695	0.0279207	0.054367
2015-07-14	11:55:00	00:00:05	64.25	1.07083	26.12	26.1219	39.53	19.4702	121.313	44.4946	40.5884	200								13.2133	107.313	36.5766	-4.54529		0.00847422	0.243874	0.0433888	0		0.027897	0.117098	0.0280677	0.054367
2015-07-14	11:55:05	00:00:05	64.3333	1.07222	26.12	26.1219	39.51	19.2047	109.277	31.5552	29.8279	200								12.9478	95.277	23.6372	-15.3058		0.00820276	0.20151	0.0215401	0		0.0276508	0.117334	0.0281395	0.0543646
2015-07-14	11:55:10	00:00:05	64.4167	1.07361	26.12	26.1218	39.92	25.6775	112.427	35.4858	44.0216	200								19.4206	98.427	27.5678	-1.11209		0.0157171	0.212302	0.0275679	0		0.027462	0.117747	0.0282068	0.0543646
2015-07-14	11:55:15	00:00:05	64.5	1.075	26.12	26.1218	39.81	23.6969	119.019	42.1875	36.6913	200								17.44	105.019	34.2695	-8.44239		0.0132263	0.235566	0.0390833	0		0.0272368	0.118257	0.0283324	0.0543581
2015-07-14	11:55:20	00:00:05	64.5833	1.07639	26.12	26.1217	39.86	24.5728	121.313	40.0269	32.663	200								18.3159	107.313	32.1089	-12.4707		0.0143079	0.243874	0.0352068	0		0.0270251	0.118616	0.0284332	0.0543581
2015-07-14	11:55:25	00:00:05	64.6667	1.07778	26.12	26.1217	39.69	21.7529	126.074	34.3079	43.866	200								15.496	112.074	26.3899	-1.26769		0.0109423	0.26146	0.0257031	0		0.0268436	0.119	0.0284596	0.0543581
2015-07-14	11:55:30	00:00:05	64.75	1.07917	26.12	26.1217	39.87	24.7528	120.166	46.5332	47.2809	200								18.4959	106.166	38.6152	2.14721		0.0145341	0.239707	0.0473325	0.000459543		0.0266771	0.119456	0.0285622	0.05436
2015-07-14	11:55:35	00:00:05	64.8333	1.08056	26.12	26.1216	39.84	24.2188	114.575	44.8914	40.5884	200								17.9619	100.575	36.9734	-4.54529		0.0138669	0.219783	0.0441463	0		0.0265114	0.119758	0.0286749	0.05436
2015-07-14	11:55:40	00:00:05	64.9167	1.08194	26.12	26.1216	39.76	22.8607	116.772	41.4551	41.5985	200								16.6038	102.772	33.5371	-3.53519		0.0122239	0.227534	0.0377522	0		0.0263201	0.120209	0.0287837	0.05436
2015-07-14	11:55:45	00:00:05	65	1.08333	26.12	26.1215	39.96	26.4496	117.896	42.1875	27.0996	200								20.1927	103.896	34.2695	-18.0341		0.0167313	0.231539	0.0390833	0		0.0261476	0.12043	0.0288913	0.0543384
2015-07-14	11:55:50	00:00:05	65.0833	1.08472	26.12	26.1215	39.88	24.9329	111.353	42.9443	26.8341	200								18.676	97.353	35.0263	-18.2996		0.0147617	0.208599	0.0404769	0		0.025982	0.120766	0.0289793	0.054302
2015-07-14	11:55:55	00:00:05	65.1667	1.08611	26.12	26.1215	39.79	23.3582	121.313	36.7188	33.9081	200								17.1013	107.313	28.8008	-11.2256		0.0128167	0.243874	0.0295722	0		0.0258156	0.120957	0.0289749	0.0542297
2015-07-14	11:56:00	00:00:05	65.25	1.0875	26.12	26.1214	39.87	24.7528	121.313	39.6851	36.8195	200								18.4959	107.313	31.7671	-8.31419		0.0145341	0.243874	0.0346076	0		0.0256665	0.121119	0.0290866	0.0542297
2015-07-14	11:56:05	00:00:05	65.3333	1.08889	26.12	26.1214	39.8	23.526	122.485	41.4551	37.0728	200								17.2691	108.485	33.5371	-8.06089		0.013019	0.24816	0.0377522	0		0.0254862	0.121423	0.0292052	0.0541884
2015-07-14	11:56:10	00:00:05	65.4167	1.09028	26.12	26.1213	39.86	24.5728	129.761	46.1182	43.7103	200								18.3159	115.761	38.2002	-1.42339		0.0143079	0.275393	0.0465192	0		0.0253075	0.121801	0.0293938	0.0541573
2015-07-14	11:56:15	00:00:05	65.5	1.09167	26.12	26.1213	39.94	26.059	127.271	56.9458	40.5884	200								19.8021	113.271	49.0278	-4.54529		0.0162152	0.265954	0.0694175	0		0.0251443	0.122055	0.0296585	0.0541263
2015-07-14	11:56:20	00:00:05	65.5833	1.09306	26.12	26.1212	40.06	28.5126	123.657	51.4221	41.0187	200								22.2557	109.657	43.5041	-4.11499		0.0195566	0.252475	0.0573062	0		0.0250128	0.122376	0.0298857	0.0540879
2015-07-14	11:56:25	00:00:05	65.6667	1.09444	26.12	26.1212	40.11	29.6204	110.303	38.3301	43.866	200								23.3635	96.303	30.4121	-1.26769		0.0211414	0.205002	0.0322705	0		0.0248845	0.122549	0.0300034	0.0539864
2015-07-14	11:56:30	00:00:05	65.75	1.09583	26.12	26.1212	40.04	28.0823	117.896	39.6851	46.7743	200								21.8254	103.896	31.7671	1.64061		0.0189537	0.231539	0.0346076	0.000298447		0.0247638	0.122942	0.0300837	0.0538309
2015-07-14	11:56:35	00:00:05	65.8333	1.09722	26.12	26.1211	40.11	29.6204	126.074	48.6816	30.5344	200								23.3635	112.074	40.7636	-14.5993		0.0211414	0.26146	0.0516269	0		0.024676	0.123301	0.0302762	0.0537206
2015-07-14	11:56:40	00:00:05	65.9167	1.09861	26.12	26.1211	40.23	32.5195	121.313	32.0862	51.3733	200								26.2626	107.313	24.1682	6.23961		0.0255045	0.243874	0.0223215	0.0025435		0.0246008	0.123548	0.030357	0.0535458
2015-07-14	11:56:45	00:00:05	66	1.1	26.11	26.121	40.21	32.0099	119.019	35.4858	45.9442	200								25.753	105.019	27.5678	0.810509		0.0247153	0.235566	0.0275679	9.63046e-05		0.0245388	0.123746	0.0304493	0.0534412
2015-07-14	11:56:50	00:00:05	66.0833	1.10139	26.11	26.1209	40.11	29.6204	111.353	47.8088	47.11	200								23.3635	97.353	39.8908	1.97631		0.0211414	0.208599	0.0498654	0.0004023		0.0244645	0.123934	0.0306375	0.0533575
2015-07-14	11:56:55	00:00:05	66.1667	1.10278	26.11	26.1208	39.97	26.6479	128.516	31.0425	40.7318	200								20.391	114.516	23.1245	-4.40189		0.0169956	0.270658	0.0207956	0		0.0243853	0.12448	0.030702	0.0532472
2015-07-14	11:57:00	00:00:05	66.25	1.10417	26.11	26.1207	40.05	28.2959	123.657	40.3809	35.6934	200								22.039	109.657	32.4629	-9.44029		0.0192521	0.252475	0.0358315	0		0.0243289	0.124885	0.0308346	0.0531037
2015-07-14	11:57:05	00:00:05	66.3333	1.10556	26.11	26.1207	40.23	32.5195	132.275	28.6072	32.0068	200								26.2626	118.275	20.6892	-13.1269		0.0255045	0.285049	0.0173961	0		0.0242803	0.125593	0.030883	0.0527341
2015-07-14	11:57:10	00:00:05	66.4167	1.10694	26.12	26.1207	40.18	31.2683	126.074	25.5798	46.4417	200								25.0114	112.074	17.6618	1.30801		0.0235837	0.26146	0.0134972	0.000207512		0.024242	0.126158	0.0309156	0.0524655
2015-07-14	11:57:15	00:00:05	66.5	1.10833	26.12	26.1207	40.22	32.2632	138.818	41.0889	40.5884	200								26.0063	124.818	33.1709	-4.54529		0.0251064	0.310762	0.0370932	0		0.0242204	0.127014	0.031048	0.0520054
2015-07-14	11:57:20	00:00:05	66.5833	1.10972	26.12	26.1207	40.27	33.5632	129.761	47.3755	37.0728	200								27.3063	115.761	39.4575	-8.06089		0.0271496	0.275393	0.0489994	0		0.0241927	0.127558	0.0311848	0.0511502
2015-07-14	11:57:25	00:00:05	66.6667	1.11111	26.11	26.1207	40.23	32.5195	120.166	39.3372	46.2738	200								26.2626	106.166	31.4192	1.14011		0.0255045	0.239707	0.0340017	0.000166472		0.0241465	0.127933	0.0312032	0.0507005
2015-07-14	11:57:30	00:00:05	66.75	1.1125	26.11	26.1206	40.32	34.9274	142.92	50.9521	41.3086	200								28.6705	128.92	43.0341	-3.82509		0.0293579	0.327305	0.0563164	0		0.0241521	0.128661	0.0314286	0.0504534
2015-07-14	11:57:35	00:00:05	66.8333	1.11389	26.11	26.1206	40.34	35.4919	126.074	42.9443	43.0939	200								29.235	112.074	35.0263	-2.03979		0.0302905	0.26146	0.0404769	0		0.0241417	0.129104	0.0315737	0.0502524
2015-07-14	11:57:40	00:00:05	66.9167	1.11528	26.12	26.1206	40.43	38.1897	136.182	33.7341	35.9406	200								31.9328	122.182	25.8161	-9.19309		0.0348975	0.300302	0.0248126	0		0.0241667	0.129625	0.0315857	0.0501089
2015-07-14	11:57:45	00:00:05	67	1.11667	26.12	26.1206	40.4	37.262	132.275	32.0862	52.6978	200								31.0051	118.275	24.1682	7.56411		0.0332857	0.285049	0.0223215	0.00346359		0.0241792	0.130083	0.0316669	0.0494445
2015-07-14	11:57:50	00:00:05	67.0833	1.11806	26.12	26.1206	40.39	36.9629	144.336	39.3372	24.9802	200								30.706	130.336	31.4192	-20.1535		0.0327721	0.333091	0.0340017	0		0.0242044	0.130801	0.031776	0.0491848
2015-07-14	11:57:55	00:00:05	67.1667	1.11944	26.12	26.1205	40.4	37.262	131.006	37.3535	35.817	200								31.0051	117.006	29.4355	-9.31669		0.0332857	0.280159	0.0306245	0		0.0242368	0.131199	0.0318942	0.0486681
2015-07-14	11:58:00	00:00:05	67.25	1.12083	26.12	26.1205	40.65	45.9595	134.863	23.114	45.9442	200								39.7026	120.863	15.196	0.810509		0.0494885	0.295119	0.0106046	9.63046e-05		0.0243416	0.131672	0.0319152	0.0482464
2015-07-14	11:58:05	00:00:05	67.3333	1.12222	26.12	26.1205	40.64	45.5688	142.92	24.0265	31.366	200								39.3119	128.92	16.1085	-13.7677		0.0487097	0.327305	0.0116444	0		0.0244463	0.132239	0.0319638	0.0478103
2015-07-14	11:58:10	00:00:05	67.4167	1.12361	26.12	26.1204	40.74	49.7131	150.049	32.3547	34.491	200								43.4562	136.049	24.4367	-10.6427		0.057205	0.356818	0.0227206	0		0.024568	0.132956	0.0320389	0.0476249
2015-07-14	11:58:15	00:00:05	67.5	1.125	26.12	26.1204	40.8	52.4292	142.92	39.0015	31.0516	200								46.1723	128.92	31.0835	-14.0821		0.0630473	0.327305	0.0334208	0		0.0247175	0.133537	0.0321582	0.0469258
2015-07-14	11:58:20	00:00:05	67.5833	1.12639	26.12	26.1203	40.74	49.7131	132.275	40.7349	51.7487	200								43.4562	118.275	32.8169	6.61501		0.057205	0.285049	0.0364603	0.00279338		0.0248621	0.134172	0.0322485	0.0464624
2015-07-14	11:58:25	00:00:05	67.6667	1.12778	26.12	26.1203	40.72	48.8464	134.863	43.3228	43.2495	200								42.5895	120.863	35.4048	-1.88419		0.055386	0.295119	0.0411808	0		0.0249667	0.134799	0.0323961	0.0463251
2015-07-14	11:58:30	00:00:05	67.75	1.12917	26.12	26.1202	40.75	50.1526	138.818	32.8979	49.9054	200								43.8957	124.818	24.9799	4.77171		0.0581358	0.310762	0.0235361	0.00165422		0.0251059	0.135542	0.0324491	0.0462048
2015-07-14	11:58:35	00:00:05	67.8333	1.13056	26.12	26.1202	40.74	49.7131	147.168	33.7341	42.4896	200								43.4562	133.168	25.8161	-2.64409		0.057205	0.344776	0.0248126	0		0.0252429	0.136531	0.0325483	0.0454989
2015-07-14	11:58:40	00:00:05	67.9167	1.13194	26.12	26.1202	40.7	47.998	142.92	49.5728	32.4432	200								41.7411	128.92	41.6548	-12.6905		0.053627	0.327305	0.0534493	0		0.0253711	0.137164	0.0327567	0.0452639
2015-07-14	11:58:45	00:00:05	68	1.13333	26.12	26.1201	40.81	52.8931	150.049	39.0015	35.0861	200								46.6362	136.049	31.0835	-10.0476		0.0640665	0.356818	0.0334208	0		0.0255413	0.138118	0.0328784	0.0448232
2015-07-14	11:58:50	00:00:05	68.0833	1.13472	26.12	26.1201	40.77	51.0498	133.569	31.8176	33.2214	200								44.7929	119.569	23.8996	-11.9123		0.0600535	0.290068	0.0219249	0		0.0256932	0.138846	0.0329326	0.0442505
2015-07-14	11:58:55	00:00:05	68.1667	1.13611	26.12	26.1201	40.78	51.5015	126.074	37.3535	36.9461	200								45.2446	112.074	29.4355	-8.18759		0.0610278	0.26146	0.0306245	0		0.0258523	0.139447	0.0330552	0.0438509
2015-07-14	11:59:00	00:00:05	68.25	1.1375	26.12	26.1201	40.91	57.9041	144.336	28.1494	54.4586	200								51.6472	130.336	20.2314	9.32491		0.0754616	0.333091	0.0167828	0.00484517		0.02605	0.140283	0.0331175	0.0432748
2015-07-14	11:59:05	00:00:05	68.3333	1.13889	26.12	26.1201	40.9	57.373	134.863	31.5552	42.7917	200								51.1161	120.863	23.6372	-2.34199		0.0742208	0.295119	0.0215401	0		0.0262513	0.140997	0.0331747	0.0430338
2015-07-14	11:59:10	00:00:05	68.4167	1.14028	26.12	26.1201	40.91	57.9041	131.006	39.3372	32.5531	200								51.6472	117.006	31.4192	-12.5806		0.0754616	0.280159	0.0340017	0		0.026469	0.141733	0.0333054	0.0428048
2015-07-14	11:59:15	00:00:05	68.5	1.14167	26.12	26.1201	40.93	58.9722	131.006	23.114	40.3046	200								52.7153	117.006	15.196	-4.82909		0.0779804	0.280159	0.0106046	0		0.0266941	0.142385	0.033338	0.0426293
2015-07-14	11:59:20	00:00:05	68.5833	1.14306	26.12	26.1201	40.98	61.7676	131.006	36.0962	55.8746	200								55.5107	117.006	28.1782	10.7409		0.0847187	0.280159	0.0285536	0.0060784		0.0269604	0.143184	0.0334334	0.0422042
2015-07-14	11:59:25	00:00:05	68.6667	1.14444	26.12	26.1201	40.94	59.5215	141.553	36.0962	42.4896	200								53.2646	127.553	28.1782	-2.64409		0.0792878	0.321756	0.0285536	0		0.027197	0.144053	0.0335363	0.0419145
2015-07-14	11:59:30	00:00:05	68.75	1.14583	26.11	26.12	41	62.9272	136.182	44.0979	42.6392	200								56.6703	122.182	36.1799	-2.49449		0.0875752	0.300302	0.0426364	0		0.0274666	0.14499	0.0337135	0.0418394
2015-07-14	11:59:35	00:00:05	68.8333	1.14722	26.12	26.12	40.92	58.4351	136.182	31.5552	36.438	200								52.1782	122.182	23.6372	-8.69569		0.0767099	0.300302	0.0215401	0		0.0276981	0.145904	0.0337726	0.0412123
2015-07-14	11:59:40	00:00:05	68.9167	1.14861	26.12	26.12	40.95	60.0708	137.5	37.0361	34.3735	200								53.8139	123.5	29.1181	-10.7602		0.0806034	0.305515	0.0300966	0		0.0279512	0.146802	0.0338503	0.0411125
2015-07-14	11:59:45	00:00:05	69	1.15	26.12	26.12	40.96	60.6323	144.336	25.9857	48.3093	200								54.3754	130.336	18.0677	3.17561		0.0819567	0.333091	0.0139982	0.000860855		0.0282149	0.147801	0.0338974	0.0410382
2015-07-14	11:59:50	00:00:05	69.0833	1.15139	26.12	26.12	40.91	57.9041	142.92	37.3535	47.2809	200								51.6472	128.92	29.4355	2.14721		0.0754616	0.327305	0.0306245	0.000459543		0.028437	0.148821	0.0340046	0.0409562
2015-07-14	11:59:55	00:00:05	69.1667	1.15278	26.12	26.12	40.89	56.8604	145.728	37.3535	43.866	200								50.6035	131.728	29.4355	-1.26769		0.0730305	0.338815	0.0306245	0		0.0286546	0.14993	0.0341235	0.0407525
2015-07-14	12:00:00	00:00:05	69.25	1.15417	26.12	26.12	40.94	59.5215	151.514	39.6851	48.8373	200								53.2646	137.514	31.7671	3.70361		0.0792878	0.363001	0.0346076	0.00110173		0.0288926	0.15116	0.0342564	0.0406156
2015-07-14	12:00:05	00:00:05	69.3333	1.15556	26.11	26.12	40.85	54.834	132.275	41.4551	40.3046	200								48.5771	118.275	33.5371	-4.82909		0.0683967	0.285049	0.0377522	0		0.0290809	0.152136	0.0343498	0.0404656
2015-07-14	12:00:10	00:00:05	69.4167	1.15694	26.12	26.12	40.8	52.4292	128.516	32.8979	52.89	200								46.1723	114.516	24.9799	7.75631		0.0630473	0.270658	0.0235361	0.00360584		0.0292438	0.152944	0.0343885	0.0404442
2015-07-14	12:00:15	00:00:05	69.5	1.15833	26.12	26.1199	40.81	52.8931	140.186	29.0741	44.9707	200								46.6362	126.186	21.1561	-0.162991		0.0640665	0.316243	0.0180301	0		0.0294155	0.153886	0.0344151	0.0403886
2015-07-14	12:00:20	00:00:05	69.5833	1.15972	26.12	26.1199	40.73	49.2798	132.275	29.5502	40.0238	200								43.0229	118.275	21.6322	-5.10989		0.0562928	0.285049	0.0186853	0		0.0295454	0.154838	0.0344016	0.0402921
2015-07-14	12:00:25	00:00:05	69.6667	1.16111	26.11	26.1198	40.7	47.998	122.485	26.4038	42.3401	200								41.7411	108.485	18.4858	-2.79359		0.053627	0.24816	0.0145214	0		0.0296736	0.155656	0.0344597	0.040217
2015-07-14	12:00:30	00:00:05	69.75	1.1625	26.11	26.1197	40.73	49.2798	117.896	27.0386	46.6064	200								43.0229	103.896	19.1206	1.47271		0.0562928	0.231539	0.0153295	0.000250991		0.0298068	0.156385	0.0345213	0.0401928
2015-07-14	12:00:35	00:00:05	69.8333	1.16389	26.12	26.1197	40.67	46.7651	119.019	30.7861	39.0564	200								40.5082	105.019	22.8681	-6.07729		0.051109	0.235566	0.020427	0		0.0299084	0.156895	0.0346058	0.0401452
2015-07-14	12:00:40	00:00:05	69.9167	1.16528	26.12	26.1197	40.77	51.0498	103.271	41.8213	43.4021	200								44.7929	89.271	33.9033	-1.73159		0.0600535	0.181526	0.0384156	0		0.0300506	0.157419	0.0347472	0.040143
2015-07-14	12:00:45	00:00:05	70	1.16667	26.12	26.1197	40.76	50.5981	117.896	47.3755	43.0939	200								44.3412	103.896	39.4575	-2.03979		0.0590851	0.231539	0.0489994	0		0.0301764	0.158204	0.0349447	0.0401286
2015-07-14	12:00:50	00:00:05	70.0833	1.16806	26.12	26.1197	40.79	51.9653	117.896	44.4946	35.817	200								45.7084	103.896	36.5766	-9.31669		0.0620344	0.231539	0.0433888	0		0.0303182	0.158929	0.0351167	0.040124
2015-07-14	12:00:55	00:00:05	70.1667	1.16944	26.12	26.1197	40.8	52.4292	106.226	32.8979	50.6348	200								46.1723	92.226	24.9799	5.50111		0.0630473	0.19126	0.0235361	0.00207817		0.0304506	0.159453	0.0351988	0.0401326
2015-07-14	12:01:00	00:00:05	70.25	1.17083	26.12	26.1197	40.81	52.8931	107.227	33.7341	41.1621	200								46.6362	93.227	25.8161	-3.97159		0.0640665	0.194601	0.0248126	0		0.0305914	0.160147	0.0352765	0.0400806
2015-07-14	12:01:05	00:00:05	70.3333	1.17222	26.12	26.1197	40.77	51.0498	105.225	28.8391	39.4684	200								44.7929	91.225	20.9211	-5.66529		0.0600535	0.187941	0.0177099	0		0.0306938	0.160763	0.0353247	0.0400372
2015-07-14	12:01:10	00:00:05	70.4167	1.17361	26.12	26.1197	40.83	53.8574	110.303	46.1182	52.124	200								47.6005	96.303	38.2002	6.99031		0.0662045	0.205002	0.0465192	0.00305191		0.0308047	0.161496	0.0354978	0.0400276
2015-07-14	12:01:15	00:00:05	70.5	1.175	26.12	26.1197	40.82	53.3691	110.303	36.4075	54.2603	200								47.1122	96.303	28.4895	9.12661		0.0651186	0.205002	0.0290612	0.00468097		0.0309187	0.162114	0.0356006	0.0400471
2015-07-14	12:01:20	00:00:05	70.5833	1.17639	26.12	26.1197	40.89	56.8604	116.772	35.791	43.5547	200								50.6035	102.772	27.873	-1.57899		0.0730305	0.227534	0.0280591	0		0.0310631	0.162958	0.0356671	0.0399854
2015-07-14	12:01:25	00:00:05	70.6667	1.17778	26.12	26.1197	40.94	59.5215	106.226	34.8877	40.3046	200								53.2646	92.226	26.9697	-4.82909		0.0792878	0.19126	0.0266149	0		0.0312061	0.163662	0.0357577	0.0399489
2015-07-14	12:01:30	00:00:05	70.75	1.17917	26.12	26.1197	40.87	55.835	108.252	32.0862	68.042	200								49.5781	94.252	24.1682	22.9083		0.0706714	0.198044	0.0223215	0.0204846		0.0313102	0.164267	0.0358426	0.0400221
2015-07-14	12:01:35	00:00:05	70.8333	1.18056	26.12	26.1197	40.87	55.835	94.9463	33.7341	39.6057	200								49.5781	80.9463	25.8161	-5.52799		0.0706714	0.155148	0.0248126	0		0.0314173	0.164682	0.0359299	0.0399604
2015-07-14	12:01:40	00:00:05	70.9167	1.18194	26.12	26.1197	40.88	56.3416	94.9463	34.8877	30.6366	200								50.0847	80.9463	26.9697	-14.4971		0.0718333	0.155148	0.0266149	0		0.0315489	0.165145	0.0360364	0.039959
2015-07-14	12:01:45	00:00:05	71	1.18333	26.12	26.1197	40.86	55.3345	92.3462	50.9521	40.448	200								49.0776	78.3462	43.0341	-4.68569		0.0695306	0.147233	0.0563164	0		0.0316483	0.165604	0.036258	0.0399434
2015-07-14	12:01:50	00:00:05	71.0833	1.18472	26.12	26.1197	40.82	53.3691	86.5845	41.8213	49.1882	200								47.1122	72.5845	33.9033	4.05451		0.0651186	0.130255	0.0384156	0.00127389		0.03171	0.166067	0.0364047	0.0397986
2015-07-14	12:01:55	00:00:05	71.1667	1.18611	26.12	26.1197	40.73	49.2798	85.791	55.3711	44.812	200								43.0229	71.791	47.4531	-0.321691		0.0562928	0.127978	0.0658761	0		0.0317211	0.166509	0.0366467	0.0397406
2015-07-14	12:02:00	00:00:05	71.25	1.1875	26.12	26.1196	40.65	45.9595	74.9146	50.4883	31.6833	200								39.7026	60.9146	42.5703	-13.4504		0.0494885	0.0983314	0.055346	0		0.0316604	0.166851	0.0368428	0.0397295
2015-07-14	12:02:05	00:00:05	71.3333	1.18889	26.12	26.1196	40.61	44.4092	79.7852	54.8584	38.382	200								38.1523	65.7852	46.9404	-6.75169		0.0464256	0.111244	0.0647382	0		0.0315869	0.167191	0.0370819	0.0397127
2015-07-14	12:02:10	00:00:05	71.4167	1.19028	26.12	26.1196	40.63	45.1782	84.2407	54.8584	31.5765	200								38.9213	70.2407	46.9404	-13.5572		0.0479357	0.123574	0.0647382	0		0.0315153	0.167554	0.0373366	0.0397053
2015-07-14	12:02:15	00:00:05	71.5	1.19167	26.12	26.1195	40.53	41.4978	72.3022	50.9521	58.1848	200								35.2409	58.3022	43.0341	13.0511		0.0408754	0.0916554	0.0563164	0.00830802		0.0313959	0.167716	0.0374564	0.0397261
2015-07-14	12:02:20	00:00:05	71.5833	1.19306	26.12	26.1195	40.62	44.7937	106.226	40.0269	42.041	200								38.5368	92.226	32.1089	-3.09269		0.0471784	0.19126	0.0352068	0		0.0312832	0.168471	0.037577	0.0397092
2015-07-14	12:02:25	00:00:05	71.6667	1.19444	26.12	26.1195	40.63	45.1782	86.5845	39.0015	41.748	200								38.9213	72.5845	31.0835	-3.38569		0.0479357	0.130255	0.0334208	0		0.0311471	0.168955	0.037664	0.0396936
2015-07-14	12:02:30	00:00:05	71.75	1.19583	26.12	26.1195	40.6	44.0308	73.5962	39.6851	50.4517	200								37.7739	59.5962	31.7671	5.31801		0.0456893	0.0949401	0.0346076	0.00196834		0.0309903	0.169288	0.037726	0.0395473
2015-07-14	12:02:35	00:00:05	71.8333	1.19722	26.12	26.1195	40.6	44.0308	56.7139	44.4946	50.4517	200								37.7739	42.7139	36.5766	5.31801		0.0456893	0.0556458	0.0433888	0.00196834		0.0308611	0.16946	0.0378674	0.0395555
2015-07-14	12:02:40	00:00:05	71.9167	1.19861	26.12	26.1195	40.55	42.2058	66.1987	41.4551	50.2686	200								35.9489	52.1987	33.5371	5.13491		0.0422006	0.0767583	0.0377522	0.00186077		0.0307784	0.169671	0.038003	0.0395476
2015-07-14	12:02:45	00:00:05	72	1.2	26.12	26.1195	40.6	44.0308	60.7117	39.3372	61.2793	200								37.7739	46.7117	31.4192	16.1456		0.0456893	0.064233	0.0340017	0.0116874		0.0307145	0.169856	0.038131	0.0395334
2015-07-14	12:02:50	00:00:05	72.0833	1.20139	26.12	26.1196	40.54	41.8518	62.3047	50.9521	38.7848	200								35.5949	48.3047	43.0341	-6.34889		0.041536	0.0677826	0.0563164	0		0.0306206	0.170125	0.0383344	0.0395118
2015-07-14	12:02:55	00:00:05	72.1667	1.20278	26.12	26.1196	40.5	40.4663	59.1675	48.2422	36.438	200								34.2094	45.1675	40.3242	-8.69569		0.0389734	0.0608612	0.0507372	0		0.0305246	0.170354	0.0385085	0.0395036
2015-07-14	12:03:00	00:00:05	72.25	1.20417	26.12	26.1196	40.58	43.2861	59.6802	46.1182	51.5594	200								37.0292	45.6802	38.2002	6.42571		0.0442531	0.0619731	0.0465192	0.00266627		0.0304855	0.170481	0.0386644	0.039481
2015-07-14	12:03:05	00:00:05	72.3333	1.20556	26.11	26.1195	40.47	39.4714	50.0366	48.2422	59.7107	200								33.2145	36.0366	40.3242	14.577		0.0371713	0.0423659	0.0507372	0.00992027		0.0304096	0.170619	0.0388563	0.0395146
2015-07-14	12:03:10	00:00:05	72.4167	1.20694	26.12	26.1195	40.49	40.1367	56.7139	51.8921	39.8834	200								33.8798	42.7139	43.9741	-5.25029		0.0383728	0.0556458	0.0583025	0		0.0303387	0.17079	0.0390353	0.0395146
2015-07-14	12:03:15	00:00:05	72.5	1.20833	26.12	26.1195	40.41	37.5671	55.2917	44.4946	47.4487	200								31.3102	41.2917	36.5766	2.31501		0.0338126	0.0527039	0.0433888	0.000518492		0.0302666	0.171002	0.0391702	0.0394922
2015-07-14	12:03:20	00:00:05	72.5833	1.20972	26.12	26.1195	40.46	39.1479	47.2473	37.677	41.8945	200								32.891	33.2473	29.759	-3.23919		0.0365923	0.0372303	0.0311661	0		0.0302062	0.171133	0.039215	0.0394772
2015-07-14	12:03:25	00:00:05	72.6667	1.21111	26.12	26.1195	40.4	37.262	53.0212	43.7134	39.4684	200								31.0051	39.0212	35.7954	-5.66529		0.0332857	0.0481333	0.041912	0		0.0301662	0.1713	0.0393494	0.0393933
2015-07-14	12:03:30	00:00:05	72.75	1.2125	26.12	26.1195	40.39	36.9629	53.9185	55.3711	36.6913	200								30.706	39.9185	47.4531	-8.44239		0.0327721	0.0499209	0.0658761	0		0.0301325	0.171408	0.0396026	0.0393341
2015-07-14	12:03:35	00:00:05	72.8333	1.21389	26.12	26.1195	40.27	33.5632	53.9185	47.3755	34.14	200								27.3063	39.9185	39.4575	-10.9937		0.0271496	0.0499209	0.0489994	0		0.0300832	0.171543	0.0397247	0.0393276
2015-07-14	12:03:40	00:00:05	72.9167	1.21528	26.12	26.1195	40.16	30.7861	49.6216	44.0979	32.9971	200								24.5292	35.6216	36.1799	-12.1366		0.0228586	0.041586	0.0426364	0		0.0300186	0.171604	0.0398777	0.0392672
2015-07-14	12:03:45	00:00:05	73	1.21667	26.12	26.1195	40.32	34.9274	55.7617	48.2422	41.748	200								28.6705	41.7617	40.3242	-3.38569		0.0293579	0.0536695	0.0507372	0		0.0299884	0.171587	0.040063	0.039203
2015-07-14	12:03:50	00:00:05	73.0833	1.21806	26.12	26.1195	40.4	37.262	55.2917	54.3457	44.3359	200								31.0051	41.2917	46.4277	-0.797791		0.0332857	0.0527039	0.0636077	0		0.029954	0.171613	0.0402543	0.039203
2015-07-14	12:03:55	00:00:05	73.1667	1.21944	26.12	26.1195	40.42	37.8784	49.2188	50.9521	36.438	200								31.6215	35.2188	43.0341	-8.69569		0.0343535	0.0408344	0.0563164	0		0.0299398	0.171637	0.0403288	0.0391792
2015-07-14	12:04:00	00:00:05	73.25	1.22083	26.12	26.1195	40.22	32.2632	59.6802	42.5659	48.8373	200								26.0063	45.6802	34.6479	3.70361		0.0251064	0.0619731	0.0397778	0.00110173		0.0298967	0.171753	0.04032	0.039176
2015-07-14	12:04:05	00:00:05	73.3333	1.22222	26.12	26.1195	39.89	25.116	61.2366	51.4221	45.2942	200								18.8591	47.2366	43.5041	0.160509		0.0149946	0.0653946	0.0573062	7.17168e-06		0.0297861	0.17192	0.0404641	0.0391262
2015-07-14	12:04:10	00:00:05	73.4167	1.22361	26.12	26.1195	40.11	29.6204	63.3911	58.02	49.3683	200								23.3635	49.3911	50.102	4.23461		0.0211414	0.0702444	0.0718732	0.00136587		0.0297377	0.172048	0.0406997	0.0391319
2015-07-14	12:04:15	00:00:05	73.5	1.225	26.12	26.1195	40.11	29.6204	59.6802	56.9458	61.2793	200								23.3635	45.6802	49.0278	16.1456		0.0211414	0.0619731	0.0694175	0.0116874		0.0296709	0.172185	0.0408521	0.0391737
2015-07-14	12:04:20	00:00:05	73.5833	1.22639	26.12	26.1195	39.98	26.8463	74.9146	43.3228	48.1384	200								20.5894	60.9146	35.4048	3.00471		0.0172617	0.0983314	0.0411808	0.000787761		0.0295927	0.17253	0.0409256	0.039177
2015-07-14	12:04:25	00:00:05	73.6667	1.22778	26.11	26.1195	39.99	27.0477	72.937	41.4551	32.1152	200								20.7908	58.937	33.5371	-13.0185		0.0175333	0.0932613	0.0377522	0		0.0294843	0.172777	0.041051	0.0391294
2015-07-14	12:04:30	00:00:05	73.75	1.22917	26.12	26.1194	40.01	27.4567	78.3569	48.2422	40.8752	200								21.1998	64.3569	40.3242	-4.25849		0.0180898	0.107395	0.0507372	0		0.0293894	0.173134	0.0411803	0.0391156
2015-07-14	12:04:35	00:00:05	73.8333	1.23056	26.12	26.1194	40.01	27.4567	65.625	46.9482	49.1882	200								21.1998	51.625	39.0302	4.05451		0.0180898	0.0754096	0.0481511	0.00127389		0.0292713	0.173351	0.0413031	0.039107
2015-07-14	12:04:40	00:00:05	73.9167	1.23194	26.12	26.1194	40.05	28.2959	64.4958	58.5693	58.8318	200								22.039	50.4958	50.6513	13.6981		0.0192521	0.0727815	0.0731413	0.00897848		0.0291641	0.173521	0.0415391	0.0391427
2015-07-14	12:04:45	00:00:05	74	1.23333	26.12	26.1194	40.16	30.7861	71.6553	41.4551	46.109	200								24.5292	57.6553	33.5371	0.975309		0.0228586	0.0900296	0.0377522	0.000129594		0.029043	0.173664	0.0415307	0.0391433
2015-07-14	12:04:50	00:00:05	74.0833	1.23472	26.12	26.1194	40.18	31.2683	74.2554	41.4551	44.3359	200								25.0114	60.2554	33.5371	-0.797791		0.0235837	0.0966302	0.0377522	0		0.0289105	0.173873	0.0415648	0.0391414
2015-07-14	12:04:55	00:00:05	74.1667	1.23611	26.12	26.1194	40.13	30.0812	67.3706	47.3755	53.0823	200								23.8243	53.3706	39.4575	7.94861		0.0218142	0.0795411	0.0489994	0.0037503		0.0287706	0.173981	0.0416965	0.039157
2015-07-14	12:05:00	00:00:05	74.25	1.2375	26.12	26.1194	40.33	35.2112	76.9531	53.3508	43.4021	200								28.9543	62.9531	45.4328	-1.73159		0.0298254	0.103663	0.0614356	0		0.0286527	0.17415	0.0418862	0.039157
2015-07-14	12:05:05	00:00:05	74.3333	1.23889	26.12	26.1194	40.07	28.7292	72.3022	44.4946	55.6702	200								22.4723	58.3022	36.5766	10.5365		0.0198628	0.0916554	0.0433888	0.00589393		0.0284685	0.174274	0.0419438	0.039164
2015-07-14	12:05:10	00:00:05	74.4167	1.24028	26.12	26.1194	40.25	33.0322	71.6553	42.9443	53.6682	200								26.7753	57.6553	35.0263	8.53451		0.0263078	0.0900296	0.0404769	0.00420349		0.0283398	0.17428	0.0419732	0.0391248
2015-07-14	12:05:15	00:00:05	74.5	1.24167	26.12	26.1194	40.44	38.5071	77.6489	37.3535	61.5082	200								32.2502	63.6489	29.4355	16.3745		0.0354556	0.105507	0.0306245	0.0119543		0.0282373	0.174438	0.0419797	0.0391551
2015-07-14	12:05:20	00:00:05	74.5833	1.24306	26.12	26.1193	40.44	38.5071	79.0649	49.1272	59.7107	200								32.2502	65.0649	41.2092	14.577		0.0354556	0.109297	0.0525351	0.00992027		0.0281428	0.174518	0.041968	0.039142
2015-07-14	12:05:25	00:00:05	74.6667	1.24444	26.12	26.1193	40.43	38.1897	78.3569	39.6851	73.9441	200								31.9328	64.3569	31.7671	28.8104		0.0348975	0.107395	0.0346076	0.0295881		0.0280459	0.174634	0.0419823	0.0392503
2015-07-14	12:05:30	00:00:05	74.75	1.24583	26.12	26.1193	40.47	39.4714	81.9824	42.1875	86.1816	200								33.2145	67.9824	34.2695	41.0479		0.0371713	0.117264	0.0390833	0.0522057		0.0279879	0.174915	0.04207	0.0394678
2015-07-14	12:05:35	00:00:05	74.8333	1.24722	26.12	26.1193	40.55	42.2058	77.6489	56.9458	57.9712	200								35.9489	63.6489	49.0278	12.8375		0.0422006	0.105507	0.0694175	0.008091		0.0279763	0.175072	0.0421246	0.0394877
2015-07-14	12:05:40	00:00:05	74.9167	1.24861	26.12	26.1193	40.49	40.1367	70.3979	57.4768	57.5439	200								33.8798	56.3979	49.5588	12.4102		0.0383728	0.0869011	0.0706274	0.00766339		0.0279488	0.175206	0.0422821	0.0395154
2015-07-14	12:05:45	00:00:05	75	1.25	26.12	26.1193	40.47	39.4714	69.7876	52.8564	69.8608	200								33.2145	55.7876	44.9384	24.7271		0.0371713	0.0853976	0.0603668	0.0231552		0.0278838	0.175372	0.0424558	0.0396036
2015-07-14	12:05:50	00:00:05	75.0833	1.25139	26.12	26.1193	40.63	45.1782	76.2695	42.9443	73.3887	200								38.9213	62.2695	35.0263	28.255		0.0479357	0.101863	0.0404769	0.0286785		0.0279159	0.175434	0.0425246	0.0396808
2015-07-14	12:05:55	00:00:05	75.1667	1.25278	26.12	26.1193	40.61	44.4092	74.2554	41.8213	88.5437	200								38.1523	60.2554	33.9033	43.41		0.0464256	0.0966302	0.0384156	0.0571075		0.0279128	0.17556	0.04245	0.0398841
2015-07-14	12:06:00	00:00:05	75.25	1.25417	26.12	26.1193	40.64	45.5688	74.2554	47.3755	93.4814	200								39.3119	60.2554	39.4575	48.3477		0.0487097	0.0966302	0.0489994	0.0678794		0.0279508	0.175722	0.0424796	0.0401137
2015-07-14	12:06:05	00:00:05	75.3333	1.25556	26.11	26.1193	40.63	45.1782	74.2554	52.8564	94.5801	200								38.9213	60.2554	44.9384	49.4464		0.0479357	0.0966302	0.0603668	0.0703706		0.0279802	0.175799	0.0425765	0.0403646
2015-07-14	12:06:10	00:00:05	75.4167	1.25694	26.12	26.1193	40.59	43.6584	74.2554	46.1182	124.06	200								37.4015	60.2554	38.2002	78.9263		0.0449689	0.0966302	0.0465192	0.148985		0.0280352	0.175929	0.0426131	0.0409789
2015-07-14	12:06:15	00:00:05	75.5	1.25833	26.12	26.1193	40.6	44.0308	69.7876	51.4221	90.2771	200								37.7739	55.7876	43.5041	45.1434		0.0456893	0.0853976	0.0573062	0.0608091		0.0280912	0.176017	0.0426918	0.0412003
2015-07-14	12:06:20	00:00:05	75.5833	1.25972	26.12	26.1193	40.59	43.6584	74.9146	50.4883	91.333	200								37.4015	60.9146	42.5703	46.1993		0.0449689	0.0983314	0.055346	0.0631066		0.0281543	0.176215	0.0428013	0.041391
2015-07-14	12:06:25	00:00:05	75.6667	1.26111	26.12	26.1193	40.64	45.5688	76.9531	37.677	107.19	200								39.3119	62.9531	29.759	62.0563		0.0487097	0.103663	0.0311661	0.101304		0.0282228	0.176384	0.0427818	0.0417956
2015-07-14	12:06:30	00:00:05	75.75	1.2625	26.12	26.1193	40.7	47.998	74.2554	38.0005	108.038	200								41.7411	60.2554	30.0825	62.9043		0.053627	0.0966302	0.0317114	0.103534		0.0283433	0.17651	0.0427772	0.0422095
2015-07-14	12:06:35	00:00:05	75.8333	1.26389	26.12	26.1193	40.61	44.4092	76.2695	48.6816	126.05	200								38.1523	62.2695	40.7636	80.9163		0.0464256	0.101863	0.0516269	0.155056		0.0284182	0.176631	0.0427318	0.0428236
2015-07-14	12:06:40	00:00:05	75.9167	1.26528	26.12	26.1193	40.6	44.0308	69.7876	56.9458	115.07	200								37.7739	55.7876	49.0278	69.9363		0.0456893	0.0853976	0.0694175	0.122716		0.0284989	0.176816	0.0428524	0.0433047
2015-07-14	12:06:45	00:00:05	76	1.26667	26.12	26.1193	40.6	44.0308	67.3706	62.5854	124.06	200								37.7739	53.3706	54.6674	78.9263		0.0456893	0.0795411	0.0826639	0.148985		0.0285797	0.176916	0.0429364	0.0439092
2015-07-14	12:06:50	00:00:05	76.0833	1.26806	26.12	26.1193	40.57	42.9199	85.791	40.7349	142.065	200								36.663	71.791	32.8169	96.9313		0.0435532	0.127978	0.0364603	0.207151		0.0286549	0.1771	0.0427615	0.0447574
2015-07-14	12:06:55	00:00:05	76.1667	1.26944	26.12	26.1193	40.54	41.8518	69.7876	43.3228	141.504	200								35.5949	55.7876	35.4048	96.3703		0.041536	0.0853976	0.0411808	0.205232		0.0287297	0.177152	0.0426062	0.045566
2015-07-14	12:07:00	00:00:05	76.25	1.27083	26.12	26.1193	40.57	42.9199	85.791	39.6851	148.474	200								36.663	71.791	31.7671	103.34		0.0435532	0.127978	0.0346076	0.229556		0.0288065	0.177499	0.0426159	0.0464905
2015-07-14	12:07:05	00:00:05	76.3333	1.27222	26.12	26.1192	40.59	43.6584	65.625	34.021	131.689	200								37.4015	51.625	26.103	86.5553		0.0449689	0.0754096	0.0252564	0.17275		0.0289016	0.177555	0.0425745	0.0469723
2015-07-14	12:07:10	00:00:05	76.4167	1.27361	26.12	26.1192	40.59	43.6584	81.2378	35.1868	112.378	200								37.4015	67.2378	27.2688	67.2443		0.0449689	0.11521	0.0270899	0.115228		0.0290203	0.17788	0.0424527	0.0473193
2015-07-14	12:07:15	00:00:05	76.5	1.275	26.12	26.1192	40.59	43.6584	76.2695	39.0015	93.4814	200								37.4015	62.2695	31.0835	48.3477		0.0449689	0.101863	0.0334208	0.0678794		0.0291471	0.178006	0.0424319	0.047527
2015-07-14	12:07:20	00:00:05	76.5833	1.27639	26.11	26.1192	40.65	45.9595	71.0205	42.9443	65.0482	200								39.7026	57.0205	35.0263	19.9145		0.0494885	0.088445	0.0404769	0.0163632		0.0292982	0.178087	0.0423739	0.0475808
2015-07-14	12:07:25	00:00:05	76.6667	1.27778	26.12	26.1192	40.67	46.7651	85.0098	33.4534	65.7837	200								40.5082	71.0098	25.5354	20.65		0.051109	0.125752	0.0243813	0.0173433		0.0294414	0.178274	0.042215	0.0475614
2015-07-14	12:07:30	00:00:05	76.75	1.27917	26.12	26.1192	40.73	49.2798	87.3779	48.2422	83.5693	200								43.0229	73.3779	40.3242	38.4356		0.0562928	0.132546	0.0507372	0.0469799		0.0296164	0.178607	0.042236	0.0476792
2015-07-14	12:07:35	00:00:05	76.8333	1.28056	26.12	26.1192	40.69	47.583	76.9531	40.7349	57.9712	200								41.3261	62.9531	32.8169	12.8375		0.0527743	0.103663	0.0364603	0.008091		0.029741	0.178677	0.0421941	0.0475916
2015-07-14	12:07:40	00:00:05	76.9167	1.28194	26.12	26.1192	40.66	46.3623	65.625	51.8921	91.687	200								40.1054	51.625	43.9741	46.5533		0.0502963	0.0754096	0.0583025	0.063884		0.0298861	0.178682	0.0422103	0.0477896
2015-07-14	12:07:45	00:00:05	77	1.28333	26.11	26.1192	40.66	46.3623	72.937	32.6233	69.8608	200								40.1054	58.937	24.7053	24.7271		0.0502963	0.0932613	0.0231225	0.0231552		0.0300332	0.178631	0.042106	0.0478007
2015-07-14	12:07:50	00:00:05	77.0833	1.28472	26.12	26.1192	40.62	44.7937	71.6553	29.3091	94.2139	200								38.5368	57.6553	21.3911	49.0802		0.0471784	0.0900296	0.0183524	0.0695366		0.0301805	0.178753	0.0419479	0.0480288
2015-07-14	12:07:55	00:00:05	77.1667	1.28611	26.12	26.1192	40.56	42.5598	79.0649	35.4858	83.2458	200								36.3029	65.0649	27.5678	38.1121		0.0428691	0.109297	0.0275679	0.0463473		0.0303183	0.178894	0.0418586	0.0480583
2015-07-14	12:08:00	00:00:05	77.25	1.2875	26.12	26.1192	40.68	47.168	78.3569	43.3228	99.1089	200								40.9111	64.3569	35.4048	53.9752		0.0519269	0.107395	0.0411808	0.0809914		0.0304812	0.178924	0.0418673	0.0481866
2015-07-14	12:08:05	00:00:05	77.3333	1.28889	26.11	26.1191	40.61	44.4092	77.6489	32.3547	105.518	200								38.1523	63.6489	24.4367	60.3843		0.0464256	0.105507	0.0227206	0.096962		0.0306016	0.179008	0.0416969	0.0485314
2015-07-14	12:08:10	00:00:05	77.4167	1.29028	26.11	26.1191	40.61	44.4092	77.6489	37.3535	138.147	200								38.1523	63.6489	29.4355	93.0133		0.0464256	0.105507	0.0306245	0.193886		0.0307529	0.17918	0.0415198	0.0490891
2015-07-14	12:08:15	00:00:05	77.5	1.29167	26.12	26.1191	40.68	47.168	75.5859	59.6802	103.064	200								40.9111	61.5859	51.7622	57.9303		0.0519269	0.100075	0.0757314	0.0907194		0.0309087	0.179173	0.0415561	0.0492137
2015-07-14	12:08:20	00:00:05	77.5833	1.29306	26.12	26.1191	40.72	48.8464	82.7271	36.7188	127.563	200								42.5895	68.7271	28.8008	82.4293		0.055386	0.119331	0.0295722	0.159733		0.0311	0.179137	0.0414527	0.0497378
2015-07-14	12:08:25	00:00:05	77.6667	1.29444	26.12	26.1191	40.87	55.835	60.7117	43.3228	154.541	200								49.5781	46.7117	35.4048	109.407		0.0706714	0.064233	0.0411808	0.251553		0.0313592	0.178987	0.0414201	0.050554
2015-07-14	12:08:30	00:00:05	77.75	1.29583	26.12	26.1191	40.7	47.998	57.1899	35.4858	133.813	200								41.7411	43.1899	27.5678	88.6793		0.053627	0.0566438	0.0275679	0.1796		0.0315467	0.178671	0.0412407	0.0511456
2015-07-14	12:08:35	00:00:05	77.8333	1.29722	26.12	26.1191	40.77	51.0498	74.2554	23.2941	132.745	200								44.7929	60.2554	15.3761	87.6113		0.0600535	0.0966302	0.0108069	0.176143		0.0317593	0.178416	0.0409756	0.051689
2015-07-14	12:08:40	00:00:05	77.9167	1.29861	26.12	26.1191	40.73	49.2798	79.7852	27.9236	177.209	200								43.0229	65.7852	20.0056	132.075		0.0562928	0.111244	0.0164834	0.340249		0.0319634	0.178391	0.04075	0.0529057
2015-07-14	12:08:45	00:00:05	78	1.3	26.12	26.1191	40.78	51.5015	81.2378	30.5359	133.813	200								45.2446	67.2378	22.6179	88.6793		0.0610278	0.11521	0.0200697	0.1796		0.0321942	0.178201	0.0404952	0.0535018
2015-07-14	12:08:50	00:00:05	78.0833	1.30139	26.11	26.119	40.81	52.8931	76.9531	24.9817	105.518	200								46.6362	62.9531	17.0637	60.3843		0.0640665	0.103663	0.0127716	0.096962		0.032417	0.178081	0.0403055	0.053465
2015-07-14	12:08:55	00:00:05	78.1667	1.30278	26.11	26.119	40.84	54.3396	71.0205	25.1801	121.631	200								48.0827	57.0205	17.2621	76.4973		0.0672836	0.088445	0.0130106	0.141699		0.0326653	0.177994	0.0401821	0.0526741
2015-07-14	12:09:00	00:00:05	78.25	1.30417	26.11	26.119	40.84	54.3396	75.5859	31.5552	132.214	200								48.0827	61.5859	23.6372	87.0803		0.0672836	0.100075	0.0215401	0.174434		0.0329157	0.177849	0.0400567	0.0529924
2015-07-14	12:09:05	00:00:05	78.3333	1.30556	26.11	26.1189	40.87	55.835	68.5669	34.8877	134.338	200								49.5781	54.5669	26.9697	89.2043		0.0706714	0.0824202	0.0266149	0.181308		0.0331811	0.17764	0.0399449	0.053042
2015-07-14	12:09:10	00:00:05	78.4167	1.30694	26.11	26.1189	40.89	56.8604	68.5669	39.3372	157.678	200								50.6035	54.5669	31.4192	112.544		0.0730305	0.0824202	0.0340017	0.263222		0.03347	0.177504	0.0398894	0.053879
2015-07-14	12:09:15	00:00:05	78.5	1.30833	26.11	26.1188	40.9	57.373	72.3022	36.0962	166.15	200								51.1161	58.3022	28.1782	121.016		0.0742208	0.0916554	0.0285536	0.29572		0.033755	0.177388	0.0398111	0.0550096
2015-07-14	12:09:20	00:00:05	78.5833	1.30972	26.11	26.1188	40.82	53.3691	67.3706	26.4038	129.095	200								47.1122	53.3706	18.4858	83.9613		0.0651186	0.0795411	0.0145214	0.164521		0.0340092	0.177106	0.0395561	0.055562
2015-07-14	12:09:25	00:00:05	78.6667	1.31111	26.11	26.1187	40.83	53.8574	61.7676	25.1801	106.769	200								47.6005	47.7676	17.2621	61.6353		0.0662045	0.0665778	0.0130106	0.100204		0.0342688	0.176841	0.0394097	0.0557261
2015-07-14	12:09:30	00:00:05	78.75	1.3125	26.11	26.1187	40.8	52.4292	58.1726	48.6816	101.465	200								46.1723	44.1726	40.7636	56.3313		0.0630473	0.0587252	0.0516269	0.0867365		0.0345117	0.176393	0.0394806	0.0553677
2015-07-14	12:09:35	00:00:05	78.8333	1.31389	26.11	26.1187	40.79	51.9653	68.5669	25.9857	108.038	200								45.7084	54.5669	18.0677	62.9043		0.0620344	0.0824202	0.0139982	0.103534		0.0347525	0.17609	0.0393612	0.0556033
2015-07-14	12:09:40	00:00:05	78.9167	1.31528	26.11	26.1186	40.77	51.0498	59.6802	26.1932	99.1089	200								44.7929	45.6802	18.2752	53.9752		0.0600535	0.0619731	0.0142569	0.0809914		0.0349858	0.17569	0.0392335	0.0555094
2015-07-14	12:09:45	00:00:05	79	1.31667	26.11	26.1186	40.84	54.3396	59.6802	31.2988	116.907	200								48.0827	45.6802	23.3808	71.7733		0.0672836	0.0619731	0.0211665	0.127927		0.0352447	0.175205	0.0391501	0.0551546
2015-07-14	12:09:50	00:00:05	79.0833	1.31806	26.11	26.1185	40.88	56.3416	62.8418	44.0979	124.06	200								50.0847	48.8418	36.1799	78.9263		0.0718333	0.0689956	0.0426364	0.148985		0.0355288	0.174879	0.039147	0.0550694
2015-07-14	12:09:55	00:00:05	79.1667	1.31944	26.11	26.1185	40.85	54.834	67.9688	32.3547	104.694	200								48.5771	53.9688	24.4367	59.5603		0.0683967	0.080976	0.0227206	0.0948484		0.0358046	0.17471	0.0390189	0.0552297
2015-07-14	12:10:00	00:00:05	79.25	1.32083	26.11	26.1185	40.75	50.1526	52.1484	23.8403	77.6978	200								43.8957	38.1484	15.9223	32.5641		0.0581358	0.0464181	0.0114292	0.0360108		0.036023	0.174174	0.0387565	0.0550183
2015-07-14	12:10:05	00:00:05	79.3333	1.32222	26.11	26.1184	40.88	56.3416	49.2188	27.0386	82.9285	200								50.0847	35.2188	19.1206	37.7948		0.0718333	0.0408344	0.0153295	0.0457299		0.0363057	0.173662	0.0385553	0.0545881
2015-07-14	12:10:10	00:00:05	79.4167	1.32361	26.11	26.1184	40.86	55.3345	65.0635	26.4038	66.0278	200								49.0776	51.0635	18.4858	20.8941		0.0695306	0.0740984	0.0145214	0.0176733		0.036575	0.173132	0.0384007	0.0543988
2015-07-14	12:10:15	00:00:05	79.5	1.325	26.11	26.1183	40.89	56.8604	54.3701	24.0265	60.376	200								50.6035	40.3701	16.1085	15.2423		0.0730305	0.0508299	0.0116444	0.0106565		0.0368551	0.17256	0.0382919	0.0540818
2015-07-14	12:10:20	00:00:05	79.5833	1.32639	26.11	26.1183	40.78	51.5015	46.4844	31.0425	55.2612	200								45.2446	32.4844	23.1245	10.1275		0.0610278	0.0358695	0.0207956	0.00553128		0.0370868	0.171953	0.0381672	0.0538787
2015-07-14	12:10:25	00:00:05	79.6667	1.32778	26.11	26.1182	40.81	52.8931	48.4192	25.9857	73.3887	200								46.6362	34.4192	18.0677	28.255		0.0640665	0.0393575	0.0139982	0.0286785		0.037313	0.171515	0.0380447	0.0532056
2015-07-14	12:10:30	00:00:05	79.75	1.32917	26.11	26.1182	40.68	47.168	62.8418	38.6597	81.9763	200								40.9111	48.8418	30.7417	36.8426		0.0519269	0.0689956	0.0328333	0.043896		0.0375155	0.171059	0.0379549	0.0531191
2015-07-14	12:10:35	00:00:05	79.8333	1.33056	26.11	26.1182	40.77	51.0498	44.6533	35.791	75.0793	200								44.7929	30.6533	27.873	29.9456		0.0600535	0.032682	0.0280591	0.0314802		0.0377479	0.170465	0.037891	0.0526776
2015-07-14	12:10:40	00:00:05	79.9167	1.33194	26.11	26.1182	40.75	50.1526	56.2317	31.8176	62.8967	200								43.8957	42.2317	23.8996	17.763		0.0581358	0.0546416	0.0219249	0.0136215		0.0379835	0.169909	0.0377672	0.0517421
2015-07-14	12:10:45	00:00:05	80	1.33333	26.11	26.1182	40.84	54.3396	58.1726	21.579	60.6018	200								48.0827	44.1726	13.661	15.4681		0.0672836	0.0587252	0.0089395	0.0109108		0.0382539	0.169449	0.0375529	0.0514578
2015-07-14	12:10:50	00:00:05	80.0833	1.33472	26.11	26.1181	40.76	50.5981	40.2771	24.9817	54.4586	200								44.3412	26.2771	17.0637	9.32491		0.0590851	0.0255271	0.0127716	0.00484517		0.0384852	0.168862	0.0374285	0.0512052
2015-07-14	12:10:55	00:00:05	80.1667	1.33611	26.11	26.1181	40.81	52.8931	58.1726	22.5891	47.4487	200								46.6362	44.1726	14.6711	2.31501		0.0640665	0.0587252	0.0100232	0.000518492		0.0387334	0.16846	0.0372436	0.0502597
2015-07-14	12:11:00	00:00:05	80.25	1.3375	26.11	26.118	40.69	47.583	39.6545	34.3079	50.4517	200								41.3261	25.6545	26.3899	5.31801		0.0527743	0.0245639	0.0257031	0.00196834		0.0389416	0.167793	0.0370615	0.0497828
2015-07-14	12:11:05	00:00:05	80.3333	1.33889	26.11	26.118	40.77	51.0498	64.4958	30.0354	59.9304	200								44.7929	50.4958	22.1174	14.7967		0.0600535	0.0727815	0.0193621	0.0101612		0.0391799	0.167285	0.0368906	0.0495249
2015-07-14	12:11:10	00:00:05	80.4167	1.34028	26.11	26.118	40.63	45.1782	35.0677	34.8877	62.4329	200								38.9213	21.0677	26.9697	17.2992		0.0479357	0.0179094	0.0266149	0.0130555		0.0393515	0.166563	0.0367826	0.0488869
2015-07-14	12:11:15	00:00:05	80.5	1.34167	26.11	26.1179	40.68	47.168	59.1675	37.677	50.0854	200								40.9111	45.1675	29.759	4.95171		0.0519269	0.0608612	0.0311661	0.00175544		0.0395359	0.165992	0.036722	0.0481388
2015-07-14	12:11:20	00:00:05	80.5833	1.34306	26.11	26.1179	40.71	48.4192	53.0212	48.6816	66.2781	200								42.1623	39.0212	40.7636	21.1444		0.0544976	0.0481333	0.0516269	0.0180141		0.0397414	0.165523	0.0367852	0.0475868
2015-07-14	12:11:25	00:00:05	80.6667	1.34444	26.11	26.1178	40.64	45.5688	41.8945	49.5728	59.2712	200								39.3119	27.8945	41.6548	14.1375		0.0487097	0.0280938	0.0534493	0.0094449		0.0399202	0.164786	0.036789	0.0466154
2015-07-14	12:11:30	00:00:05	80.75	1.34583	26.11	26.1178	40.77	51.0498	47.6318	38.6597	51.1871	200								44.7929	33.6318	30.7417	6.05341		0.0600535	0.0379233	0.0328333	0.00242285		0.0401441	0.164104	0.0366366	0.046098
2015-07-14	12:11:35	00:00:05	80.8333	1.34722	26.11	26.1177	40.66	46.3623	34.8022	27.0386	48.1384	200								40.1054	20.8022	19.1206	3.00471		0.0502963	0.0175488	0.0153295	0.000787761		0.0403318	0.163394	0.0365133	0.0456313
2015-07-14	12:11:40	00:00:05	80.9167	1.34861	26.11	26.1177	40.74	49.7131	34.5428	50.4883	54.657	200								43.4562	20.5428	42.5703	9.52331		0.057205	0.0171991	0.055346	0.00501158		0.0405337	0.16276	0.0365567	0.0450314
2015-07-14	12:11:45	00:00:05	81	1.35	26.11	26.1177	40.79	51.9653	44.6533	50.9521	56.9092	200								45.7084	30.6533	43.0341	11.7755		0.0620344	0.032682	0.0563164	0.00704451		0.0407602	0.161949	0.0366168	0.0440685
2015-07-14	12:11:50	00:00:05	81.0833	1.35139	26.11	26.1176	40.8	52.4292	60.1929	28.6072	42.4896	200								46.1723	46.1929	20.6892	-2.64409		0.0630473	0.0630925	0.0173961	0		0.0409982	0.161311	0.0365206	0.0432372
2015-07-14	12:11:55	00:00:05	81.1667	1.35278	26.11	26.1176	40.87	55.835	53.0212	42.9443	51.001	200								49.5781	39.0212	35.0263	5.86731		0.0706714	0.0481333	0.0404769	0.00230449		0.041273	0.160643	0.03655	0.0428516
2015-07-14	12:12:00	00:00:05	81.25	1.35417	26.11	26.1175	40.92	58.4351	47.2473	38.6597	59.9304	200								52.1782	33.2473	30.7417	14.7967		0.0767099	0.0372303	0.0328333	0.0101612		0.0415696	0.160041	0.0366032	0.0425243
2015-07-14	12:12:05	00:00:05	81.3333	1.35556	26.11	26.1175	40.85	54.834	35.6018	37.677	65.5396	200								48.5771	21.6018	29.759	20.4059		0.0683967	0.0186432	0.0311661	0.0170156		0.0418304	0.159401	0.0366332	0.0415181
2015-07-14	12:12:10	00:00:05	81.4167	1.35694	26.11	26.1175	40.88	56.3416	49.6216	38.6597	50.4517	200								50.0847	35.6216	30.7417	5.31801		0.0718333	0.041586	0.0328333	0.00196834		0.0420876	0.15869	0.036677	0.0404094
2015-07-14	12:12:15	00:00:05	81.5	1.35833	26.11	26.1174	40.84	54.3396	54.8279	46.9482	49.3683	200								48.0827	40.8279	39.0302	4.23461		0.0672836	0.0517576	0.0481511	0.00136587		0.0423384	0.158123	0.0367523	0.0396668
2015-07-14	12:12:20	00:00:05	81.5833	1.35972	26.11	26.1174	40.87	55.835	50.8667	20.1691	46.6064	200								49.5781	36.8667	12.2511	1.47271		0.0706714	0.0439421	0.00750641	0.000250991		0.0426003	0.15739	0.0366872	0.0388047
2015-07-14	12:12:25	00:00:05	81.6667	1.36111	26.11	26.1173	40.84	54.3396	61.7676	27.6978	54.8584	200								48.0827	47.7676	19.7798	9.72471		0.0672836	0.0665778	0.016186	0.00518267		0.0428442	0.156884	0.0366314	0.0369961
2015-07-14	12:12:30	00:00:05	81.75	1.3625	26.11	26.1173	40.77	51.0498	63.3911	25.9857	46.2738	200								44.7929	49.3911	18.0677	1.14011		0.0600535	0.0702444	0.0139982	0.000166472		0.0430629	0.156394	0.0365845	0.0362042
2015-07-14	12:12:35	00:00:05	81.8333	1.36389	26.11	26.1172	40.65	45.9595	50.8667	42.9443	40.448	200								39.7026	36.8667	35.0263	-4.68569		0.0494885	0.0439421	0.0404769	0		0.0432015	0.155629	0.0365959	0.0353247
2015-07-14	12:12:40	00:00:05	81.9167	1.36528	26.11	26.1172	40.7	47.998	39.9658	33.1726	59.7107	200								41.7411	25.9658	25.2546	14.577		0.053627	0.0250438	0.0239526	0.00992027		0.0433959	0.154894	0.036521	0.0337252
2015-07-14	12:12:45	00:00:05	82	1.36667	26.11	26.1172	40.78	51.5015	72.3022	30.7861	44.812	200								45.2446	58.3022	22.8681	-0.321691		0.0610278	0.0916554	0.020427	0		0.0436182	0.154479	0.0363632	0.0331408
2015-07-14	12:12:50	00:00:05	82.0833	1.36806	26.11	26.1171	40.65	45.9595	67.3706	31.5552	40.7318	200								39.7026	53.3706	23.6372	-4.40189		0.0494885	0.0795411	0.0215401	0		0.0437773	0.15397	0.0362263	0.0326505
2015-07-14	12:12:55	00:00:05	82.1667	1.36944	26.11	26.1171	40.78	51.5015	51.2878	31.8176	48.3093	200								45.2446	37.2878	23.8996	3.17561		0.0610278	0.0447499	0.0219249	0.000860855		0.0439908	0.153303	0.0361658	0.0318986
2015-07-14	12:13:00	00:00:08	82.3	1.37167	26.11	26.117	40.74	49.7131	89.8193	28.8391	48.1384	200								43.4562	75.8193	20.9211	3.00471		0.057205	0.13969	0.0177099	0.000787761		0.0441909	0.153154	0.0360556	0.0311242
2015-07-14	12:13:08	00:00:02	82.3333	1.37222	26.11	26.117	40.76	50.5981	81.2378	30.0354	75.6531	200								44.3412	67.2378	22.1174	30.5194		0.0590851	0.11521	0.0193621	0.0324533		0.0443828	0.15278	0.0360042	0.0305873
2015-07-14	12:13:10	00:00:05	82.4167	1.37361	26.11	26.117	40.76	50.5981	61.7676	43.7134	58.3984	200								44.3412	47.7676	35.7954	13.2647		0.0590851	0.0665778	0.041912	0.0085272		0.0445625	0.152203	0.0360242	0.0302319
2015-07-14	12:13:15	00:00:05	82.5	1.375	26.11	26.1169	40.78	51.5015	69.165	31.0425	43.4021	200								45.2446	55.165	23.1245	-1.73159		0.0610278	0.0838741	0.0207956	0		0.0447553	0.151684	0.0359764	0.0297416
2015-07-14	12:13:20	00:00:05	82.5833	1.37639	26.11	26.1169	40.78	51.5015	79.0649	45.2942	49.0112	200								45.2446	65.0649	37.3762	3.87751		0.0610278	0.109297	0.0449202	0.00118587		0.0449553	0.151314	0.0360243	0.0294318
2015-07-14	12:13:25	00:00:05	82.6667	1.37778	26.11	26.1168	40.67	46.7651	79.7852	37.0361	44.4946	200								40.5082	65.7852	29.1181	-0.639091		0.051109	0.111244	0.0300966	0		0.0451368	0.150994	0.0359346	0.0293401
2015-07-14	12:13:30	00:00:05	82.75	1.37917	26.11	26.1168	40.67	46.7651	83.4839	46.1182	47.7936	200								40.5082	69.4839	38.2002	2.65991		0.051109	0.121446	0.0465192	0.000647867		0.0453177	0.150616	0.0359413	0.0290863
2015-07-14	12:13:35	00:00:05	82.8333	1.38056	26.11	26.1167	40.69	47.583	74.2554	47.3755	65.5396	200								41.3261	60.2554	39.4575	20.4059		0.0527743	0.0966302	0.0489994	0.0170156		0.0455238	0.150149	0.0359067	0.0290469
2015-07-14	12:13:40	00:00:05	82.9167	1.38194	26.11	26.1167	40.64	45.5688	84.2407	37.3535	58.8318	200								39.3119	70.2407	29.4355	13.6981		0.0487097	0.123574	0.0306245	0.00897848		0.0457215	0.149839	0.0358627	0.029045
2015-07-14	12:13:45	00:00:05	83	1.38333	26.11	26.1167	40.7	47.998	87.3779	34.021	50.0854	200								41.7411	73.3779	26.103	4.95171		0.053627	0.132546	0.0252564	0.00175544		0.0459366	0.149459	0.0357808	0.0290511
2015-07-14	12:13:50	00:00:05	83.0833	1.38472	26.11	26.1166	40.76	50.5981	85.791	42.1875	37.7228	200								44.3412	71.791	34.2695	-7.41089		0.0590851	0.127978	0.0390833	0		0.0461695	0.149124	0.0358402	0.0290348
2015-07-14	12:13:55	00:00:05	83.1667	1.38611	26.11	26.1166	40.76	50.5981	89.0015	32.6233	52.124	200								44.3412	75.0015	24.7053	6.99031		0.0590851	0.137281	0.0231225	0.00305191		0.0464054	0.148856	0.0358217	0.0290214
2015-07-14	12:14:00	00:00:05	83.25	1.3875	26.11	26.1165	40.71	48.4192	85.0098	44.4946	39.6057	200								42.1623	71.0098	36.5766	-5.52799		0.0544976	0.125752	0.0433888	0		0.0466153	0.148526	0.0358856	0.0290052
2015-07-14	12:14:05	00:00:05	83.3333	1.38889	26.11	26.1165	40.6	44.0308	90.6494	39.3372	57.9712	200								37.7739	76.6494	31.4192	12.8375		0.0456893	0.142151	0.0340017	0.008091		0.0467831	0.148153	0.0357885	0.0290356
2015-07-14	12:14:10	00:00:05	83.4167	1.39028	26.11	26.1165	40.55	42.2058	101.343	44.4946	44.3359	200								35.9489	87.343	36.5766	-0.797791		0.0422006	0.175279	0.0433888	0		0.0469264	0.148127	0.0358064	0.0290356
2015-07-14	12:14:15	00:00:05	83.5	1.39167	26.11	26.1164	40.54	41.8518	95.8252	59.1187	51.9348	200								35.5949	81.8252	51.2007	6.80111		0.041536	0.157859	0.074418	0.0029205		0.0470599	0.147853	0.0359226	0.0290413
2015-07-14	12:14:20	00:00:05	83.5833	1.39306	26.11	26.1164	40.45	38.8245	97.6318	40.7349	58.8318	200								32.5676	83.6318	32.8169	13.6981		0.036017	0.163487	0.0364603	0.00897848		0.047178	0.14768	0.0358048	0.0290691
2015-07-14	12:14:25	00:00:05	83.6667	1.39444	26.11	26.1163	40.49	40.1367	103.271	41.0889	63.1348	200								33.8798	89.271	33.1709	18.0011		0.0383728	0.181526	0.0370932	0.0139155		0.0472828	0.147521	0.0357443	0.0291271
2015-07-14	12:14:30	00:00:05	83.75	1.39583	26.11	26.1163	40.46	39.1479	100.403	40.3809	49.3683	200								32.891	86.403	32.4629	4.23461		0.0365923	0.172263	0.0358315	0.00136587		0.047381	0.147569	0.035642	0.0291328
2015-07-14	12:14:35	00:00:05	83.8333	1.39722	26.11	26.1163	40.35	35.7788	98.5352	43.3228	52.5085	200								29.5219	84.5352	35.4048	7.37481		0.0307688	0.166329	0.0411808	0.00332561		0.0474514	0.147393	0.035645	0.0291466
2015-07-14	12:14:40	00:00:05	83.9167	1.39861	26.11	26.1162	40.37	36.3647	105.225	39.3372	47.6196	200								30.1078	91.225	31.4192	2.48591		0.0317541	0.187941	0.0340017	0.000581243		0.0475402	0.147228	0.0356059	0.0291491
2015-07-14	12:14:45	00:00:05	84	1.4	26.11	26.1162	40.55	42.2058	105.225	56.4087	46.6064	200								35.9489	91.225	48.4907	1.47271		0.0422006	0.187941	0.0682017	0.000250991		0.0476583	0.147111	0.0357484	0.0291351
2015-07-14	12:14:50	00:00:05	84.0833	1.40139	26.11	26.1162	40.27	33.5632	110.303	44.4946	53.8635	200								27.3063	96.303	36.5766	8.72981		0.0271496	0.205002	0.0433888	0.00435884		0.047718	0.147065	0.0358081	0.0291532
2015-07-14	12:14:55	00:00:05	84.1667	1.40278	26.11	26.1161	40.22	32.2632	89.8193	40.7349	60.1532	200								26.0063	75.8193	32.8169	15.0195		0.0251064	0.13969	0.0364603	0.0104077		0.0477639	0.146864	0.0357695	0.0291966
2015-07-14	12:15:00	00:00:05	84.25	1.40417	26.11	26.1161	40.22	32.2632	106.226	44.8914	54.2603	200								26.0063	92.226	36.9734	9.12661		0.0251064	0.19126	0.0441463	0.00468097		0.0478332	0.146645	0.0357727	0.0292161
2015-07-14	12:15:05	00:00:05	84.3333	1.40556	26.11	26.116	40.36	36.0718	107.227	49.5728	54.657	200								29.8149	93.227	41.6548	9.52331		0.0312601	0.194601	0.0534493	0.00501158		0.0479293	0.146616	0.0359056	0.029237
2015-07-14	12:15:10	00:00:05	84.4167	1.40694	26.11	26.116	40.3	34.375	111.353	49.1272	45.4559	200								28.1181	97.353	41.2092	0.322209		0.0284559	0.208599	0.0525351	2.19307e-05		0.0479824	0.1466	0.0360097	0.0292371
2015-07-14	12:15:15	00:00:05	84.5	1.40833	26.11	26.116	40.31	34.6497	97.6318	50.9521	54.657	200								28.3928	83.6318	43.0341	9.52331		0.0289031	0.163487	0.0563164	0.00501158		0.0480477	0.1463	0.0360815	0.029258
2015-07-14	12:15:20	00:00:05	84.5833	1.40972	26.11	26.1159	40.43	38.1897	115.674	39.6851	60.1532	200								31.9328	101.674	31.7671	15.0195		0.0348975	0.223647	0.0346076	0.0104077		0.0481335	0.146216	0.036079	0.0293013
2015-07-14	12:15:25	00:00:05	84.6667	1.41111	26.11	26.1159	40.26	33.2947	112.427	42.5659	57.9712	200								27.0378	98.427	34.6479	12.8375		0.0267227	0.212302	0.0397778	0.008091		0.0481993	0.146011	0.0361376	0.029335
2015-07-14	12:15:30	00:00:05	84.75	1.4125	26.11	26.1158	40.27	33.5632	115.674	40.0269	51.7487	200								27.3063	101.674	32.1089	6.61501		0.0271496	0.223647	0.0352068	0.00279338		0.0482518	0.145944	0.0360871	0.0293448
2015-07-14	12:15:35	00:00:05	84.8333	1.41389	26.11	26.1158	40.18	31.2683	113.501	40.3809	71.1975	200								25.0114	99.501	32.4629	26.0638		0.0235837	0.21603	0.0358315	0.0251956		0.0482923	0.145929	0.0360524	0.0294497
2015-07-14	12:15:40	00:00:05	84.9167	1.41528	26.11	26.1157	40.13	30.0812	116.772	41.0889	63.6047	200								23.8243	102.772	33.1709	18.471		0.0218142	0.227534	0.0370932	0.0145027		0.0483323	0.145929	0.0360497	0.0295102
2015-07-14	12:15:45	00:00:05	85	1.41667	26.11	26.1157	40.32	34.9274	102.295	42.9443	66.7786	200								28.6705	88.295	35.0263	21.6449		0.0293579	0.178353	0.0404769	0.0187029		0.0483849	0.145707	0.0360555	0.0295881
2015-07-14	12:15:50	00:00:05	85.0833	1.41806	26.11	26.1157	40.44	38.5071	119.019	56.4087	46.9421	200								32.2502	105.019	48.4907	1.80841		0.0354556	0.235566	0.0682017	0.000348902		0.0484711	0.145819	0.036171	0.0295896
2015-07-14	12:15:55	00:00:05	85.1667	1.41944	26.11	26.1156	40.25	33.0322	117.896	46.5332	64.0808	200								26.7753	103.896	38.6152	18.9471		0.0263078	0.231539	0.0473325	0.015107		0.0485273	0.145768	0.036245	0.0296525
2015-07-14	12:16:00	00:00:05	85.25	1.42083	26.11	26.1156	40.34	35.4919	119.019	49.5728	51.3733	200								29.235	105.019	41.6548	6.23961		0.0302905	0.235566	0.0534493	0.0025435		0.048593	0.145733	0.0363235	0.0296631
2015-07-14	12:16:05	00:00:05	85.3333	1.42222	26.11	26.1155	40.09	29.1718	113.501	46.9482	50.4517	200								22.9149	99.501	39.0302	5.31801		0.020494	0.21603	0.0481511	0.00196834		0.0486241	0.145599	0.0363669	0.0296713
2015-07-14	12:16:10	00:00:05	85.4167	1.42361	26.11	26.1155	40.16	30.7861	120.166	34.5947	83.8867	200								24.5292	106.166	26.6767	38.753		0.0228586	0.239707	0.0261526	0.0476038		0.0486597	0.145451	0.036282	0.0298697
2015-07-14	12:16:15	00:00:05	85.5	1.425	26.11	26.1155	40.32	34.9274	112.427	42.5659	72.2839	200								28.6705	98.427	34.6479	27.1502		0.0293579	0.212302	0.0397778	0.0269012		0.0487145	0.145227	0.0361585	0.0299817
2015-07-14	12:16:20	00:00:05	85.5833	1.42639	26.11	26.1154	40.38	36.6638	112.427	34.3079	61.5082	200								30.4069	98.427	26.3899	16.3745		0.0322616	0.212302	0.0257031	0.0119543		0.0487674	0.14506	0.0360268	0.0300315
2015-07-14	12:16:25	00:00:05	85.6667	1.42778	26.11	26.1154	40.32	34.9274	122.485	33.4534	62.2009	200								28.6705	108.485	25.5354	17.0672		0.0293579	0.24816	0.0243813	0.0127758		0.0488017	0.14524	0.0359939	0.0300848
2015-07-14	12:16:30	00:00:05	85.75	1.42917	26.11	26.1153	40.27	33.5632	122.485	35.791	60.6018	200								27.3063	108.485	27.873	15.4681		0.0271496	0.24816	0.0280591	0.0109108		0.0488358	0.145309	0.0359667	0.030129
2015-07-14	12:16:35	00:00:05	85.8333	1.43056	26.11	26.1153	40.23	32.5195	117.896	30.5359	63.8428	200								26.2626	103.896	22.6179	18.7091		0.0255045	0.231539	0.0200697	0.0148038		0.048854	0.145184	0.0358352	0.0301907
2015-07-14	12:16:40	00:00:05	85.9167	1.43194	26.11	26.1152	40.23	32.5195	126.074	32.6233	62.4329	200								26.2626	112.074	24.7053	17.2992		0.0255045	0.26146	0.0231225	0.0130555		0.048854	0.145257	0.0358385	0.0302345
2015-07-14	12:16:45	00:00:05	86	1.43333	26.11	26.1152	40.28	33.8318	121.313	38.3301	73.1079	200								27.5749	107.313	30.4121	27.9742		0.0275793	0.243874	0.0322705	0.0282227		0.0488659	0.145292	0.0358581	0.0303517
2015-07-14	12:16:50	00:00:05	86.0833	1.43472	26.11	26.1152	40.26	33.2947	121.313	44.8914	72.5586	200								27.0378	107.313	36.9734	27.4249		0.0267227	0.243874	0.0441463	0.0273391		0.0488892	0.145439	0.0358343	0.0304639
2015-07-14	12:16:55	00:00:05	86.1667	1.43611	26.11	26.1152	40.14	30.3162	126.074	46.5332	55.2612	200								24.0593	112.074	38.6152	10.1275		0.0221603	0.26146	0.0473325	0.00553128		0.0489107	0.145401	0.0359448	0.030487
2015-07-14	12:17:00	00:00:05	86.25	1.4375	26.11	26.1152	40.25	33.0322	123.657	43.3228	66.2781	200								26.7753	109.657	35.4048	21.1444		0.0263078	0.252475	0.0411808	0.0180141		0.0489401	0.145401	0.0359671	0.030562
2015-07-14	12:17:05	00:00:05	86.3333	1.43889	26.11	26.1152	40.2	31.7627	119.019	40.3809	73.6633	200								25.5058	105.019	32.4629	28.5296		0.0243359	0.235566	0.0358315	0.0291269		0.0489352	0.145195	0.0360439	0.0306834
2015-07-14	12:17:10	00:00:05	86.4167	1.44028	26.11	26.1152	40.3	34.375	123.657	29.5502	81.665	200								28.1181	109.657	21.6322	36.5313		0.0284559	0.252475	0.0186853	0.0433026		0.0489555	0.145157	0.0360656	0.0308629
2015-07-14	12:17:15	00:00:05	86.5	1.44167	26.11	26.1152	40.31	34.6497	129.761	30.7861	67.2791	200								28.3928	115.761	22.8681	22.1454		0.0289031	0.275393	0.020427	0.0194015		0.0489714	0.14501	0.0359961	0.0309438
2015-07-14	12:17:20	00:00:05	86.5833	1.44306	26.11	26.1151	40.11	29.6204	126.074	28.8391	81.665	200								23.3635	112.074	20.9211	36.5313		0.0211414	0.26146	0.0177099	0.0433026		0.0489463	0.144952	0.0358657	0.0311242
2015-07-14	12:17:25	00:00:05	86.6667	1.44444	26.11	26.1151	40.18	31.2683	121.313	33.4534	80.1147	200								25.0114	107.313	25.5354	34.981		0.0235837	0.243874	0.0243813	0.040393		0.0489383	0.144969	0.0358257	0.0312918
2015-07-14	12:17:30	00:00:05	86.75	1.44583	26.1	26.1151	40.3	34.375	129.761	23.4741	129.614	200								28.1181	115.761	15.5561	84.4803		0.0284559	0.275393	0.0110105	0.166156		0.0489346	0.144753	0.0356369	0.0319841
2015-07-14	12:17:35	00:00:05	86.8333	1.44722	26.1	26.115	40.26	33.2947	127.271	35.791	76.5198	200								27.0378	113.271	27.873	31.3861		0.0267227	0.265954	0.0280591	0.0339442		0.0489197	0.144771	0.0355851	0.0321256
2015-07-14	12:17:40	00:00:05	86.9167	1.44861	26.1	26.115	40.2	31.7627	109.277	45.7031	74.2249	200								25.5058	95.277	37.7851	29.0912		0.0243359	0.20151	0.0457111	0.030052		0.0488757	0.14436	0.0356722	0.0322508
2015-07-14	12:17:45	00:00:05	87	1.45	26.1	26.1149	40.29	34.1003	119.019	45.2942	91.687	200								27.8434	105.019	37.3762	46.5533		0.0280113	0.235566	0.0449202	0.063884		0.0488537	0.144154	0.0357664	0.0325025
2015-07-14	12:17:50	00:00:05	87.0833	1.45139	26.11	26.1148	40.3	34.375	123.657	37.677	96.0632	200								28.1181	109.657	29.759	50.9295		0.0284559	0.252475	0.0311661	0.0737867		0.0488357	0.143818	0.0357546	0.03281
2015-07-14	12:17:55	00:00:05	87.1667	1.45278	26.11	26.1148	40.19	31.5125	110.303	31.0425	92.4011	200								25.2556	96.303	23.1245	47.2674		0.0239541	0.205002	0.0207956	0.0654631		0.0487968	0.143505	0.0357136	0.0330827
2015-07-14	12:18:00	00:00:05	87.25	1.45417	26.11	26.1147	40.19	31.5125	110.303	32.8979	96.4417	200								25.2556	96.303	24.9799	51.308		0.0239541	0.205002	0.0235361	0.0746683		0.0486905	0.143129	0.0357675	0.0333935
2015-07-14	12:18:05	00:00:05	87.3333	1.45556	26.11	26.1147	40.21	32.0099	123.657	24.7864	67.5354	200								25.753	109.657	16.8684	22.4017		0.0247153	0.252475	0.0125379	0.0197629		0.0485905	0.142817	0.0357712	0.0334758
2015-07-14	12:18:10	00:00:05	87.4167	1.45694	26.11	26.1147	40.22	32.2632	119.019	30.0354	152.698	200								26.0063	105.019	22.1174	107.564		0.0251064	0.235566	0.0193621	0.244791		0.0484567	0.142312	0.0357572	0.0344958
2015-07-14	12:18:15	00:00:05	87.5	1.45833	26.1	26.1146	40.19	31.5125	131.006	33.4534	86.1816	200								25.2556	117.006	25.5354	41.0479		0.0239541	0.280159	0.0243813	0.0522057		0.0482938	0.142116	0.0357196	0.0347133
2015-07-14	12:18:20	00:00:05	87.5833	1.45972	26.11	26.1145	40.39	36.9629	120.166	40.7349	112.378	200								30.706	106.166	32.8169	67.2443		0.0327721	0.239707	0.0364603	0.115228		0.048192	0.141927	0.0357196	0.0351818
2015-07-14	12:18:25	00:00:05	87.6667	1.46111	26.11	26.1145	40.24	32.7759	123.657	40.7349	111.06	200								26.519	109.657	32.8169	65.9263		0.025905	0.252475	0.0364603	0.111627		0.0480692	0.141749	0.0356999	0.0356469
2015-07-14	12:18:30	00:00:05	87.75	1.4625	26.1	26.1144	40.25	33.0322	117.896	34.5947	119.714	200								26.7753	103.896	26.6767	74.5803		0.0263078	0.231539	0.0261526	0.136047		0.0479366	0.141419	0.0357108	0.0362069
2015-07-14	12:18:35	00:00:05	87.8333	1.46389	26.11	26.1144	40.31	34.6497	110.303	31.0425	95.3186	200								28.3928	96.303	23.1245	50.1849		0.0289031	0.205002	0.0207956	0.072064		0.0478187	0.140837	0.0356941	0.0365071
2015-07-14	12:18:40	00:00:05	87.9167	1.46528	26.11	26.1143	40.42	37.8784	123.657	28.1494	76.5198	200								31.6215	109.657	20.2314	31.3861		0.0343535	0.252475	0.0167828	0.0339442		0.0477384	0.140525	0.0355413	0.0366486
2015-07-14	12:18:45	00:00:05	88	1.46667	26.11	26.1143	40.24	32.7759	120.166	32.6233	94.2139	200								26.519	106.166	24.7053	49.0802		0.025905	0.239707	0.0231225	0.0695366		0.0475794	0.140037	0.0354984	0.0369383
2015-07-14	12:18:50	00:00:05	88.0833	1.46806	26.1	26.1142	40.02	27.6642	128.516	22.0764	66.0278	200								21.4073	114.516	14.1584	20.8941		0.0183747	0.270658	0.0094673	0.0176733		0.0474057	0.139956	0.0354465	0.0370119
2015-07-14	12:18:55	00:00:05	88.1667	1.46944	26.1	26.1141	40.08	28.949	114.575	27.478	87.8601	200								22.6921	100.575	19.56	42.7264		0.0201754	0.219783	0.0158985	0.0556719		0.0472355	0.139782	0.0353851	0.0372439
2015-07-14	12:19:00	00:00:05	88.25	1.47083	26.1	26.114	39.95	26.2543	114.575	33.1726	102.258	200								19.9974	100.575	25.2546	57.1243		0.0164725	0.219783	0.0239526	0.0887034		0.0469897	0.13931	0.035415	0.0375933
2015-07-14	12:19:05	00:00:05	88.3333	1.47222	26.1	26.114	40.03	27.8748	119.019	46.9482	66.0278	200								21.6179	105.019	39.0302	20.8941		0.0186655	0.235566	0.0481511	0.0176733		0.0467582	0.139062	0.0355259	0.0376669
2015-07-14	12:19:10	00:00:05	88.4167	1.47361	26.11	26.1139	40.11	29.6204	122.485	24.9817	96.814	200								23.3635	108.485	17.0637	51.6803		0.0211414	0.24816	0.0127716	0.0755393		0.0465319	0.138929	0.0354374	0.0379817
2015-07-14	12:19:15	00:00:05	88.5	1.475	26.1	26.1138	40.02	27.6642	119.019	26.6113	67.7887	200								21.4073	105.019	18.6933	22.655		0.0183747	0.235566	0.0147837	0.0201225		0.0462835	0.138743	0.0354548	0.0380655
2015-07-14	12:19:20	00:00:05	88.5833	1.47639	26.1	26.1137	40.12	29.8523	129.761	26.6113	72.8333	200								23.5954	115.761	18.6933	27.6996		0.021479	0.275393	0.0147837	0.0277797		0.04602	0.138723	0.0353974	0.038156
2015-07-14	12:19:25	00:00:05	88.6667	1.47778	26.1	26.1137	40.02	27.6642	113.501	33.4534	81.0364	200								21.4073	99.501	25.5354	35.9027		0.0183747	0.21603	0.0243813	0.0421137		0.0457662	0.138282	0.0353801	0.0383314
2015-07-14	12:19:30	00:00:05	88.75	1.47917	26.1	26.1136	40.09	29.1718	113.501	27.9236	84.8633	200								22.9149	99.501	20.0056	39.7296		0.020494	0.21603	0.0164834	0.0495426		0.0454867	0.137931	0.0352711	0.0385379
2015-07-14	12:19:35	00:00:05	88.8333	1.48056	26.1	26.1135	40.15	30.5481	121.313	40.3809	103.876	200								24.2912	107.313	32.4629	58.7423		0.0225039	0.243874	0.0358315	0.0927677		0.0452608	0.137696	0.0353306	0.0389244
2015-07-14	12:19:40	00:00:05	88.9167	1.48194	26.1	26.1135	40.24	32.7759	123.657	40.3809	78.595	200								26.519	109.657	32.4629	33.4613		0.025905	0.252475	0.0358315	0.0376154		0.0450329	0.137475	0.0353545	0.0390811
2015-07-14	12:19:45	00:00:05	89	1.48333	26.1	26.1134	40.26	33.2947	115.674	34.3079	72.2839	200								27.0378	101.674	26.3899	27.1502		0.0267227	0.223647	0.0257031	0.0269012		0.0448028	0.137019	0.0354033	0.0391896
2015-07-14	12:19:50	00:00:05	89.0833	1.48472	26.1	26.1133	40.39	36.9629	117.896	22.0764	64.8071	200								30.706	103.896	14.1584	19.6734		0.0327721	0.231539	0.0094673	0.0160466		0.0446249	0.13662	0.0353151	0.0392546
2015-07-14	12:19:55	00:00:05	89.1667	1.48611	26.1	26.1132	40.42	37.8784	119.019	44.4946	67.5354	200								31.6215	105.019	36.5766	22.4017		0.0343535	0.235566	0.0433888	0.0197629		0.0444638	0.13619	0.0353683	0.0393369
2015-07-14	12:20:00	00:00:05	89.25	1.4875	26.1	26.1131	40.15	30.5481	126.074	25.9857	84.8633	200								24.2912	112.074	18.0677	39.7296		0.0225039	0.26146	0.0139982	0.0495426		0.0442272	0.135767	0.0352825	0.0395387
2015-07-14	12:20:05	00:00:05	89.3333	1.48889	26.1	26.1131	40.12	29.8523	111.353	35.4858	85.1929	200								23.5954	97.353	27.5678	40.0592		0.021479	0.208599	0.0275679	0.0502035		0.0440317	0.135448	0.03524	0.0397479
2015-07-14	12:20:10	00:00:05	89.4167	1.49028	26.1	26.113	40.2	31.7627	117.896	27.0386	77.9968	200								25.5058	103.896	19.1206	32.8631		0.0243359	0.231539	0.0153295	0.0365426		0.0438704	0.135285	0.0352058	0.0398852
2015-07-14	12:20:15	00:00:05	89.5	1.49167	26.1	26.1129	40.08	28.949	129.761	20.3186	73.3887	200								22.6921	115.761	12.4006	28.255		0.0201754	0.275393	0.00765388	0.0286785		0.0436875	0.135115	0.0351626	0.0400047
2015-07-14	12:20:20	00:00:05	89.5833	1.49306	26.1	26.1128	39.97	26.6479	126.074	23.4741	77.1057	200								20.391	112.074	15.5561	31.972		0.0169956	0.26146	0.0110105	0.0349663		0.0435238	0.135017	0.0351306	0.0401504
2015-07-14	12:20:25	00:00:05	89.6667	1.49444	26.1	26.1128	39.95	26.2543	120.166	27.9236	77.4048	200								19.9974	106.166	20.0056	32.2711		0.0164725	0.239707	0.0164834	0.0354925		0.043369	0.134982	0.0351388	0.0402982
2015-07-14	12:20:30	00:00:05	89.75	1.49583	26.1	26.1127	39.78	23.1903	124.854	33.4534	90.2771	200								16.9334	110.854	25.5354	45.1434		0.0126155	0.25691	0.0243813	0.0608091		0.043187	0.135087	0.0351765	0.0405506
2015-07-14	12:20:35	00:00:05	89.8333	1.49722	26.1	26.1127	39.76	22.8607	123.657	37.0361	69.8608	200								16.6038	109.657	29.1181	24.7271		0.0122239	0.252475	0.0300966	0.0231552		0.0430249	0.135158	0.0352168	0.040647
2015-07-14	12:20:40	00:00:05	89.9167	1.49861	26.1	26.1126	39.77	23.0255	116.772	29.0741	77.1057	200								16.7686	102.772	21.1561	31.972		0.0124191	0.227534	0.0180301	0.0349663		0.0428265	0.135349	0.0351319	0.0407927
2015-07-14	12:20:45	00:00:05	90	1.5	26.1	26.1125	40.03	27.8748	131.006	19.0094	93.1213	200								21.6179	117.006	11.0914	47.9876		0.0186655	0.280159	0.00639967	0.0670703		0.042658	0.135552	0.0349544	0.0410722
2015-07-14	12:20:50	00:00:05	90.0833	1.50139	26.1	26.1124	40.07	28.7292	124.854	32.3547	59.491	200								22.4723	110.854	24.4367	14.3573		0.0198628	0.25691	0.0227206	0.00968154		0.0424823	0.135658	0.0348682	0.0411125
2015-07-14	12:20:55	00:00:05	90.1667	1.50278	26.09	26.1123	39.85	24.3927	119.019	25.9857	80.7251	200								18.1358	105.019	18.0677	35.5914		0.0140829	0.235566	0.0139982	0.0415295		0.0422783	0.135842	0.0348285	0.0412769
2015-07-14	12:21:00	00:00:05	90.25	1.50417	26.1	26.1122	39.76	22.8607	132.275	32.6233	98.7244	200								16.6038	118.275	24.7053	53.5907		0.0122239	0.285049	0.0231225	0.080068		0.0420623	0.136219	0.0348215	0.0416105
2015-07-14	12:21:05	00:00:05	90.3333	1.50556	26.1	26.1121	39.77	23.0255	119.019	37.0361	85.1929	200								16.7686	105.019	29.1181	40.0592		0.0124191	0.235566	0.0300966	0.0502035		0.0418638	0.136418	0.0348731	0.0418197
2015-07-14	12:21:10	00:00:05	90.4167	1.50694	26.1	26.112	39.85	24.3927	121.313	24.0265	96.4417	200								18.1358	107.313	16.1085	51.308		0.0140829	0.243874	0.0116444	0.0746683		0.0416467	0.13658	0.0347278	0.0421181
2015-07-14	12:21:15	00:00:05	90.5	1.50833	26.1	26.112	39.65	21.1517	114.575	27.2583	78.595	200								14.8948	100.575	19.3403	33.4613		0.0102694	0.219783	0.015613	0.0376154		0.0414181	0.136641	0.0346717	0.0422553
2015-07-14	12:21:20	00:00:05	90.5833	1.50972	26.1	26.1119	39.67	21.4508	132.275	20.9381	84.8633	200								15.1939	118.275	13.0201	39.7296		0.0106022	0.285049	0.00827638	0.0495426		0.041158	0.136881	0.0345893	0.0424618
2015-07-14	12:21:25	00:00:05	90.6667	1.51111	26.1	26.1118	39.81	23.6969	116.772	23.8403	72.0093	200								17.44	102.772	15.9223	26.8756		0.0132263	0.227534	0.0114292	0.0264661		0.0408827	0.137032	0.034526	0.042572
2015-07-14	12:21:30	00:00:05	90.75	1.5125	26.1	26.1117	39.66	21.3013	127.271	21.579	101.068	200								15.0444	113.271	13.661	55.9343		0.0104354	0.265954	0.0089395	0.0857581		0.0406318	0.137315	0.0344703	0.042844
2015-07-14	12:21:35	00:00:05	90.8333	1.51389	26.09	26.1116	39.56	19.873	121.313	15.1215	93.1213	200								13.6161	107.313	7.2035	47.9876		0.00889239	0.243874	0.00320257	0.0670703		0.0403743	0.137685	0.0343802	0.0431235
2015-07-14	12:21:40	00:00:05	90.9167	1.51528	26.09	26.1115	39.36	17.3676	126.074	17.2943	87.5244	200								11.1107	112.074	9.3763	42.3907		0.00641751	0.26146	0.00488807	0.054972		0.0401018	0.138128	0.0342897	0.0433525
2015-07-14	12:21:45	00:00:05	91	1.51667	26.09	26.1113	39.7	21.9086	116.772	15.9927	72.0093	200								15.6517	102.772	8.0747	26.8756		0.0111192	0.227534	0.00384618	0.0264661		0.0398584	0.138462	0.0340711	0.0434628
2015-07-14	12:21:50	00:00:05	91.0833	1.51806	26.09	26.1112	39.38	17.5995	131.006	20.4712	85.5225	200								11.3426	117.006	12.5532	40.3888		0.00663371	0.280159	0.00780551	0.0508677		0.0396147	0.139087	0.0339435	0.0436694
2015-07-14	12:21:55	00:00:05	91.1667	1.51944	26.09	26.1111	39.33	17.0273	131.006	22.2473	83.2458	200								10.7704	117.006	14.3293	38.1121		0.00610516	0.280159	0.00965126	0.0463473		0.0394056	0.139721	0.0337092	0.0438626
2015-07-14	12:22:00	00:00:05	91.25	1.52083	26.1	26.111	39.3	16.6962	122.485	24.2126	127.057	200								10.4393	108.485	16.2946	81.9233		0.00580692	0.24816	0.0118609	0.158163		0.0392236	0.140345	0.0335281	0.0445216
2015-07-14	12:22:05	00:00:05	91.3333	1.52222	26.1	26.1109	39.47	18.692	133.569	23.4741	101.068	200								12.4351	119.569	15.5561	55.9343		0.00768803	0.290068	0.0110105	0.0857581		0.0390622	0.14109	0.0333042	0.0448789
2015-07-14	12:22:10	00:00:05	91.4167	1.52361	26.1	26.1108	39.7	21.9086	140.186	15.77	89.2334	200								15.6517	126.186	7.852	44.0997		0.0111192	0.316243	0.00367746	0.0585699		0.0389088	0.141893	0.0330498	0.0451229
2015-07-14	12:22:15	00:00:05	91.5	1.525	26.1	26.1108	39.29	16.5863	121.313	22.7631	71.1975	200								10.3294	107.313	14.8451	26.0638		0.00570918	0.243874	0.0102145	0.0251956		0.0387623	0.142527	0.0328577	0.0451933
2015-07-14	12:22:20	00:00:05	91.5833	1.52639	26.1	26.1107	39.37	17.4835	137.5	14.212	97.9553	200								11.2266	123.5	6.294	52.8216		0.00652523	0.305515	0.00257916	0.0782328		0.0385929	0.143003	0.0327217	0.0455193
2015-07-14	12:22:25	00:00:05	91.6667	1.52778	26.1	26.1106	39.25	16.1606	137.5	18.4601	97.9553	200								9.90367	123.5	10.5421	52.8216		0.0053365	0.305515	0.00589895	0.0782328		0.0384154	0.143734	0.0326071	0.0458452
2015-07-14	12:22:30	00:00:05	91.75	1.52917	26.1	26.1105	39.33	17.0273	140.186	24.0265	74.5117	200								10.7704	126.186	16.1085	29.378		0.00610516	0.316243	0.0116444	0.0305286		0.0382504	0.144656	0.0325114	0.0459642
2015-07-14	12:22:35	00:00:05	91.8333	1.53056	26.1	26.1104	39.23	15.9531	134.863	25.3784	73.1079	200								9.69617	120.863	17.4604	27.9742		0.00515829	0.295119	0.0132512	0.0282227		0.0380816	0.145654	0.0323858	0.0460736
2015-07-14	12:22:40	00:00:05	91.9167	1.53194	26.1	26.1103	39.43	18.1961	141.553	15.4419	73.6633	200								11.9392	127.553	7.5239	28.5296		0.00720221	0.321756	0.00343411	0.0291269		0.0379357	0.146674	0.0322428	0.0461872
2015-07-14	12:22:45	00:00:05	92	1.53333	26.1	26.1103	39.33	17.0273	141.553	14.4073	72.8333	200								10.7704	127.553	6.4893	27.6996		0.00610516	0.321756	0.00270872	0.0277797		0.0377708	0.147747	0.0321124	0.0462543
2015-07-14	12:22:50	00:00:05	92.0833	1.53472	26.1	26.1102	39.04	14.1403	148.608	19.2902	63.1348	200								7.88337	134.608	11.3722	18.0011		0.00370105	0.350775	0.00666153	0.0139155		0.0376132	0.148927	0.0319055	0.0463123
2015-07-14	12:22:55	00:00:05	92.1667	1.53611	26.1	26.1101	39.25	16.1606	137.5	20.0195	61.969	200								9.90367	123.5	12.1015	16.8353		0.0053365	0.305515	0.00735992	0.0124985		0.037473	0.149946	0.0317248	0.0463644
2015-07-14	12:23:00	00:00:05	92.25	1.5375	26.1	26.11	39.3	16.6962	134.863	27.478	71.1975	200								10.4393	120.863	19.56	26.0638		0.00580692	0.295119	0.0158985	0.0251956		0.0373128	0.150917	0.0315972	0.0464582
2015-07-14	12:23:05	00:00:05	92.3333	1.53889	26.1	26.11	39.49	18.9468	137.5	23.2941	54.8584	200								12.6899	123.5	15.3761	9.72471		0.00794227	0.305515	0.0108069	0.00518267		0.037191	0.152014	0.0314308	0.0464385
2015-07-14	12:23:10	00:00:05	92.4167	1.54028	26.1	26.1099	39.34	17.1387	140.186	21.579	67.5354	200								10.8818	126.186	13.661	22.4017		0.00620677	0.316243	0.0089395	0.0197629		0.037057	0.1531	0.0312252	0.0465208
2015-07-14	12:23:15	00:00:05	92.5	1.54167	26.1	26.1098	39.5	19.0765	150.049	23.6572	48.6603	200								12.8196	136.049	15.7392	3.52661		0.00807288	0.356818	0.0112191	0.0010185		0.0369497	0.154367	0.0310911	0.0465229
2015-07-14	12:23:20	00:00:05	92.5833	1.54306	26.1	26.1097	38.78	12.0651	148.608	16.1072	44.4946	200								5.80817	134.608	8.1892	-0.639091		0.00226735	0.350775	0.00393404	0		0.0368067	0.155673	0.0309776	0.0465229
2015-07-14	12:23:25	00:00:05	92.6667	1.54444	26.1	26.1096	38.89	12.8922	129.761	27.6978	51.001	200								6.63527	115.761	19.7798	5.86731		0.00280712	0.275393	0.016186	0.00230449		0.0366797	0.15662	0.0308705	0.0465325
2015-07-14	12:23:30	00:00:05	92.75	1.54583	26.1	26.1095	39.26	16.2659	132.275	13.3698	48.4863	200								10.009	118.275	5.4518	3.35261		0.0054278	0.285049	0.00204837	0.000939104		0.0365658	0.1576	0.0306045	0.0465364
2015-07-14	12:23:35	00:00:05	92.8333	1.54722	26.1	26.1095	39.2	15.6479	148.608	18.1915	42.1906	200								9.39097	134.608	10.2735	-2.94309		0.00490035	0.350775	0.00565973	0		0.0364731	0.158853	0.0304239	0.0465364
2015-07-14	12:23:40	00:00:05	92.9167	1.54861	26.1	26.1094	38.82	12.3581	150.049	26.4038	40.5884	200								6.10117	136.049	18.4858	-4.54529		0.00245359	0.356818	0.0145214	0		0.0363881	0.160167	0.0303068	0.0465364
2015-07-14	12:23:45	00:00:05	93	1.55	26.1	26.1093	39.03	14.0518	151.514	24.9817	49.9054	200								7.79487	137.514	17.0637	4.77171		0.00363463	0.363001	0.0127716	0.00165422		0.0362809	0.161456	0.0301486	0.0465433
2015-07-14	12:23:50	00:00:05	93.0833	1.55139	26.09	26.1092	38.73	11.7126	136.182	10.9039	48.1384	200								5.45567	122.182	2.9859	3.00471		0.00205071	0.300302	0.000779866	0.000787761		0.0361507	0.162487	0.0298868	0.0465466
2015-07-14	12:23:55	00:00:05	93.1667	1.55278	26.09	26.109	39.09	14.5905	134.863	27.6978	37.854	200								8.33357	120.863	19.7798	-7.27969		0.00404587	0.295119	0.016186	0		0.0360245	0.163547	0.0297196	0.0465466
2015-07-14	12:24:00	00:00:05	93.25	1.55417	26.09	26.1089	39.23	15.9531	140.186	20.3186	53.6682	200								9.69617	126.186	12.4006	8.53451		0.00515829	0.316243	0.00765388	0.00420349		0.0359413	0.164606	0.0295857	0.0465595
2015-07-14	12:24:05	00:00:05	93.3333	1.55556	26.09	26.1088	39.15	15.155	126.074	28.1494	34.14	200								8.89807	112.074	20.2314	-10.9937		0.00449438	0.26146	0.0167828	0		0.0358976	0.165423	0.0294169	0.0465595
2015-07-14	12:24:10	00:00:05	93.4167	1.55694	26.1	26.1087	39.43	18.1961	142.92	23.8403	40.5884	200								11.9392	128.92	15.9223	-4.54529		0.00720221	0.327305	0.0114292	0		0.0358395	0.166494	0.029165	0.0465538
2015-07-14	12:24:15	00:00:05	93.5	1.55833	26.09	26.1086	38.97	13.5391	133.569	27.6978	42.041	200								7.28217	119.569	19.7798	-3.09269		0.00325886	0.290068	0.016186	0		0.035765	0.167445	0.0289432	0.0465051
2015-07-14	12:24:20	00:00:05	93.5833	1.55972	26.09	26.1085	39.04	14.1403	148.608	16.687	40.0238	200								7.88337	134.608	8.769	-5.10989		0.00370105	0.350775	0.00439027	0		0.0357085	0.168497	0.02879	0.0465018
2015-07-14	12:24:25	00:00:05	93.6667	1.56111	26.1	26.1084	39.44	18.3182	144.336	16.3361	27.3666	200								12.0613	130.336	8.4181	-17.7671		0.00732072	0.333091	0.0041119	0		0.0356659	0.169496	0.0286498	0.0465018
2015-07-14	12:24:30	00:00:05	93.75	1.5625	26.1	26.1083	38.85	12.5839	145.728	23.6572	38.5162	200								6.32697	131.728	15.7392	-6.61749		0.00260086	0.338815	0.0112191	0		0.0356014	0.17046	0.0284851	0.0465018
2015-07-14	12:24:35	00:00:05	93.8333	1.56389	26.1	26.1083	38.9	12.9715	133.569	13.0142	25.6363	200								6.71457	119.569	5.0962	-19.4974		0.00286112	0.290068	0.00183833	0		0.035538	0.171355	0.0282922	0.0464965
2015-07-14	12:24:40	00:00:05	93.9167	1.56528	26.1	26.1082	39.07	14.4089	136.182	12.6709	33.4473	200								8.15197	122.182	4.7529	-11.6864		0.00390539	0.300302	0.00164377	0		0.035474	0.172303	0.0279943	0.0464591
2015-07-14	12:24:45	00:00:05	94	1.56667	26.1	26.1081	39.25	16.1606	138.818	14.6088	33.5632	200								9.90367	124.818	6.6908	-11.5705		0.0053365	0.310762	0.00284489	0		0.035401	0.173222	0.0278488	0.0464586
2015-07-14	12:24:50	00:00:05	94.0833	1.56806	26.1	26.108	39.26	16.2659	144.336	12.0193	51.5594	200								10.009	130.336	4.1013	6.42571		0.0054278	0.333091	0.00129755	0.00266627		0.0353254	0.174208	0.0276969	0.0464697
2015-07-14	12:24:55	00:00:05	94.1667	1.56944	26.1	26.1079	39.28	16.4795	145.728	17.0486	45.9442	200								10.2226	131.728	9.1306	0.810509		0.00561479	0.338815	0.00468425	9.63046e-05		0.0352579	0.175288	0.0275123	0.0464545
2015-07-14	12:25:00	00:00:05	94.25	1.57083	26.1	26.1078	39.16	15.2527	129.761	17.1722	49.3683	200								8.99577	115.761	9.2542	4.23461		0.0045738	0.275393	0.00478638	0.00136587		0.0351526	0.176003	0.0272762	0.0464601
2015-07-14	12:25:05	00:00:05	94.3333	1.57222	26.1	26.1078	39.29	16.5863	138.818	13.1012	36.3129	200								10.3294	124.818	5.1832	-8.82079		0.00570918	0.310762	0.00188892	0		0.0350937	0.176916	0.0271033	0.0464356
2015-07-14	12:25:10	00:00:05	94.4167	1.57361	26.1	26.1077	38.83	12.4329	134.863	26.6113	33.5632	200								6.17597	120.863	18.6933	-11.5705		0.00250202	0.295119	0.0147837	0		0.0349945	0.177771	0.0269963	0.0464181
2015-07-14	12:25:15	00:00:05	94.5	1.575	26.1	26.1076	39.14	15.0589	138.818	24.2126	48.4863	200								8.80197	124.818	16.2946	3.35261		0.00441678	0.310762	0.0118609	0.000939104		0.0348651	0.178626	0.0269181	0.0463722
2015-07-14	12:25:20	00:00:05	94.5833	1.57639	26.1	26.1075	39.16	15.2527	127.271	26.825	38.6505	200								8.99577	113.271	18.907	-6.48319		0.0045738	0.265954	0.0150557	0		0.0347365	0.179279	0.0267619	0.0463308
2015-07-14	12:25:25	00:00:05	94.6667	1.57778	26.1	26.1074	39.23	15.9531	134.863	31.5552	41.1621	200								9.69617	120.863	23.6372	-3.97159		0.00515829	0.295119	0.0215401	0		0.0346126	0.180061	0.0267075	0.0462076
2015-07-14	12:25:30	00:00:05	94.75	1.57917	26.09	26.1073	39.38	17.5995	132.275	23.4741	38.382	200								11.3426	118.275	15.5561	-6.75169		0.00663371	0.285049	0.0110105	0		0.0344853	0.18076	0.0265905	0.04599
2015-07-14	12:25:35	00:00:05	94.8333	1.58056	26.09	26.1072	39.24	16.0568	128.516	27.9236	46.4417	200								9.79987	114.516	20.0056	1.30801		0.00524707	0.270658	0.0164834	0.000207512		0.0343313	0.181448	0.0263699	0.0459572
2015-07-14	12:25:40	00:00:05	94.9167	1.58194	26.09	26.107	38.84	12.5076	115.674	31.5552	41.1621	200								6.25067	101.674	23.6372	-3.97159		0.00255074	0.223647	0.0215401	0		0.0341821	0.182018	0.0261654	0.0459253
2015-07-14	12:25:45	00:00:05	95	1.58333	26.09	26.1069	39.57	20.0104	124.854	26.1932	26.5717	200								13.7535	110.854	18.2752	-18.562		0.00903676	0.25691	0.0142569	0		0.0340649	0.182733	0.0259733	0.0458288
2015-07-14	12:25:50	00:00:05	95.0833	1.58472	26.09	26.1068	39.64	21.0052	123.657	28.3752	20.5795	200								14.7483	109.657	20.4572	-24.5542		0.0101079	0.252475	0.0170843	0		0.0339072	0.18336	0.0258758	0.0457093
2015-07-14	12:25:55	00:00:05	95.1667	1.58611	26.09	26.1067	39.92	25.6775	122.485	28.1494	49.9054	200								19.4206	108.485	20.2314	4.77171		0.0157171	0.24816	0.0167828	0.00165422		0.0337793	0.183992	0.0257857	0.0454782
2015-07-14	12:26:00	00:00:05	95.25	1.5875	26.09	26.1065	40.03	27.8748	113.501	19.4336	46.7743	200								21.6179	99.501	11.5156	1.64061		0.0186655	0.21603	0.00679678	0.000298447		0.0336541	0.184489	0.0256098	0.0451966
2015-07-14	12:26:05	00:00:05	95.3333	1.58889	26.09	26.1065	40.18	31.2683	114.575	24.9817	53.2776	200								25.0114	100.575	17.0637	8.14391		0.0235837	0.219783	0.0127716	0.0038992		0.0335526	0.185002	0.0254115	0.0449197
2015-07-14	12:26:10	00:00:05	95.4167	1.59028	26.09	26.1063	40.12	29.8523	109.277	31.2988	48.6603	200								23.5954	95.277	23.3808	3.52661		0.021479	0.20151	0.0211665	0.0010185		0.0334548	0.185439	0.0253059	0.0443031
2015-07-14	12:26:15	00:00:05	95.5	1.59167	26.09	26.1062	40.32	34.9274	116.772	31.2988	28.8513	200								28.6705	102.772	23.3808	-16.2824		0.0293579	0.227534	0.0211665	0		0.0333867	0.186032	0.0251553	0.0440498
2015-07-14	12:26:20	00:00:05	95.5833	1.59306	26.09	26.1061	40.21	32.0099	102.295	24.0265	42.1906	200								25.753	88.295	16.1085	-2.94309		0.0247153	0.178353	0.0116444	0		0.0333023	0.186365	0.0249732	0.0437868
2015-07-14	12:26:25	00:00:05	95.6667	1.59444	26.09	26.106	40.41	37.5671	116.772	41.0889	39.1937	200								31.3102	102.772	33.1709	-5.93999		0.0338126	0.227534	0.0370932	0		0.0332403	0.186881	0.0249979	0.0433647
2015-07-14	12:26:30	00:00:05	95.75	1.59583	26.09	26.1058	40.34	35.4919	115.674	24.0265	35.9406	200								29.235	101.674	16.1085	-9.19309		0.0302905	0.223647	0.0116444	0		0.033143	0.18741	0.0249143	0.0429333
2015-07-14	12:26:35	00:00:05	95.8333	1.59722	26.09	26.1057	40.39	36.9629	110.303	27.0386	43.7103	200								30.706	96.303	19.1206	-1.42339		0.0327721	0.205002	0.0153295	0		0.0330861	0.18784	0.024763	0.0422873
2015-07-14	12:26:40	00:00:05	95.9167	1.59861	26.09	26.1056	40.45	38.8245	114.575	15.2283	51.7487	200								32.5676	100.575	7.3103	6.61501		0.036017	0.219783	0.00327907	0.00279338		0.0330458	0.1884	0.0244875	0.0417876
2015-07-14	12:26:45	00:00:05	96	1.6	26.09	26.1055	40.49	40.1367	109.277	32.3547	52.3163	200								33.8798	95.277	24.4367	7.18261		0.0383728	0.20151	0.0227206	0.00318769		0.0330153	0.188908	0.0242377	0.0411801
2015-07-14	12:26:50	00:00:05	96.0833	1.60139	26.09	26.1053	40.4	37.262	113.501	42.1875	28.1906	200								31.0051	99.501	34.2695	-16.9431		0.0332857	0.21603	0.0390833	0		0.0329726	0.189275	0.0242486	0.040317
2015-07-14	12:26:55	00:00:05	96.1667	1.60278	26.09	26.1052	40.46	39.1479	111.353	21.0968	42.7917	200								32.891	97.353	13.1788	-2.34199		0.0365923	0.208599	0.00843879	0		0.032952	0.189788	0.0241122	0.0394618
2015-07-14	12:27:00	00:00:05	96.25	1.60417	26.09	26.1051	40.51	40.8081	103.271	18.1915	41.0187	200								34.5512	89.271	10.2735	-4.11499		0.0395999	0.181526	0.00565973	0		0.0329355	0.190012	0.0239916	0.0385054
2015-07-14	12:27:05	00:00:05	96.3333	1.60556	26.09	26.105	40.73	49.2798	99.4629	18.4601	51.5594	200								43.0229	85.4629	10.5421	6.42571		0.0562928	0.169266	0.00589895	0.00266627		0.0329827	0.190403	0.0239109	0.0377967
2015-07-14	12:27:10	00:00:05	96.4167	1.60694	26.09	26.1048	40.6	44.0308	106.226	14.8102	29.5319	200								37.7739	92.226	6.8922	-15.6018		0.0456893	0.19126	0.00298349	0		0.0329857	0.190719	0.0238105	0.0373166
2015-07-14	12:27:15	00:00:05	96.5	1.60833	26.09	26.1047	40.69	47.583	109.277	13.6429	49.5453	200								41.3261	95.277	5.7249	4.41161		0.0527743	0.20151	0.00221543	0.00145859		0.0330182	0.191135	0.0236805	0.0370398
2015-07-14	12:27:20	00:00:05	96.5833	1.60972	26.09	26.1046	40.65	45.9595	97.6318	13.9236	40.448	200								39.7026	83.6318	6.0056	-4.68569		0.0494885	0.163487	0.00239223	0		0.0330182	0.191447	0.0235218	0.0369716
2015-07-14	12:27:25	00:00:05	96.6667	1.61111	26.09	26.1045	40.66	46.3623	98.5352	21.4172	40.0238	200								40.1054	84.5352	13.4992	-5.10989		0.0502963	0.166329	0.00877028	0		0.0330148	0.191616	0.0234567	0.0368994
2015-07-14	12:27:30	00:00:05	96.75	1.6125	26.09	26.1044	40.74	49.7131	100.403	17.9291	57.1228	200								43.4562	86.403	10.0111	11.9891		0.057205	0.172263	0.00542965	0.00725059		0.0330186	0.191782	0.023268	0.0367338
2015-07-14	12:27:35	00:00:05	96.8333	1.61389	26.09	26.1043	40.62	44.7937	99.4629	22.0764	42.1906	200								38.5368	85.4629	14.1584	-2.94309		0.0471784	0.169266	0.0094673	0		0.0329953	0.192055	0.0231555	0.0367001
2015-07-14	12:27:40	00:00:05	96.9167	1.61528	26.09	26.1041	40.66	46.3623	91.4917	17.5446	50.4517	200								40.1054	77.4917	9.6266	5.31801		0.0502963	0.144665	0.00509906	0.00196834		0.0329953	0.192344	0.0229338	0.0364421
2015-07-14	12:27:45	00:00:05	97	1.61667	26.09	26.104	40.7	47.998	91.4917	19.87	44.6533	200								41.7411	77.4917	11.952	-0.480391		0.053627	0.144665	0.00721463	0		0.0330092	0.192558	0.0228675	0.0363457
2015-07-14	12:27:50	00:00:05	97.0833	1.61806	26.09	26.1039	40.74	49.7131	91.4917	15.77	46.4417	200								43.4562	77.4917	7.852	1.30801		0.057205	0.144665	0.00367746	0.000207512		0.033051	0.192786	0.0228064	0.0360568
2015-07-14	12:27:55	00:00:05	97.1667	1.61944	26.09	26.1038	40.64	45.5688	81.9824	19.4336	41.5985	200								39.3119	67.9824	11.5156	-3.53519		0.0487097	0.117264	0.00679678	0		0.0330753	0.192819	0.0227198	0.0358637
2015-07-14	12:28:00	00:00:05	97.25	1.62083	26.09	26.1037	40.59	43.6584	84.2407	22.2473	48.8373	200								37.4015	70.2407	14.3293	3.70361		0.0449689	0.123574	0.00965126	0.00110173		0.0330463	0.192886	0.0225885	0.0355308
2015-07-14	12:28:05	00:00:05	97.3333	1.62222	26.09	26.1036	40.63	45.1782	88.1836	26.1932	39.0564	200								38.9213	74.1836	18.2752	-6.07729		0.0479357	0.134888	0.0142569	0		0.0330526	0.193009	0.0225532	0.0351268
2015-07-14	12:28:10	00:00:05	97.4167	1.62361	26.09	26.1035	40.57	42.9199	80.5054	14.5081	65.2924	200								36.663	66.5054	6.5901	20.1587		0.0435532	0.113204	0.00277653	0.0166862		0.0330406	0.193041	0.0224372	0.0343885
2015-07-14	12:28:15	00:00:05	97.5	1.625	26.09	26.1034	40.57	42.9199	80.5054	16.3361	28.3783	200								36.663	66.5054	8.4181	-16.7554		0.0435532	0.113204	0.0041119	0		0.0330057	0.193095	0.0221387	0.0340105
2015-07-14	12:28:20	00:00:05	97.5833	1.62639	26.09	26.1033	40.58	43.2861	70.3979	24.7864	41.5985	200								37.0292	56.3979	16.8684	-3.53519		0.0442531	0.0869011	0.0125379	0		0.0329593	0.19296	0.0220678	0.0333449
2015-07-14	12:28:25	00:00:05	97.6667	1.62778	26.09	26.1031	40.62	44.7937	76.9531	19.1498	57.1228	200								38.5368	62.9531	11.2318	11.9891		0.0471784	0.103663	0.0065301	0.00725059		0.0328615	0.193125	0.0219234	0.032327
2015-07-14	12:28:30	00:00:05	97.75	1.62917	26.09	26.103	40.63	45.1782	74.9146	13.9236	41.748	200								38.9213	60.9146	6.0056	-3.38569		0.0479357	0.0983314	0.00239223	0		0.0328377	0.193298	0.0218185	0.0315786
2015-07-14	12:28:35	00:00:05	97.8333	1.63056	26.09	26.1029	40.53	41.4978	79.7852	23.4741	46.9421	200								35.2409	65.7852	15.5561	1.80841		0.0408754	0.111244	0.0110105	0.000348902		0.0327578	0.193359	0.0218193	0.0308462
2015-07-14	12:28:40	00:00:05	97.9167	1.63194	26.09	26.1028	40.58	43.2861	81.9824	32.0862	45.9442	200								37.0292	67.9824	24.1682	0.810509		0.0442531	0.117264	0.0223215	9.63046e-05		0.0327077	0.193384	0.0218437	0.0294289
2015-07-14	12:28:45	00:00:05	98	1.63333	26.09	26.1026	40.53	41.4978	77.6489	26.4038	47.4487	200								35.2409	63.6489	18.4858	2.31501		0.0408754	0.105507	0.0145214	0.000518492		0.0326237	0.193344	0.0218206	0.0286827
2015-07-14	12:28:50	00:00:05	98.0833	1.63472	26.09	26.1025	40.58	43.2861	74.2554	32.3547	47.11	200								37.0292	60.2554	24.4367	1.97631		0.0442531	0.0966302	0.0227206	0.0004023		0.0325411	0.193315	0.021862	0.0282804
2015-07-14	12:28:55	00:00:05	98.1667	1.63611	26.09	26.1025	40.5	40.4663	71.0205	29.5502	47.11	200								34.2094	57.0205	21.6322	1.97631		0.0389734	0.088445	0.0186853	0.0004023		0.0324232	0.193315	0.0218857	0.0276916
2015-07-14	12:29:00	00:00:05	98.25	1.6375	26.09	26.1024	40.61	44.4092	61.2366	21.579	32.4432	200								38.1523	47.2366	13.661	-12.6905		0.0464256	0.0653946	0.0089395	0		0.0323363	0.19317	0.0218331	0.0269648
2015-07-14	12:29:05	00:00:05	98.3333	1.63889	26.09	26.1023	40.55	42.2058	64.4958	35.1868	36.6913	200								35.9489	50.4958	27.2688	-8.44239		0.0422006	0.0727815	0.0270899	0		0.0322177	0.19313	0.0218351	0.0262094
2015-07-14	12:29:10	00:00:05	98.4167	1.64028	26.09	26.1022	40.42	37.8784	71.6553	16.9281	34.3735	200								31.6215	57.6553	9.0101	-10.7602		0.0343535	0.0900296	0.00458549	0		0.0320565	0.193162	0.0217126	0.0251126
2015-07-14	12:29:15	00:00:05	98.5	1.64167	26.08	26.1021	40.43	38.1897	62.8418	20.1691	31.1554	200								31.9328	48.8418	12.2511	-13.9783		0.0348975	0.0689956	0.00750641	0		0.0318926	0.193067	0.0216249	0.0238804
2015-07-14	12:29:20	00:00:05	98.5833	1.64306	26.09	26.102	40.46	39.1479	56.2317	31.5552	35.6934	200								32.891	42.2317	23.6372	-9.44029		0.0365923	0.0546416	0.0215401	0		0.0317738	0.192963	0.0216541	0.0231949
2015-07-14	12:29:25	00:00:05	98.6667	1.64444	26.09	26.1019	40.41	37.5671	71.0205	26.4038	46.4417	200								31.3102	57.0205	18.4858	1.30801		0.0338126	0.088445	0.0145214	0.000207512		0.0316388	0.193055	0.0216604	0.0227783
2015-07-14	12:29:30	00:00:05	98.75	1.64583	26.09	26.1018	40.39	36.9629	56.2317	23.114	31.2607	200								30.706	42.2317	15.196	-13.873		0.0327721	0.0546416	0.0106046	0		0.0315127	0.193038	0.0214895	0.0224169
2015-07-14	12:29:35	00:00:05	98.8333	1.64722	26.09	26.1018	40.37	36.3647	55.2917	36.4075	46.7743	200								30.1078	41.2917	28.4895	1.64061		0.0317541	0.0527039	0.0290612	0.000298447		0.0313865	0.192914	0.0215522	0.0219867
2015-07-14	12:29:40	00:00:05	98.9167	1.64861	26.09	26.1017	40.34	35.4919	66.1987	36.4075	42.7917	200								29.235	52.1987	28.4895	-2.34199		0.0302905	0.0767583	0.0290612	0		0.0312625	0.192975	0.0216139	0.0216493
2015-07-14	12:29:45	00:00:05	99	1.65	26.09	26.1016	40.35	35.7788	59.6802	24.4019	57.3303	200								29.5219	45.6802	16.4839	12.1966		0.0307688	0.0619731	0.0120827	0.00745293		0.0311104	0.192975	0.0215761	0.0211473
2015-07-14	12:29:50	00:00:05	99.0833	1.65139	26.09	26.1015	40.43	38.1897	53.4668	25.3784	36.5662	200								31.9328	39.4668	17.4604	-8.56749		0.0348975	0.049018	0.0132512	0		0.0309565	0.192892	0.0214536	0.0205265
2015-07-14	12:29:55	00:00:05	99.1667	1.65278	26.09	26.1014	40.34	35.4919	50.4456	45.7031	47.9645	200								29.235	36.4456	37.7851	2.83081		0.0302905	0.0431398	0.0457111	0.000715919		0.0307977	0.192734	0.0215494	0.0201343
2015-07-14	12:30:00	00:00:05	99.25	1.65417	26.09	26.1013	40.36	36.0718	46.4844	49.5728	46.109	200								29.8149	32.4844	41.6548	0.975309		0.0312601	0.0358695	0.0534493	0.000129594		0.0306857	0.19269	0.0217245	0.0199848
2015-07-14	12:30:05	00:00:05	99.3333	1.65556	26.09	26.1013	40.33	35.2112	50.0366	44.4946	45.2942	199.944								28.9543	36.0366	36.5766	0.160509		0.0298254	0.0423659	0.0433888	7.17168e-06		0.0305107	0.192697	0.0218414	0.0197943
2015-07-14	12:30:10	00:00:05	99.4167	1.65694	26.09	26.1012	40.34	35.4919	50.8667	25.7813	37.5916	199.889								29.235	36.8667	17.8633	-7.54209		0.0302905	0.0439421	0.013745	0		0.0303472	0.192571	0.0218382	0.0197206
2015-07-14	12:30:15	00:00:05	99.5	1.65833	26.09	26.1011	40.31	34.6497	42.9016	30.7861	43.2495	199.833								28.3928	28.9016	22.8681	-1.88419		0.0289031	0.0297384	0.020427	0		0.0301633	0.192483	0.0218748	0.0196762
2015-07-14	12:30:20	00:00:05	99.5833	1.65972	26.09	26.101	40.31	34.6497	38.739	32.8979	43.5547	199.778								28.3928	24.739	24.9799	-1.57899		0.0289031	0.0231731	0.0235361	0		0.0300294	0.19243	0.0218862	0.0196532
2015-07-14	12:30:25	00:00:05	99.6667	1.66111	26.09	26.1009	40.26	33.2947	41.5649	22.937	51.001	199.722								27.0378	27.5649	15.019	5.86731		0.0267227	0.0275633	0.0104071	0.00230449		0.0298738	0.192381	0.0218712	0.0195433
2015-07-14	12:30:30	00:00:05	99.75	1.6625	26.09	26.1008	40.42	37.8784	36.7065	29.0741	42.3401	199.667								31.6215	22.7065	21.1561	-2.79359		0.0343535	0.0201959	0.0180301	0		0.0298006	0.192178	0.0218096	0.0193604
2015-07-14	12:30:35	00:00:05	99.8333	1.66389	26.09	26.1008	40.36	36.0718	38.147	32.0862	47.9645	199.611								29.8149	24.147	24.1682	2.83081		0.0312601	0.0222901	0.0223215	0.000715919		0.0296807	0.192135	0.0217857	0.0192322
2015-07-14	12:30:40	00:00:05	99.9167	1.66528	26.08	26.1006	40.27	33.5632	39.9658	43.3228	41.5985	199.556								27.3063	25.9658	35.4048	-3.53519		0.0271496	0.0250438	0.0411808	0		0.0295515	0.192011	0.0218659	0.0191755
2015-07-14	12:30:45	00:00:05	100	1.66667	26.08	26.1005	40.24	32.7759	30.2307	37.0361	50.8179	199.5								26.519	16.2307	29.1181	5.68421		0.025905	0.0117864	0.0300966	0.00219023		0.0293791	0.191816	0.021954	0.0191391
2015-07-14	12:30:50	00:00:05	100.083	1.66806	26.09	26.1004	40.31	34.6497	43.2434	24.0265	42.7917	199.444								28.3928	29.2434	16.1085	-2.34199		0.0289031	0.0303046	0.0116444	0		0.0292534	0.191836	0.0219493	0.0191189
2015-07-14	12:30:55	00:00:05	100.167	1.66944	26.09	26.1003	40.19	31.5125	39.0381	34.5947	48.1384	199.389								25.2556	25.0381	26.6767	3.00471		0.0239541	0.0236241	0.0261526	0.000787761		0.0290862	0.191689	0.0220166	0.0191201
2015-07-14	12:31:00	00:00:05	100.25	1.67083	26.09	26.1003	40.23	32.5195	34.2834	39.6851	50.0854	199.333								26.2626	20.2834	31.7671	4.95171		0.0255045	0.0168521	0.0346076	0.00175544		0.0289726	0.191657	0.0220537	0.0191192
2015-07-14	12:31:05	00:00:05	100.333	1.67222	26.09	26.1002	40.31	34.6497	31.8237	48.2422	40.448	199.278								28.3928	17.8237	40.3242	-4.68569		0.0289031	0.0136962	0.0507372	0		0.0288428	0.191411	0.0221844	0.0190768
2015-07-14	12:31:10	00:00:05	100.417	1.67361	26.09	26.1001	40.79	51.9653	22.0917	57.4768	29.0436	199.222								45.7084	8.0917	49.5588	-16.0901		0.0620344	0.00385918	0.0706274	0		0.0289016	0.191353	0.0223678	0.0190224
2015-07-14	12:31:15	00:00:05	100.5	1.675	26.09	26.1	41.01	63.5132	25.4883	52.3804	46.4417	199.167								57.2563	11.4883	44.4624	1.30801		0.0890323	0.00677095	0.0593444	0.000207512		0.0290562	0.191127	0.0224852	0.019016
2015-07-14	12:31:20	00:00:05	100.583	1.67639	26.09	26.0999	40.96	60.6323	24.6216	46.1182	57.3303	199.111								54.3754	10.6216	38.2002	12.1966		0.0819567	0.00597046	0.0465192	0.00745293		0.0291706	0.190951	0.0224639	0.018972
2015-07-14	12:31:25	00:00:05	100.667	1.67778	26.08	26.0998	40.91	57.9041	39.6545	30.7861	56.9092	199.056								51.6472	25.6545	22.8681	11.7755		0.0754616	0.0245639	0.020427	0.00704451		0.029282	0.190937	0.0223263	0.018962
2015-07-14	12:31:30	00:00:05	100.75	1.67917	26.08	26.0997	40.87	55.835	38.739	36.4075	63.1348	199								49.5781	24.739	28.4895	18.0011		0.0706714	0.0231731	0.0290612	0.0139155		0.0293263	0.190875	0.0223106	0.0190099
2015-07-14	12:31:35	00:00:05	100.833	1.68056	26.08	26.0995	40.72	48.8464	31.3599	42.1875	43.0939	198.944								42.5895	17.3599	34.2695	-2.03979		0.055386	0.013129	0.0390833	0		0.0293475	0.190857	0.0224096	0.0190066
2015-07-14	12:31:40	00:00:05	100.917	1.68194	26.08	26.0994	40.65	45.9595	31.1279	39.0015	53.0823	198.889								39.7026	17.1279	31.0835	7.94861		0.0494885	0.0128487	0.0334208	0.0037503		0.0293153	0.190839	0.0223182	0.0190013
2015-07-14	12:31:45	00:00:05	101	1.68333	26.08	26.0993	40.56	42.5598	35.8765	40.7349	40.1642	198.833								36.3029	21.8765	32.8169	-4.96949		0.0428691	0.019025	0.0364603	0		0.0292355	0.190782	0.0222355	0.018972
2015-07-14	12:31:50	00:00:05	101.083	1.68472	26.09	26.0992	40.57	42.9199	30.2307	41.8213	34.3735	198.778								36.663	16.2307	33.9033	-10.7602		0.0435532	0.0117864	0.0384156	0		0.0291543	0.190568	0.0223231	0.018972
2015-07-14	12:31:55	00:00:05	101.167	1.68611	26.08	26.0991	40.65	45.9595	32.5378	60.8276	41.0187	198.722								39.7026	18.5378	52.9096	-4.11499		0.0494885	0.014587	0.078442	0		0.029066	0.190428	0.0224812	0.0189624
2015-07-14	12:32:00	00:00:05	101.25	1.6875	26.09	26.099	40.49	40.1367	24.4537	52.3804	44.812	198.667								33.8798	10.4537	44.4624	-0.321691		0.0383728	0.0058198	0.0593444	0		0.0289063	0.190297	0.0225917	0.01892
2015-07-14	12:32:05	00:00:05	101.333	1.68889	26.09	26.0989	40.53	41.4978	25.1373	50.0305	41.748	198.611								35.2409	11.1373	42.1125	-3.38569		0.0408754	0.0064422	0.0543944	0		0.0287916	0.190247	0.0226885	0.0188491
2015-07-14	12:32:10	00:00:05	101.417	1.69028	26.09	26.0988	40.45	38.8245	32.5378	46.1182	47.11	198.556								32.5676	18.5378	38.2002	1.97631		0.036017	0.014587	0.0465192	0.0004023		0.0286424	0.190134	0.0227455	0.0188426
2015-07-14	12:32:15	00:00:05	101.5	1.69167	26.09	26.0988	40.4	37.262	28.3325	61.4014	52.3163	198.5								31.0051	14.3325	53.4834	7.18261		0.0332857	0.00965472	0.079811	0.00318769		0.0285007	0.189959	0.0228774	0.0188502
2015-07-14	12:32:20	00:00:05	101.583	1.69306	26.09	26.0987	40.42	37.8784	28.949	52.3804	59.7107	198.444								31.6215	14.949	44.4624	14.577		0.0343535	0.0103294	0.0593444	0.00992027		0.0283494	0.189819	0.0230934	0.0188905
2015-07-14	12:32:25	00:00:05	101.667	1.69444	26.09	26.0986	40.44	38.5071	37.2742	53.8452	52.89	198.389								32.2502	23.2742	45.9272	7.75631		0.0354556	0.021012	0.0625114	0.00360584		0.0282168	0.189629	0.0232864	0.0188839
2015-07-14	12:32:30	00:00:05	101.75	1.69583	26.08	26.0985	40.41	37.5671	20.9503	44.8914	53.2776	198.333								31.3102	6.9503	36.9734	8.14391		0.0338126	0.00302394	0.0441463	0.0038992		0.0281074	0.189349	0.0234121	0.0188995
2015-07-14	12:32:35	00:00:05	101.833	1.69722	26.08	26.0983	40.37	36.3647	38.147	54.3457	55.6702	198.278								30.1078	24.147	46.4277	10.5365		0.0317541	0.0222901	0.0636077	0.00589393		0.0280335	0.189258	0.0235084	0.018924
2015-07-14	12:32:40	00:00:05	101.917	1.69861	26.07	26.0982	40.38	36.6638	22.8455	44.8914	54.0619	198.222								30.4069	8.8455	36.9734	8.92821		0.0322616	0.00445187	0.0441463	0.00451882		0.0279445	0.189173	0.0235926	0.0189015
2015-07-14	12:32:45	00:00:05	102	1.7	26.08	26.098	40.44	38.5071	27.9297	40.7349	56.7017	198.167								32.2502	13.9297	32.8169	11.568		0.0354556	0.00922321	0.0364603	0.00684646		0.027838	0.188829	0.0236594	0.01893
2015-07-14	12:32:50	00:00:05	102.083	1.70139	26.09	26.098	40.42	37.8784	48.8159	40.3809	62.8967	198.111								31.6215	34.8159	32.4629	17.763		0.0343535	0.0400877	0.0358315	0.0136215		0.0277749	0.188665	0.0237189	0.0189868
2015-07-14	12:32:55	00:00:05	102.167	1.70278	26.09	26.0979	40.43	38.1897	25.4883	42.9443	71.4661	198.056								31.9328	11.4883	35.0263	26.3324		0.0348975	0.00677095	0.0404769	0.0256133		0.027666	0.188507	0.0237962	0.0190899
2015-07-14	12:33:00	00:00:05	102.25	1.70417	26.08	26.0978	40.23	32.5195	18.7668	54.8584	53.0823	198								26.2626	4.7668	46.9404	7.94861		0.0255045	0.00165149	0.0647382	0.0037503		0.0275339	0.187931	0.0239922	0.0191023
2015-07-14	12:33:05	00:00:05	102.333	1.70556	26.08	26.0976	40.34	35.4919	26.2085	62.5854	73.3887	197.944								29.235	12.2085	54.6674	28.255		0.0302905	0.00746458	0.0826639	0.0286785		0.027414	0.187482	0.0242559	0.0190866
2015-07-14	12:33:10	00:00:05	102.417	1.70694	26.08	26.0975	40.28	33.8318	20.0134	65.0269	68.3014	197.889								27.5749	6.0134	57.1089	23.1677		0.0275793	0.00239722	0.088665	0.020858		0.0272827	0.187215	0.0244507	0.0191379
2015-07-14	12:33:15	00:00:05	102.5	1.70833	26.08	26.0974	40.24	32.7759	23.0011	74.4873	76.2329	197.833								26.519	9.0011	66.5693	31.0992		0.025905	0.00457814	0.113379	0.0334479		0.0271363	0.186885	0.0248365	0.0192773
2015-07-14	12:33:20	00:00:05	102.583	1.70972	26.08	26.0973	40.25	33.0322	20.813	65.6494	87.8601	197.778								26.7753	6.813	57.7314	42.7264		0.0263078	0.00292869	0.0902203	0.0556719		0.0269917	0.186441	0.0250253	0.0195043
2015-07-14	12:33:25	00:00:05	102.667	1.71111	26.08	26.0971	40.1	29.3945	20.5414	58.5693	73.3887	197.722								23.1376	6.5414	50.6513	28.255		0.0208145	0.00274369	0.0731413	0.0286785		0.0268654	0.185989	0.0252046	0.0196238
2015-07-14	12:33:30	00:00:05	102.75	1.7125	26.08	26.097	40.04	28.0823	15.3015	63.7817	89.5752	197.667								21.8254	1.3015	55.8637	44.4415		0.0189537	0.000205858	0.0855845	0.0592997		0.0267315	0.185484	0.0253674	0.0198682
2015-07-14	12:33:35	00:00:05	102.833	1.71389	26.09	26.0969	40.12	29.8523	11.6669	63.7817	94.9463	197.611								23.5954	-2.3331	55.8637	49.8126		0.021479	0	0.0855845	0.0712084		0.0266011	0.185082	0.0255198	0.020094
2015-07-14	12:33:40	00:00:05	102.917	1.71528	26.09	26.0968	40.17	31.0272	17.7277	65.6494	86.853	197.556								24.7703	3.7277	57.7314	41.7193		0.0232201	0.00111324	0.0902203	0.0535821		0.0264949	0.184571	0.0257681	0.0202799
2015-07-14	12:33:45	00:00:05	103	1.71667	26.09	26.0968	40.17	31.0272	29.1565	69.5679	104.694	197.5								24.7703	15.1565	61.6499	59.5603		0.0232201	0.0105604	0.100242	0.0948484		0.0263682	0.184063	0.0260806	0.0206677
2015-07-14	12:33:50	00:00:05	103.083	1.71806	26.09	26.0967	40.06	28.5126	20.4086	79.0405	100.671	197.444								22.2557	6.4086	71.1225	55.5373		0.0195566	0.0026549	0.126072	0.0847839		0.0262035	0.183541	0.026443	0.021021
2015-07-14	12:33:55	00:00:05	103.167	1.71944	26.08	26.0965	40.14	30.3162	17.2913	57.4768	114.618	197.389								24.0593	3.2913	49.5588	69.4843		0.0221603	0.00091171	0.0706274	0.121447		0.0260496	0.182973	0.026641	0.0215143
2015-07-14	12:34:00	00:00:05	103.25	1.72083	26.08	26.0964	40.06	28.5126	20.2759	55.3711	114.166	197.333								22.2557	6.2759	47.4531	69.0323		0.0195566	0.00256727	0.0658761	0.120182		0.025904	0.182459	0.0267347	0.0220151
2015-07-14	12:34:05	00:00:05	103.333	1.72222	26.08	26.0963	39.89	25.116	23.6328	53.3508	100.671	197.278								18.8591	9.6328	45.4328	55.5373		0.0149946	0.00510433	0.0614356	0.0847839		0.0257761	0.181888	0.026849	0.0223346
2015-07-14	12:34:10	00:00:05	103.417	1.72361	26.08	26.0962	39.85	24.3927	12.9105	60.8276	118.768	197.222								18.1358	-1.0895	52.9096	73.6343		0.0140829	0	0.078442	0.13329		0.025659	0.181158	0.026995	0.02289
2015-07-14	12:34:15	00:00:05	103.5	1.725	26.08	26.096	39.93	25.8667	21.9452	65.0269	111.493	197.167								19.6098	7.9452	57.1089	66.3593		0.0159634	0.00374772	0.088665	0.112805		0.0255524	0.180516	0.0270544	0.0233479
2015-07-14	12:34:20	00:00:05	103.583	1.72639	26.08	26.0959	39.79	23.3582	14.4165	50.0305	112.817	197.111								17.1013	0.4165	42.1125	67.6833		0.0128167	3.31026e-05	0.0543944	0.116437		0.0254557	0.179835	0.0271291	0.0237956
2015-07-14	12:34:25	00:00:05	103.667	1.72778	26.08	26.0958	39.89	25.116	26.5808	46.1182	96.814	197.056								18.8591	12.5808	38.2002	51.6803		0.0149946	0.00783306	0.0465192	0.0755393		0.0253583	0.179111	0.0271684	0.0240524
2015-07-14	12:34:30	00:00:05	103.75	1.72917	26.08	26.0957	39.74	22.5372	8.41217	52.3804	108.459	197								16.2803	-5.58783	44.4624	63.3253		0.0118442	0	0.0593444	0.104648		0.0252552	0.178393	0.0272664	0.0244827
2015-07-14	12:34:35	00:00:05	103.833	1.73056	26.08	26.0955	39.76	22.8607	31.5918	42.1875	123.083	196.944								16.6038	17.5918	34.2695	77.9493		0.0122239	0.0134115	0.0390833	0.146038		0.0251779	0.177756	0.0272576	0.0250773
2015-07-14	12:34:40	00:00:05	103.917	1.73194	26.09	26.0955	39.8	23.526	16.0599	55.8838	135.962	196.889								17.2691	2.0599	47.9658	90.8283		0.013019	0.000429941	0.0670214	0.186632		0.0250999	0.176975	0.0273952	0.0258526
2015-07-14	12:34:45	00:00:05	104	1.73333	26.08	26.0953	39.85	24.3927	23.3124	52.8564	153.931	196.833								18.1358	9.3124	44.9384	108.797		0.0140829	0.00483475	0.0603668	0.249307		0.0249827	0.176212	0.0273626	0.0268903
2015-07-14	12:34:50	00:00:05	104.083	1.73472	26.08	26.0952	39.76	22.8607	37.2742	50.4883	131.165	196.778								16.6038	23.2742	42.5703	86.0313		0.0122239	0.021012	0.055346	0.171076		0.0249205	0.175445	0.0274124	0.0275849
2015-07-14	12:34:55	00:00:05	104.167	1.73611	26.08	26.0951	39.7	21.9086	18.6478	46.9482	164.819	196.722								15.6517	4.6478	39.0302	119.685		0.0111192	0.00158586	0.0481511	0.290521		0.0248623	0.17487	0.0274611	0.0287521
2015-07-14	12:35:00	00:00:05	104.25	1.7375	26.08	26.095	39.72	22.2198	18.2953	55.8838	158.96	196.667								15.9629	4.2953	47.9658	113.826		0.011476	0.0013974	0.0670214	0.268048		0.0248055	0.174079	0.0275564	0.0298494
2015-07-14	12:35:05	00:00:05	104.333	1.73889	26.08	26.0948	39.67	21.4508	18.7668	48.2422	186.768	196.611								15.1939	4.7668	40.3242	141.634		0.0106022	0.00165149	0.0507372	0.380604		0.0247194	0.173275	0.0275451	0.0314144
2015-07-14	12:35:10	00:00:05	104.417	1.74028	26.08	26.0947	39.57	20.0104	20.813	37.0361	183.032	196.556								13.7535	6.813	29.1181	137.898		0.00903676	0.00292869	0.0300966	0.36463		0.0246385	0.172418	0.0274516	0.0329336
2015-07-14	12:35:15	00:00:05	104.5	1.74167	26.08	26.0946	39.45	18.4418	15.3015	37.3535	181.555	196.5								12.1849	1.3015	29.4355	136.421		0.00744142	0.000205858	0.0306245	0.358385		0.0245491	0.171738	0.0273446	0.034406
2015-07-14	12:35:20	00:00:05	104.583	1.74306	26.08	26.0945	39.37	17.4835	20.813	36.4075	169.531	196.444								11.2266	6.813	28.4895	124.397		0.00652523	0.00292869	0.0290612	0.309084		0.0244308	0.170818	0.0273215	0.0356505
2015-07-14	12:35:25	00:00:05	104.667	1.74444	26.08	26.0943	39.46	18.5669	15.9622	37.677	198.438	196.389								12.31	1.9622	29.759	153.304		0.00756435	0.000397704	0.0311661	0.432144		0.024351	0.169935	0.0272856	0.0374174
2015-07-14	12:35:30	00:00:05	104.75	1.74583	26.08	26.0942	39.47	18.692	22.6929	47.8088	144.946	196.333								12.4351	8.6929	39.8908	99.8123		0.00768803	0.00432932	0.0498654	0.217115		0.0242699	0.169021	0.0273466	0.0383104
2015-07-14	12:35:35	00:00:05	104.833	1.74722	26.08	26.0941	39.34	17.1387	26.0284	44.4946	138.708	196.278								10.8818	12.0284	36.5766	93.5743		0.00620677	0.00728874	0.0433888	0.195765		0.0241975	0.168151	0.0273781	0.0390211
2015-07-14	12:35:40	00:00:05	104.917	1.74861	26.08	26.094	39.53	19.4702	21.5118	38.3301	189.038	196.222								13.2133	7.5118	30.4121	143.904		0.00847422	0.00342525	0.0322705	0.390436		0.0241419	0.167218	0.027358	0.0405875
2015-07-14	12:35:45	00:00:05	105	1.75	26.07	26.0938	38.91	13.0508	21.228	49.5728	192.896	196.167								6.79387	7.228	41.6548	147.762		0.00291552	0.00322006	0.0534493	0.407361		0.0240318	0.166488	0.0274121	0.0422069
2015-07-14	12:35:50	00:00:05	105.083	1.75139	26.07	26.0936	39.16	15.2527	22.8455	50.9521	154.541	196.111								8.99577	8.8455	43.0341	109.407		0.0045738	0.00445187	0.0563164	0.251553		0.0239031	0.165525	0.0273626	0.0432536
2015-07-14	12:35:55	00:00:05	105.167	1.75278	26.08	26.0935	39.32	16.9159	17.6178	41.0889	120.19	196.056								10.659	3.6178	33.1709	75.0563		0.00600419	0.00106107	0.0370932	0.137442		0.0238185	0.164565	0.0273199	0.0437633
2015-07-14	12:36:00	00:00:05	105.25	1.75417	26.08	26.0934	39.16	15.2527	28.5339	30.0354	106.348	196								8.99577	14.5339	22.1174	61.2143		0.0045738	0.00987325	0.0193621	0.0991086		0.0237113	0.163624	0.0271779	0.0441656
2015-07-14	12:36:05	00:00:05	105.333	1.75556	26.07	26.0932	39.18	15.448	21.6553	38.6597	106.348	195.944								9.19107	7.6553	30.7417	61.2143		0.00473411	0.00353081	0.0328333	0.0991086		0.0236457	0.162739	0.0271141	0.0445704
2015-07-14	12:36:10	00:00:05	105.417	1.75694	26.08	26.0931	39.39	17.7155	23.4711	71.6309	109.32	195.889								11.4586	9.4711	63.7129	64.1863		0.00674287	0.00496759	0.105677	0.106939		0.0235785	0.161761	0.0274454	0.0448176
2015-07-14	12:36:15	00:00:05	105.5	1.75833	26.08	26.093	39.06	14.3188	24.1211	67.5781	132.214	195.833								8.06187	10.1211	59.6601	87.0803		0.00383639	0.00552566	0.0951035	0.174434		0.0234722	0.160899	0.0276759	0.0454324
2015-07-14	12:36:20	00:00:05	105.583	1.75972	26.08	26.0928	38.99	13.7085	26.9592	64.4043	141.504	195.778								7.45157	12.9592	56.4863	96.3703		0.00338131	0.00821438	0.0871196	0.205232		0.0233518	0.160049	0.0279318	0.0462377
2015-07-14	12:36:25	00:00:05	105.667	1.76111	26.07	26.0927	38.72	11.6432	17.6178	63.1836	147.876	195.722								5.38627	3.6178	55.2656	102.742		0.00200903	0.00106107	0.0841195	0.227429		0.0232379	0.159019	0.0281807	0.0471321
2015-07-14	12:36:30	00:00:05	105.75	1.7625	26.07	26.0925	38.65	11.174	31.1279	68.2373	129.095	195.667								4.91707	17.1279	60.3193	83.9613		0.00173579	0.0128487	0.0967946	0.164521		0.023132	0.158039	0.0284671	0.0477721
2015-07-14	12:36:35	00:00:05	105.833	1.76389	26.08	26.0924	38.83	12.4329	23.6328	71.6309	123.572	195.611								6.17597	9.6328	63.7129	78.4383		0.00250202	0.00510433	0.105677	0.14751		0.0230362	0.157095	0.0288238	0.048325
2015-07-14	12:36:40	00:00:05	105.917	1.76528	26.08	26.0923	38.83	12.4329	39.6545	61.9873	101.862	195.556								6.17597	25.6545	54.0693	56.7283		0.00250202	0.0245639	0.081218	0.0877191		0.0229403	0.156108	0.0290659	0.0486361
2015-07-14	12:36:45	00:00:05	106	1.76667	26.08	26.0921	38.84	12.5076	31.1279	52.8564	133.276	195.5								6.25067	17.1279	44.9384	88.1423		0.00255074	0.0128487	0.0603668	0.177859		0.022836	0.155146	0.029183	0.0492596
2015-07-14	12:36:50	00:00:05	106.083	1.76806	26.08	26.092	38.43	9.84879	36.7065	60.2539	163.489	195.444								3.59186	22.7065	52.3359	118.355		0.00104889	0.0201959	0.0770822	0.28536		0.022729	0.154214	0.0293202	0.0503347
2015-07-14	12:36:55	00:00:05	106.167	1.76944	26.08	26.0919	38.69	11.4395	27.3407	45.7031	133.276	195.389								5.18257	13.3407	37.7851	88.1423		0.00188856	0.00860569	0.0457111	0.177859		0.0226446	0.15316	0.0293134	0.0510527
2015-07-14	12:37:00	00:00:05	106.25	1.77083	26.08	26.0918	38.76	11.9232	32.0587	51.4221	133.276	195.333								5.66627	18.0587	43.5041	88.1423		0.00217915	0.013987	0.0573062	0.177859		0.022544	0.152166	0.0293806	0.0517188
2015-07-14	12:37:05	00:00:05	106.333	1.77222	26.08	26.0916	38.77	11.9934	41.8945	50.0305	107.611	195.278								5.73647	27.8945	42.1125	62.4773		0.00222262	0.0280938	0.0543944	0.102409		0.0224519	0.151302	0.029458	0.0520241
2015-07-14	12:37:10	00:00:05	106.417	1.77361	26.08	26.0915	38.66	11.2396	45.0073	56.9458	87.8601	195.222								4.98267	31.0073	49.0278	42.7264		0.00177308	0.0332895	0.0694175	0.0556719		0.0223407	0.150389	0.0296694	0.0520756
2015-07-14	12:37:15	00:00:05	106.5	1.775	26.08	26.0914	38.35	9.41772	36.1511	52.8564	139.819	195.167								3.16079	22.1511	44.9384	94.6853		0.00085442	0.0194095	0.0603668	0.199506		0.0222239	0.149322	0.0298358	0.0528261
2015-07-14	12:37:20	00:00:05	106.583	1.77639	26.08	26.0913	38.22	8.76617	57.6782	42.1875	79.1992	195.111								2.50924	43.6782	34.2695	34.0655		0.000590018	0.0576745	0.0390833	0.0387108		0.0221382	0.148473	0.0299248	0.052807
2015-07-14	12:37:25	00:00:05	106.667	1.77778	26.08	26.0911	38.24	8.8623	54.8279	46.9482	72.5586	195.056								2.60537	40.8279	39.0302	27.4249		0.000626691	0.0517576	0.0481511	0.0273391		0.0220426	0.147672	0.0300239	0.0527526
2015-07-14	12:37:30	00:00:05	106.75	1.77917	26.08	26.091	38.58	10.7285	56.7139	43.7134	65.7837	195								4.47157	42.7139	35.7954	20.65		0.00149052	0.0556458	0.041912	0.0173433		0.0219302	0.146757	0.0301526	0.0521325
2015-07-14	12:37:35	00:00:05	106.833	1.78056	26.08	26.091	38.79	12.1384	57.1899	49.1272	82.6111	194.944								5.88147	43.1899	41.2092	37.4774		0.00231342	0.0566438	0.0525351	0.0451155		0.0218285	0.145885	0.0302546	0.0521791
2015-07-14	12:37:40	00:00:05	106.917	1.78194	26.08	26.0909	38.51	10.3058	58.1726	45.7031	76.8127	194.889								4.04887	44.1726	37.7851	31.679		0.00127105	0.0587252	0.0457111	0.0344538		0.0217324	0.14529	0.0302546	0.0521974
2015-07-14	12:37:45	00:00:05	107	1.78333	26.08	26.0908	38.55	10.5453	70.3979	39.3372	63.1348	194.833								4.28837	56.3979	31.4192	18.0011		0.00139379	0.0869011	0.0340017	0.0139155		0.0216215	0.14467	0.0302091	0.0519892
2015-07-14	12:37:50	00:00:05	107.083	1.78472	26.08	26.0907	39.01	13.8794	74.2554	39.6851	67.0288	194.778								7.62247	60.2554	31.7671	21.8951		0.00350656	0.0966302	0.0346076	0.0190509		0.0215176	0.144021	0.0302235	0.0517611
2015-07-14	12:37:55	00:00:05	107.167	1.78611	26.08	26.0905	38.92	13.1302	67.3706	53.3508	60.376	194.722								6.87327	53.3706	45.4328	15.2423		0.00297036	0.0795411	0.0614356	0.0106565		0.0214301	0.143498	0.0303928	0.0515328
2015-07-14	12:38:00	00:00:05	107.25	1.7875	26.08	26.0904	39.3	16.6962	79.7852	49.5728	72.5586	194.667								10.4393	65.7852	41.6548	27.4249		0.00580692	0.111244	0.0534493	0.0273391		0.0213545	0.143108	0.0305174	0.0513356
2015-07-14	12:38:05	00:00:05	107.333	1.78889	26.08	26.0903	39.27	16.3727	81.2378	59.1187	118.768	194.611								10.1158	67.2378	51.2007	73.6343		0.005521	0.11521	0.074418	0.13329		0.0212745	0.142536	0.0307753	0.0518086
2015-07-14	12:38:10	00:00:05	107.417	1.79028	26.08	26.0902	39.35	17.2531	89.8193	50.4883	78.2959	194.556								10.9962	75.8193	42.5703	33.1622		0.00631176	0.13969	0.055346	0.0370776		0.0211962	0.142136	0.0309252	0.0509431
2015-07-14	12:38:15	00:00:05	107.5	1.79167	26.08	26.0901	39.12	14.8697	92.3462	47.3755	82.9285	194.5								8.61277	78.3462	39.4575	37.7948		0.00426548	0.147233	0.0489994	0.0457299		0.0211142	0.141582	0.0310278	0.0509161
2015-07-14	12:38:20	00:00:05	107.583	1.79306	26.08	26.09	39.39	17.7155	99.4629	49.5728	78.595	194.444								11.4586	85.4629	41.6548	33.4613		0.00674287	0.169266	0.0534493	0.0376154		0.0210057	0.141289	0.0310986	0.0505927
2015-07-14	12:38:25	00:00:05	107.667	1.79444	26.08	26.0898	39.48	18.8187	99.4629	46.9482	67.5354	194.389								12.5618	85.4629	39.0302	22.4017		0.00781406	0.169266	0.0481511	0.0197629		0.0209303	0.140942	0.0311473	0.05021
2015-07-14	12:38:30	00:00:05	107.75	1.79583	26.08	26.0898	39.61	20.5719	105.225	57.4768	64.8071	194.333								14.315	91.225	49.5588	19.6734		0.00963579	0.187941	0.0706274	0.0160466		0.0208609	0.14076	0.0313326	0.04971
2015-07-14	12:38:35	00:00:05	107.833	1.79722	26.08	26.0896	39.81	23.6969	110.303	50.0305	69.3359	194.278								17.44	96.303	42.1125	24.2022		0.0132263	0.205002	0.0543944	0.0223719		0.0207956	0.14076	0.0314726	0.0495029
2015-07-14	12:38:40	00:00:05	107.917	1.79861	26.08	26.0895	39.66	21.3013	110.303	48.6816	53.4729	194.222								15.0444	96.303	40.7636	8.33921		0.0104354	0.205002	0.0516269	0.00405027		0.0206959	0.140563	0.0316178	0.0493784
2015-07-14	12:38:45	00:00:05	108	1.8	26.08	26.0894	39.8	23.526	113.501	50.4883	60.8276	194.167								17.2691	99.501	42.5703	15.6939		0.013019	0.21603	0.055346	0.0111674		0.0206422	0.140464	0.031752	0.0491352
2015-07-14	12:38:50	00:00:05	108.083	1.80139	26.08	26.0893	39.82	23.8678	104.248	44.4946	61.5082	194.111								17.6109	90.248	36.5766	16.3745		0.0134348	0.184723	0.0433888	0.0119543		0.0206216	0.140106	0.0318934	0.0491113
2015-07-14	12:38:55	00:00:05	108.167	1.80278	26.08	26.0892	39.71	22.0642	107.227	42.5659	50.2686	194.056								15.8073	93.227	34.6479	5.13491		0.0112971	0.194601	0.0397778	0.00186077		0.0205846	0.140001	0.0319929	0.0488871
2015-07-14	12:39:00	00:00:05	108.25	1.80417	26.08	26.0891	39.53	19.4702	117.896	54.8584	46.109	194								13.2133	103.896	46.9404	0.975309		0.00847422	0.231539	0.0647382	0.000129594		0.0205513	0.14005	0.0321628	0.0485181
2015-07-14	12:39:05	00:00:05	108.333	1.80556	26.08	26.089	39.74	22.5372	123.657	46.5332	67.2791	193.944								16.2803	109.657	38.6152	22.1454		0.0118442	0.252475	0.0473325	0.0194015		0.0205229	0.14012	0.0321594	0.0485253
2015-07-14	12:39:10	00:00:05	108.417	1.80694	26.08	26.0889	39.95	26.2543	122.485	46.5332	55.8746	193.889								19.9974	108.485	38.6152	10.7409		0.0164725	0.24816	0.0473325	0.0060784		0.0205034	0.14012	0.0323034	0.0482358
2015-07-14	12:39:15	00:00:05	108.5	1.80833	26.08	26.0888	39.95	26.2543	131.006	53.3508	65.7837	193.833								19.9974	117.006	45.4328	20.65		0.0164725	0.280159	0.0614356	0.0173433		0.0204955	0.140306	0.0324978	0.0482243
2015-07-14	12:39:20	00:00:05	108.583	1.80972	26.07	26.0887	40.03	27.8748	129.761	51.4221	63.8428	193.778								21.6179	115.761	43.5041	18.7091		0.0186655	0.275393	0.0573062	0.0148038		0.0204838	0.140306	0.032675	0.0481702
2015-07-14	12:39:25	00:00:05	108.667	1.81111	26.08	26.0886	40.17	31.0272	136.182	54.3457	67.0288	193.722								24.7703	122.182	46.4277	21.8951		0.0232201	0.300302	0.0636077	0.0190509		0.020504	0.140657	0.0328384	0.0480741
2015-07-14	12:39:30	00:00:05	108.75	1.8125	26.08	26.0885	40	27.2522	127.271	67.5781	57.3303	193.667								20.9953	113.271	59.6601	12.1966		0.0178107	0.265954	0.0951035	0.00745293		0.0204928	0.140865	0.033166	0.0478987
2015-07-14	12:39:35	00:00:05	108.833	1.81389	26.08	26.0885	39.99	27.0477	137.5	65.0269	62.8967	193.611								20.7908	123.5	57.1089	17.763		0.0175333	0.305515	0.088665	0.0136215		0.0204721	0.141122	0.0333861	0.047569
2015-07-14	12:39:40	00:00:05	108.917	1.81528	26.08	26.0884	40.06	28.5126	132.275	48.6816	75.0793	193.556								22.2557	118.275	40.7636	29.9456		0.0195566	0.285049	0.0516269	0.0314802		0.0204456	0.141258	0.0334519	0.0475434
2015-07-14	12:39:45	00:00:05	109	1.81667	26.08	26.0883	40.38	36.6638	137.5	44.4946	89.2334	193.5								30.4069	123.5	36.5766	44.0997		0.0322616	0.305515	0.0433888	0.0585699		0.0204687	0.141599	0.0335256	0.0476753
2015-07-14	12:39:50	00:00:05	109.083	1.81806	26.08	26.0882	40.08	28.949	148.608	48.6816	49.7253	193.444								22.6921	134.608	40.7636	4.59161		0.0201754	0.350775	0.0516269	0.00155522		0.0204162	0.142096	0.0337013	0.047615
2015-07-14	12:39:55	00:00:05	109.167	1.81944	26.08	26.0881	40.02	27.6642	150.049	44.8914	56.4941	193.389								21.4073	136.049	36.9734	11.3604		0.0183747	0.356818	0.0441463	0.00665045		0.0203496	0.142601	0.0337045	0.0475603
2015-07-14	12:40:00	00:00:05	109.25	1.82083	26.08	26.088	39.83	24.0417	142.92	60.8276	57.3303	193.333								17.7848	128.92	52.9096	12.1966		0.0136482	0.327305	0.078442	0.00745293		0.0203127	0.142875	0.033973	0.047385
2015-07-14	12:40:05	00:00:05	109.333	1.82222	26.08	26.088	39.75	22.699	147.168	65.6494	48.3093	193.278								16.4421	133.168	57.7314	3.17561		0.0120335	0.344776	0.0902203	0.000860855		0.0202734	0.143443	0.034234	0.0471794
2015-07-14	12:40:10	00:00:05	109.417	1.82361	26.08	26.0879	40.07	28.7292	129.761	49.1272	67.2791	193.222								22.4723	115.761	41.2092	22.1454		0.0198628	0.275393	0.0525351	0.0194015		0.0202548	0.143626	0.034389	0.0471079
2015-07-14	12:40:15	00:00:05	109.5	1.825	26.08	26.0878	39.99	27.0477	134.863	58.5693	68.3014	193.167								20.7908	120.863	50.6513	23.1677		0.0175333	0.295119	0.0731413	0.020858		0.0202437	0.143708	0.0346619	0.0470754
2015-07-14	12:40:20	00:00:05	109.583	1.82639	26.08	26.0877	40.01	27.4567	147.168	56.9458	52.124	193.111								21.1998	133.168	49.0278	6.99031		0.0180898	0.344776	0.0694175	0.00305191		0.0202483	0.144055	0.0349053	0.0469424
2015-07-14	12:40:25	00:00:05	109.667	1.82778	26.07	26.0876	39.99	27.0477	129.761	43.7134	64.8071	193.056								20.7908	115.761	35.7954	19.6734		0.0175333	0.275393	0.041912	0.0160466		0.0202527	0.144204	0.0350112	0.0468614
2015-07-14	12:40:30	00:00:05	109.75	1.82917	26.07	26.0875	40.1	29.3945	142.92	39.3372	52.89	193								23.1376	128.92	31.4192	7.75631		0.0208145	0.327305	0.0340017	0.00360584		0.0202869	0.144497	0.0350513	0.046623
2015-07-14	12:40:35	00:00:05	109.833	1.83056	26.08	26.0874	40.2	31.7627	148.608	37.677	42.1906	192.944								25.5058	134.608	29.759	-2.94309		0.0243359	0.350775	0.0311661	0		0.0203374	0.144906	0.0350558	0.0465265
2015-07-14	12:40:40	00:00:05	109.917	1.83194	26.08	26.0873	40.2	31.7627	144.336	52.8564	55.0598	192.889								25.5058	130.336	44.9384	9.92611		0.0243359	0.333091	0.0603668	0.00535591		0.020387	0.145346	0.0352322	0.0464031
2015-07-14	12:40:45	00:00:05	110	1.83333	26.08	26.0872	40.25	33.0322	140.186	41.8213	56.4941	192.833								26.7753	126.186	33.9033	11.3604		0.0263078	0.316243	0.0384156	0.00665045		0.0204188	0.145497	0.0353656	0.0461514
2015-07-14	12:40:50	00:00:05	110.083	1.83472	26.08	26.0871	40.37	36.3647	142.92	46.9482	62.8967	192.778								30.1078	128.92	39.0302	17.763		0.0317541	0.327305	0.0481511	0.0136215		0.0204684	0.14579	0.0354715	0.0461678
2015-07-14	12:40:55	00:00:05	110.167	1.83611	26.08	26.0871	40.22	32.2632	148.608	35.4858	41.1621	192.722								26.0063	134.608	27.5678	-3.97159		0.0251064	0.350775	0.0275679	0		0.0205143	0.14627	0.0355281	0.0459948
2015-07-14	12:41:00	00:00:05	110.25	1.8375	26.08	26.087	40.42	37.8784	133.569	50.4883	57.9712	192.667								31.6215	119.569	42.5703	12.8375		0.0343535	0.290068	0.055346	0.008091		0.0206065	0.146291	0.0356623	0.0456949
2015-07-14	12:41:05	00:00:05	110.333	1.83889	26.08	26.0869	40.43	38.1897	138.818	42.5659	44.9707	192.611								31.9328	124.818	34.6479	-0.162991		0.0348975	0.310762	0.0397778	0		0.0207002	0.146604	0.0357027	0.0454857
2015-07-14	12:41:10	00:00:05	110.417	1.84028	26.08	26.0868	40.48	39.801	144.336	45.2942	42.7917	192.556								33.5441	130.336	37.3762	-2.34199		0.0377648	0.333091	0.0449202	0		0.0207989	0.146976	0.0358413	0.0451746
2015-07-14	12:41:15	00:00:05	110.5	1.84167	26.08	26.0867	40.47	39.4714	141.553	38.3301	54.8584	192.5								33.2145	127.553	30.4121	9.72471		0.0371713	0.321756	0.0322705	0.00518267		0.020911	0.147401	0.0359107	0.0450394
2015-07-14	12:41:20	00:00:05	110.583	1.84306	26.08	26.0867	40.58	43.2861	126.074	42.1875	37.0728	192.444								37.0292	112.074	34.2695	-8.06089		0.0442531	0.26146	0.0390833	0		0.0210512	0.147303	0.0360391	0.044833
2015-07-14	12:41:25	00:00:05	110.667	1.84444	26.07	26.0865	40.56	42.5598	128.516	52.8564	49.7253	192.389								36.3029	114.516	44.9384	4.59161		0.0428691	0.270658	0.0603668	0.00155522		0.0211747	0.147482	0.036243	0.0447292
2015-07-14	12:41:30	00:00:05	110.75	1.84583	26.07	26.0864	40.57	42.9199	123.657	61.9873	56.9092	192.333								36.663	109.657	54.0693	11.7755		0.0435532	0.252475	0.081218	0.00704451		0.0213127	0.147426	0.0365442	0.0444012
2015-07-14	12:41:35	00:00:05	110.833	1.84722	26.08	26.0864	40.61	44.4092	129.761	31.2988	45.9442	192.278								38.1523	115.761	23.3808	0.810509		0.0464256	0.275393	0.0211665	9.63046e-05		0.0214691	0.147557	0.036619	0.0441222
2015-07-14	12:41:40	00:00:05	110.917	1.84861	26.07	26.0863	40.51	40.8081	127.271	34.8877	55.8746	192.222								34.5512	113.271	26.9697	10.7409		0.0395999	0.265954	0.0266149	0.0060784		0.0216073	0.147576	0.0367095	0.0439185
2015-07-14	12:41:45	00:00:05	111	1.85	26.08	26.0862	40.59	43.6584	133.569	40.7349	45.1324	192.167								37.4015	119.569	32.8169	-0.00129091		0.0449689	0.290068	0.0364603	0		0.0217484	0.147837	0.0368454	0.0438082
2015-07-14	12:41:50	00:00:05	111.083	1.85139	26.08	26.0862	40.69	47.583	119.019	41.8213	36.8195	192.111								41.3261	105.019	33.9033	-8.31419		0.0527743	0.235566	0.0384156	0		0.0219406	0.147651	0.036973	0.0435962
2015-07-14	12:41:55	00:00:05	111.167	1.85278	26.07	26.0861	40.63	45.1782	127.271	52.3804	53.8635	192.056								38.9213	113.271	44.4624	8.72981		0.0479357	0.265954	0.0593444	0.00435884		0.0221149	0.147592	0.03718	0.0434213
2015-07-14	12:42:00	00:00:05	111.25	1.85417	26.08	26.086	40.69	47.583	115.674	41.0889	51.1871	192								41.3261	101.674	33.1709	6.05341		0.0527743	0.223647	0.0370932	0.00242285		0.0223106	0.14749	0.0372852	0.0427724
2015-07-14	12:42:05	00:00:05	111.333	1.85556	26.07	26.0859	40.59	43.6584	127.271	43.3228	53.6682	191.944								37.4015	113.271	35.4048	8.53451		0.0449689	0.265954	0.0411808	0.00420349		0.0224659	0.147389	0.0374109	0.0424326
2015-07-14	12:42:10	00:00:05	111.417	1.85694	26.07	26.0858	40.7	47.998	120.166	27.478	53.6682	191.889								41.7411	106.166	19.56	8.53451		0.053627	0.239707	0.0158985	0.00420349		0.0226431	0.14707	0.0374618	0.042206
2015-07-14	12:42:15	00:00:05	111.5	1.85833	26.08	26.0857	40.67	46.7651	119.019	39.3372	47.9645	191.833								40.5082	105.019	31.4192	2.83081		0.051109	0.235566	0.0340017	0.000715919		0.0228322	0.147036	0.0375609	0.042104
2015-07-14	12:42:20	00:00:05	111.583	1.85972	26.08	26.0856	40.64	45.5688	133.569	45.7031	45.7825	191.778								39.3119	119.569	37.7851	0.648809		0.0487097	0.290068	0.0457111	6.73961e-05		0.023008	0.146971	0.0377406	0.0417783
2015-07-14	12:42:25	00:00:05	111.667	1.86111	26.08	26.0855	40.64	45.5688	127.271	38.0005	55.4657	191.722								39.3119	113.271	30.0825	10.332		0.0487097	0.265954	0.0317114	0.00571152		0.0231887	0.146806	0.0378482	0.0414762
2015-07-14	12:42:30	00:00:05	111.75	1.8625	26.07	26.0854	40.76	50.5981	136.182	52.3804	55.0598	191.667								44.3412	122.182	44.4624	9.92611		0.0590851	0.300302	0.0593444	0.00535591		0.0234095	0.14674	0.0380469	0.0413713
2015-07-14	12:42:35	00:00:05	111.833	1.86389	26.08	26.0853	40.7	47.998	123.657	38.3301	55.0598	191.611								41.7411	109.657	30.4121	9.92611		0.053627	0.252475	0.0322705	0.00535591		0.0236114	0.146562	0.0381262	0.041276
2015-07-14	12:42:40	00:00:05	111.917	1.86528	26.07	26.0852	40.76	50.5981	120.166	40.0269	59.2712	191.556								44.3412	106.166	32.1089	14.1375		0.0590851	0.239707	0.0352068	0.0094449		0.0238276	0.14622	0.0382585	0.041194
2015-07-14	12:42:45	00:00:05	112	1.86667	26.07	26.0851	40.6	44.0308	124.854	40.7349	55.0598	191.5								37.7739	110.854	32.8169	9.92611		0.0456893	0.25691	0.0364603	0.00535591		0.0239925	0.14595	0.0383992	0.0411006
2015-07-14	12:42:50	00:00:05	112.083	1.86806	26.07	26.085	40.58	43.2861	124.854	45.2942	72.0093	191.444								37.0292	110.854	37.3762	26.8756		0.0442531	0.25691	0.0449202	0.0264661		0.0241615	0.145559	0.0385586	0.0411529
2015-07-14	12:42:55	00:00:05	112.167	1.86944	26.07	26.0848	40.72	48.8464	124.854	43.3228	55.4657	191.389								42.5895	110.854	35.4048	10.332		0.055386	0.25691	0.0411808	0.00571152		0.02437	0.145357	0.0386995	0.0411246
2015-07-14	12:43:00	00:00:05	112.25	1.87083	26.08	26.0847	40.61	44.4092	123.657	38.6597	64.8071	191.333								38.1523	109.657	30.7417	19.6734		0.0464256	0.252475	0.0328333	0.0160466		0.0245393	0.145179	0.0387701	0.0410865
2015-07-14	12:43:05	00:00:05	112.333	1.87222	26.08	26.0847	40.67	46.7651	116.772	39.3372	67.5354	191.278								40.5082	102.772	31.4192	22.4017		0.051109	0.227534	0.0340017	0.0197629		0.0247191	0.144854	0.0388667	0.0411472
2015-07-14	12:43:10	00:00:05	112.417	1.87361	26.07	26.0845	40.69	47.583	132.275	42.5659	51.9348	191.222								41.3261	118.275	34.6479	6.80111		0.0527743	0.285049	0.0397778	0.0029205		0.0249132	0.144724	0.0389952	0.041077
2015-07-14	12:43:15	00:00:05	112.5	1.875	26.08	26.0845	40.67	46.7651	124.854	41.0889	64.0808	191.167								40.5082	110.854	33.1709	18.9471		0.051109	0.25691	0.0370932	0.015107		0.0250925	0.144308	0.039103	0.0411357
2015-07-14	12:43:20	00:00:05	112.583	1.87639	26.07	26.0843	40.58	43.2861	121.313	48.6816	41.3086	191.111								37.0292	107.313	40.7636	-3.82509		0.0442531	0.243874	0.0516269	0		0.0252674	0.143862	0.0393017	0.0411357
2015-07-14	12:43:25	00:00:05	112.667	1.87778	26.07	26.0842	40.55	42.2058	127.271	45.2942	59.9304	191.056								35.9489	113.271	37.3762	14.7967		0.0422006	0.265954	0.0449202	0.0101612		0.0254316	0.143823	0.0394215	0.0411685
2015-07-14	12:43:30	00:00:05	112.75	1.87917	26.07	26.0841	40.61	44.4092	124.854	32.8979	55.2612	191								38.1523	110.854	24.9799	10.1275		0.0464256	0.25691	0.0235361	0.00553128		0.0256024	0.143706	0.039511	0.0411876
2015-07-14	12:43:35	00:00:05	112.833	1.88056	26.07	26.084	40.54	41.8518	129.761	49.5728	57.3303	190.944								35.5949	115.761	41.6548	12.1966		0.041536	0.275393	0.0534493	0.00745293		0.025755	0.143392	0.0397101	0.0412187
2015-07-14	12:43:40	00:00:05	112.917	1.88194	26.08	26.0839	40.62	44.7937	122.485	50.4883	66.0278	190.889								38.5368	108.485	42.5703	20.8941		0.0471784	0.24816	0.055346	0.0176733		0.0259414	0.142939	0.0398802	0.0412923
2015-07-14	12:43:45	00:00:05	113	1.88333	26.08	26.0838	40.63	45.1782	127.271	38.3301	61.7371	190.833								38.9213	113.271	30.4121	16.6034		0.0479357	0.265954	0.0322705	0.0122235		0.026126	0.142534	0.0399615	0.0413363
2015-07-14	12:43:50	00:00:05	113.083	1.88472	26.08	26.0837	40.52	41.1499	141.553	45.2942	53.0823	190.778								34.893	127.553	37.3762	7.94861		0.0402301	0.321756	0.0449202	0.0037503		0.0262851	0.142624	0.0401454	0.0413487
2015-07-14	12:43:55	00:00:05	113.167	1.88611	26.08	26.0837	40.56	42.5598	120.166	33.1726	60.6018	190.722								36.3029	106.166	25.2546	15.4681		0.0428691	0.239707	0.0239526	0.0109108		0.0264468	0.142393	0.0401778	0.0413941
2015-07-14	12:44:00	00:00:05	113.25	1.8875	26.08	26.0837	40.63	45.1782	132.275	56.9458	53.4729	190.667								38.9213	118.275	49.0278	8.33921		0.0479357	0.285049	0.0694175	0.00405027		0.0266251	0.142263	0.0404351	0.0413935
2015-07-14	12:44:05	00:00:05	113.333	1.88889	26.08	26.0836	40.58	43.2861	138.818	42.5659	68.042	190.611								37.0292	124.818	34.6479	22.9083		0.0442531	0.310762	0.0397778	0.0204846		0.0267907	0.142468	0.0405309	0.0414789
2015-07-14	12:44:10	00:00:05	113.417	1.89028	26.08	26.0835	40.46	39.1479	144.336	60.8276	55.8746	190.556								32.891	130.336	52.9096	10.7409		0.0365923	0.333091	0.078442	0.0060784		0.0269132	0.142493	0.0408101	0.0415042
2015-07-14	12:44:15	00:00:05	113.5	1.89167	26.08	26.0835	40.52	41.1499	137.5	44.8914	62.4329	190.5								34.893	123.5	36.9734	17.2992		0.0402301	0.305515	0.0441463	0.0130555		0.0270672	0.142557	0.0409266	0.0415586
2015-07-14	12:44:20	00:00:05	113.583	1.89306	26.08	26.0835	40.46	39.1479	115.674	41.8213	52.5085	190.444								32.891	101.674	33.9033	7.37481		0.0365923	0.223647	0.0384156	0.00332561		0.0272043	0.142027	0.0410684	0.0415724
2015-07-14	12:44:25	00:00:05	113.667	1.89444	26.07	26.0833	40.46	39.1479	128.516	32.0862	53.8635	190.389								32.891	114.516	24.1682	8.72981		0.0365923	0.270658	0.0223215	0.00435884		0.0273262	0.141767	0.0411443	0.0415906
2015-07-14	12:44:30	00:00:05	113.75	1.89583	26.07	26.0832	40.37	36.3647	140.186	39.6851	51.7487	190.333								30.1078	126.186	31.7671	6.61501		0.0317541	0.316243	0.0346076	0.00279338		0.0274477	0.141673	0.0412417	0.0416022
2015-07-14	12:44:35	00:00:05	113.833	1.89722	26.07	26.0831	40.44	38.5071	116.772	34.021	55.0598	190.278								32.2502	102.772	26.103	9.92611		0.0354556	0.227534	0.0252564	0.00535591		0.0275835	0.141412	0.0413393	0.0416246
2015-07-14	12:44:40	00:00:05	113.917	1.89861	26.08	26.083	40.41	37.5671	123.657	31.5552	56.7017	190.222								31.3102	109.657	23.6372	11.568		0.0338126	0.252475	0.0215401	0.00684646		0.0277081	0.141213	0.0414222	0.0416531
2015-07-14	12:44:45	00:00:05	114	1.9	26.08	26.0829	40.38	36.6638	133.569	39.3372	57.5439	190.167								30.4069	119.569	31.4192	12.4102		0.0322616	0.290068	0.0340017	0.00766339		0.0278203	0.141127	0.041552	0.041685
2015-07-14	12:44:50	00:00:05	114.083	1.90139	26.08	26.0828	40.44	38.5071	124.854	52.8564	58.1848	190.111								32.2502	110.854	44.9384	13.0511		0.0354556	0.25691	0.0603668	0.00830802		0.0279454	0.14081	0.0417981	0.0417085
2015-07-14	12:44:55	00:00:05	114.167	1.90278	26.08	26.0827	40.44	38.5071	121.313	37.677	63.3667	190.056								32.2502	107.313	29.759	18.233		0.0354556	0.243874	0.0311661	0.0142042		0.0280698	0.140414	0.0419085	0.0417673
2015-07-14	12:45:00	00:00:05	114.25	1.90417	26.08	26.0827	40.38	36.6638	136.182	32.0862	65.7837	190								30.4069	122.182	24.1682	20.65		0.0322616	0.300302	0.0223215	0.0173433		0.0281852	0.140518	0.0419816	0.0418339
2015-07-14	12:45:05	00:00:05	114.333	1.90556	26.08	26.0826	40.43	38.1897	160.669	40.7349	65.0482	189.944								31.9328	146.669	32.8169	19.9145		0.0348975	0.402537	0.0364603	0.0163632		0.0283068	0.1409	0.0421256	0.0419021
2015-07-14	12:45:10	00:00:05	114.417	1.90694	26.08	26.0825	40.44	38.5071	142.92	39.3372	69.8608	189.889								32.2502	128.92	31.4192	24.7271		0.0354556	0.327305	0.0340017	0.0231552		0.0284441	0.141034	0.0422057	0.0419985
2015-07-14	12:45:15	00:00:05	114.5	1.90833	26.08	26.0824	40.38	36.6638	140.186	41.8213	74.2249	189.833								30.4069	126.186	33.9033	29.0912		0.0322616	0.316243	0.0384156	0.030052		0.0285601	0.141057	0.0423163	0.0421198
2015-07-14	12:45:20	00:00:05	114.583	1.90972	26.08	26.0823	40.36	36.0718	156.03	32.0862	69.5984	189.778								29.8149	142.03	24.1682	24.4647		0.0312601	0.382311	0.0223215	0.0227624		0.0286713	0.141542	0.0423466	0.0422147
2015-07-14	12:45:25	00:00:05	114.667	1.91111	26.08	26.0822	40.45	38.8245	147.168	26.825	50.6348	189.722								32.5676	133.168	18.907	5.50111		0.036017	0.344776	0.0150557	0.00207817		0.0287999	0.141749	0.0423196	0.0422233
2015-07-14	12:45:30	00:00:05	114.75	1.9125	26.08	26.0822	40.37	36.3647	136.182	40.0269	65.0482	189.667								30.1078	122.182	32.1089	19.9145		0.0317541	0.300302	0.0352068	0.0163632		0.0289045	0.141812	0.0424204	0.0422915
2015-07-14	12:45:35	00:00:05	114.833	1.91389	26.08	26.0822	40.43	38.1897	148.608	35.1868	74.2249	189.611								31.9328	134.608	27.2688	29.0912		0.0348975	0.350775	0.0270899	0.030052		0.0290281	0.142146	0.0424646	0.0424159
2015-07-14	12:45:40	00:00:05	114.917	1.91528	26.08	26.0821	40.37	36.3647	140.186	50.0305	61.2793	189.556								30.1078	126.186	42.1125	16.1456		0.0317541	0.316243	0.0543944	0.0116874		0.0291498	0.142532	0.0426015	0.0424646
2015-07-14	12:45:45	00:00:05	115	1.91667	26.08	26.0821	40.41	37.5671	133.569	42.9443	55.4657	189.5								31.3102	119.569	35.0263	10.332		0.0338126	0.290068	0.0404769	0.00571152		0.029253	0.14267	0.0427107	0.0424884
2015-07-14	12:45:50	00:00:05	115.083	1.91806	26.08	26.082	40.4	37.262	148.608	37.677	57.7576	189.444								31.0051	134.608	29.759	12.6239		0.0332857	0.350775	0.0311661	0.00787615		0.0293496	0.14308	0.0427694	0.0425212
2015-07-14	12:45:55	00:00:05	115.167	1.91944	26.08	26.082	40.43	38.1897	142.92	32.3547	52.3163	189.389								31.9328	128.92	24.4367	7.18261		0.0348975	0.327305	0.0227206	0.00318769		0.0294295	0.14341	0.0427941	0.0425276
2015-07-14	12:46:00	00:00:05	115.25	1.92083	26.07	26.0819	40.37	36.3647	131.006	55.8838	59.7107	189.333								30.1078	117.006	47.9658	14.577		0.0317541	0.280159	0.0670214	0.00992027		0.029484	0.143677	0.0430451	0.0425677
2015-07-14	12:46:05	00:00:05	115.333	1.92222	26.07	26.0818	40.4	37.262	129.761	35.4858	68.042	189.278								31.0051	115.761	27.5678	22.9083		0.0332857	0.275393	0.0275679	0.0204846		0.0295244	0.143908	0.0431067	0.0426368
2015-07-14	12:46:10	00:00:05	115.417	1.92361	26.07	26.0817	40.31	34.6497	134.863	38.3301	56.4941	189.222								28.3928	120.863	30.4121	11.3604		0.0289031	0.295119	0.0322705	0.00665045		0.0295554	0.144298	0.043153	0.0426602
2015-07-14	12:46:15	00:00:05	115.5	1.925	26.07	26.0817	40.35	35.7788	133.569	39.0015	56.0791	189.167								29.5219	119.569	31.0835	10.9454		0.0307688	0.290068	0.0334208	0.00626509		0.0295613	0.144559	0.0432041	0.0426863
2015-07-14	12:46:20	00:00:05	115.583	1.92639	26.07	26.0816	40.34	35.4919	141.553	48.2422	79.4983	189.111								29.235	127.553	40.3242	34.3646		0.0302905	0.321756	0.0507372	0.0392574		0.0295845	0.145157	0.0433669	0.0428499
2015-07-14	12:46:25	00:00:05	115.667	1.92778	26.07	26.0815	40.35	35.7788	145.728	38.3301	60.6018	189.056								29.5219	131.728	30.4121	15.4681		0.0307688	0.338815	0.0322705	0.0109108		0.0295718	0.14562	0.0433469	0.0428954
2015-07-14	12:46:30	00:00:05	115.75	1.92917	26.07	26.0814	40.41	37.5671	132.275	39.6851	62.6648	189								31.3102	118.275	31.7671	17.5311		0.0338126	0.285049	0.0346076	0.0133374		0.0295865	0.145876	0.0434425	0.0429509
2015-07-14	12:46:35	00:00:05	115.833	1.93056	26.07	26.0813	40.45	38.8245	122.485	37.3535	58.1848	188.944								32.5676	108.485	29.4355	13.0511		0.036017	0.24816	0.0306245	0.00830802		0.0296	0.146056	0.0435063	0.0429856
2015-07-14	12:46:40	00:00:05	115.917	1.93194	26.07	26.0812	40.5	40.4663	123.657	36.7188	72.8333	188.889								34.2094	109.657	28.8008	27.6996		0.0389734	0.252475	0.0295722	0.0277797		0.0296123	0.146192	0.0436158	0.0430897
2015-07-14	12:46:45	00:00:05	116	1.93333	26.07	26.0812	40.47	39.4714	114.575	35.791	66.0278	188.833								33.2145	100.575	27.873	20.8941		0.0371713	0.219783	0.0280591	0.0176733		0.0296073	0.146268	0.0436381	0.04315
2015-07-14	12:46:50	00:00:05	116.083	1.93472	26.07	26.0811	40.41	37.5671	126.074	43.7134	89.5752	188.778								31.3102	112.074	35.7954	44.4415		0.0338126	0.26146	0.041912	0.0592997		0.0296095	0.146458	0.0436498	0.0433971
2015-07-14	12:46:55	00:00:05	116.167	1.93611	26.07	26.081	40.4	37.262	128.516	37.3535	83.2458	188.722								31.0051	114.516	29.4355	38.1121		0.0332857	0.270658	0.0306245	0.0463473		0.0295957	0.146716	0.0437423	0.0435902
2015-07-14	12:47:00	00:00:05	116.25	1.9375	26.07	26.0809	40.53	41.4978	132.275	56.9458	81.3477	188.667								35.2409	118.275	49.0278	36.214		0.0408754	0.285049	0.0694175	0.0427009		0.029601	0.147147	0.0440079	0.0437681
2015-07-14	12:47:05	00:00:05	116.333	1.93889	26.07	26.0808	40.37	36.3647	117.896	41.8213	70.6604	188.611								30.1078	103.896	33.9033	25.5267		0.0317541	0.231539	0.0384156	0.0243679		0.0294988	0.147407	0.0441434	0.0438586
2015-07-14	12:47:10	00:00:05	116.417	1.94028	26.07	26.0807	40.38	36.6638	111.353	50.0305	66.0278	188.556								30.4069	97.353	42.1125	20.8941		0.0322616	0.208599	0.0543944	0.0176733		0.0294429	0.147479	0.0443576	0.0439322
2015-07-14	12:47:15	00:00:05	116.5	1.94167	26.07	26.0807	40.42	37.8784	107.227	55.3711	66.2781	188.5								31.6215	93.227	47.4531	21.1444		0.0343535	0.194601	0.0658761	0.0180141		0.0293661	0.14745	0.0446229	0.0440012
2015-07-14	12:47:20	00:00:05	116.583	1.94306	26.07	26.0806	40.38	36.6638	111.353	36.0962	67.7887	188.444								30.4069	97.353	28.1782	22.655		0.0322616	0.208599	0.0285536	0.0201225		0.0292943	0.147638	0.0447319	0.044085
2015-07-14	12:47:25	00:00:05	116.667	1.94444	26.07	26.0805	40.49	40.1367	115.674	45.7031	58.8318	188.389								33.8798	101.674	37.7851	13.6981		0.0383728	0.223647	0.0457111	0.00897848		0.0292446	0.147877	0.0448858	0.0441224
2015-07-14	12:47:30	00:00:05	116.75	1.94583	26.07	26.0804	40.56	42.5598	124.854	36.7188	68.042	188.333								36.3029	110.854	28.8008	22.9083		0.0428691	0.25691	0.0295722	0.0204846		0.0291849	0.14823	0.0449864	0.0441776
2015-07-14	12:47:35	00:00:05	116.833	1.94722	26.07	26.0803	40.48	39.801	109.277	42.9443	62.2009	188.278								33.5441	95.277	35.0263	17.0672		0.0377648	0.20151	0.0404769	0.0127758		0.0291457	0.148364	0.0451156	0.0442308
2015-07-14	12:47:40	00:00:05	116.917	1.94861	26.07	26.0802	40.43	38.1897	117.896	43.3228	83.2458	188.222								31.9328	103.896	35.4048	38.1121		0.0348975	0.231539	0.0411808	0.0463473		0.0290815	0.148726	0.045266	0.0444157
2015-07-14	12:47:45	00:00:05	117	1.95	26.07	26.0802	40.46	39.1479	111.353	39.6851	87.1826	188.167								32.891	97.353	31.7671	42.0489		0.0365923	0.208599	0.0346076	0.0542628		0.0290105	0.148993	0.0453801	0.0446418
2015-07-14	12:47:50	00:00:05	117.083	1.95139	26.07	26.0801	40.47	39.4714	112.427	24.5941	66.5283	188.111								33.2145	98.427	16.6761	21.3946		0.0371713	0.212302	0.0123095	0.0183572		0.0289271	0.149274	0.0454161	0.0447175
2015-07-14	12:47:55	00:00:05	117.167	1.95278	26.07	26.08	40.55	42.2058	105.225	26.825	109.32	188.056								35.9489	91.225	18.907	64.1863		0.0422006	0.187941	0.0150557	0.106939		0.0288999	0.149569	0.0454505	0.045163
2015-07-14	12:48:00	00:00:05	117.25	1.95417	26.07	26.0799	40.5	40.4663	112.427	51.8921	70.1294	188								34.2094	98.427	43.9741	24.9957		0.0389734	0.212302	0.0583025	0.02356		0.028875	0.149939	0.0456532	0.0452566
2015-07-14	12:48:05	00:00:05	117.333	1.95556	26.07	26.0798	40.69	47.583	117.896	34.8877	77.4048	187.944								41.3261	103.896	26.9697	32.2711		0.0527743	0.231539	0.0266149	0.0354925		0.0288951	0.150341	0.0457047	0.0454045
2015-07-14	12:48:10	00:00:05	117.417	1.95694	26.07	26.0797	40.57	42.9199	107.227	35.4858	67.0288	187.889								36.663	93.227	27.5678	21.8951		0.0435532	0.194601	0.0275679	0.0190509		0.0288951	0.15068	0.045808	0.0454143
2015-07-14	12:48:15	00:00:05	117.5	1.95833	26.07	26.0797	40.66	46.3623	124.854	32.3547	69.8608	187.833								40.1054	110.854	24.4367	24.7271		0.0502963	0.25691	0.0227206	0.0231552		0.0289232	0.151279	0.0458855	0.0455108
2015-07-14	12:48:20	00:00:05	117.583	1.95972	26.07	26.0796	40.52	41.1499	119.019	24.4019	72.8333	187.778								34.893	105.019	16.4839	27.6996		0.0402301	0.235566	0.0120827	0.0277797		0.0289065	0.151899	0.0458836	0.0456266
2015-07-14	12:48:25	00:00:05	117.667	1.96111	26.07	26.0795	40.51	40.8081	115.674	16.687	77.6978	187.722								34.5512	101.674	8.769	32.5641		0.0395999	0.223647	0.00439027	0.0360108		0.0288749	0.152399	0.0458747	0.0457464
2015-07-14	12:48:30	00:00:05	117.75	1.9625	26.07	26.0794	40.54	41.8518	111.353	13.1897	79.1992	187.667								35.5949	97.353	5.2717	34.0655		0.041536	0.208599	0.00194092	0.0387108		0.0288482	0.152858	0.0458728	0.0459077
2015-07-14	12:48:35	00:00:05	117.833	1.96389	26.07	26.0793	40.56	42.5598	110.303	16.687	76.8127	187.611								36.3029	96.303	8.769	31.679		0.0428691	0.205002	0.00439027	0.0344538		0.0288565	0.153249	0.0458452	0.0460498
2015-07-14	12:48:40	00:00:05	117.917	1.96528	26.07	26.0792	40.59	43.6584	106.226	15.0177	69.3359	187.556								37.4015	92.226	7.0997	24.2022		0.0449689	0.19126	0.00312888	0.0223719		0.0288595	0.153557	0.0457653	0.0461426
2015-07-14	12:48:45	00:00:05	118	1.96667	26.07	26.0792	40.72	48.8464	112.427	15.0177	68.042	187.5								42.5895	98.427	7.0997	22.9083		0.055386	0.212302	0.00312888	0.0204846		0.02892	0.154002	0.0457178	0.0462258
2015-07-14	12:48:50	00:00:05	118.083	1.96806	26.07	26.0791	40.63	45.1782	103.271	15.2283	70.929	187.444								38.9213	89.271	7.3103	25.7953		0.0479357	0.181526	0.00327907	0.0247805		0.0289353	0.154356	0.0456368	0.0463274
2015-07-14	12:48:55	00:00:05	118.167	1.96944	26.07	26.079	40.68	47.168	101.343	16.9281	77.6978	187.389								40.9111	87.343	9.0101	32.5641		0.0519269	0.175279	0.00458549	0.0360108		0.0289893	0.154718	0.045578	0.0464758
2015-07-14	12:49:00	00:00:05	118.25	1.97083	26.07	26.0789	40.78	51.5015	101.343	24.9817	71.4661	187.333								45.2446	87.343	17.0637	26.3324		0.0610278	0.175279	0.0127716	0.0256133		0.0290501	0.155175	0.045594	0.0465825
2015-07-14	12:49:05	00:00:05	118.333	1.97222	26.06	26.0788	40.78	51.5015	111.353	47.3755	83.8867	187.278								45.2446	97.353	39.4575	38.753		0.0610278	0.208599	0.0489994	0.0476038		0.0291286	0.155741	0.0456853	0.0467808
2015-07-14	12:49:10	00:00:05	118.417	1.97361	26.06	26.0787	40.84	54.3396	103.271	29.5502	62.4329	187.222								48.0827	89.271	21.6322	17.2992		0.0672836	0.181526	0.0186853	0.0130555		0.0292658	0.156123	0.0457441	0.0468352
2015-07-14	12:49:15	00:00:05	118.5	1.975	26.06	26.0786	40.84	54.3396	111.353	17.6727	60.8276	187.167								48.0827	97.353	9.7547	15.6939		0.0672836	0.208599	0.00520833	0.0111674		0.0294007	0.156704	0.0457345	0.0468818
2015-07-14	12:49:20	00:00:05	118.583	1.97639	26.06	26.0785	40.74	49.7131	115.674	34.3079	82.6111	187.111								43.4562	101.674	26.3899	37.4774		0.057205	0.223647	0.0257031	0.0451155		0.0294866	0.157408	0.0457518	0.0470697
2015-07-14	12:49:25	00:00:05	118.667	1.97778	26.06	26.0783	40.82	53.3691	110.303	38.0005	85.8521	187.056								47.1122	96.303	30.0825	40.7184		0.0651186	0.205002	0.0317114	0.0515352		0.0296171	0.157894	0.0458234	0.0472836
2015-07-14	12:49:30	00:00:05	118.75	1.97917	26.06	26.0782	40.9	57.373	105.225	22.937	74.7925	187								51.1161	91.225	15.019	29.6588		0.0742208	0.187941	0.0104071	0.030998		0.0297898	0.158449	0.0458226	0.0474128
2015-07-14	12:49:35	00:00:05	118.833	1.98056	26.06	26.0781	41.03	64.7217	106.226	28.1494	82.9285	186.944								58.4648	92.226	20.2314	37.7948		0.0920657	0.19126	0.0167828	0.0457299		0.0300411	0.159027	0.0457715	0.0476021
2015-07-14	12:49:40	00:00:05	118.917	1.98194	26.07	26.078	40.95	60.0708	102.295	22.937	76.2329	186.889								53.8139	88.295	15.019	31.0992		0.0806034	0.178353	0.0104071	0.0334479		0.0302507	0.15945	0.0456937	0.0477414
2015-07-14	12:49:45	00:00:05	119	1.98333	26.07	26.0779	40.89	56.8604	120.166	33.1726	86.5173	186.833								50.6035	106.166	25.2546	41.3836		0.0730305	0.239707	0.0239526	0.0528922		0.0304268	0.160191	0.0457432	0.0479308
2015-07-14	12:49:50	00:00:05	119.083	1.98472	26.07	26.0778	40.93	58.9722	114.575	32.8979	62.2009	186.778								52.7153	100.575	24.9799	17.0672		0.0779804	0.219783	0.0235361	0.0127758		0.0306063	0.160902	0.0457861	0.047984
2015-07-14	12:49:55	00:00:05	119.167	1.98611	26.07	26.0777	40.97	61.1938	112.427	35.1868	55.8746	186.722								54.9369	98.427	27.2688	10.7409		0.0833184	0.212302	0.0270899	0.0060784		0.0308272	0.161607	0.0457085	0.0480063
2015-07-14	12:50:00	00:00:05	119.25	1.9875	26.07	26.0777	40.96	60.6323	119.019	30.2856	75.6531	186.667								54.3754	105.019	22.3676	30.5194		0.0819567	0.235566	0.0197146	0.0324533		0.0310385	0.162439	0.0455679	0.048141
2015-07-14	12:50:05	00:00:05	119.333	1.98889	26.07	26.0776	40.93	58.9722	122.485	31.2988	81.665	186.611								52.7153	108.485	23.3808	36.5313		0.0779804	0.24816	0.0211665	0.0433026		0.0312391	0.163297	0.0454753	0.0483214
2015-07-14	12:50:10	00:00:05	119.417	1.99028	26.07	26.0775	40.82	53.3691	114.575	25.7813	71.1975	186.556								47.1122	100.575	17.8633	26.0638		0.0651186	0.219783	0.013745	0.0251956		0.0313842	0.164029	0.0454753	0.0484264
2015-07-14	12:50:15	00:00:05	119.5	1.99167	26.06	26.0774	40.67	46.7651	109.277	28.1494	81.0364	186.5								40.5082	95.277	20.2314	35.9027		0.051109	0.20151	0.0167828	0.0421137		0.0314768	0.164745	0.0454601	0.0486019
2015-07-14	12:50:20	00:00:05	119.583	1.99306	26.06	26.0772	40.76	50.5981	116.772	26.1932	72.0093	186.444								44.3412	102.772	18.2752	26.8756		0.0590851	0.227534	0.0142569	0.0264661		0.0316025	0.165596	0.0454215	0.0487121
2015-07-14	12:50:25	00:00:05	119.667	1.99444	26.06	26.0771	40.79	51.9653	114.575	21.2555	69.0796	186.389								45.7084	100.575	13.3375	23.9459		0.0620344	0.219783	0.00860238	0.0219931		0.0317497	0.166397	0.0454139	0.0487942
2015-07-14	12:50:30	00:00:05	119.75	1.99583	26.06	26.077	40.74	49.7131	114.575	34.3079	93.1213	186.333								43.4562	100.575	26.3899	47.9876		0.057205	0.219783	0.0257031	0.0670703		0.0318449	0.167229	0.0454459	0.0490736
2015-07-14	12:50:35	00:00:05	119.833	1.99722	26.06	26.0769	40.89	56.8604	116.772	42.5659	81.9763	186.278								50.6035	102.772	34.6479	36.8426		0.0730305	0.227534	0.0397778	0.043896		0.0320189	0.168084	0.0455186	0.0492536
2015-07-14	12:50:40	00:00:05	119.917	1.99861	26.06	26.0768	40.72	48.8464	113.501	23.2941	63.1348	186.222								42.5895	99.501	15.3761	18.0011		0.055386	0.21603	0.0108069	0.0139155		0.0321366	0.16888	0.0453921	0.0493115
2015-07-14	12:50:45	00:00:05	120	2	26.06	26.0767	40.64	45.5688	116.772	28.8391	73.1079	186.167								39.3119	102.772	20.9211	27.9742		0.0487097	0.227534	0.0177099	0.0282227		0.0322316	0.169779	0.0453405	0.04942
2015-07-14	12:50:50	00:00:05	120.083	2.00139	26.07	26.0766	40.74	49.7131	119.019	35.4858	73.9441	186.111								43.4562	105.019	27.5678	28.8104		0.057205	0.235566	0.0275679	0.0295881		0.0323495	0.170634	0.0454068	0.0495433
2015-07-14	12:50:55	00:00:05	120.167	2.00278	26.07	26.0765	40.68	47.168	116.772	26.4038	94.5801	186.056								40.9111	102.772	18.4858	49.4464		0.0519269	0.227534	0.0145214	0.0703706		0.0324661	0.171484	0.0453584	0.0498332
2015-07-14	12:51:00	00:00:05	120.25	2.00417	26.06	26.0764	40.68	47.168	115.674	27.9236	91.333	186								40.9111	101.674	20.0056	46.1993		0.0519269	0.223647	0.0164834	0.0631066		0.0325762	0.172345	0.0452828	0.0500889
2015-07-14	12:51:05	00:00:05	120.333	2.00556	26.06	26.0763	40.49	40.1367	113.501	19.0094	103.064	185.944								33.8798	99.501	11.0914	57.9303		0.0383728	0.21603	0.00639967	0.0907194		0.0326156	0.173188	0.0450981	0.0504668
2015-07-14	12:51:10	00:00:05	120.417	2.00694	26.06	26.0762	40.53	41.4978	106.226	32.8979	97.5769	185.889								35.2409	92.226	24.9799	52.4432		0.0408754	0.19126	0.0235361	0.0773358		0.0325275	0.173969	0.0449019	0.0507891
2015-07-14	12:51:15	00:00:05	120.5	2.00833	26.06	26.076	40.45	38.8245	106.226	26.825	102.258	185.833								32.5676	92.226	18.907	57.1243		0.036017	0.19126	0.0150557	0.0887034		0.0323066	0.174738	0.0447174	0.0511578
2015-07-14	12:51:20	00:00:05	120.583	2.00972	26.06	26.0759	40.38	36.6638	119.019	36.7188	75.3662	185.778								30.4069	105.019	28.8008	30.2325		0.0322616	0.235566	0.0295722	0.0319654		0.0320995	0.175695	0.0446467	0.0512599
2015-07-14	12:51:25	00:00:05	120.667	2.01111	26.06	26.0758	40.42	37.8784	116.772	43.7134	67.7887	185.722								31.6215	102.772	35.7954	22.655		0.0343535	0.227534	0.041912	0.0201225		0.0319282	0.17654	0.0447363	0.0513144
2015-07-14	12:51:30	00:00:05	120.75	2.0125	26.06	26.0757	40.33	35.2112	108.252	31.5552	79.4983	185.667								28.9543	94.252	23.6372	34.3646		0.0298254	0.198044	0.0215401	0.0392574		0.031758	0.177269	0.0447049	0.05142
2015-07-14	12:51:35	00:00:05	120.833	2.01389	26.06	26.0757	40.39	36.9629	121.313	30.2856	81.665	185.611								30.706	107.313	22.3676	36.5313		0.0327721	0.243874	0.0197146	0.0433026		0.0316638	0.17823	0.0446242	0.0516005
2015-07-14	12:51:40	00:00:05	120.917	2.01528	26.06	26.0756	40.34	35.4919	112.427	30.2856	115.979	185.556								29.235	98.427	22.3676	70.8453		0.0302905	0.212302	0.0197146	0.125285		0.0315838	0.179061	0.0445671	0.0521069
2015-07-14	12:51:45	00:00:05	121	2.01667	26.06	26.0755	40.29	34.1003	119.019	38.6597	85.8521	185.5								27.8434	105.019	30.7417	40.7184		0.0280113	0.235566	0.0328333	0.0515352		0.0315219	0.179964	0.044552	0.0523216
2015-07-14	12:51:50	00:00:05	121.083	2.01806	26.06	26.0754	40.19	31.5125	120.166	26.4038	92.7612	185.444								25.2556	106.166	18.4858	47.6275		0.0239541	0.239707	0.0145214	0.0662649		0.0314402	0.180913	0.0444524	0.0525977
2015-07-14	12:51:55	00:00:05	121.167	2.01944	26.06	26.0753	40.25	33.0322	117.896	21.579	80.4199	185.389								26.7753	103.896	13.661	35.2862		0.0263078	0.231539	0.0089395	0.0409598		0.0313436	0.181817	0.0441628	0.0527684
2015-07-14	12:52:00	00:00:05	121.25	2.02083	26.06	26.0752	40.18	31.2683	103.271	17.9291	86.1816	185.333								25.0114	89.271	10.0111	41.0479		0.0235837	0.181526	0.00542965	0.0522057		0.031282	0.182549	0.0439382	0.0529859
2015-07-14	12:52:05	00:00:05	121.333	2.02222	26.06	26.075	40.13	30.0812	115.674	35.791	95.3186	185.278								23.8243	101.674	27.873	50.1849		0.0218142	0.223647	0.0280591	0.072064		0.0312026	0.183455	0.0438285	0.0532861
2015-07-14	12:52:10	00:00:05	121.417	2.02361	26.06	26.0749	39.98	26.8463	114.575	24.5941	76.8127	185.222								20.5894	100.575	16.6761	31.679		0.0172617	0.219783	0.0123095	0.0344538		0.0311245	0.184309	0.0436859	0.053428
2015-07-14	12:52:15	00:00:05	121.5	2.025	26.06	26.0748	39.84	24.2188	122.485	38.3301	77.1057	185.167								17.9619	108.485	30.4121	31.972		0.0138669	0.24816	0.0322705	0.0349663		0.0310435	0.185303	0.0434878	0.0535604
2015-07-14	12:52:20	00:00:05	121.583	2.02639	26.06	26.0747	39.9	25.3021	112.427	25.3784	86.1816	185.111								19.0452	98.427	17.4604	41.0479		0.0152326	0.212302	0.0132512	0.0522057		0.0309639	0.186145	0.0432958	0.0537366
2015-07-14	12:52:25	00:00:05	121.667	2.02778	26.06	26.0745	39.89	25.116	117.896	18.1915	73.9441	185.056								18.8591	103.896	10.2735	28.8104		0.0149946	0.231539	0.00565973	0.0295881		0.0308786	0.187022	0.0430589	0.0538449
2015-07-14	12:52:30	00:00:05	121.75	2.02917	26.06	26.0745	40.18	31.2683	110.303	28.8391	80.4199	185								25.0114	96.303	20.9211	35.2862		0.0235837	0.205002	0.0177099	0.0409598		0.030836	0.187864	0.0429488	0.0539993
2015-07-14	12:52:35	00:00:05	121.833	2.03056	26.06	26.0744	39.83	24.0417	124.854	20.0195	61.969	184.944								17.7848	110.854	12.1015	16.8353		0.0136482	0.25691	0.00735992	0.0124985		0.0307606	0.188841	0.0427144	0.0540268
2015-07-14	12:52:40	00:00:05	121.917	2.03194	26.06	26.0743	39.66	21.3013	122.485	21.0968	74.5117	184.889								15.0444	108.485	13.1788	29.378		0.0104354	0.24816	0.00843879	0.0305286		0.0306696	0.189857	0.0425656	0.0541352
2015-07-14	12:52:45	00:00:05	122	2.03333	26.06	26.0742	39.69	21.7529	121.313	18.7317	94.9463	184.833								15.496	107.313	10.8137	49.8126		0.0109423	0.243874	0.00614461	0.0712084		0.0305675	0.190834	0.0424393	0.0544034
2015-07-14	12:52:50	00:00:05	122.083	2.03472	26.06	26.0741	39.74	22.5372	127.271	29.7913	68.3014	184.778								16.2803	113.271	21.8733	23.1677		0.0118442	0.265954	0.0190205	0.020858		0.0304737	0.191775	0.0423693	0.0544335
2015-07-14	12:52:55	00:00:05	122.167	2.03611	26.06	26.074	39.94	26.059	127.271	26.4038	63.8428	184.722								19.8021	113.271	18.4858	18.7091		0.0162152	0.265954	0.0145214	0.0148038		0.0303958	0.192855	0.0422611	0.0543885
2015-07-14	12:53:00	00:00:05	122.25	2.0375	26.06	26.0739	39.94	26.059	115.674	22.0764	59.7107	184.667								19.8021	101.674	14.1584	14.577		0.0162152	0.223647	0.0094673	0.00992027		0.0303571	0.19378	0.0420308	0.0544142
2015-07-14	12:53:05	00:00:05	122.333	2.03889	26.06	26.0738	39.42	18.0756	121.313	16.687	63.6047	184.611								11.8187	107.313	8.769	18.471		0.00708597	0.243874	0.00439027	0.0145027		0.0302605	0.194765	0.0417047	0.0543551
2015-07-14	12:53:10	00:00:05	122.417	2.04028	26.06	26.0738	39.64	21.0052	119.019	20.9381	57.7576	184.556								14.7483	105.019	13.0201	12.6239		0.0101079	0.235566	0.00827638	0.00787615		0.0301877	0.195737	0.0413697	0.054301
2015-07-14	12:53:15	00:00:05	122.5	2.04167	26.06	26.0737	39.73	22.3785	121.313	14.9139	61.969	184.5								16.1216	107.313	6.9959	16.8353		0.0116595	0.243874	0.00305582	0.0124985		0.0301283	0.196734	0.04091	0.0542137
2015-07-14	12:53:20	00:00:05	122.583	2.04306	26.06	26.0736	39.58	20.1477	122.485	22.937	60.1532	184.444								13.8908	108.485	15.019	15.0195		0.00918189	0.24816	0.0104071	0.0104077		0.0300569	0.197756	0.0405775	0.0540251
2015-07-14	12:53:25	00:00:05	122.667	2.04444	26.06	26.0735	39.52	19.3359	128.516	28.1494	67.5354	184.389								13.079	114.516	20.2314	22.4017		0.00833649	0.270658	0.0167828	0.0197629		0.0300049	0.198872	0.0403427	0.053988
2015-07-14	12:53:30	00:00:05	122.75	2.04583	26.06	26.0734	39.55	19.7388	110.303	36.0962	61.7371	184.333								13.4819	96.303	28.1782	16.6034		0.00875223	0.205002	0.0285536	0.0122235		0.0299624	0.199725	0.040105	0.0537918
2015-07-14	12:53:35	00:00:05	122.833	2.04722	26.06	26.0733	39.67	21.4508	111.353	27.2583	54.657	184.278								15.1939	97.353	19.3403	9.52331		0.0106022	0.208599	0.015613	0.00501158		0.0299171	0.200595	0.0398135	0.053516
2015-07-14	12:53:40	00:00:05	122.917	2.04861	26.06	26.0732	39.58	20.1477	123.657	22.2473	58.3984	184.222								13.8908	109.657	14.3293	13.2647		0.00918189	0.252475	0.00965126	0.0085272		0.0298586	0.201642	0.0394778	0.0533283
2015-07-14	12:53:45	00:00:05	123	2.05	26.06	26.073	39.66	21.3013	109.277	15.5502	49.7253	184.167								15.0444	95.277	7.6322	4.59161		0.0104354	0.20151	0.00351374	0.00155522		0.0298054	0.202438	0.0390747	0.0529396
2015-07-14	12:53:50	00:00:05	123.083	2.05139	26.06	26.0729	39.63	20.8588	107.227	17.9291	59.0515	184.111								14.6019	93.227	10.0111	13.9178		0.00994742	0.194601	0.00542965	0.00921058		0.0297653	0.203237	0.0385721	0.0526247
2015-07-14	12:53:55	00:00:05	123.167	2.05278	26.06	26.0728	39.74	22.5372	110.303	42.1875	57.5439	184.056								16.2803	96.303	34.2695	12.4102		0.0118442	0.205002	0.0390833	0.00766339		0.0297223	0.204088	0.0384406	0.0521506
2015-07-14	12:54:00	00:00:05	123.25	2.05417	26.06	26.0728	39.67	21.4508	101.343	32.6233	51.001	184								15.1939	87.343	24.7053	5.86731		0.0106022	0.175279	0.0231225	0.00230449		0.029685	0.204807	0.0382625	0.0516594
2015-07-14	12:54:05	00:00:05	123.333	2.05556	26.06	26.0727	39.61	20.5719	99.4629	45.7031	46.7743	183.944								14.315	85.4629	37.7851	1.64061		0.00963579	0.169266	0.0457111	0.000298447		0.0296627	0.205491	0.038197	0.0513074
2015-07-14	12:54:10	00:00:05	123.417	2.05694	26.06	26.0726	39.78	23.1903	107.227	32.0862	59.491	183.889								16.9334	93.227	24.1682	14.3573		0.0126155	0.194601	0.0223215	0.00968154		0.0296566	0.206302	0.0379631	0.0507924
2015-07-14	12:54:15	00:00:05	123.5	2.05833	26.06	26.0725	39.62	20.7153	99.4629	16.806	58.3984	183.833								14.4584	85.4629	8.888	13.2647		0.00979108	0.169266	0.00448622	0.0085272		0.0296309	0.206992	0.0376124	0.0503579
2015-07-14	12:54:20	00:00:05	123.583	2.05972	26.06	26.0724	39.5	19.0765	107.227	18.5944	52.124	183.778								12.8196	93.227	10.6764	6.99031		0.00807288	0.194601	0.00601995	0.00305191		0.0296111	0.207803	0.0374108	0.0498854
2015-07-14	12:54:25	00:00:05	123.667	2.06111	26.06	26.0723	39.67	21.4508	94.0674	20.0195	43.866	183.722								15.1939	80.0674	12.1015	-1.26769		0.0106022	0.152455	0.00735992	0		0.0295928	0.208405	0.0372477	0.0495707
2015-07-14	12:54:30	00:00:05	123.75	2.0625	26.06	26.0723	39.56	19.873	98.5352	24.4019	55.4657	183.667								13.6161	84.5352	16.4839	10.332		0.00889239	0.166329	0.0120827	0.00571152		0.0295805	0.209098	0.0370507	0.0491585
2015-07-14	12:54:35	00:00:05	123.833	2.06389	26.06	26.0722	39.66	21.3013	103.271	34.3079	53.6682	183.611								15.0444	89.271	26.3899	8.53451		0.0104354	0.181526	0.0257031	0.00420349		0.029573	0.209799	0.036995	0.0485675
2015-07-14	12:54:40	00:00:05	123.917	2.06528	26.06	26.072	39.54	19.603	101.343	24.2126	55.2612	183.556								13.3461	87.343	16.2946	10.1275		0.00861125	0.175279	0.0118609	0.00553128		0.0295547	0.210527	0.0367652	0.0478129
2015-07-14	12:54:45	00:00:05	124	2.06667	26.06	26.072	39.83	24.0417	92.3462	21.4172	49.7253	183.5								17.7848	78.3462	13.4992	4.59161		0.0136482	0.147233	0.00877028	0.00155522		0.0295529	0.21112	0.0365502	0.0467806
2015-07-14	12:54:50	00:00:05	124.083	2.06806	26.06	26.0719	39.93	25.8667	97.6318	34.3079	43.866	183.444								19.6098	83.6318	26.3899	-1.26769		0.0159634	0.163487	0.0257031	0		0.0295685	0.211714	0.0364267	0.0460678
2015-07-14	12:54:55	00:00:05	124.167	2.06944	26.06	26.0718	39.89	25.116	91.4917	27.2583	49.1882	183.389								18.8591	77.4917	19.3403	4.05451		0.0149946	0.144665	0.015613	0.00127389		0.0295846	0.21231	0.0362911	0.0448626
2015-07-14	12:55:00	00:00:05	124.25	2.07083	26.06	26.0717	39.5	19.0765	90.6494	19.0094	61.2793	183.333								12.8196	76.6494	11.0914	16.1456		0.00807288	0.142151	0.00639967	0.0116874		0.0295704	0.212897	0.0360385	0.0437944
2015-07-14	12:55:05	00:00:05	124.333	2.07222	26.06	26.0716	39.69	21.7529	89.0015	19.4336	43.5547	183.278								15.496	75.0015	11.5156	-1.57899		0.0109423	0.137281	0.00679678	0		0.0295718	0.213462	0.0358554	0.0422086
2015-07-14	12:55:10	00:00:05	124.417	2.07361	26.06	26.0715	39.89	25.116	94.0674	20.1691	47.7936	183.222								18.8591	80.0674	12.2511	2.65991		0.0149946	0.152455	0.00750641	0.000647867		0.0295967	0.214085	0.0357613	0.040692
2015-07-14	12:55:15	00:00:05	124.5	2.075	26.06	26.0715	39.52	19.3359	94.9463	29.0741	43.5547	183.167								13.079	80.9463	21.1561	-1.57899		0.00833649	0.155148	0.0180301	0		0.0296004	0.214731	0.0357088	0.0391987
2015-07-14	12:55:20	00:00:05	124.583	2.07639	26.06	26.0714	39.71	22.0642	89.0015	32.3547	46.6064	183.111								15.8073	75.0015	24.4367	1.47271		0.0112971	0.137281	0.0227206	0.000250991		0.0296203	0.21529	0.0356824	0.0379119
2015-07-14	12:55:25	00:00:05	124.667	2.07778	26.06	26.0713	39.74	22.5372	88.1836	30.0354	59.7107	183.056								16.2803	74.1836	22.1174	14.577		0.0118442	0.134888	0.0193621	0.00992027		0.0296381	0.215851	0.0356332	0.0361526
2015-07-14	12:55:30	00:00:05	124.75	2.07917	26.06	26.0712	39.65	21.1517	88.1836	27.478	40.3046	183								14.8948	74.1836	19.56	-4.82909		0.0102694	0.134888	0.0158985	0		0.0296489	0.216395	0.0354917	0.035248
2015-07-14	12:55:35	00:00:05	124.833	2.08056	26.06	26.0711	39.5	19.0765	84.2407	32.3547	49.5453	182.944								12.8196	70.2407	24.4367	4.41161		0.00807288	0.123574	0.0227206	0.00145859		0.0296566	0.216879	0.0354056	0.0344384
2015-07-14	12:55:40	00:00:05	124.917	2.08194	26.06	26.071	39.4	17.8345	86.5845	43.3228	45.4559	182.889								11.5776	72.5845	35.4048	0.322209		0.00685554	0.130255	0.0411808	2.19307e-05		0.0296499	0.217408	0.0354427	0.0328117
2015-07-14	12:55:45	00:00:05	125	2.08333	26.06	26.071	39.41	17.9535	75.5859	38.0005	44.6533	182.833								11.6966	61.5859	30.0825	-0.480391		0.00696891	0.100075	0.0317114	0		0.0296668	0.217811	0.0353521	0.0311143
2015-07-14	12:55:50	00:00:05	125.083	2.08472	26.06	26.071	39.51	19.2047	69.165	40.0269	59.7107	182.778								12.9478	55.165	32.1089	14.577		0.00820276	0.0838741	0.0352068	0.00992027		0.0296819	0.218142	0.0352641	0.0301075
2015-07-14	12:55:55	00:00:05	125.167	2.08611	26.06	26.0709	39.93	25.8667	77.6489	33.7341	34.491	182.722								19.6098	63.6489	25.8161	-10.6427		0.0159634	0.105507	0.0248126	0		0.0297234	0.218577	0.035213	0.0295348
2015-07-14	12:56:00	00:00:05	125.25	2.0875	26.06	26.0708	39.76	22.8607	76.9531	51.4221	45.9442	182.667								16.6038	62.9531	43.5041	0.810509		0.0122239	0.103663	0.0573062	9.63046e-05		0.0297553	0.218968	0.0353711	0.0291223
2015-07-14	12:56:05	00:00:05	125.333	2.08889	26.06	26.0708	39.65	21.1517	79.0649	40.0269	55.0598	182.611								14.8948	65.0649	32.1089	9.92611		0.0102694	0.109297	0.0352068	0.00535591		0.0297783	0.219409	0.035381	0.0287317
2015-07-14	12:56:10	00:00:05	125.417	2.09028	26.06	26.0707	39.56	19.873	78.3569	30.7861	53.0823	182.556								13.6161	64.3569	22.8681	7.94861		0.00889239	0.107395	0.020427	0.0037503		0.0297873	0.219836	0.0350258	0.0283017
2015-07-14	12:56:15	00:00:05	125.5	2.09167	26.06	26.0706	39.81	23.6969	70.3979	37.3535	50.8179	182.5								17.44	56.3979	29.4355	5.68421		0.0132263	0.0869011	0.0306245	0.00219023		0.0298264	0.220175	0.0347571	0.027584
2015-07-14	12:56:20	00:00:05	125.583	2.09306	26.06	26.0705	39.57	20.0104	63.9404	42.9443	61.2793	182.444								13.7535	49.9404	35.0263	16.1456		0.00903676	0.0715017	0.0404769	0.0116874		0.02985	0.220438	0.0345628	0.0267776
2015-07-14	12:56:25	00:00:05	125.667	2.09444	26.06	26.0705	39.56	19.873	65.0635	35.791	45.7825	182.389								13.6161	51.0635	27.873	0.648809		0.00889239	0.0740984	0.0280591	6.73961e-05		0.0298787	0.220743	0.0343292	0.0258302
2015-07-14	12:56:30	00:00:05	125.75	2.09583	26.06	26.0704	39.63	20.8588	66.7847	34.3079	46.4417	182.333								14.6019	52.7847	26.3899	1.30801		0.00994742	0.0781452	0.0257031	0.000207512		0.0299129	0.221015	0.034033	0.0251456
2015-07-14	12:56:35	00:00:05	125.833	2.09722	26.06	26.0703	39.58	20.1477	55.2917	50.0305	50.0854	182.278								13.8908	41.2917	42.1125	4.95171		0.00918189	0.0527039	0.0543944	0.00175544		0.0299407	0.221213	0.0338193	0.0245383
2015-07-14	12:56:40	00:00:05	125.917	2.09861	26.06	26.0703	39.74	22.5372	56.7139	53.3508	35.2066	182.222								16.2803	42.7139	45.4328	-9.92709		0.0118442	0.0556458	0.0614356	0		0.0299796	0.221343	0.0337369	0.0241728
2015-07-14	12:56:45	00:00:05	126	2.1	26.06	26.0702	39.49	18.9468	61.2366	52.3804	46.109	182.167								12.6899	47.2366	44.4624	0.975309		0.00794227	0.0653946	0.0593444	0.000129594		0.0300021	0.221562	0.0337326	0.0234323
2015-07-14	12:56:50	00:00:05	126.083	2.10139	26.06	26.0701	39.45	18.4418	56.2317	38.3301	66.2781	182.111								12.1849	42.2317	30.4121	21.1444		0.00744142	0.0546416	0.0322705	0.0180141		0.0300287	0.221705	0.0335459	0.0223183
2015-07-14	12:56:55	00:00:05	126.167	2.10278	26.06	26.07	39.66	21.3013	49.6216	37.3535	52.6978	182.056								15.0444	35.6216	29.4355	7.56411		0.0104354	0.041586	0.0306245	0.00346359		0.0300643	0.221842	0.033483	0.0215917
2015-07-14	12:57:00	00:00:05	126.25	2.10417	26.06	26.0699	39.42	18.0756	61.2366	46.9482	54.8584	182								11.8187	47.2366	39.0302	9.72471		0.00708597	0.0653946	0.0481511	0.00518267		0.0300848	0.222057	0.0334449	0.0208722
2015-07-14	12:57:05	00:00:05	126.333	2.10556	26.05	26.0698	39.43	18.1961	46.8628	44.8914	47.6196	181.944								11.9392	32.8628	36.9734	2.48591		0.00720221	0.0365421	0.0441463	0.000581243		0.0301055	0.222092	0.0334022	0.0204479
2015-07-14	12:57:10	00:00:05	126.417	2.10694	26.05	26.0697	39.44	18.3182	58.667	37.0361	46.7743	181.889								12.0613	44.667	29.1181	1.64061		0.00732072	0.0597831	0.0300966	0.000298447		0.0301287	0.222202	0.0332383	0.0202172
2015-07-14	12:57:15	00:00:05	126.5	2.10833	26.06	26.0696	39.56	19.873	44.2932	45.7031	54.0619	181.833								13.6161	30.2932	37.7851	8.92821		0.00889239	0.0320684	0.0457111	0.00451882		0.0301621	0.222255	0.0331773	0.0194047
2015-07-14	12:57:20	00:00:05	126.583	2.10972	26.06	26.0695	39.27	16.3727	41.5649	34.8877	59.0515	181.778								10.1158	27.5649	26.9697	13.9178		0.005521	0.0275633	0.0266149	0.00921058		0.0301827	0.22213	0.0331253	0.0192818
2015-07-14	12:57:25	00:00:05	126.667	2.11111	26.06	26.0694	39.66	21.3013	54.8279	34.5947	49.3683	181.722								15.0444	40.8279	26.6767	4.23461		0.0104354	0.0517576	0.0261526	0.00136587		0.0302236	0.22213	0.0330337	0.0191736
2015-07-14	12:57:30	00:00:05	126.75	2.1125	26.06	26.0693	39.43	18.1961	53.9185	53.3508	54.0619	181.667								11.9392	39.9185	45.4328	8.92821		0.00720221	0.0499209	0.0614356	0.00451882		0.0302474	0.222106	0.033115	0.0191202
2015-07-14	12:57:35	00:00:05	126.833	2.11389	26.06	26.0693	39.25	16.1606	34.2834	69.5679	38.382	181.611								9.90367	20.2834	61.6499	-6.75169		0.0053365	0.0168521	0.100242	0		0.03026	0.22194	0.0333138	0.0189322
2015-07-14	12:57:40	00:00:05	126.917	2.11528	26.06	26.0692	39.36	17.3676	46.8628	63.7817	58.3984	181.556								11.1107	32.8628	55.8637	13.2647		0.00641751	0.0365421	0.0855845	0.0085272		0.0302814	0.221847	0.0334799	0.0188242
2015-07-14	12:57:45	00:00:05	127	2.11667	26.06	26.0691	39.22	15.8508	47.2473	56.4087	56.9092	181.5								9.59387	33.2473	48.4907	11.7755		0.00507128	0.0372303	0.0682017	0.00704451		0.0302967	0.221641	0.0336224	0.0187955
2015-07-14	12:57:50	00:00:05	127.083	2.11806	26.06	26.069	39.02	13.9648	39.9658	56.9458	49.0112	181.444								7.70787	25.9658	49.0278	3.87751		0.00356978	0.0250438	0.0694175	0.00118587		0.030297	0.221342	0.0337675	0.0187211
2015-07-14	12:57:55	00:00:05	127.167	2.11944	26.06	26.0689	39.01	13.8794	38.739	55.8838	49.3683	181.389								7.62247	24.739	47.9658	4.23461		0.00350656	0.0231731	0.0670214	0.00136587		0.0302992	0.221107	0.0337907	0.0186824
2015-07-14	12:58:00	00:00:05	127.25	2.12083	26.06	26.0688	39.01	13.8794	48.0225	49.5728	62.6648	181.333								7.62247	34.0225	41.6548	17.5311		0.00350656	0.0386325	0.0534493	0.0133374		0.0302896	0.220805	0.0337907	0.018624
2015-07-14	12:58:05	00:00:05	127.333	2.12222	26.06	26.0688	39.16	15.2527	37.851	46.5332	60.8276	181.278								8.99577	23.851	38.6152	15.6939		0.0045738	0.0218534	0.0473325	0.0111674		0.0302857	0.220416	0.0336779	0.0181152
2015-07-14	12:58:10	00:00:05	127.417	2.12361	26.06	26.0687	39.12	14.8697	37.561	35.1868	36.8195	181.222								8.61277	23.561	27.2688	-8.31419		0.00426548	0.0214288	0.0270899	0		0.0302772	0.219923	0.0335601	0.0179607
2015-07-14	12:58:15	00:00:05	127.5	2.125	26.06	26.0686	39.5	19.0765	38.147	42.5659	47.2809	181.167								12.8196	24.147	34.6479	2.14721		0.00807288	0.0222901	0.0397778	0.000459543		0.030293	0.219402	0.0335217	0.0177721
2015-07-14	12:58:20	00:00:05	127.583	2.12639	26.06	26.0685	38.91	13.0508	33.7708	42.9443	56.2866	181.111								6.79387	19.7708	35.0263	11.1529		0.00291552	0.0161742	0.0404769	0.00645669		0.0302771	0.218765	0.0334677	0.0176422
2015-07-14	12:58:25	00:00:05	127.667	2.12778	26.06	26.0684	38.87	12.7365	31.5918	48.2422	43.2495	181.056								6.47957	17.5918	40.3242	-1.88419		0.00270221	0.0134115	0.0507372	0		0.0302558	0.218115	0.0334784	0.0175599
2015-07-14	12:58:30	00:00:05	127.75	2.12917	26.06	26.0683	39.04	14.1403	24.9634	55.3711	44.6533	181								7.88337	10.9634	47.4531	-0.480391		0.00370105	0.00628162	0.0658761	0		0.0302311	0.217358	0.0334587	0.017493
2015-07-14	12:58:35	00:00:05	127.833	2.13056	26.06	26.0683	38.81	12.2833	34.8022	59.6802	51.1871	180.944								6.02637	20.8022	51.7622	6.05341		0.00240552	0.0175488	0.0757314	0.00242285		0.030186	0.216577	0.0335476	0.0174099
2015-07-14	12:58:40	00:00:05	127.917	2.13194	26.06	26.0682	39.01	13.8794	35.8765	56.4087	53.4729	180.889								7.62247	21.8765	48.4907	8.33921		0.00350656	0.019025	0.0682017	0.00405027		0.0301571	0.215802	0.0336166	0.0174099
2015-07-14	12:58:45	00:00:05	128	2.13333	26.06	26.0681	38.79	12.1384	29.5807	54.8584	48.4863	180.833								5.88147	15.5807	46.9404	3.35261		0.00231342	0.0110385	0.0647382	0.000939104		0.0301125	0.214948	0.0336558	0.0173673
2015-07-14	12:58:50	00:00:05	128.083	2.13472	26.06	26.068	38.77	11.9934	31.8237	55.3711	40.7318	180.778								5.73647	17.8237	47.4531	-4.40189		0.00222262	0.0136962	0.0658761	0		0.0300658	0.214236	0.0337494	0.0173175
2015-07-14	12:58:55	00:00:05	128.167	2.13611	26.05	26.0679	38.96	13.4567	27.7313	50.0305	45.7825	180.722								7.19977	13.7313	42.1125	0.648809		0.00319991	0.0090134	0.0543944	6.73961e-05		0.030032	0.213462	0.0338103	0.01731
2015-07-14	12:59:00	00:00:05	128.25	2.1375	26.06	26.0678	39.08	14.4989	34.8022	56.4087	52.5085	180.667								8.24197	20.8022	48.4907	7.37481		0.00397478	0.0175488	0.0682017	0.00332561		0.0300133	0.212571	0.0338248	0.0173233
2015-07-14	12:59:05	00:00:05	128.333	2.13889	26.06	26.0677	38.95	13.3743	31.5918	54.8584	45.6177	180.611								7.11737	17.5918	46.9404	0.484009		0.00314138	0.0134115	0.0647382	4.21215e-05		0.029977	0.211575	0.0338973	0.0172427
2015-07-14	12:59:10	00:00:05	128.417	2.14028	26.05	26.0676	38.94	13.2919	27.3407	50.4883	53.4729	180.556								7.03497	13.3407	42.5703	8.33921		0.00308324	0.00860569	0.055346	0.00405027		0.0299212	0.210576	0.0339307	0.0172342
2015-07-14	12:59:15	00:00:05	128.5	2.14167	26.05	26.0675	38.73	11.7126	32.782	53.3508	39.7446	180.5								5.45567	18.782	45.4328	-5.38909		0.00205071	0.0148964	0.0614356	0		0.0298611	0.209471	0.0339307	0.017162
2015-07-14	12:59:20	00:00:05	128.583	2.14306	26.06	26.0674	38.46	10.0174	28.5339	60.2539	65.0482	180.444								3.76047	14.5339	52.3359	19.9145		0.00112898	0.00987325	0.0770822	0.0163632		0.0297881	0.208365	0.0340131	0.0171685
2015-07-14	12:59:25	00:00:05	128.667	2.14444	26.06	26.0673	38.2	8.67157	24.1211	53.8452	26.5717	180.389								2.41464	10.1211	45.9272	-18.562		0.000554746	0.00552566	0.0625114	0		0.0296936	0.207137	0.0340085	0.0170891
2015-07-14	12:59:30	00:00:05	128.75	2.14583	26.06	26.0673	38.24	8.8623	42.9016	62.5854	44.0216	180.333								2.60537	28.9016	54.6674	-1.11209		0.000626691	0.0297384	0.0826639	0		0.029622	0.206152	0.0339567	0.017058
2015-07-14	12:59:35	00:00:05	128.833	2.14722	26.06	26.0672	39.13	14.9643	29.7974	64.4043	39.3311	180.278								8.70737	15.7974	56.4863	-5.80259		0.00434088	0.0112858	0.0871196	0		0.0295671	0.204926	0.0339503	0.0170013
2015-07-14	12:59:40	00:00:05	128.917	2.14861	26.06	26.0671	38.88	12.8143	20.6772	48.2422	50.0854	180.222								6.55737	6.6772	40.3242	4.95171		0.00275444	0.00283562	0.0507372	0.00175544		0.0294971	0.203751	0.0339465	0.0168774
2015-07-14	12:59:45	00:00:05	129	2.15	26.06	26.067	38.37	9.52301	29.5807	44.0979	49.5453	180.167								3.26608	15.5807	36.1799	4.41161		0.00090053	0.0110385	0.0426364	0.00145859		0.0293664	0.202524	0.0339434	0.0166395
2015-07-14	12:59:50	00:00:05	129.083	2.15139	26.06	26.0669	38.68	11.3724	18.0664	32.8979	46.6064	180.111								5.11547	4.0664	24.9799	1.47271		0.00184949	0.00127989	0.0235361	0.000250991		0.02929	0.201067	0.0338264	0.016634
2015-07-14	12:59:55	00:00:05	129.167	2.15278	26.06	26.0668	38.83	12.4329	28.5339	34.3079	57.1228	180.056								6.17597	14.5339	26.3899	11.9891		0.00250202	0.00987325	0.0257031	0.00725059		0.0292239	0.199622	0.0337495	0.0166365
2015-07-14	13:00:00	00:00:05	129.25	2.15417	26.06	26.0668	38.78	12.0651	15.7684	44.8914	53.8635	180								5.80817	1.7684	36.9734	8.72981		0.00226735	0.000336603	0.0441463	0.00435884		0.0291765	0.198259	0.0336066	0.0166236
2015-07-14	13:00:05	00:00:05	129.333	2.15556	26.06	26.0667	39.06	14.3188	41.5649	51.8921	53.4729	179.944								8.06187	27.5649	43.9741	8.33921		0.00383639	0.0275633	0.0583025	0.00405027		0.0291423	0.196938	0.0334736	0.0166369
2015-07-14	13:00:10	00:00:05	129.417	2.15694	26.06	26.0666	38.14	8.39386	38.739	51.8921	49.7253	179.889								2.13693	24.739	43.9741	4.59161		0.000456019	0.0231731	0.0583025	0.00155522		0.0290615	0.195887	0.0334977	0.0165626
2015-07-14	13:00:15	00:00:05	129.5	2.15833	26.06	26.0665	38.3	9.15985	24.6216	44.0979	25.8865	179.833								2.90292	10.6216	36.1799	-19.2472		0.000745395	0.00597046	0.0426364	0		0.0289915	0.194682	0.0333706	0.0164756
2015-07-14	13:00:20	00:00:05	129.583	2.15972	26.06	26.0664	38.23	8.81424	30.4535	46.5332	35.9406	179.778								2.55731	16.4535	38.6152	-9.19309		0.000608252	0.012047	0.0473325	0		0.0289187	0.193296	0.0332785	0.0164629
2015-07-14	13:00:25	00:00:05	129.667	2.16111	26.06	26.0664	38.33	9.3132	43.9392	50.4883	59.7107	179.722								3.05627	29.9392	42.5703	14.577		0.000809556	0.0314694	0.055346	0.00992027		0.028849	0.192279	0.0333345	0.0164374
2015-07-14	13:00:30	00:00:05	129.75	2.1625	26.06	26.0663	38.83	12.4329	25.8453	61.4014	37.9852	179.667								6.17597	11.8453	53.4834	-7.14849		0.00250202	0.0071116	0.079811	0		0.0287727	0.190945	0.0335254	0.0164224
2015-07-14	13:00:35	00:00:05	129.833	2.16389	26.06	26.0663	38.15	8.43964	24.9634	70.9351	43.7103	179.611								2.18271	10.9634	63.0171	-1.42339		0.00047179	0.00628162	0.103832	0		0.0286733	0.18951	0.0338282	0.0164224
2015-07-14	13:00:40	00:00:05	129.917	2.16528	26.06	26.0662	38.16	8.48541	26.9592	66.2842	52.89	179.556								2.22848	12.9592	58.3662	7.75631		0.000487759	0.00821438	0.0918168	0.00360584		0.0285739	0.188156	0.0339592	0.0164151
2015-07-14	13:00:45	00:00:05	130	2.16667	26.06	26.0661	38.73	11.7126	22.8455	45.2942	37.0728	179.5								5.45567	8.8455	37.3762	-8.06089		0.00205071	0.00445187	0.0449202	0		0.0284728	0.186857	0.0339863	0.0163874
2015-07-14	13:00:50	00:00:05	130.083	2.16806	26.06	26.066	37.85	7.20291	17.2913	52.3804	37.2025	179.444								0.94598	3.2913	44.4624	-7.93119		0.0001234	0.00091171	0.0593444	0		0.028341	0.185497	0.0340329	0.0163306
2015-07-14	13:00:55	00:00:05	130.167	2.16944	26.06	26.0659	37.98	7.70798	24.6216	50.0305	30.2292	179.389								1.45105	10.6216	42.1125	-14.9045		0.000245097	0.00597046	0.0543944	0		0.0282374	0.18406	0.0341447	0.0163306
2015-07-14	13:01:00	00:00:05	130.25	2.17083	26.06	26.0658	38.3	9.15985	36.1511	57.4768	40.7318	179.333								2.90292	22.1511	49.5588	-4.40189		0.000745395	0.0194095	0.0706274	0		0.0280974	0.182932	0.0342084	0.0162969
2015-07-14	13:01:05	00:00:05	130.333	2.17222	26.06	26.0658	38.17	8.53119	21.6553	56.9458	56.7017	179.278								2.27426	7.6553	49.0278	11.568		0.000503931	0.00353081	0.0694175	0.00684646		0.0279541	0.181652	0.0343319	0.0163254
2015-07-14	13:01:10	00:00:05	130.417	2.17361	26.06	26.0657	38.69	11.4395	16.0599	48.2422	35.6934	179.222								5.18257	2.0599	40.3242	-9.44029		0.00188856	0.000429941	0.0507372	0		0.0278046	0.180266	0.0343561	0.0163254
2015-07-14	13:01:15	00:00:05	130.5	2.175	26.06	26.0656	38.37	9.52301	30.6763	56.4087	54.2603	179.167								3.26608	16.6763	48.4907	9.12661		0.00090053	0.0123097	0.0682017	0.00468097		0.0276535	0.178977	0.0345058	0.0163233
2015-07-14	13:01:20	00:00:05	130.583	2.17639	26.06	26.0655	38.39	9.62982	22.2382	52.3804	51.1871	179.111								3.37289	8.2382	44.4624	6.05341		0.000948232	0.00397186	0.0593444	0.00242285		0.027473	0.177904	0.0345903	0.0163334
2015-07-14	13:01:25	00:00:05	130.667	2.17778	26.06	26.0655	38.25	8.91113	20.813	56.9458	30.1285	179.056								2.6542	6.813	49.0278	-15.0052		0.000645638	0.00292869	0.0694175	0		0.0272971	0.176789	0.034628	0.016327
2015-07-14	13:01:30	00:00:05	130.75	2.17917	26.06	26.0654	38.39	9.62982	34.0271	49.5728	37.3322	179								3.37289	20.0271	41.6548	-7.80149		0.000948232	0.0165118	0.0534493	0		0.0271196	0.175805	0.0345123	0.0162976
2015-07-14	13:01:35	00:00:05	130.833	2.18056	26.06	26.0653	38.03	7.91473	17.7277	54.8584	47.6196	178.944								1.6578	3.7277	46.9404	2.48591		0.000303479	0.00111324	0.0647382	0.000581243		0.0269274	0.174662	0.0346938	0.0162996
2015-07-14	13:01:40	00:00:05	130.917	2.18194	26.06	26.0653	38.25	8.91113	31.8237	63.1836	43.0939	178.889								2.6542	17.8237	55.2656	-2.03979		0.000645638	0.0136962	0.0841195	0		0.0267651	0.173611	0.0349334	0.0162743
2015-07-14	13:01:45	00:00:05	131	2.18333	26.06	26.0652	37.32	5.53207	27.3407	63.7817	45.1324	178.833								-0.72486	13.3407	55.8637	-0.00129091		0	0.00860569	0.0855845	0		0.0265777	0.172439	0.0351381	0.0162743
2015-07-14	13:01:50	00:00:05	131.083	2.18472	26.06	26.0651	38.94	13.2919	21.7987	64.4043	35.5713	178.778								7.03497	7.7987	56.4863	-9.56239		0.00308324	0.0036375	0.0871196	0		0.0263707	0.171472	0.035341	0.0162743
2015-07-14	13:01:55	00:00:05	131.167	2.18611	26.06	26.0651	38.03	7.91473	33.0261	52.3804	28.006	178.722								1.6578	19.0261	44.4624	-17.1277		0.000303479	0.0152081	0.0593444	0		0.0261722	0.170428	0.035341	0.0162561
2015-07-14	13:02:00	00:00:05	131.25	2.1875	26.06	26.065	38.83	12.4329	21.228	65.0269	29.335	178.667								6.17597	7.228	57.1089	-15.7987		0.00250202	0.00322006	0.088665	0		0.0259628	0.169509	0.0355559	0.016246
2015-07-14	13:02:05	00:00:05	131.333	2.18889	26.06	26.065	37.85	7.20291	35.6018	51.4221	34.7275	178.611								0.94598	21.6018	43.5041	-10.4062		0.0001234	0.0186432	0.0573062	0		0.0257759	0.168479	0.0356231	0.0162285
2015-07-14	13:02:10	00:00:05	131.417	2.19028	26.06	26.0649	37.87	7.27768	24.9634	62.5854	49.3683	178.556								1.02075	10.9634	54.6674	4.23461		0.000139414	0.00628162	0.0826639	0.00136587		0.025553	0.167506	0.0359013	0.0162167
2015-07-14	13:02:15	00:00:05	131.5	2.19167	26.06	26.0648	38.11	8.25958	20.813	60.2539	40.3046	178.5								2.00265	6.813	52.3359	-4.82909		0.000410936	0.00292869	0.0770822	0		0.0253418	0.166537	0.0360808	0.0162137
2015-07-14	13:02:20	00:00:05	131.583	2.19306	26.06	26.0648	38.37	9.52301	43.5913	63.1836	63.6047	178.444								3.26608	29.5913	55.2656	18.471		0.00090053	0.0308849	0.0841195	0.0145027		0.0251426	0.165457	0.0362408	0.0162739
2015-07-14	13:02:25	00:00:05	131.667	2.19444	26.06	26.0647	38.95	13.3743	17.8406	78.2593	51.1871	178.389								7.11737	3.8406	70.3413	6.05341		0.00314138	0.00116782	0.123858	0.00242285		0.0249527	0.164353	0.0366248	0.0162602
2015-07-14	13:02:30	00:00:05	131.75	2.19583	26.06	26.0646	38.07	8.08487	21.0892	73.0469	42.1906	178.333								1.82794	7.0892	65.1289	-2.94309		0.000354966	0.00312146	0.109469	0		0.024708	0.163115	0.0368336	0.0162379
2015-07-14	13:02:35	00:00:05	131.833	2.19722	26.06	26.0645	38.31	9.21021	30.2307	57.4768	30.1285	178.278								2.95328	16.2307	49.5588	-15.0052		0.000766245	0.0117864	0.0706274	0		0.0244878	0.162112	0.0369935	0.0162155
2015-07-14	13:02:40	00:00:05	131.917	2.19861	26.06	26.0645	37.93	7.50885	19.8853	54.8584	46.2738	178.222								1.25192	5.8853	46.9404	1.14011		0.000193425	0.00231584	0.0647382	0.000166472		0.0242424	0.161123	0.0371165	0.0161769
2015-07-14	13:02:45	00:00:05	132	2.2	26.06	26.0645	37.92	7.46918	22.2382	50.0305	37.7228	178.167								1.21225	8.2382	42.1125	-7.41089		0.000183688	0.00397186	0.0543944	0		0.0240528	0.160069	0.0371912	0.0161546
2015-07-14	13:02:50	00:00:05	132.083	2.20139	26.06	26.0644	38.01	7.83081	36.9873	52.8564	47.7936	178.111								1.57388	22.9873	44.9384	2.65991		0.000279217	0.020598	0.0603668	0.000647867		0.0238695	0.159085	0.0372556	0.016047
2015-07-14	13:02:55	00:00:05	132.167	2.20278	26.06	26.0644	37.86	7.2403	22.0917	58.02	52.6978	178.056								0.98337	8.0917	50.102	7.56411		0.000131316	0.00385918	0.0718732	0.00346359		0.0236393	0.15803	0.0373835	0.0160376
2015-07-14	13:03:00	00:00:05	132.25	2.20417	26.06	26.0643	38.05	7.99866	26.3947	65.6494	55.8746	178								1.74173	12.3947	57.7314	10.7409		0.000328498	0.00764803	0.0902203	0.0060784		0.0234472	0.15701	0.0376226	0.0159961
2015-07-14	13:03:05	00:00:05	132.333	2.20556	26.06	26.0642	38.17	8.53119	20.9503	72.3389	51.7487	177.944								2.27426	6.9503	64.4209	6.61501		0.000503931	0.00302394	0.107567	0.00279338		0.0232364	0.156075	0.0379291	0.0159254
2015-07-14	13:03:10	00:00:05	132.417	2.20694	26.06	26.0642	38.77	11.9934	39.3433	63.7817	55.6702	177.889								5.73647	25.3433	55.8637	10.5365		0.00222262	0.0240877	0.0855845	0.00589393		0.0230258	0.154987	0.03812	0.0159378
2015-07-14	13:03:15	00:00:05	132.5	2.20833	26.06	26.0641	37.92	7.46918	35.8765	56.9458	61.0535	177.833								1.21225	21.8765	49.0278	15.9198		0.000183688	0.019025	0.0694175	0.0114264		0.0228136	0.153996	0.0382547	0.0159224
2015-07-14	13:03:20	00:00:05	132.583	2.20972	26.06	26.064	37.94	7.54776	37.561	64.4043	47.6196	177.778								1.29083	23.561	56.4863	2.48591		0.000203158	0.0214288	0.0871196	0.000581243		0.02263	0.153069	0.0384025	0.0159249
2015-07-14	13:03:25	00:00:05	132.667	2.21111	26.06	26.064	38.29	9.1095	24.9634	62.5854	48.3093	177.722								2.85257	10.9634	54.6674	3.17561		0.000724767	0.00628162	0.0826639	0.000860855		0.0224572	0.151987	0.0385598	0.0158861
2015-07-14	13:03:30	00:00:05	132.75	2.2125	26.06	26.064	38.19	8.62427	18.1808	61.9873	62.2009	177.667								2.36734	4.1808	54.0693	17.0672		0.000537419	0.00133813	0.081218	0.0127758		0.022266	0.150923	0.0388001	0.0159163
2015-07-14	13:03:35	00:00:05	132.833	2.21389	26.06	26.0639	38.68	11.3724	29.3701	65.6494	64.8071	177.611								5.11547	15.3701	57.7314	19.6734		0.00184949	0.0108001	0.0902203	0.0160466		0.0221006	0.14982	0.0389534	0.0159521
2015-07-14	13:03:40	00:00:05	132.917	2.21528	26.06	26.0638	37.72	6.73904	38.147	56.9458	63.8428	177.556								0.48211	24.147	49.0278	18.7091		4.18567e-05	0.0222901	0.0694175	0.0148038		0.0219042	0.148879	0.039012	0.0159401
2015-07-14	13:03:45	00:00:05	133	2.21667	26.06	26.0638	37.96	7.62787	32.2968	48.2422	72.0093	177.5								1.37094	18.2968	40.3242	26.8756		0.000223757	0.014284	0.0507372	0.0264661		0.0217054	0.14783	0.0390889	0.0159995
2015-07-14	13:03:50	00:00:05	133.083	2.21806	26.06	26.0637	38.07	8.08487	39.6545	53.3508	72.2839	177.444								1.82794	25.6545	45.4328	27.1502		0.000354966	0.0245639	0.0614356	0.0269012		0.0215393	0.146592	0.0391578	0.0160959
2015-07-14	13:03:55	00:00:05	133.167	2.21944	26.06	26.0636	37.67	6.5712	45.7397	46.9482	74.7925	177.389								0.31427	31.7397	39.0302	29.6588		2.10704e-05	0.0345597	0.0481511	0.030998		0.0213608	0.145737	0.0392586	0.0161796
2015-07-14	13:04:00	00:00:05	133.25	2.22083	26.06	26.0635	37.83	7.12891	51.2878	55.3711	80.4199	177.333								0.87198	37.2878	47.4531	35.2862		0.000108286	0.0447499	0.0658761	0.0409598		0.0211615	0.144736	0.0392438	0.0163334
2015-07-14	13:04:05	00:00:05	133.333	2.22222	26.06	26.0634	37.92	7.46918	31.3599	60.8276	81.665	177.278								1.21225	17.3599	52.9096	36.5313		0.000183688	0.013129	0.078442	0.0433026		0.0209779	0.143496	0.0394049	0.0164285
2015-07-14	13:04:10	00:00:05	133.417	2.22361	26.06	26.0633	37.92	7.46918	28.1311	55.8838	85.8521	177.222								1.21225	14.1311	47.9658	40.7184		0.000183688	0.00943803	0.0670214	0.0515352		0.0208262	0.142147	0.0393573	0.0166179
2015-07-14	13:04:15	00:00:05	133.5	2.225	26.06	26.0633	38.14	8.39386	35.6018	56.4087	80.7251	177.167								2.13693	21.6018	48.4907	35.5914		0.000456019	0.0186432	0.0682017	0.0415295		0.0206604	0.140952	0.0394576	0.0167366
2015-07-14	13:04:20	00:00:05	133.583	2.22639	26.06	26.0632	38.27	9.00955	23.3124	55.8838	96.4417	177.111								2.75262	9.3124	47.9658	51.308		0.000684467	0.00483475	0.0670214	0.0746683		0.0205108	0.14004	0.0395768	0.0170338
2015-07-14	13:04:25	00:00:05	133.667	2.22778	26.06	26.0631	38.18	8.57773	21.7987	52.8564	93.4814	177.056								2.3208	7.7987	44.9384	48.3477		0.000520574	0.0036375	0.0603668	0.0678794		0.0203605	0.138928	0.0397353	0.0172985
2015-07-14	13:04:30	00:00:05	133.75	2.22917	26.06	26.0631	38.31	9.21021	17.9535	64.4043	101.465	177								2.95328	3.9535	56.4863	56.3313		0.000766245	0.00122337	0.0871196	0.0867365		0.0202314	0.137615	0.0399541	0.0176482
2015-07-14	13:04:35	00:00:05	133.833	2.23056	26.06	26.063	38.35	9.41772	34.2834	52.3804	115.07	176.944								3.16079	20.2834	44.4624	69.9363		0.00085442	0.0168521	0.0593444	0.122716		0.0200872	0.136737	0.0400961	0.0181372
2015-07-14	13:04:40	00:00:05	133.917	2.23194	26.06	26.063	38.05	7.99866	15.1184	72.3389	111.493	176.889								1.74173	1.1184	64.4209	66.3593		0.000328498	0.000161417	0.107567	0.112805		0.0199477	0.135686	0.0404546	0.0185787
2015-07-14	13:04:45	00:00:05	134	2.23333	26.06	26.0629	38.4	9.68399	20.5414	60.2539	114.166	176.833								3.42706	6.5414	52.3359	69.0323		0.000972778	0.00274369	0.0770822	0.120182		0.0198173	0.134489	0.0406341	0.0190476
2015-07-14	13:04:50	00:00:05	134.083	2.23472	26.06	26.0628	37.64	6.47278	13.3636	56.9458	138.147	176.778								0.21585	-0.6364	49.0278	93.0133		1.1534e-05	0	0.0694175	0.193886		0.0196697	0.133418	0.0406718	0.0198208
2015-07-14	13:04:55	00:00:05	134.167	2.23611	26.06	26.0627	38.29	9.1095	19.7571	51.8921	144.36	176.722								2.85257	5.7571	43.9741	99.2263		0.000724767	0.00223546	0.0583025	0.215074		0.0195249	0.132411	0.0407848	0.0206578
2015-07-14	13:05:00	00:00:05	134.25	2.2375	26.06	26.0626	38.11	8.25958	17.9535	47.8088	140.381	176.667								2.00265	3.9535	39.8908	95.2473		0.000410936	0.00122337	0.0498654	0.201409		0.0193922	0.131165	0.0408996	0.0214247
2015-07-14	13:05:05	00:00:05	134.333	2.23889	26.06	26.0625	38.08	8.12836	12.1994	43.7134	118.768	176.611								1.87143	-1.8006	35.7954	73.6343		0.000368609	0	0.041912	0.13329		0.0192484	0.129488	0.0409223	0.0219119
2015-07-14	13:05:10	00:00:05	134.417	2.24028	26.06	26.0625	37.83	7.12891	19.3771	51.8921	127.563	176.556								0.87198	5.3771	43.9741	82.4293		0.000108286	0.00200354	0.0583025	0.159733		0.0191011	0.128133	0.0410236	0.022481
2015-07-14	13:05:15	00:00:05	134.5	2.24167	26.06	26.0624	38.25	8.91113	38.4399	59.6802	114.618	176.5								2.6542	24.4399	51.7622	69.4843		0.000645638	0.0227254	0.0757314	0.121447		0.0189694	0.12691	0.0411791	0.0228618
2015-07-14	13:05:20	00:00:05	134.583	2.24306	26.06	26.0623	38.4	9.68399	15.1184	68.8965	117.834	176.444								3.42706	1.1184	60.9785	72.7003		0.000972778	0.000161417	0.0984969	0.130588		0.0188432	0.125317	0.0414965	0.0233111
2015-07-14	13:05:25	00:00:05	134.667	2.24444	26.06	26.0622	37.96	7.62787	20.4086	58.02	158.96	176.389								1.37094	6.4086	50.102	113.826		0.000223757	0.0026549	0.0718732	0.268048		0.018694	0.123892	0.0417332	0.0244193
2015-07-14	13:05:30	00:00:05	134.75	2.24583	26.06	26.0621	38.14	8.39386	26.5808	55.3711	137.598	176.333								2.13693	12.5808	47.4531	92.4643		0.000456019	0.00783306	0.0658761	0.192053		0.0185636	0.122673	0.041861	0.0251513
2015-07-14	13:05:35	00:00:05	134.833	2.24722	26.06	26.062	38.21	8.71887	23.9563	54.8584	100.671	176.278								2.46194	9.9563	46.9404	55.5373		0.00057228	0.00538206	0.0647382	0.0847839		0.0184206	0.121234	0.0420179	0.0253794
2015-07-14	13:05:40	00:00:05	134.917	2.24861	26.06	26.062	38.52	10.3653	35.3333	60.8276	103.876	176.222								4.10837	21.3333	52.9096	58.7423		0.00130114	0.0182729	0.078442	0.0927677		0.0182937	0.119993	0.0421181	0.0257172
2015-07-14	13:05:45	00:00:05	135	2.25	26.06	26.0619	38.61	10.9169	39.0381	59.6802	106.769	176.167								4.65997	25.0381	51.7622	61.6353		0.00159252	0.0236241	0.0757314	0.100204		0.0181594	0.118882	0.0422649	0.0261109
2015-07-14	13:05:50	00:00:05	135.083	2.25139	26.06	26.0618	38.55	10.5453	34.5428	66.2842	105.518	176.111								4.28837	20.5428	58.3662	60.3843		0.00139379	0.0171991	0.0918168	0.096962		0.0180266	0.117492	0.0425177	0.0264821
2015-07-14	13:05:55	00:00:05	135.167	2.25278	26.06	26.0617	38.48	10.1318	28.3325	63.7817	108.459	176.056								3.87487	14.3325	55.8637	63.3253		0.00118458	0.00965472	0.0855845	0.104648		0.0178861	0.116169	0.0427796	0.0269049
2015-07-14	13:06:00	00:00:05	135.25	2.25417	26.06	26.0617	39.16	15.2527	31.5918	52.3804	125.549	176								8.99577	17.5918	44.4624	80.4153		0.0045738	0.0134115	0.0593444	0.153519		0.0177728	0.115057	0.0427476	0.0275032
2015-07-14	13:06:05	00:00:05	135.333	2.25556	26.06	26.0616	39	13.7924	26.2085	57.4768	119.238	175.944								7.53547	12.2085	49.5588	74.1043		0.00344258	0.00746458	0.0706274	0.134657		0.0176485	0.113941	0.042927	0.0279789
2015-07-14	13:06:10	00:00:05	135.417	2.25694	26.06	26.0616	38.93	13.2111	35.0677	48.6816	102.258	175.889								6.95417	21.0677	40.7636	57.1243		0.00302664	0.0179094	0.0516269	0.0887034		0.0175407	0.112786	0.0430077	0.0283208
2015-07-14	13:06:15	00:00:05	135.5	2.25833	26.06	26.0615	39.38	17.5995	40.918	50.4883	82.6111	175.833								11.3426	26.918	42.5703	37.4774		0.00663371	0.0265331	0.055346	0.0451155		0.0174401	0.111688	0.043099	0.0284827
2015-07-14	13:06:20	00:00:05	135.583	2.25972	26.06	26.0615	39.32	16.9159	76.2695	54.8584	109.753	175.778								10.659	62.2695	46.9404	64.6193		0.00600419	0.101863	0.0647382	0.108099		0.0173389	0.110772	0.0431574	0.0287695
2015-07-14	13:06:25	00:00:05	135.667	2.26111	26.06	26.0615	39.59	20.2881	45.3735	53.8452	84.2102	175.722								14.0312	31.3735	45.9272	39.0765		0.00933121	0.0339224	0.0625114	0.0482428		0.0172496	0.109501	0.0432834	0.0289251
2015-07-14	13:06:30	00:00:05	135.75	2.2625	26.06	26.0614	39.78	23.1903	58.1726	60.8276	87.5244	175.667								16.9334	44.1726	52.9096	42.3907		0.0126155	0.0587252	0.078442	0.054972		0.0171613	0.108558	0.043466	0.0290985
2015-07-14	13:06:35	00:00:05	135.833	2.26389	26.06	26.0614	39.89	25.116	36.9873	70.2515	90.979	175.611								18.8591	22.9873	62.3335	45.8453		0.0149946	0.020598	0.102031	0.0623328		0.0170737	0.10761	0.0437635	0.0293236
2015-07-14	13:06:40	00:00:05	135.917	2.26528	26.06	26.0613	39.88	24.9329	38.739	58.5693	110.62	175.556								18.676	24.739	50.6513	65.4863		0.0147617	0.0231731	0.0731413	0.110434		0.0169728	0.106655	0.0439451	0.029668
2015-07-14	13:06:45	00:00:05	136	2.26667	26.06	26.0613	40.01	27.4567	54.3701	53.8452	108.459	175.5								21.1998	40.3701	45.9272	63.3253		0.0180898	0.0508299	0.0625114	0.104648		0.0168933	0.105951	0.0440886	0.0300304
2015-07-14	13:06:50	00:00:05	136.083	2.26806	26.06	26.0613	40.07	28.7292	56.7139	55.3711	80.7251	175.444								22.4723	42.7139	47.4531	35.5914		0.0198628	0.0556458	0.0658761	0.0415295		0.0168352	0.105093	0.0441885	0.0299564
2015-07-14	13:06:55	00:00:05	136.167	2.26944	26.06	26.0612	40.05	28.2959	72.3022	59.6802	92.4011	175.389								22.039	58.3022	51.7622	47.2674		0.0192521	0.0916554	0.0757314	0.0654631		0.0167767	0.104347	0.0443764	0.030036
2015-07-14	13:07:00	00:00:05	136.25	2.27083	26.06	26.0612	40.24	32.7759	67.3706	58.5693	93.1213	175.333								26.519	53.3706	50.6513	47.9876		0.025905	0.0795411	0.0731413	0.0670703		0.0167143	0.103491	0.0443919	0.0301376
2015-07-14	13:07:05	00:00:05	136.333	2.27222	26.06	26.0611	40.2	31.7627	61.2366	71.6309	99.8901	175.278								25.5058	47.2366	63.7129	54.7564		0.0243359	0.0653946	0.105677	0.0828799		0.0166834	0.102799	0.0446722	0.0303814
2015-07-14	13:07:10	00:00:05	136.417	2.27361	26.06	26.0611	40.28	33.8318	86.5845	60.2539	85.8521	175.222								27.5749	72.5845	52.3359	40.7184		0.0275793	0.130255	0.0770822	0.0515352		0.0166639	0.102472	0.0447667	0.0305225
2015-07-14	13:07:15	00:00:05	136.5	2.275	26.06	26.061	40.36	36.0718	69.165	66.9312	144.946	175.167								29.8149	55.165	59.0132	99.8123		0.0312601	0.0838741	0.0934548	0.217115		0.016651	0.102011	0.0448816	0.031352
2015-07-14	13:07:20	00:00:05	136.583	2.27639	26.06	26.061	40.45	38.8245	76.2695	55.3711	115.07	175.111								32.5676	62.2695	47.4531	69.9363		0.036017	0.101863	0.0658761	0.122716		0.0166667	0.101566	0.0450371	0.0317795
2015-07-14	13:07:25	00:00:05	136.667	2.27778	26.06	26.061	40.47	39.4714	85.0098	61.4014	93.4814	175.056								33.2145	71.0098	53.4834	48.3477		0.0371713	0.125752	0.079811	0.0678794		0.0166617	0.101158	0.0451792	0.0320249
2015-07-14	13:07:30	00:00:05	136.75	2.27917	26.06	26.0609	40.59	43.6584	83.4839	66.9312	77.4048	175								37.4015	69.4839	59.0132	32.2711		0.0449689	0.121446	0.0934548	0.0354925		0.0166704	0.100594	0.0454454	0.0320875
2015-07-14	13:07:35	00:00:05	136.833	2.28056	26.06	26.0609	40.61	44.4092	74.2554	66.2842	101.862	174.944								38.1523	60.2554	58.3662	56.7283		0.0464256	0.0966302	0.0918168	0.0877191		0.0167065	0.100157	0.0456593	0.0323997
2015-07-14	13:07:40	00:00:05	136.917	2.28194	26.07	26.0609	40.63	45.1782	81.9824	60.2539	101.068	174.889								38.9213	67.9824	52.3359	55.9343		0.0479357	0.117264	0.0770822	0.0857581		0.0167608	0.0996809	0.0458089	0.032564
2015-07-14	13:07:45	00:00:05	137	2.28333	26.07	26.0609	40.68	47.168	72.3022	53.8452	101.465	174.833								40.9111	58.3022	45.9272	56.3313		0.0519269	0.0916554	0.0625114	0.0867365		0.0168247	0.0991936	0.0459252	0.0326993
2015-07-14	13:07:50	00:00:05	137.083	2.28472	26.07	26.0609	40.61	44.4092	90.6494	65.6494	81.3477	174.778								38.1523	76.6494	57.7314	36.214		0.0464256	0.142151	0.0902203	0.0427009		0.0168633	0.0989013	0.0462498	0.0328007
2015-07-14	13:07:55	00:00:05	137.167	2.28611	26.07	26.0609	40.8	52.4292	96.7285	54.3457	86.5173	174.722								46.1723	82.7285	46.4277	41.3836		0.0630473	0.160664	0.0636077	0.0528922		0.0169501	0.0987877	0.0464521	0.0325755
2015-07-14	13:08:00	00:00:05	137.25	2.2875	26.07	26.0609	40.77	51.0498	94.9463	58.5693	92.7612	174.667								44.7929	80.9463	50.6513	47.6275		0.0600535	0.155148	0.0731413	0.0662649		0.017038	0.0985495	0.0465139	0.0327534
2015-07-14	13:08:05	00:00:05	137.333	2.28889	26.07	26.0609	40.76	50.5981	94.9463	56.4087	69.5984	174.611								44.3412	80.9463	48.4907	24.4647		0.0590851	0.155148	0.0682017	0.0227624		0.0170643	0.0982312	0.0466872	0.0327004
2015-07-14	13:08:10	00:00:05	137.417	2.29028	26.07	26.0609	40.9	57.373	113.501	73.7671	73.9441	174.556								51.1161	99.501	65.8491	28.8104		0.0742208	0.21603	0.111417	0.0295881		0.017192	0.0983205	0.0470366	0.0327443
2015-07-14	13:08:15	00:00:05	137.5	2.29167	26.07	26.0609	41	62.9272	96.7285	63.7817	78.2959	174.5								56.6703	82.7285	55.8637	33.1622		0.0875752	0.160664	0.0855845	0.0370776		0.0173474	0.0979195	0.0472985	0.0328023
2015-07-14	13:08:20	00:00:05	137.583	2.29306	26.07	26.0609	41	62.9272	101.343	58.5693	77.1057	174.444								56.6703	87.343	50.6513	31.972		0.0875752	0.175279	0.0731413	0.0349663		0.0175446	0.0976683	0.0475529	0.0328322
2015-07-14	13:08:25	00:00:05	137.667	2.29444	26.07	26.0609	41	62.9272	91.4917	71.6309	116.443	174.389								56.6703	77.4917	63.7129	71.3093		0.0875752	0.144665	0.105677	0.126604		0.0177445	0.0973392	0.047975	0.0332097
2015-07-14	13:08:30	00:00:05	137.75	2.29583	26.07	26.0609	41.08	67.8467	91.4917	68.2373	84.5398	174.333								61.5898	77.4917	60.3193	39.4061		0.100085	0.144665	0.0967946	0.0488971		0.0179885	0.0970728	0.0483702	0.0332522
2015-07-14	13:08:35	00:00:05	137.833	2.29722	26.07	26.0609	41.08	67.8467	99.4629	70.2515	98.7244	174.278								61.5898	85.4629	62.3335	53.5907		0.100085	0.169266	0.102031	0.080068		0.0182269	0.0969239	0.048777	0.0334422
2015-07-14	13:08:40	00:00:05	137.917	2.29861	26.07	26.0609	41.1	69.1528	85.791	79.0405	85.5225	174.222								62.8959	71.791	71.1225	40.3888		0.103512	0.127978	0.126072	0.0508677		0.0184708	0.0966602	0.0492893	0.033561
2015-07-14	13:08:45	00:00:05	138	2.3	26.07	26.0609	41.04	65.332	97.6318	65.0269	91.687	174.167								59.0751	83.6318	57.1089	46.5533		0.093612	0.163487	0.088665	0.063884		0.0186301	0.0964568	0.0496457	0.0337418
2015-07-14	13:08:50	00:00:05	138.083	2.30139	26.07	26.0609	41.01	63.5132	90.6494	67.5781	70.6604	174.111								57.2563	76.6494	59.6601	25.5267		0.0890323	0.142151	0.0951035	0.0243679		0.0188013	0.0962928	0.0500283	0.0337401
2015-07-14	13:08:55	00:00:05	138.167	2.30278	26.07	26.0609	41.07	67.2119	107.227	63.1836	75.3662	174.056								60.955	93.227	55.2656	30.2325		0.098436	0.194601	0.0841195	0.0319654		0.0189951	0.0963733	0.0503597	0.0337232
2015-07-14	13:09:00	00:00:05	138.25	2.30417	26.07	26.0609	41	62.9272	101.343	54.8584	74.7925	174								56.6703	87.343	46.9404	29.6588		0.0875752	0.175279	0.0647382	0.030998		0.0191057	0.0963733	0.0505762	0.0337456
2015-07-14	13:09:05	00:00:05	138.333	2.30556	26.07	26.0609	41.03	64.7217	101.343	71.6309	88.5437	173.944								58.4648	87.343	63.7129	43.41		0.0920657	0.175279	0.105677	0.0571075		0.0192351	0.0962345	0.0508124	0.0337852
2015-07-14	13:09:10	00:00:05	138.417	2.30694	26.07	26.061	41.04	65.332	96.7285	78.2593	87.8601	173.889								59.0751	82.7285	70.3413	42.7264		0.093612	0.160664	0.123858	0.0556719		0.0193448	0.0961475	0.0512506	0.0339628
2015-07-14	13:09:15	00:00:05	138.5	2.30833	26.07	26.061	41.09	68.4937	104.248	70.9351	88.2019	173.833								62.2368	90.248	63.0171	43.0682		0.101777	0.184723	0.103832	0.056388		0.0194885	0.096048	0.0516615	0.0341512
2015-07-14	13:09:20	00:00:05	138.583	2.30972	26.07	26.061	41.2	76.1719	100.403	71.6309	80.4199	173.778								69.915	86.403	63.7129	35.2862		0.122656	0.172263	0.105677	0.0409598		0.0197612	0.0958339	0.0519947	0.0341339
2015-07-14	13:09:25	00:00:05	138.667	2.31111	26.07	26.0611	41.24	79.2114	111.353	77.4902	73.6633	173.722								72.9545	97.353	69.5722	28.5296		0.131321	0.208599	0.121693	0.0291269		0.020037	0.0958489	0.0523697	0.0340405
2015-07-14	13:09:30	00:00:05	138.75	2.3125	26.07	26.0611	41.27	81.5918	100.403	60.8276	99.4995	173.667								75.3349	86.403	52.9096	54.3658		0.138261	0.172263	0.078442	0.0819336		0.0203039	0.0957836	0.0526531	0.0342528
2015-07-14	13:09:35	00:00:05	138.833	2.31389	26.07	26.0612	41.25	80.0049	111.353	64.4043	68.3014	173.611								73.748	97.353	56.4863	23.1677		0.13362	0.208599	0.0871196	0.020858		0.020477	0.0958558	0.0529462	0.0341491
2015-07-14	13:09:40	00:00:05	138.917	2.31528	26.07	26.0612	41.25	80.0049	106.226	65.0269	72.2839	173.556								73.748	92.226	57.1089	27.1502		0.13362	0.19126	0.088665	0.0269012		0.0206979	0.0959096	0.0532723	0.0341219
2015-07-14	13:09:45	00:00:05	139	2.31667	26.07	26.0612	41.17	73.9746	109.277	70.9351	68.8171	173.5								67.7177	95.277	63.0171	23.6834		0.116532	0.20151	0.103832	0.0216077		0.0208792	0.0957505	0.0536051	0.0339915
2015-07-14	13:09:50	00:00:05	139.083	2.31806	26.07	26.0612	41.05	65.9546	112.427	65.0269	74.2249	173.444								59.6977	98.427	57.1089	29.0912		0.0951996	0.212302	0.088665	0.030052		0.0209509	0.0957193	0.0538765	0.0340635
2015-07-14	13:09:55	00:00:05	139.167	2.31944	26.07	26.0612	41.18	74.6948	107.227	56.4087	76.5198	173.389								68.4379	93.227	48.4907	31.3861		0.118526	0.194601	0.0682017	0.0339442		0.0210976	0.0956455	0.0540478	0.0341796
2015-07-14	13:10:00	00:00:05	139.25	2.32083	26.07	26.0612	41.04	65.332	96.7285	58.02	89.9231	173.333								59.0751	82.7285	50.102	44.7894		0.093612	0.160664	0.0718732	0.0600461		0.0211462	0.0953335	0.0542651	0.0342946
2015-07-14	13:10:05	00:00:05	139.333	2.32222	26.07	26.0612	41.01	63.5132	92.3462	56.4087	78.894	173.278								57.2563	78.3462	48.4907	33.7603		0.0890323	0.147233	0.0682017	0.038156		0.0211922	0.0949129	0.0544611	0.0342731
2015-07-14	13:10:10	00:00:05	139.417	2.32361	26.07	26.0612	41.15	72.5586	79.0649	57.4768	75.0793	173.222								66.3017	65.0649	49.5588	29.9456		0.112648	0.109297	0.0706274	0.0314802		0.0213903	0.0944526	0.0546981	0.0342993
2015-07-14	13:10:15	00:00:05	139.5	2.325	26.07	26.0612	41.12	70.4956	84.2407	58.5693	84.8633	173.167								64.2387	70.2407	50.6513	39.7296		0.107079	0.123574	0.0731413	0.0495426		0.0216235	0.0941278	0.0549329	0.0343303
2015-07-14	13:10:20	00:00:05	139.583	2.32639	26.07	26.0613	41.06	66.5771	76.2695	66.2842	74.2249	173.111								60.3202	62.2695	58.3662	29.0912		0.0967969	0.101863	0.0918168	0.030052		0.0217806	0.0936042	0.0552561	0.0343452
2015-07-14	13:10:25	00:00:05	139.667	2.32778	26.07	26.0613	41.11	69.8242	84.2407	68.2373	86.5173	173.056								63.5673	70.2407	60.3193	41.3836		0.10529	0.123574	0.0967946	0.0528922		0.0219609	0.0932033	0.0556236	0.034474
2015-07-14	13:10:30	00:00:05	139.75	2.32917	26.07	26.0613	41.17	73.9746	85.0098	53.3508	70.1294	173								67.7177	71.0098	45.4328	24.9957		0.116532	0.125752	0.0614356	0.02356		0.022208	0.0928115	0.0557724	0.0342927
2015-07-14	13:10:35	00:00:05	139.833	2.33056	26.07	26.0614	41.17	73.9746	92.3462	57.4768	65.5396	172.944								67.7177	78.3462	49.5588	20.4059		0.116532	0.147233	0.0706274	0.0170156		0.0223893	0.092477	0.055901	0.0341807
2015-07-14	13:10:40	00:00:05	139.917	2.33194	26.07	26.0614	41.1	69.1528	87.3779	69.5679	63.6047	172.889								62.8959	73.3779	61.6499	18.471		0.103512	0.132546	0.100242	0.0145027		0.0225898	0.0921291	0.0562736	0.0341831
2015-07-14	13:10:45	00:00:05	140	2.33333	26.07	26.0615	41.15	72.5586	85.791	72.3389	57.9712	172.833								66.3017	71.791	64.4209	12.8375		0.112648	0.127978	0.107567	0.008091		0.0228562	0.0917143	0.056648	0.0340992
2015-07-14	13:10:50	00:00:05	140.083	2.33472	26.07	26.0615	41.16	73.2666	94.0674	63.7817	65.2924	172.778								67.0097	80.0674	55.8637	20.1587		0.114584	0.152455	0.0855845	0.0166862		0.0230953	0.091368	0.0568898	0.0340455
2015-07-14	13:10:55	00:00:05	140.167	2.33611	26.07	26.0615	41.13	71.167	103.271	55.8838	62.4329	172.722								64.9101	89.271	47.9658	17.2992		0.10888	0.181526	0.0670214	0.0130555		0.0233326	0.0911763	0.0571085	0.0338067
2015-07-14	13:11:00	00:00:05	140.25	2.3375	26.07	26.0615	41.13	71.167	94.0674	59.6802	54.8584	172.667								64.9101	80.0674	51.7622	9.72471		0.10888	0.152455	0.0757314	0.00518267		0.0235699	0.0908797	0.0573554	0.0335653
2015-07-14	13:11:05	00:00:05	140.333	2.33889	26.07	26.0615	41.14	71.8628	98.5352	68.2373	65.2924	172.611								65.6059	84.5352	60.3193	20.1587		0.110758	0.166329	0.0967946	0.0166862		0.0238715	0.0906726	0.057732	0.0332568
2015-07-14	13:11:10	00:00:05	140.417	2.34028	26.07	26.0616	41.12	70.4956	110.303	70.9351	70.1294	172.556								64.2387	96.303	63.0171	24.9957		0.107079	0.205002	0.103832	0.02356		0.0241474	0.0907298	0.0580666	0.0330328
2015-07-14	13:11:15	00:00:05	140.5	2.34167	26.07	26.0616	41.11	69.8242	107.227	74.4873	64.563	172.5								63.5673	93.227	66.5693	19.4293		0.10529	0.194601	0.113379	0.0157284		0.024436	0.0907437	0.0584763	0.0327287
2015-07-14	13:11:20	00:00:05	140.583	2.34306	26.07	26.0617	41.02	64.1113	101.343	90.0635	71.7346	172.444								57.8544	87.343	82.1455	26.6009		0.0905287	0.175279	0.158852	0.0260335		0.0246788	0.0904925	0.0590149	0.032704
2015-07-14	13:11:25	00:00:05	140.667	2.34444	26.07	26.0617	41.01	63.5132	91.4917	76.7334	71.4661	172.389								57.2563	77.4917	68.8154	26.3324		0.0890323	0.144665	0.119577	0.0256133		0.0249066	0.0901473	0.0593385	0.0327269
2015-07-14	13:11:30	00:00:05	140.75	2.34583	26.07	26.0617	40.9	57.373	100.403	69.5679	75.0793	172.333								51.1161	86.403	61.6499	29.9456		0.0742208	0.172263	0.100242	0.0314802		0.0250916	0.0900398	0.0596665	0.0326945
2015-07-14	13:11:35	00:00:05	140.833	2.34722	26.07	26.0618	40.97	61.1938	85.0098	65.6494	54.2603	172.278								54.9369	71.0098	57.7314	9.12661		0.0833184	0.125752	0.0902203	0.00468097		0.0253022	0.0895477	0.0599602	0.0325335
2015-07-14	13:11:40	00:00:05	140.917	2.34861	26.07	26.0618	40.92	58.4351	103.271	70.2515	60.376	172.222								52.1782	89.271	62.3335	15.2423		0.0767099	0.181526	0.102031	0.0106565		0.0254956	0.0894194	0.0603032	0.0320559
2015-07-14	13:11:45	00:00:05	141	2.35	26.07	26.0619	40.84	54.3396	107.227	81.4453	46.4417	172.167								48.0827	93.227	73.5273	1.30801		0.0672836	0.194601	0.132979	0.000207512		0.0256593	0.0892487	0.0607205	0.0318421
2015-07-14	13:11:50	00:00:05	141.083	2.35139	26.07	26.0619	40.83	53.8574	98.5352	69.5679	60.376	172.111								47.6005	84.5352	61.6499	15.2423		0.0662045	0.166329	0.100242	0.0106565		0.0258353	0.088943	0.0610777	0.0316104
2015-07-14	13:11:55	00:00:05	141.167	2.35278	26.07	26.062	40.77	51.0498	101.343	63.7817	73.3887	172.056								44.7929	87.343	55.8637	28.255		0.0600535	0.175279	0.0855845	0.0286785		0.0259759	0.0887086	0.061397	0.0315592
2015-07-14	13:12:00	00:00:07	141.283	2.35472	26.07	26.062	40.82	53.3691	101.343	62.5854	63.6047	172								47.1122	87.343	54.6674	18.471		0.0651186	0.175279	0.0826639	0.0145027		0.026149	0.0886825	0.0617188	0.0314021
2015-07-14	13:12:07	00:00:03	141.333	2.35556	26.07	26.062	40.77	51.0498	101.343	68.8965	74.7925	171.944								44.7929	87.343	60.9785	29.6588		0.0600535	0.175279	0.0984969	0.030998		0.0263083	0.088481	0.0620123	0.031231
2015-07-14	13:12:10	00:00:05	141.417	2.35694	26.07	26.0621	40.82	53.3691	111.353	77.4902	64.8071	171.889								47.1122	97.353	69.5722	19.6734		0.0651186	0.208599	0.121693	0.0160466		0.0265077	0.0884344	0.0624681	0.0311543
2015-07-14	13:12:15	00:00:05	141.5	2.35833	26.07	26.0621	40.91	57.9041	103.271	63.1836	49.5453	171.833								51.6472	89.271	55.2656	4.41161		0.0754616	0.181526	0.0841195	0.00145859		0.0267644	0.0881568	0.0626841	0.0310147
2015-07-14	13:12:20	00:00:05	141.583	2.35972	26.07	26.0622	40.88	56.3416	93.2007	55.3711	64.563	171.778								50.0847	79.2007	47.4531	19.4293		0.0718333	0.149817	0.0658761	0.0157284		0.0270002	0.0878964	0.0629034	0.0308627
2015-07-14	13:12:25	00:00:05	141.667	2.36111	26.07	26.0622	40.81	52.8931	109.277	72.3389	57.1228	171.722								46.6362	95.277	64.4209	11.9891		0.0640665	0.20151	0.107567	0.00725059		0.0272047	0.0877713	0.063328	0.0307696
2015-07-14	13:12:30	00:00:05	141.75	2.3625	26.07	26.0622	40.8	52.4292	105.225	66.2842	67.5354	171.667								46.1723	91.225	58.3662	22.4017		0.0630473	0.187941	0.0918168	0.0197629		0.0273691	0.0877002	0.0636368	0.0306813
2015-07-14	13:12:35	00:00:05	141.833	2.36389	26.07	26.0623	40.77	51.0498	107.227	66.2842	73.9441	171.611								44.7929	93.227	58.3662	28.8104		0.0600535	0.194601	0.0918168	0.0295881		0.0275624	0.0874406	0.0639887	0.0307525
2015-07-14	13:12:40	00:00:05	141.917	2.36528	26.07	26.0623	40.74	49.7131	103.271	59.1187	62.4329	171.556								43.4562	89.271	51.2007	17.2992		0.057205	0.181526	0.074418	0.0130555		0.0277573	0.0871629	0.0642636	0.0306797
2015-07-14	13:12:45	00:00:05	142	2.36667	26.07	26.0624	40.75	50.1526	105.225	58.02	60.1532	171.5								43.8957	91.225	50.102	15.0195		0.0581358	0.187941	0.0718732	0.0104077		0.027954	0.0869299	0.0645375	0.0304264
2015-07-14	13:12:50	00:00:05	142.083	2.36806	26.07	26.0624	40.82	53.3691	89.8193	54.8584	73.9441	171.444								47.1122	75.8193	46.9404	28.8104		0.0651186	0.13969	0.0647382	0.0295881		0.0281759	0.0864038	0.064728	0.0304627
2015-07-14	13:12:55	00:00:05	142.167	2.36944	26.07	26.0625	40.74	49.7131	111.353	61.4014	54.0619	171.389								43.4562	97.353	53.4834	8.92821		0.057205	0.208599	0.079811	0.00451882		0.0283467	0.0861648	0.065	0.0304199
2015-07-14	13:13:00	00:00:05	142.25	2.37083	26.07	26.0625	40.76	50.5981	101.343	68.2373	82.6111	171.333								44.3412	87.343	60.3193	37.4774		0.0590851	0.175279	0.0967946	0.0451155		0.0285254	0.0859633	0.0653639	0.0305665
2015-07-14	13:13:05	00:00:05	142.333	2.37222	26.07	26.0625	40.82	53.3691	91.4917	60.2539	64.0808	171.278								47.1122	77.4917	52.3359	18.9471		0.0651186	0.144665	0.0770822	0.015107		0.0287672	0.0855499	0.0656668	0.030569
2015-07-14	13:13:10	00:00:05	142.417	2.37361	26.07	26.0626	40.77	51.0498	91.4917	59.1187	58.8318	171.222								44.7929	77.4917	51.2007	13.6981		0.0600535	0.144665	0.074418	0.00897848		0.0289753	0.0851712	0.0659423	0.0305736
2015-07-14	13:13:15	00:00:05	142.5	2.375	26.07	26.0626	40.87	55.835	82.7271	53.8452	68.8171	171.167								49.5781	68.7271	45.9272	23.6834		0.0706714	0.119331	0.0625114	0.0216077		0.0292211	0.0846522	0.0661901	0.0306116
2015-07-14	13:13:20	00:00:05	142.583	2.37639	26.07	26.0627	40.92	58.4351	69.165	51.8921	69.3359	171.111								52.1782	55.165	43.9741	24.2022		0.0767099	0.0838741	0.0583025	0.0223719		0.0295025	0.0839677	0.0663896	0.0306614
2015-07-14	13:13:25	00:00:05	142.667	2.37778	26.07	26.0627	40.84	54.3396	76.2695	60.8276	61.5082	171.056								48.0827	62.2695	52.9096	16.3745		0.0672836	0.101863	0.078442	0.0119543		0.0297481	0.0832644	0.0666466	0.0306289
2015-07-14	13:13:30	00:00:05	142.75	2.37917	26.07	26.0627	40.71	48.4192	89.8193	62.5854	62.4329	171								42.1623	75.8193	54.6674	17.2992		0.0544976	0.13969	0.0826639	0.0130555		0.0299387	0.0829923	0.066872	0.0306324
2015-07-14	13:13:35	00:00:05	142.833	2.38056	26.07	26.0628	40.87	55.835	114.575	59.1187	60.1532	170.944								49.5781	100.575	51.2007	15.0195		0.0706714	0.219783	0.074418	0.0104077		0.030189	0.0830389	0.067117	0.0306549
2015-07-14	13:13:40	00:00:05	142.917	2.38194	26.07	26.0628	40.81	52.8931	94.9463	54.8584	62.6648	170.889								46.6362	80.9463	46.9404	17.5311		0.0640665	0.155148	0.0647382	0.0133374		0.0304177	0.0826333	0.0673466	0.0306749
2015-07-14	13:13:45	00:00:05	143	2.38333	26.07	26.0629	40.74	49.7131	92.3462	55.8838	64.0808	170.833								43.4562	78.3462	47.9658	18.9471		0.057205	0.147233	0.0670214	0.015107		0.0306126	0.0824072	0.0676112	0.0307314
2015-07-14	13:13:50	00:00:05	143.083	2.38472	26.07	26.0629	40.79	51.9653	103.271	65.6494	65.5396	170.778								45.7084	89.271	57.7314	20.4059		0.0620344	0.181526	0.0902203	0.0170156		0.0308296	0.0823527	0.0679645	0.0307639
2015-07-14	13:13:55	00:00:05	143.167	2.38611	26.07	26.063	40.8	52.4292	101.343	60.2539	70.929	170.722								46.1723	87.343	52.3359	25.7953		0.0630473	0.175279	0.0770822	0.0247805		0.031043	0.0822289	0.0681228	0.0308352
2015-07-14	13:14:00	00:00:05	143.25	2.3875	26.07	26.063	40.79	51.9653	110.303	55.8838	50.2686	170.667								45.7084	96.303	47.9658	5.13491		0.0620344	0.205002	0.0670214	0.00186077		0.0312573	0.0823527	0.0683057	0.0308334
2015-07-14	13:14:05	00:00:05	143.333	2.38889	26.07	26.063	40.81	52.8931	99.4629	61.9873	50.6348	170.611								46.6362	85.4629	54.0693	5.50111		0.0640665	0.169266	0.081218	0.00207817		0.031484	0.0823527	0.0684537	0.0308408
2015-07-14	13:14:10	00:00:05	143.417	2.39028	26.07	26.0631	40.76	50.5981	110.303	66.2842	77.4048	170.556								44.3412	96.303	58.3662	32.2711		0.0590851	0.205002	0.0918168	0.0354925		0.0316777	0.082396	0.0687432	0.0309483
2015-07-14	13:14:15	00:00:05	143.5	2.39167	26.07	26.0631	40.74	49.7131	111.353	46.9482	56.0791	170.5								43.4562	97.353	39.0302	10.9454		0.057205	0.208599	0.0481511	0.00626509		0.0318752	0.0825599	0.0689252	0.0309389
2015-07-14	13:14:20	00:00:05	143.583	2.39306	26.08	26.0632	40.77	51.0498	119.019	54.3457	59.0515	170.444								44.7929	105.019	46.4277	13.9178		0.0600535	0.235566	0.0636077	0.00921058		0.0320918	0.0827306	0.0691651	0.0309646
2015-07-14	13:14:25	00:00:05	143.667	2.39444	26.07	26.0632	40.73	49.2798	126.074	75.2319	54.0619	170.389								43.0229	112.074	67.3139	8.92821		0.0562928	0.26146	0.11542	0.00451882		0.0322822	0.0831848	0.0696154	0.0309834
2015-07-14	13:14:30	00:00:05	143.75	2.39583	26.08	26.0633	40.81	52.8931	126.074	49.1272	53.8635	170.333								46.6362	112.074	41.2092	8.72981		0.0640665	0.26146	0.0525351	0.00435884		0.0325121	0.0835812	0.0697839	0.0309777
2015-07-14	13:14:35	00:00:05	143.833	2.39722	26.07	26.0634	40.79	51.9653	132.275	52.3804	59.491	170.278								45.7084	118.275	44.4624	14.3573		0.0620344	0.285049	0.0593444	0.00968154		0.0327271	0.0840125	0.0699241	0.0310006
2015-07-14	13:14:40	00:00:05	143.917	2.39861	26.07	26.0634	40.85	54.834	119.019	48.2422	44.0216	170.222								48.5771	105.019	40.3242	-1.11209		0.0683967	0.235566	0.0507372	0		0.0329762	0.0842637	0.0700861	0.0309775
2015-07-14	13:14:45	00:00:05	144	2.4	26.07	26.0635	40.81	52.8931	120.166	39.6851	62.4329	170.167								46.6362	106.166	31.7671	17.2992		0.0640665	0.239707	0.0346076	0.0130555		0.0331863	0.084649	0.0701937	0.0310254
2015-07-14	13:14:50	00:00:05	144.083	2.40139	26.07	26.0635	40.84	54.3396	129.761	45.7031	59.0515	170.111								48.0827	115.761	37.7851	13.9178		0.0672836	0.275393	0.0457111	0.00921058		0.0334001	0.0851153	0.0702771	0.0310638
2015-07-14	13:14:55	00:00:05	144.167	2.40278	26.07	26.0635	40.93	58.9722	127.271	57.4768	45.6177	170.056								52.7153	113.271	49.5588	0.484009		0.0779804	0.265954	0.0706274	4.21215e-05		0.0336625	0.0856207	0.0705063	0.0310587
2015-07-14	13:15:00	00:00:05	144.25	2.40417	26.07	26.0636	40.91	57.9041	120.166	55.8838	57.1228	170								51.6472	106.166	47.9658	11.9891		0.0754616	0.239707	0.0670214	0.00725059		0.0339433	0.0860271	0.0707589	0.0310402
2015-07-14	13:15:05	00:00:05	144.333	2.40556	26.07	26.0636	40.88	56.3416	111.353	46.9482	63.3667	169.944								50.0847	97.353	39.0302	18.233		0.0718333	0.208599	0.0481511	0.0142042		0.034197	0.0863243	0.0709312	0.0310994
2015-07-14	13:15:10	00:00:05	144.417	2.40694	26.07	26.0637	40.8	52.4292	109.277	68.2373	59.2712	169.889								46.1723	95.277	60.3193	14.1375		0.0630473	0.20151	0.0967946	0.0094449		0.0343973	0.0865287	0.0713032	0.031136
2015-07-14	13:15:15	00:00:05	144.5	2.40833	26.07	26.0637	40.83	53.8574	114.575	67.5781	43.7103	169.833								47.6005	100.575	59.6601	-1.42339		0.0662045	0.219783	0.0951035	0		0.0346384	0.086798	0.0716244	0.031136
2015-07-14	13:15:20	00:00:05	144.583	2.40972	26.07	26.0637	40.83	53.8574	105.225	58.5693	56.2866	169.778								47.6005	91.225	50.6513	11.1529		0.0662045	0.187941	0.0731413	0.00645669		0.0348672	0.0870091	0.0718345	0.0311619
2015-07-14	13:15:25	00:00:05	144.667	2.41111	26.07	26.0638	40.9	57.373	108.252	51.8921	46.6064	169.722								51.1161	94.252	43.9741	1.47271		0.0742208	0.198044	0.0583025	0.000250991		0.0351271	0.0872722	0.0719967	0.0311216
2015-07-14	13:15:30	00:00:05	144.75	2.4125	26.07	26.0638	41.02	64.1113	109.277	44.0979	62.8967	169.667								57.8544	95.277	36.1799	17.763		0.0905287	0.20151	0.0426364	0.0136215		0.0354615	0.0875498	0.0721081	0.0311784
2015-07-14	13:15:35	00:00:05	144.833	2.41389	26.07	26.0639	40.91	57.9041	109.277	37.677	57.3303	169.611								51.6472	95.277	29.759	12.1966		0.0754616	0.20151	0.0311661	0.00745293		0.0357423	0.0878746	0.0721433	0.0312033
2015-07-14	13:15:40	00:00:05	144.917	2.41528	26.07	26.0639	40.98	61.7676	112.427	43.3228	56.4941	169.556								55.5107	98.427	35.4048	11.3604		0.0847187	0.212302	0.0411808	0.00665045		0.0360667	0.0882164	0.0721433	0.031231
2015-07-14	13:15:45	00:00:05	145	2.41667	26.07	26.064	41.05	65.9546	95.8252	50.9521	66.5283	169.5								59.6977	81.8252	43.0341	21.3946		0.0951996	0.157859	0.0563164	0.0183572		0.0364343	0.0884572	0.0722458	0.0313074
2015-07-14	13:15:50	00:00:05	145.083	2.41806	26.08	26.064	41.13	71.167	98.5352	49.1272	57.3303	169.444								64.9101	84.5352	41.2092	12.1966		0.10888	0.166329	0.0525351	0.00745293		0.0368538	0.0888008	0.072318	0.0312972
2015-07-14	13:15:55	00:00:05	145.167	2.41944	26.08	26.0641	41.11	69.8242	110.303	44.8914	63.1348	169.389								63.5673	96.303	36.9734	18.0011		0.10529	0.205002	0.0441463	0.0139155		0.037226	0.0892153	0.0723986	0.0313551
2015-07-14	13:16:00	00:00:05	145.25	2.42083	26.08	26.0642	41.06	66.5771	90.6494	51.4221	60.8276	169.333								60.3202	76.6494	43.5041	15.6939		0.0967969	0.142151	0.0573062	0.0111674		0.0375784	0.0893757	0.0723986	0.0314013
2015-07-14	13:16:05	00:00:05	145.333	2.42222	26.08	26.0643	40.96	60.6323	80.5054	40.7349	56.2866	169.278								54.3754	66.5054	32.8169	11.1529		0.0819567	0.113204	0.0364603	0.00645669		0.0378771	0.089392	0.0724038	0.0314059
2015-07-14	13:16:10	00:00:05	145.417	2.42361	26.07	26.0643	41	62.9272	100.403	27.0386	61.2793	169.222								56.6703	86.403	19.1206	16.1456		0.0875752	0.172263	0.0153295	0.0116874		0.0382049	0.0896623	0.0723826	0.0314389
2015-07-14	13:16:15	00:00:05	145.5	2.425	26.07	26.0644	41.01	63.5132	96.7285	47.3755	63.6047	169.167								57.2563	82.7285	39.4575	18.471		0.0890323	0.160664	0.0489994	0.0145027		0.0385208	0.0899696	0.0724591	0.0314902
2015-07-14	13:16:20	00:00:05	145.583	2.42639	26.07	26.0644	41.09	68.4937	83.4839	31.0425	58.8318	169.111								62.2368	69.4839	23.1245	13.6981		0.101777	0.121446	0.0207956	0.00897848		0.0389072	0.0901777	0.0723771	0.0314789
2015-07-14	13:16:25	00:00:05	145.667	2.42778	26.07	26.0645	41.16	73.2666	94.9463	34.3079	61.2793	169.056								67.0097	80.9463	26.3899	16.1456		0.114584	0.155148	0.0257031	0.0116874		0.0393476	0.0905154	0.0723673	0.0315274
2015-07-14	13:16:30	00:00:05	145.75	2.42917	26.07	26.0645	41.16	73.2666	92.3462	33.1726	62.6648	169								67.0097	78.3462	25.2546	17.5311		0.114584	0.147233	0.0239526	0.0133374		0.0397836	0.0908033	0.07236	0.0315821
2015-07-14	13:16:35	00:00:05	145.833	2.43056	26.07	26.0645	41.1	69.1528	93.2007	37.0361	53.6682	168.944								62.8959	79.2007	29.1181	8.53451		0.103512	0.149817	0.0300966	0.00420349		0.0401766	0.0912079	0.0722588	0.0315923
2015-07-14	13:16:40	00:00:05	145.917	2.43194	26.07	26.0646	41.01	63.5132	97.6318	33.4534	75.3662	168.889								57.2563	83.6318	25.5354	30.2325		0.0890323	0.163487	0.0243813	0.0319654		0.0404982	0.0916572	0.0721044	0.0317255
2015-07-14	13:16:45	00:00:05	146	2.43333	26.07	26.0646	41.12	70.4956	94.0674	38.3301	68.8171	168.833								64.2387	80.0674	30.4121	23.6834		0.107079	0.152455	0.0322705	0.0216077		0.0409113	0.09202	0.0719916	0.031815
2015-07-14	13:16:50	00:00:05	146.083	2.43472	26.07	26.0647	41.11	69.8242	89.0015	37.3535	64.563	168.778								63.5673	75.0015	29.4355	19.4293		0.10529	0.137281	0.0306245	0.0157284		0.041319	0.0923643	0.0719847	0.0318054
2015-07-14	13:16:55	00:00:05	146.167	2.43611	26.07	26.0647	41.18	74.6948	90.6494	36.0962	66.2781	168.722								68.4379	76.6494	28.1782	21.1444		0.118526	0.142151	0.0285536	0.0180141		0.0417694	0.0927833	0.0719761	0.0318661
2015-07-14	13:17:00	00:00:05	146.25	2.4375	26.07	26.0647	41.23	78.4424	90.6494	43.7134	57.3303	168.667								72.1855	76.6494	35.7954	12.1966		0.129108	0.142151	0.041912	0.00745293		0.0422778	0.0931032	0.0719501	0.0318755
2015-07-14	13:17:05	00:00:05	146.333	2.43889	26.08	26.0649	41.26	80.7861	90.6494	46.9482	73.3887	168.611								74.5292	76.6494	39.0302	28.255		0.135897	0.142151	0.0481511	0.0286785		0.042814	0.0935432	0.0719668	0.0319926
2015-07-14	13:17:10	00:00:05	146.417	2.44028	26.08	26.065	41.19	75.4272	95.8252	39.6851	64.0808	168.556								69.1703	81.8252	31.7671	18.9471		0.120567	0.157859	0.0346076	0.015107		0.0432859	0.0939519	0.0719856	0.0320543
2015-07-14	13:17:15	00:00:05	146.5	2.44167	26.07	26.065	41.22	77.6733	94.9463	28.3752	69.8608	168.5								71.4164	80.9463	20.4572	24.7271		0.126909	0.155148	0.0170843	0.0231552		0.0437776	0.0944647	0.0718663	0.0321319
2015-07-14	13:17:20	00:00:05	146.583	2.44306	26.07	26.0651	41.16	73.2666	89.0015	31.5552	64.0808	168.444								67.0097	75.0015	23.6372	18.9471		0.114584	0.137281	0.0215401	0.015107		0.0442321	0.0949219	0.0718452	0.0321565
2015-07-14	13:17:25	00:00:05	146.667	2.44444	26.07	26.0651	41.14	71.8628	90.6494	31.5552	56.4941	168.389								65.6059	76.6494	23.6372	11.3604		0.110758	0.142151	0.0215401	0.00665045		0.0446501	0.0952985	0.0718259	0.0321785
2015-07-14	13:17:30	00:00:05	146.75	2.44583	26.07	26.0652	41.23	78.4424	78.3569	26.825	73.1079	168.333								72.1855	64.3569	18.907	27.9742		0.129108	0.107395	0.0150557	0.0282227		0.045158	0.095538	0.0716327	0.0322773
2015-07-14	13:17:35	00:00:05	146.833	2.44722	26.07	26.0652	41.24	79.2114	85.791	32.6233	65.2924	168.278								72.9545	71.791	24.7053	20.1587		0.131321	0.127978	0.0231225	0.0166862		0.0456829	0.096001	0.0713114	0.0323468
2015-07-14	13:17:40	00:00:05	146.917	2.44861	26.08	26.0653	41.2	76.1719	95.8252	17.8009	90.625	168.222								69.915	81.8252	9.8829	45.4913		0.122656	0.157859	0.00531856	0.0615625		0.0461673	0.0965065	0.0709769	0.0325678
2015-07-14	13:17:45	00:00:05	147	2.45	26.08	26.0654	41.14	71.8628	95.8252	16.806	52.89	168.167								65.6059	81.8252	8.888	7.75631		0.110758	0.157859	0.00448622	0.00360584		0.0466076	0.0970091	0.0707114	0.0325535
2015-07-14	13:17:50	00:00:05	147.083	2.45139	26.07	26.0654	41.07	67.2119	85.0098	23.8403	65.0482	168.111								60.955	71.0098	15.9223	19.9145		0.098436	0.125752	0.0114292	0.0163632		0.0470029	0.0974287	0.0704698	0.0326167
2015-07-14	13:17:55	00:00:05	147.167	2.45278	26.07	26.0655	41.07	67.2119	92.3462	32.8979	77.4048	168.056								60.955	78.3462	24.9799	32.2711		0.098436	0.147233	0.0235361	0.0354925		0.0473984	0.0979456	0.0702886	0.0327589
2015-07-14	13:18:00	00:00:05	147.25	2.45417	26.08	26.0655	41.03	64.7217	97.6318	34.021	83.2458	168								58.4648	83.6318	26.103	38.1121		0.0920657	0.163487	0.0252564	0.0463473		0.0477674	0.0984659	0.0701712	0.0328964
2015-07-14	13:18:05	00:00:05	147.333	2.45556	26.08	26.0656	41.05	65.9546	92.3462	29.0741	62.4329	167.944								59.6977	78.3462	21.1561	17.2992		0.0951996	0.147233	0.0180301	0.0130555		0.0481451	0.0989883	0.0700491	0.0329043
2015-07-14	13:18:10	00:00:05	147.417	2.45694	26.08	26.0657	41.03	64.7217	89.8193	24.2126	72.2839	167.889								58.4648	75.8193	16.2946	27.1502		0.0920657	0.13969	0.0118609	0.0269012		0.0485109	0.099481	0.0699856	0.0330164
2015-07-14	13:18:15	00:00:05	147.5	2.45833	26.08	26.0658	41.06	66.5771	89.8193	19.1498	80.4199	167.833								60.3202	75.8193	11.2318	35.2862		0.0967969	0.13969	0.0065301	0.0409598		0.0488806	0.0999702	0.0698471	0.0331852
2015-07-14	13:18:20	00:00:05	147.583	2.45972	26.08	26.0659	41.03	64.7217	94.0674	20.4712	64.8071	167.778								58.4648	80.0674	12.5532	19.6734		0.0920657	0.152455	0.00780551	0.0160466		0.049252	0.100538	0.069711	0.0332251
2015-07-14	13:18:25	00:00:05	147.667	2.46111	26.07	26.0659	41.02	64.1113	80.5054	18.0603	77.4048	167.722								57.8544	66.5054	10.1423	32.2711		0.0905287	0.113204	0.00554424	0.0354925		0.049618	0.100954	0.0695227	0.033373
2015-07-14	13:18:30	00:00:05	147.75	2.4625	26.07	26.066	41.05	65.9546	97.6318	29.5502	64.0808	167.667								59.6977	83.6318	21.6322	18.9471		0.0951996	0.163487	0.0186853	0.015107		0.0499992	0.101609	0.069326	0.0334359
2015-07-14	13:18:35	00:00:05	147.833	2.46389	26.07	26.066	41.08	67.8467	79.0649	28.6072	66.5283	167.611								61.5898	65.0649	20.6892	21.3946		0.100085	0.109297	0.0173961	0.0183572		0.0504062	0.101991	0.069083	0.0335023
2015-07-14	13:18:40	00:00:05	147.917	2.46528	26.07	26.066	41.03	64.7217	96.7285	40.3809	88.8855	167.556								58.4648	82.7285	32.4629	43.7518		0.0920657	0.160664	0.0358315	0.0578305		0.0507752	0.102581	0.0689481	0.0337264
2015-07-14	13:18:45	00:00:05	148	2.46667	26.07	26.0661	41.03	64.7217	87.3779	35.1868	64.3219	167.5								58.4648	73.3779	27.2688	19.1882		0.0920657	0.132546	0.0270899	0.0154165		0.0511492	0.103088	0.0687912	0.0337867
2015-07-14	13:18:50	00:00:05	148.083	2.46806	26.08	26.0662	40.89	56.8604	95.8252	55.3711	60.6018	167.444								50.6035	81.8252	47.4531	15.4681		0.0730305	0.157859	0.0658761	0.0109108		0.0514442	0.103688	0.0687912	0.0338322
2015-07-14	13:18:55	00:00:05	148.167	2.46944	26.08	26.0663	40.9	57.373	91.4917	24.9817	65.2924	167.389								51.1161	77.4917	17.0637	20.1587		0.0742208	0.144665	0.0127716	0.0166862		0.0517401	0.104253	0.0686178	0.0339015
2015-07-14	13:19:00	00:00:05	148.25	2.47083	26.08	26.0664	40.89	56.8604	100.403	32.0862	86.5173	167.333								50.6035	86.403	24.1682	41.3836		0.0730305	0.172263	0.0223215	0.0528922		0.0520279	0.104898	0.0684266	0.034108
2015-07-14	13:19:05	00:00:05	148.333	2.47222	26.08	26.0665	40.86	55.3345	90.6494	33.7341	75.0793	167.278								49.0776	76.6494	25.8161	29.9456		0.0695306	0.142151	0.0248126	0.0314802		0.0523045	0.105435	0.0682603	0.034239
2015-07-14	13:19:10	00:00:05	148.417	2.47361	26.08	26.0666	40.82	53.3691	81.2378	23.4741	74.2249	167.222								47.1122	67.2378	15.5561	29.0912		0.0651186	0.11521	0.0110105	0.030052		0.052563	0.105879	0.0680755	0.0343473
2015-07-14	13:19:15	00:00:05	148.5	2.475	26.08	26.0667	40.8	52.4292	87.3779	21.579	69.8608	167.167								46.1723	73.3779	13.661	24.7271		0.0630473	0.132546	0.0089395	0.0231552		0.0528171	0.106369	0.0678568	0.0344438
2015-07-14	13:19:20	00:00:05	148.583	2.47639	26.08	26.0668	40.72	48.8464	88.1836	26.6113	62.8967	167.111								42.5895	74.1836	18.6933	17.763		0.055386	0.134888	0.0147837	0.0136215		0.0530432	0.10689	0.0675972	0.0344324
2015-07-14	13:19:25	00:00:05	148.667	2.47778	26.08	26.0669	40.72	48.8464	97.6318	20.4712	59.0515	167.056								42.5895	83.6318	12.5532	13.9178		0.055386	0.163487	0.00780551	0.00921058		0.0532717	0.107548	0.0673693	0.0344707
2015-07-14	13:19:30	00:00:05	148.75	2.47917	26.08	26.067	40.7	47.998	74.9146	28.1494	73.6633	167								41.7411	60.9146	20.2314	28.5296		0.053627	0.0983314	0.0167828	0.0291269		0.0534925	0.107834	0.0670948	0.0345921
2015-07-14	13:19:35	00:00:05	148.833	2.48056	26.08	26.067	40.7	47.998	76.9531	38.3301	80.4199	166.944								41.7411	62.9531	30.4121	35.2862		0.053627	0.103663	0.0322705	0.0409598		0.0536978	0.108219	0.0668662	0.0347628
2015-07-14	13:19:40	00:00:05	148.917	2.48194	26.08	26.0671	40.58	43.2861	93.2007	50.4883	72.5586	166.889								37.0292	79.2007	42.5703	27.4249		0.0442531	0.149817	0.055346	0.0273391		0.0538708	0.108831	0.0668854	0.0348694
2015-07-14	13:19:45	00:00:05	149	2.48333	26.08	26.0672	40.49	40.1367	92.3462	30.5359	75.0793	166.833								33.8798	78.3462	22.6179	29.9456		0.0383728	0.147233	0.0200697	0.0314802		0.0540269	0.109399	0.0667914	0.0349945
2015-07-14	13:19:50	00:00:05	149.083	2.48472	26.08	26.0673	40.4	37.262	98.5352	17.6727	68.8171	166.778								31.0051	84.5352	9.7547	23.6834		0.0332857	0.166329	0.00520833	0.0216077		0.0541579	0.110086	0.066715	0.0350834
2015-07-14	13:19:55	00:00:05	149.167	2.48611	26.08	26.0674	40.45	38.8245	90.6494	22.4152	67.5354	166.722								32.5676	76.6494	14.4972	22.4017		0.036017	0.142151	0.00983329	0.0197629		0.0542975	0.110637	0.0666489	0.0351356
2015-07-14	13:20:00	00:00:05	149.25	2.4875	26.07	26.0674	40.26	33.2947	85.0098	15.0177	61.969	166.667								27.0378	71.0098	7.0997	16.8353		0.0267227	0.125752	0.00312888	0.0124985		0.0543994	0.11116	0.066478	0.0351695
2015-07-14	13:20:05	00:00:05	149.333	2.48889	26.07	26.0675	40.19	31.5125	86.5845	25.1801	63.6047	166.611								25.2556	72.5845	17.2621	18.471		0.0239541	0.130255	0.0130106	0.0145027		0.0544832	0.111588	0.0662893	0.035213
2015-07-14	13:20:10	00:00:05	149.417	2.49028	26.07	26.0675	40.15	30.5481	85.791	21.2555	61.2793	166.556								24.2912	71.791	13.3375	16.1456		0.0225039	0.127978	0.00860238	0.0116874		0.0545751	0.112025	0.0660822	0.0352553
2015-07-14	13:20:15	00:00:05	149.5	2.49167	26.07	26.0675	40.21	32.0099	89.8193	24.7864	66.2781	166.5								25.753	75.8193	16.8684	21.1444		0.0247153	0.13969	0.0125379	0.0180141		0.054675	0.112582	0.0659568	0.0353303
2015-07-14	13:20:20	00:00:05	149.583	2.49306	26.07	26.0676	40.02	27.6642	90.6494	21.7438	66.5283	166.444								21.4073	76.6494	13.8258	21.3946		0.0183747	0.142151	0.00911311	0.0183572		0.054749	0.113124	0.0657976	0.0354068
2015-07-14	13:20:25	00:00:05	149.667	2.49444	26.07	26.0676	39.95	26.2543	86.5845	26.4038	56.7017	166.389								19.9974	72.5845	18.4858	11.568		0.0164725	0.130255	0.0145214	0.00684646		0.0548143	0.113535	0.0656275	0.035394
2015-07-14	13:20:30	00:00:05	149.75	2.49583	26.07	26.0677	40.02	27.6642	96.7285	29.0741	61.969	166.333								21.4073	82.7285	21.1561	16.8353		0.0183747	0.160664	0.0180301	0.0124985		0.0548804	0.114175	0.06537	0.0354461
2015-07-14	13:20:35	00:00:05	149.833	2.49722	26.07	26.0677	39.84	24.2188	95.8252	33.7341	54.8584	166.278								17.9619	81.8252	25.8161	9.72471		0.0138669	0.157859	0.0248126	0.00518267		0.0549362	0.114807	0.0650408	0.0354677
2015-07-14	13:20:40	00:00:05	149.917	2.49861	26.07	26.0677	39.97	26.6479	98.5352	19.87	60.376	166.222								20.391	84.5352	11.952	15.2423		0.0169956	0.166329	0.00721463	0.0106565		0.055005	0.115466	0.0646883	0.0354971
2015-07-14	13:20:45	00:00:05	150	2.5	26.07	26.0678	39.93	25.8667	105.225	16.806	55.2612	166.167								19.6098	91.225	8.888	10.1275		0.0159634	0.187941	0.00448622	0.00553128		0.055063	0.11623	0.0645198	0.0355201
2015-07-14	13:20:50	00:00:05	150.083	2.50139	26.07	26.0678	39.59	20.2881	96.7285	20.7794	50.0854	166.111								14.0312	82.7285	12.8614	4.95171		0.00933121	0.160664	0.00811517	0.00175544		0.0551013	0.116896	0.0643063	0.0355274
2015-07-14	13:20:55	00:00:05	150.167	2.50278	26.07	26.0679	39.7	21.9086	89.0015	17.8009	59.0515	166.056								15.6517	75.0015	9.8829	13.9178		0.0111192	0.137281	0.00531856	0.00921058		0.0551466	0.117443	0.0641019	0.0355658
2015-07-14	13:21:00	00:00:05	150.25	2.50417	26.07	26.0679	39.55	19.7388	96.7285	39.6851	62.4329	166								13.4819	82.7285	31.7671	17.2992		0.00875223	0.160664	0.0346076	0.0130555		0.05518	0.118032	0.0639518	0.0356202
2015-07-14	13:21:05	00:00:05	150.333	2.50556	26.07	26.068	39.55	19.7388	102.295	34.8877	45.2942	165.944								13.4819	88.295	26.9697	0.160509		0.00875223	0.178353	0.0266149	7.17168e-06		0.0552144	0.11876	0.0637734	0.0355917
2015-07-14	13:21:10	00:00:05	150.417	2.50694	26.07	26.068	39.37	17.4835	100.403	27.6978	65.7837	165.889								11.2266	86.403	19.7798	20.65		0.00652523	0.172263	0.016186	0.0173433		0.0552337	0.119476	0.0636295	0.035664
2015-07-14	13:21:15	00:00:05	150.5	2.50833	26.07	26.068	39.33	17.0273	92.3462	31.2988	44.812	165.833								10.7704	78.3462	23.3808	-0.321691		0.00610516	0.147233	0.0211665	0		0.0552554	0.120038	0.0634335	0.0356445
2015-07-14	13:21:20	00:00:05	150.583	2.50972	26.07	26.0681	39.47	18.692	100.403	31.0425	35.2066	165.778								12.4351	86.403	23.1245	-9.92709		0.00768803	0.172263	0.0207956	0		0.0552835	0.120739	0.0632729	0.0356344
2015-07-14	13:21:25	00:00:05	150.667	2.51111	26.08	26.0682	39.3	16.6962	99.4629	27.2583	46.6064	165.722								10.4393	85.4629	19.3403	1.47271		0.00580692	0.169266	0.015613	0.000250991		0.055305	0.121432	0.0630487	0.0356354
2015-07-14	13:21:30	00:00:05	150.75	2.5125	26.08	26.0682	38.93	13.2111	86.5845	25.5798	41.1621	165.667								6.95417	72.5845	17.6618	-3.97159		0.00302664	0.130255	0.0134972	0		0.0553136	0.121906	0.0628822	0.0356354
2015-07-14	13:21:35	00:00:05	150.833	2.51389	26.08	26.0683	39.15	15.155	99.4629	22.937	50.4517	165.611								8.89807	85.4629	15.019	5.31801		0.00449438	0.169266	0.0104071	0.00196834		0.0553311	0.122607	0.0626558	0.0356412
2015-07-14	13:21:40	00:00:05	150.917	2.51528	26.08	26.0684	39.22	15.8508	97.6318	21.7438	47.2809	165.556								9.59387	83.6318	13.8258	2.14721		0.00507128	0.163487	0.00911311	0.000459543		0.0553495	0.123231	0.0623433	0.0356431
2015-07-14	13:21:45	00:00:05	151	2.51667	26.08	26.0685	39.21	15.7486	100.403	21.7438	53.0823	165.5								9.49167	86.403	13.8258	7.94861		0.0049849	0.172263	0.00911311	0.0037503		0.0553703	0.123913	0.0620247	0.0356587
2015-07-14	13:21:50	00:00:05	151.083	2.51806	26.08	26.0686	39.46	18.5669	110.303	18.869	57.7576	165.444								12.31	96.303	10.951	12.6239		0.00756435	0.205002	0.00627023	0.00787615		0.055389	0.124752	0.0616878	0.0356915
2015-07-14	13:21:55	00:00:05	151.167	2.51944	26.08	26.0687	39.25	16.1606	113.501	15.2283	42.1906	165.389								9.90367	99.501	7.3103	-2.94309		0.0053365	0.21603	0.00327907	0		0.0554099	0.125589	0.0614542	0.0356915
2015-07-14	13:22:00	00:00:05	151.25	2.52083	26.08	26.0687	39.1	14.682	87.3779	28.8391	46.109	165.333								8.42507	73.3779	20.9211	0.975309		0.00411736	0.132546	0.0177099	0.000129594		0.0554167	0.126128	0.0611586	0.0356921
2015-07-14	13:22:05	00:00:05	151.333	2.52222	26.07	26.0688	38.91	13.0508	104.248	20.4712	49.9054	165.278								6.79387	90.248	12.5532	4.77171		0.00291552	0.184723	0.00780551	0.00165422		0.0554283	0.12682	0.0609523	0.035699
2015-07-14	13:22:10	00:00:05	151.417	2.52361	26.07	26.0688	38.94	13.2919	103.271	40.0269	54.2603	165.222								7.03497	89.271	32.1089	9.12661		0.00308324	0.181526	0.0352068	0.00468097		0.0554406	0.12755	0.0607546	0.0357128
2015-07-14	13:22:15	00:00:05	151.5	2.525	26.07	26.0689	39.2	15.6479	96.7285	17.2943	51.5594	165.167								9.39097	82.7285	9.3763	6.42571		0.00490035	0.160664	0.00488807	0.00266627		0.0554593	0.128207	0.0604538	0.0357239
2015-07-14	13:22:20	00:00:05	151.583	2.52639	26.07	26.0689	39.41	17.9535	102.295	27.2583	44.812	165.111								11.6966	88.295	19.3403	-0.321691		0.00696891	0.178353	0.015613	0		0.0554846	0.128821	0.0601683	0.0356635
2015-07-14	13:22:25	00:00:05	151.667	2.52778	26.07	26.069	39.11	14.7766	101.343	28.3752	52.3163	165.056								8.51967	87.343	20.4572	7.18261		0.00419177	0.175279	0.0170843	0.00318769		0.0554889	0.129547	0.0597234	0.0356667
2015-07-14	13:22:30	00:00:05	151.75	2.52917	26.07	26.069	39.22	15.8508	93.2007	29.5502	46.4417	165								9.59387	79.2007	21.6322	1.30801		0.00507128	0.149817	0.0186853	0.000207512		0.0555086	0.130158	0.0593452	0.0356675
2015-07-14	13:22:35	00:00:05	151.833	2.53056	26.07	26.069	39.25	16.1606	95.8252	32.6233	49.5453	164.944								9.90367	81.8252	24.7053	4.41161		0.0053365	0.157859	0.0231225	0.00145859		0.0555276	0.130767	0.0591472	0.0356736
2015-07-14	13:22:40	00:00:05	151.917	2.53194	26.07	26.0691	39.08	14.4989	96.7285	33.1726	45.4559	164.889								8.24197	82.7285	25.2546	0.322209		0.00397478	0.160664	0.0239526	2.19307e-05		0.0555434	0.131427	0.0589773	0.035673
2015-07-14	13:22:45	00:00:05	152	2.53333	26.08	26.0692	38.89	12.8922	92.3462	23.6572	43.2495	164.833								6.63527	78.3462	15.7392	-1.88419		0.00280712	0.147233	0.0112191	0		0.0555543	0.132024	0.0587974	0.035673
2015-07-14	13:22:50	00:00:05	152.083	2.53472	26.08	26.0692	38.62	10.9802	97.6318	14.7095	49.0112	164.778								4.72327	83.6318	6.7915	3.87751		0.00162736	0.163487	0.00291388	0.00118587		0.0555599	0.132619	0.058558	0.0356752
2015-07-14	13:22:55	00:00:05	152.167	2.53611	26.08	26.0693	38.57	10.6674	100.403	24.0265	38.6505	164.722								4.41047	86.403	16.1085	-6.48319		0.00145798	0.172263	0.0116444	0		0.0555655	0.133321	0.058307	0.0356608
[truncated: 63,864 more rows]
